# Supplementary material for: Tomato RNA-seq Data Mining Reveals the Taxonomic and Functional Diversity of Root-Associated Microbiota
Source: Microorganisms. 2019 Dec 24;8(1):38. doi: 10.3390/microorganisms8010038 (PMC7022885; doi:10.3390/microorganisms8010038)
Supplement: Supplementary file 1 [file microorganisms-08-00038-s001.zip › Table S1.xls]

## Sheet: counts_LCA_annotated
BAL_R1	BAL_R2	BAL_R3	BRO_R1	BRO_R2	BRO_R3	BCONT_R1	BCONT_R2	BCONT_R3	CAL_R1	CAL_R2	CAL_R3	CRO_R1	CRO_R2	CRO_R3	CCONT_R1	CCONT_R2	CCONT_R3	taxid	rank	rank.annotation	superkingdom	kingdom	phylum	class	order	family	genus	species
9	17	4	4	7	12	17	14	8	15	43	13	24	40	25	11	16	5	1	no rank	root	root	root	root	root	root	root	root	root
141	270	214	164	167	140	166	103	99	138	381	226	273	454	218	93	236	119	2	superkingdom	Bacteria	Bacteria	root	root	root	root	root	root	root
94	122	18	25	19	35	70	45	30	39	160	52	26	90	77	16	115	25	286	genus	Pseudomonas	Bacteria	root	Proteobacteria	Gammaproteobacteria	Pseudomonadales	Pseudomonadaceae	Pseudomonas	root
43	21	3	13	8	39	19	13	28	12	35	13	9	35	22	10	35	8	287	species	Pseudomonas aeruginosa	Bacteria	root	Proteobacteria	Gammaproteobacteria	Pseudomonadales	Pseudomonadaceae	Pseudomonas	Pseudomonas aeruginosa
6	11	7	4	2	6	4	8	3	4	37	18	7	18	9	5	13	3	294	species	Pseudomonas fluorescens	Bacteria	root	Proteobacteria	Gammaproteobacteria	Pseudomonadales	Pseudomonadaceae	Pseudomonas	Pseudomonas fluorescens
1	1			1	4	2	2	5	1	2	5	3	3	1		6	1	296	species	Pseudomonas fragi	Bacteria	root	Proteobacteria	Gammaproteobacteria	Pseudomonadales	Pseudomonadaceae	Pseudomonas	Pseudomonas fragi
9	10	2	2	1	1	5	1		1	3	3		5	14	2	6	2	300	species	Pseudomonas mendocina	Bacteria	root	Proteobacteria	Gammaproteobacteria	Pseudomonadales	Pseudomonadaceae	Pseudomonas	Pseudomonas mendocina
19	30	5	3	4	7	7	6	7	6	36	5	5	6	8	4	23	4	303	species	Pseudomonas putida	Bacteria	root	Proteobacteria	Gammaproteobacteria	Pseudomonadales	Pseudomonadaceae	Pseudomonas	Pseudomonas putida
4	14	1	6	6	12	3	16	3	5	9	3	1	5	295	8	147	3	305	species	Ralstonia solanacearum	Bacteria	root	Proteobacteria	Betaproteobacteria	Burkholderiales	Burkholderiaceae	Ralstonia	Ralstonia solanacearum
31	8	1	2	1	7	1	7	6	3	3	6	5	5	6	1	11	4	316	species	Pseudomonas stutzeri	Bacteria	root	Proteobacteria	Gammaproteobacteria	Pseudomonadales	Pseudomonadaceae	Pseudomonas	Pseudomonas stutzeri
2	2					11	1	4	3	7	7	9	8	6	4	5	6	329	species	Ralstonia pickettii	Bacteria	root	Proteobacteria	Betaproteobacteria	Burkholderiales	Burkholderiaceae	Ralstonia	Ralstonia pickettii
131	203	11	19	18	38	85	36	30	31	85	71	44	66	331	19	94	27	330	species	Pseudomonas pseudoalcaligenes	Bacteria	root	Proteobacteria	Gammaproteobacteria	Pseudomonadales	Pseudomonadaceae	Pseudomonas	Pseudomonas pseudoalcaligenes
13	15	10	15	10	18		13	1		3	1	2	2	1	1	27	2	339	species	Xanthomonas campestris	Bacteria	root	Proteobacteria	Gammaproteobacteria	Xanthomonadales	Xanthomonadaceae	Xanthomonas	Xanthomonas campestris
19	21	7	14	12	11	2	13		1	4	2	1	4	5		36	3	340	no rank	Xanthomonas campestris pv. campestris	Bacteria	root	Proteobacteria	Gammaproteobacteria	Xanthomonadales	Xanthomonadaceae	Xanthomonas	Xanthomonas campestris
14	17	4	11	4	9	10	5	4	8	12	12	4	13	15	7	20	10	358	species	Agrobacterium tumefaciens	Bacteria	root	Proteobacteria	Alphaproteobacteria	Rhizobiales	Rhizobiaceae	Agrobacterium	Agrobacterium tumefaciens
				1	1		2	5	1	7	1	2	6	2	2	2	6	407	genus	Methylobacterium	Bacteria	root	Proteobacteria	Alphaproteobacteria	Rhizobiales	Methylobacteriaceae	Methylobacterium	root
54	92	34	15	30	42	62	36	19	29	59	52	28	73	86	13	172	13	469	genus	Acinetobacter	Bacteria	root	Proteobacteria	Gammaproteobacteria	Pseudomonadales	Moraxellaceae	Acinetobacter	root
37	55	27	26	12	30	46	24	30	31	121	66	40	111	81	34	107	25	470	species	Acinetobacter baumannii	Bacteria	root	Proteobacteria	Gammaproteobacteria	Pseudomonadales	Moraxellaceae	Acinetobacter	Acinetobacter baumannii
	3		2	1	2	23	1		1	1	5	2	3	3		5	1	482	genus	Neisseria	Bacteria	root	Proteobacteria	Betaproteobacteria	Neisseriales	Neisseriaceae	Neisseria	root
3	11	2	1	5	6	55	3		1		2		1	3	1	5	2	487	species	Neisseria meningitidis	Bacteria	root	Proteobacteria	Betaproteobacteria	Neisseriales	Neisseriaceae	Neisseria	Neisseria meningitidis
5	6	2	2	1	12	28	2	17	16	72	36	25	94	25	23	9	15	529	species	Ochrobactrum anthropi	Bacteria	root	Proteobacteria	Alphaproteobacteria	Rhizobiales	Brucellaceae	Ochrobactrum	Ochrobactrum anthropi
364	341	161	240	185	240	672	485	433	596	1975	1036	868	1812	686	451	830	467	543	family	Enterobacteriaceae	Bacteria	root	Proteobacteria	Gammaproteobacteria	Enterobacteriales	Enterobacteriaceae	root	root
1	3		2		8	3	1	3	1	16	4	1	3	5	1	5	1	546	species	Citrobacter freundii	Bacteria	root	Proteobacteria	Gammaproteobacteria	Enterobacteriales	Enterobacteriaceae	Citrobacter	Citrobacter freundii
2	1				2		5			1	3		6	23	1	11	1	549	species	Pantoea agglomerans	Bacteria	root	Proteobacteria	Gammaproteobacteria	Enterobacteriales	Enterobacteriaceae	Pantoea	Pantoea agglomerans
1	2	2		1	3	3		4	6	12	4	11	17	3	3	5	5	561	genus	Escherichia	Bacteria	root	Proteobacteria	Gammaproteobacteria	Enterobacteriales	Enterobacteriaceae	Escherichia	root
62	55	53	54	59	56	137	95	64	100	290	155	141	285	94	77	141	64	562	species	Escherichia coli	Bacteria	root	Proteobacteria	Gammaproteobacteria	Enterobacteriales	Enterobacteriaceae	Escherichia	Escherichia coli
3	8	1	2	5	5	4	6	4	3	7	5		1	8	4	5	1	570	genus	Klebsiella	Bacteria	root	Proteobacteria	Gammaproteobacteria	Enterobacteriales	Enterobacteriaceae	Klebsiella	root
4	3	2	1	1	1	5	4	1	5	3	5		6	1	1	6		571	species	Klebsiella oxytoca	Bacteria	root	Proteobacteria	Gammaproteobacteria	Enterobacteriales	Enterobacteriaceae	Klebsiella	Klebsiella oxytoca
8	2	3	10	5	7	3	5	1	3	2	4	1	4	3		14	1	573	species	Klebsiella pneumoniae	Bacteria	root	Proteobacteria	Gammaproteobacteria	Enterobacteriales	Enterobacteriaceae	Klebsiella	Klebsiella pneumoniae
6	5	4	2	3	4		1	1	1	1	1	1	1	1		11		614	species	Serratia liquefaciens	Bacteria	root	Proteobacteria	Gammaproteobacteria	Enterobacteriales	Enterobacteriaceae	Serratia	Serratia liquefaciens
12	12	1	5	6	10	12	5	4	9	15	11	10	8	10	2	36	5	642	genus	Aeromonas	Bacteria	root	Proteobacteria	Gammaproteobacteria	Aeromonadales	Aeromonadaceae	Aeromonas	root
3	5	1		1	7	10	2	13	5	15	12	10	19	22	3	13	8	644	species	Aeromonas hydrophila	Bacteria	root	Proteobacteria	Gammaproteobacteria	Aeromonadales	Aeromonadaceae	Aeromonas	Aeromonas hydrophila
	3	1	1	1	4	2	3	1	3	7	3	3	7	3	2	8	2	654	species	Aeromonas veronii	Bacteria	root	Proteobacteria	Gammaproteobacteria	Aeromonadales	Aeromonadaceae	Aeromonas	Aeromonas veronii
3	12	2	10	10	34	3	8	4	6	11	12	3	11	3	3	22	4	727	species	Haemophilus influenzae	Bacteria	root	Proteobacteria	Gammaproteobacteria	Pasteurellales	Pasteurellaceae	Haemophilus	Haemophilus influenzae
12	36	10	10	9	16	27	16	13	15	35	25	11	33	32	7	49	5	1224	phylum	Proteobacteria	Bacteria	root	Proteobacteria	root	root	root	root	root
24	27	10	6	6	17	31	12	6	12	38	11	11	41	38	15	51	15	1236	class	Gammaproteobacteria	Bacteria	root	Proteobacteria	Gammaproteobacteria	root	root	root	root
5	3		1		11		4	3	1	5	1	2		1	1	68		1245	species	Leuconostoc mesenteroides	Bacteria	root	Firmicutes	Bacilli	Lactobacillales	Leuconostocaceae	Leuconostoc	Leuconostoc mesenteroides
3	14		3	2	6	7	5	6	4	1	6	2	6	11	1	4	7	1269	genus	Micrococcus	Bacteria	root	Actinobacteria	Actinobacteria	Micrococcales	Micrococcaceae	Micrococcus	root
110	278	64	77	63	101	179	167	54	63	172	133	75	179	255	93	176	60	1270	species	Micrococcus luteus	Bacteria	root	Actinobacteria	Actinobacteria	Micrococcales	Micrococcaceae	Micrococcus	Micrococcus luteus
19	6	5	2	4	5	1	6	2	1	7	4	2	6	10	1	2	3	1274	species	Dermacoccus nishinomiyaensis	Bacteria	root	Actinobacteria	Actinobacteria	Micrococcales	Dermacoccaceae	Dermacoccus	Dermacoccus nishinomiyaensis
31	67	33	23	35	39	15	47	18	19	43	23	16	42	25	14	149	13	1279	genus	Staphylococcus	Bacteria	root	Firmicutes	Bacilli	Bacillales	Staphylococcaceae	Staphylococcus	root
4	14	6	7	4	23	3	6	3	5	17	11	5	13	8	6	42	5	1280	species	Staphylococcus aureus	Bacteria	root	Firmicutes	Bacilli	Bacillales	Staphylococcaceae	Staphylococcus	Staphylococcus aureus
154	240	100	68	111	178	51	209	35	72	144	103	78	163	125	61	1548	52	1282	species	Staphylococcus epidermidis	Bacteria	root	Firmicutes	Bacilli	Bacillales	Staphylococcaceae	Staphylococcus	Staphylococcus epidermidis
12	26	10	4	6	16	11	14	6	8	18	16	5	14	34	7	88	5	1283	species	Staphylococcus haemolyticus	Bacteria	root	Firmicutes	Bacilli	Bacillales	Staphylococcaceae	Staphylococcus	Staphylococcus haemolyticus
7	18	13	7	15	20	4	17		5	8	4	8	3	5	3	32	1	1288	species	Staphylococcus xylosus	Bacteria	root	Firmicutes	Bacilli	Bacillales	Staphylococcaceae	Staphylococcus	Staphylococcus xylosus
63	114	58	33	50	221	139	62	53	69	81	84	53	119	108	31	186	36	1301	genus	Streptococcus	Bacteria	root	Firmicutes	Bacilli	Lactobacillales	Streptococcaceae	Streptococcus	root
2	5			1	3	3	5	1	2	5	5	2	4	4	2	12		1302	species	Streptococcus gordonii	Bacteria	root	Firmicutes	Bacilli	Lactobacillales	Streptococcaceae	Streptococcus	Streptococcus gordonii
5	3	4	6	6	13	43	6	8	5	12	7	3	9	3	6	16	8	1304	species	Streptococcus salivarius	Bacteria	root	Firmicutes	Bacilli	Lactobacillales	Streptococcaceae	Streptococcus	Streptococcus salivarius
19	39	15	9	9	22	9	20	5	20	33	24	21	27	23	11	69	14	1308	species	Streptococcus thermophilus	Bacteria	root	Firmicutes	Bacilli	Lactobacillales	Streptococcaceae	Streptococcus	Streptococcus thermophilus
22	12	11	2	13	4		10	1				1	1	586		83	2	1311	species	Streptococcus agalactiae	Bacteria	root	Firmicutes	Bacilli	Lactobacillales	Streptococcaceae	Streptococcus	Streptococcus agalactiae
22	34	16	14	24	79	29	19	24	22	32	25	17	29	22	4	61	13	1313	species	Streptococcus pneumoniae	Bacteria	root	Firmicutes	Bacilli	Lactobacillales	Streptococcaceae	Streptococcus	Streptococcus pneumoniae
6	6	2	3	1	2	3	3		2	6	1	4	3	6		8	3	1375	genus	Aerococcus	Bacteria	root	Firmicutes	Bacilli	Lactobacillales	Aerococcaceae	Aerococcus	root
5	9	2	2	1	1	4	2		4	9	6	8	10	31	2	17	2	1377	species	Aerococcus viridans	Bacteria	root	Firmicutes	Bacilli	Lactobacillales	Aerococcaceae	Aerococcus	Aerococcus viridans
3	3	4	3	1	2	1	4		1	7	2	1	5	4	2	6	1	1578	genus	Lactobacillus	Bacteria	root	Firmicutes	Bacilli	Lactobacillales	Lactobacillaceae	Lactobacillus	root
6	14	1	9	4	5	2	3	5		5	2	2	12	5	2	12	3	1716	genus	Corynebacterium	Bacteria	root	Actinobacteria	Actinobacteria	Corynebacteriales	Corynebacteriaceae	Corynebacterium	root
15	15	5	8	11	16	10	19	15	13	17	15	17	25	17	10	23	6	1743	genus	Propionibacterium	Bacteria	root	Actinobacteria	Actinobacteria	Propionibacteriales	Propionibacteriaceae	Propionibacterium	root
1589	1560	688	857	787	1480	1219	1411	997	2110	2847	1892	1408	3276	1815	1116	2807	882	1747	species	Propionibacterium acnes	Bacteria	root	Actinobacteria	Actinobacteria	Propionibacteriales	Propionibacteriaceae	Propionibacterium	Propionibacterium acnes
24	46	27	12	10	19	9	4	11	24	27	16	24	28	55	3	17	11	1760	class	Actinobacteria	Bacteria	root	Actinobacteria	Actinobacteria	root	root	root	root
1	8	2		1	4	1	2		3			2	2	5		7		1763	genus	Mycobacterium	Bacteria	root	Actinobacteria	Actinobacteria	Corynebacteriales	Mycobacteriaceae	Mycobacterium	root
8	63	70	5	6	1	18		1			3	10	13	3	11	18	2	1813	genus	Amycolatopsis	Bacteria	root	Actinobacteria	Actinobacteria	Pseudonocardiales	Pseudonocardiaceae	Amycolatopsis	root
4	4	1	1	3	2	1	3	2		2	8	4	10	6	1	7	1	1827	genus	Rhodococcus	Bacteria	root	Actinobacteria	Actinobacteria	Corynebacteriales	Nocardiaceae	Rhodococcus	root
69	334	262	138	98	81	22	2	9	30	13	38	133	124	37	18	42	45	1883	genus	Streptomyces	Bacteria	root	Actinobacteria	Actinobacteria	Streptomycetales	Streptomycetaceae	Streptomyces	root
5	22	12	4	7	4			2	3		3	3	12	6	1	3	2	1907	species	Streptomyces glaucescens	Bacteria	root	Actinobacteria	Actinobacteria	Streptomycetales	Streptomycetaceae	Streptomyces	Streptomyces glaucescens
2	5	2	1	2	2	1	2	2			2	17	8	1			3	2070	family	Pseudonocardiaceae	Bacteria	root	Actinobacteria	Actinobacteria	Pseudonocardiales	Pseudonocardiaceae	root	root
22	45	7	14	19	22		60	47								1		2100	species	Mycoplasma hyorhinis	Bacteria	root	Tenericutes	Mollicutes	Mycoplasmatales	Mycoplasmataceae	Mycoplasma	Mycoplasma hyorhinis
445	710	364	248	301	359	38	1521	339	190	185	216	98	529	257	75	121	77	2759	superkingdom	Eukaryota	Eukaryota	root	root	root	root	root	root	root
23	26	12	111	479	114	1	56	2	30	42	60	92	302	494		11	6	4751	kingdom	Fungi	Eukaryota	Fungi	root	root	root	root	root	root
4	13	17	28	74	6	1		1	11	48	43	11	657	4			3	4762	class	Oomycetes	Eukaryota	root	root	Oomycetes	root	root	root	root
1	2	3	7	5	2				8	2	27	1	134	1				4769	genus	Saprolegnia	Eukaryota	root	root	Oomycetes	Saprolegniales	Saprolegniaceae	Saprolegnia	root
224	1047	2510	183	139	358		1	366	34	61	61	7	432	5		3		4783	genus	Phytophthora	Eukaryota	root	root	Oomycetes	Peronosporales	root	Phytophthora	root
2	5	20	2	1	4			3		2			9					4784	species	Phytophthora capsici	Eukaryota	root	root	Oomycetes	Peronosporales	root	Phytophthora	Phytophthora capsici
4	31	72	11	2	7			9	3	1	1		20					4787	species	Phytophthora infestans	Eukaryota	root	root	Oomycetes	Peronosporales	root	Phytophthora	Phytophthora infestans
4	25	62	3	3	11			6					3					4790	species	Phytophthora nicotianae	Eukaryota	root	root	Oomycetes	Peronosporales	root	Phytophthora	Phytophthora nicotianae
22	119	302	31	8	34			50		5			2					4792	species	Phytophthora parasitica	Eukaryota	root	root	Oomycetes	Peronosporales	root	Phytophthora	Phytophthora parasitica
	2		7	3	2				12	15	13	2	151	2	1			4797	genus	Pythium	Eukaryota	root	root	Oomycetes	Pythiales	Pythiaceae	Pythium	root
1	106	6	288	155	575		1			205	24	54	142	197				4876	species	Rhizophagus intraradices	Eukaryota	Fungi	Glomeromycota	Glomeromycetes	Glomerales	Glomeraceae	Rhizophagus	Rhizophagus intraradices
4	7	4	1		7		8	6	15	4	6	2	7	17	2	1	3	4890	phylum	Ascomycota	Eukaryota	Fungi	Ascomycota	root	root	root	root	root
2	4	1	3	4	3				11	5	8	4	1	6	1	1	3	4892	order	Saccharomycetales	Eukaryota	Fungi	Ascomycota	Saccharomycetes	Saccharomycetales	root	root	root
2	9	1	4	4	10	1		1	8	8	6	1	14	7	1		1	4896	species	Schizosaccharomyces pombe	Eukaryota	Fungi	Ascomycota	Schizosaccharomycetes	Schizosaccharomycetales	Schizosaccharomycetaceae	Schizosaccharomyces	Schizosaccharomyces pombe
1	5			2	8		4		3	11	10	2	6	6				4911	species	Kluyveromyces marxianus	Eukaryota	Fungi	Ascomycota	Saccharomycetes	Saccharomycetales	Saccharomycetaceae	Kluyveromyces	Kluyveromyces marxianus
14	12	5	10	50	21	8	5		15	37	16	21	21	33	9	16	4	4932	species	Saccharomyces cerevisiae	Eukaryota	Fungi	Ascomycota	Saccharomycetes	Saccharomycetales	Saccharomycetaceae	Saccharomyces	Saccharomyces cerevisiae
5	6			2	6		2		10	5	8	18	6	9		4		4952	species	Yarrowia lipolytica	Eukaryota	Fungi	Ascomycota	Saccharomycetes	Saccharomycetales	Dipodascaceae	Yarrowia	Yarrowia lipolytica
6	14	1	4	1	11	2	6	4	26	9	15	6	8	12	1	4	2	5052	genus	Aspergillus	Eukaryota	Fungi	Ascomycota	Eurotiomycetes	Eurotiales	Aspergillaceae	Aspergillus	root
11	20	9	8	1	24	1	21	10	44	17	35	14	25	37		10	2	5061	species	Aspergillus niger	Eukaryota	Fungi	Ascomycota	Eurotiomycetes	Eurotiales	Aspergillaceae	Aspergillus	Aspergillus niger
4	6	7	5	4	9	1	11	2	7	13	2	7	7	11	2	1		5073	genus	Penicillium	Eukaryota	Fungi	Ascomycota	Eurotiomycetes	Eurotiales	Aspergillaceae	Penicillium	root
60	52	94	21	14	36	2	283	9	18	22	19	9	41	25	4	11	2	5125	order	Hypocreales	Eukaryota	Fungi	Ascomycota	Sordariomycetes	Hypocreales	root	root	root
116	97	89	8	23	9		724	11	5	2	22	1	3		1			5127	species	Fusarium fujikuroi	Eukaryota	Fungi	Ascomycota	Sordariomycetes	Hypocreales	Nectriaceae	Fusarium	Fusarium fujikuroi
2	4	7		1	5		15	2	4	5	4	1	1	4	1	6		5139	order	Sordariales	Eukaryota	Fungi	Ascomycota	Sordariomycetes	Sordariales	root	root	root
9	16	20	4	3	15	3	43	8	12	13	4	5	9	16	1	11	1	5140	genus	Neurospora	Eukaryota	Fungi	Ascomycota	Sordariomycetes	Sordariales	Sordariaceae	Neurospora	root
	6	6	1	1	2		6	1	1	9	4	1	2	5		1	3	5141	species	Neurospora crassa	Eukaryota	Fungi	Ascomycota	Sordariomycetes	Sordariales	Sordariaceae	Neurospora	Neurospora crassa
2	4	2	1		7		7		6	1	2	5		2	1	1		5148	family	Sordariaceae	Eukaryota	Fungi	Ascomycota	Sordariomycetes	Sordariales	Sordariaceae	root	root
2	3	2	2	2	41		3	1	8	1	18	3	5	5	2	1	1	5204	phylum	Basidiomycota	Eukaryota	Fungi	Basidiomycota	root	root	root	root	root
2	7		2	3	8	2	2		10	7	7	2	4	5	2	2		5268	family	Ustilaginaceae	Eukaryota	Fungi	Basidiomycota	Ustilaginomycetes	Ustilaginales	Ustilaginaceae	root	root
4	2	3	1	3	7		5	1	13	7	1	2	1	6	1	5	1	5286	species	Rhodotorula toruloides	Eukaryota	Fungi	Basidiomycota	Microbotryomycetes	Sporidiobolales	Sporidiobolaceae	Rhodotorula	Rhodotorula toruloides
4			1	1	9	1	1		3	6	2	1	5	13	1			5341	species	Agaricus bisporus	Eukaryota	Fungi	Basidiomycota	Agaricomycetes	Agaricales	Agaricaceae	Agaricus	Agaricus bisporus
4	16	7	6	5	22	2	37	3	6	22	12	7	7	16	1	13	2	5455	genus	Colletotrichum	Eukaryota	Fungi	Ascomycota	Sordariomycetes	Glomerellales	Glomerellaceae	Colletotrichum	root
5	8	1	1		9		6		15	8	8	8	9	6				5500	genus	Coccidioides	Eukaryota	Fungi	Ascomycota	Eurotiomycetes	Onygenales	root	Coccidioides	root
409	274	423	77	95	69	3	2703	65	44	28	75	14	54	26	3	14	1	5506	genus	Fusarium	Eukaryota	Fungi	Ascomycota	Sordariomycetes	Hypocreales	Nectriaceae	Fusarium	root
231	214	253	61	60	28	1	15548	335	24	9	62	3	5		2	1	2	5507	species	Fusarium oxysporum	Eukaryota	Fungi	Ascomycota	Sordariomycetes	Hypocreales	Nectriaceae	Fusarium	Fusarium oxysporum
66	84	114	19	18	37	5	491	12	18	19	27	8	44	21	5	11	4	5516	species	Fusarium culmorum	Eukaryota	Fungi	Ascomycota	Sordariomycetes	Hypocreales	Nectriaceae	Fusarium	Fusarium culmorum
145	147	170	43	42	59	4	711	22	45	24	61	22	65	57	12	16		5518	species	Fusarium graminearum	Eukaryota	Fungi	Ascomycota	Sordariomycetes	Hypocreales	Nectriaceae	Fusarium	Fusarium graminearum
7	17	13	2	4	21	4	25	8	13	6	7	10	19	4		9	4	5529	genus	Metarhizium	Eukaryota	Fungi	Ascomycota	Sordariomycetes	Hypocreales	Clavicipitaceae	Metarhizium	root
8	5	8	4	2	6		33	10	4	3	2	1	7	3	1	8	2	5543	genus	Trichoderma	Eukaryota	Fungi	Ascomycota	Sordariomycetes	Hypocreales	Hypocreaceae	Trichoderma	root
	26	2	2	9	3	1			1	7	1	1	4	2	3	7	12	5778	species	Vermamoeba vermiformis	Eukaryota	root	root	root	root	Hartmannellidae	Vermamoeba	Vermamoeba vermiformis
28	50	12	20	27	29		51	36		7	1		3			1		5823	no rank	Plasmodium berghei ANKA	Eukaryota	root	Apicomplexa	Aconoidasida	Haemosporida	Plasmodiidae	Plasmodium	Plasmodium berghei
15	35		2	2	7	15	5	8	8	28	18	17	29	22	9	7	4	12916	genus	Acidovorax	Bacteria	root	Proteobacteria	Betaproteobacteria	Burkholderiales	Comamonadaceae	Acidovorax	root
19	33	13	16	7	37	2	53	8	59	42	39	18	40	55	1	20	9	27334	species	Penicillium expansum	Eukaryota	Fungi	Ascomycota	Eurotiomycetes	Eurotiales	Aspergillaceae	Penicillium	Penicillium expansum
62	163	125	49	29	89	21	407	15	57	74	42	22	61	85	14	88	18	27337	species	Verticillium dahliae	Eukaryota	Fungi	Ascomycota	Sordariomycetes	Glomerellales	Plectosphaerellaceae	Verticillium	Verticillium dahliae
2	10	6	110	249	151	2	35		1	35	21	32	155	253		1		27381	species	Funneliformis mosseae	Eukaryota	Fungi	Glomeromycota	Glomeromycetes	Glomerales	Glomeraceae	Funneliformis	Funneliformis mosseae
54	61	45	27	30	203	45	51	34	57	96	65	40	112	51	15	128	35	28037	species	Streptococcus mitis	Bacteria	root	Firmicutes	Bacilli	Lactobacillales	Streptococcaceae	Streptococcus	Streptococcus mitis
	2	2	1	1	2	10	1	2		1	1		1	7	5	6		28090	species	Acinetobacter lwoffii	Bacteria	root	Proteobacteria	Gammaproteobacteria	Pseudomonadales	Moraxellaceae	Acinetobacter	Acinetobacter lwoffii
3	4	1	1	1	10	4	4	1	11	5	3	4	12	5	2	17	2	28131	species	Prevotella intermedia	Bacteria	root	Bacteroidetes	Bacteroidia	Bacteroidales	Prevotellaceae	Prevotella	Prevotella intermedia
3	4	3	4	2	4	3	8			6	5	1	3	3	4	2	2	28211	class	Alphaproteobacteria	Bacteria	root	Proteobacteria	Alphaproteobacteria	root	root	root	root
7	11	6	5	2	3	4	4	2	2	1	2	1	3	4		7	10	28556	family	Pleosporaceae	Eukaryota	Fungi	Ascomycota	Dothideomycetes	Pleosporales	Pleosporaceae	root	root
42	98	17	21	25	28	1	81	55		1		2						28903	species	Mycoplasma bovis	Bacteria	root	Tenericutes	Mollicutes	Mycoplasmatales	Mycoplasmataceae	Mycoplasma	Mycoplasma bovis
3	1	1	1		4		2	1	2	15	7	6	2	7				28983	family	Sclerotiniaceae	Eukaryota	Fungi	Ascomycota	Leotiomycetes	Helotiales	Sclerotiniaceae	root	root
1	8	1	1		6	4	4	4	1	5		3	2	1	1	4	2	29385	species	Staphylococcus saprophyticus	Bacteria	root	Firmicutes	Bacilli	Bacillales	Staphylococcaceae	Staphylococcus	Staphylococcus saprophyticus
18	20	5	5	8	8	12	12	6	6	28	26	6	17	13	5	20	6	29388	species	Staphylococcus capitis	Bacteria	root	Firmicutes	Bacilli	Bacillales	Staphylococcaceae	Staphylococcus	Staphylococcus capitis
	2	1		1	2	1			2	12	1	7	7	13		3		29917	species	Cladosporium cladosporioides	Eukaryota	Fungi	Ascomycota	Dothideomycetes	Capnodiales	Cladosporiaceae	Cladosporium	Cladosporium cladosporioides
7	20	32	1	5	3	8			1	2	1	5	11	6	2	3	3	31958	species	Amycolatopsis orientalis	Bacteria	root	Actinobacteria	Actinobacteria	Pseudonocardiales	Pseudonocardiaceae	Amycolatopsis	Amycolatopsis orientalis
					2					5			6	5				32595	species	Babesia divergens	Eukaryota	root	Apicomplexa	Aconoidasida	root	Babesiidae	Babesia	Babesia divergens
6	5	3	1	5	1	4	2	2	2	3	2	1	15	2	3	3		33050	species	Sphingopyxis macrogoltabida	Bacteria	root	Proteobacteria	Alphaproteobacteria	Sphingomonadales	Sphingomonadaceae	Sphingopyxis	Sphingopyxis macrogoltabida
24	56	23	12	9	65	8	57	17	96	70	57	51	60	70	13	18	3	33154	no rank	Opisthokonta	Eukaryota	root	root	root	root	root	root	root
18	36	16	10	9	24	9	20	6	16	7	5	76	12	21	1	12	27	33194	genus	Bipolaris	Eukaryota	Fungi	Ascomycota	Dothideomycetes	Pleosporales	Pleosporaceae	Bipolaris	root
			8	6	1					4		11	26	10	1			34034	species	uncultured delta proteobacterium	Bacteria	root	Proteobacteria	Deltaproteobacteria	root	root	root	uncultured delta proteobacterium
181	2030	119	101	142	122	168	601	153	205	509	279	181	435	348	196	495	142	34062	species	Moraxella osloensis	Bacteria	root	Proteobacteria	Gammaproteobacteria	Pseudomonadales	Moraxellaceae	Moraxella	Moraxella osloensis
			1		1	1	6	1						1	5	12	3	35226	species	Dimastigella trypaniformis	Eukaryota	root	root	root	Kinetoplastida	Bodonidae	Dimastigella	Dimastigella trypaniformis
5	2	17	1	2	1		5	1		3	1			2		1		35718	family	Chaetomiaceae	Eukaryota	Fungi	Ascomycota	Sordariomycetes	Sordariales	Chaetomiaceae	root	root
1	3		1		5	1		1	8	9	6	1	5	7				36022	species	Cyberlindnera fabianii	Eukaryota	Fungi	Ascomycota	Saccharomycetes	Saccharomycetales	Phaffomycetaceae	Cyberlindnera	Cyberlindnera fabianii
			1		1	1	5	7				1	1	3	7		10	36064	order	Cantharellales	Eukaryota	Fungi	Basidiomycota	Agaricomycetes	Cantharellales	root	root	root
	9	1	10	35	64					26	4	14	37	27		1		36750	order	Glomerales	Eukaryota	Fungi	Glomeromycota	Glomeromycetes	Glomerales	root	root	root
	23	3	85	161	110		4			89	6	53	80	115				36751	family	Glomeraceae	Eukaryota	Fungi	Glomeromycota	Glomeromycetes	Glomerales	Glomeraceae	root	root
5	9	3	5	2	1	1			2		1	3	4	1	1	2	2	38300	species	Streptomyces pristinaespiralis	Bacteria	root	Actinobacteria	Actinobacteria	Streptomycetales	Streptomycetaceae	Streptomyces	Streptomyces pristinaespiralis
	2	1	1	1	5		3	1	7	9	10	9	9	12			1	38946	genus	Paracoccidioides	Eukaryota	Fungi	Ascomycota	Eurotiomycetes	Onygenales	root	Paracoccidioides	root
3	17	20	5	7	7					1	1	6	7	4		4		40318	species	Streptomyces nodosus	Bacteria	root	Actinobacteria	Actinobacteria	Streptomycetales	Streptomycetaceae	Streptomyces	Streptomyces nodosus
71	19	6	12	8	35	46	30	26	25	44	46	26	88	49	20	29	22	40324	species	Stenotrophomonas maltophilia	Bacteria	root	Proteobacteria	Gammaproteobacteria	Xanthomonadales	Xanthomonadaceae	Stenotrophomonas	Stenotrophomonas maltophilia
13	8	1	1	1	6			2	1	5		1	4	7	6	3		40559	species	Botrytis cinerea	Eukaryota	Fungi	Ascomycota	Leotiomycetes	Helotiales	Sclerotiniaceae	Botrytis	Botrytis cinerea
4	3	1	2			2			2	6	5		3	3		7	2	41297	family	Sphingomonadaceae	Bacteria	root	Proteobacteria	Alphaproteobacteria	Sphingomonadales	Sphingomonadaceae	root	root
6	6	2	2	1	8	2	7	3	10	15	6	4	11	12		4		43219	family	Herpotrichiellaceae	Eukaryota	Fungi	Ascomycota	Eurotiomycetes	Chaetothyriales	Herpotrichiellaceae	root	root
18	14	1			12	4	1	1	6	13	5	3	13	7	8	11	2	43263	species	Pseudomonas alcaligenes	Bacteria	root	Proteobacteria	Gammaproteobacteria	Pseudomonadales	Pseudomonadaceae	Pseudomonas	Pseudomonas alcaligenes
33	39	19	21	29	69	105	55	20	18	28	16	8	33	40	12	111	7	43675	species	Rothia mucilaginosa	Bacteria	root	Actinobacteria	Actinobacteria	Micrococcales	Micrococcaceae	Rothia	Rothia mucilaginosa
1	2	2	2	1	2	4	4		5	4	3		11	6	4	5	1	44056	species	Aureococcus anophagefferens	Eukaryota	root	root	Pelagophyceae	Pelagomonadales	root	Aureococcus	Aureococcus anophagefferens
1	4		1	1	2		28	5	2	449	6	9	12	1	10	9	1	44415	species	Eimeria mitis	Eukaryota	root	Apicomplexa	Coccidia	Eucoccidiorida	Eimeriidae	Eimeria	Eimeria mitis
	1		1	5	8				3	2	3		7	4	1	2	1	44689	species	Dictyostelium discoideum	Eukaryota	root	root	root	Dictyosteliida	root	Dictyostelium	Dictyostelium discoideum
1	1		3	6	11		3		9	7	7	4	10	9	1			45286	species	Eremothecium sinecaudum	Eukaryota	Fungi	Ascomycota	Saccharomycetes	Saccharomycetales	Saccharomycetaceae	Eremothecium	Eremothecium sinecaudum
					1					8	1	5	5	5				47209	species	Scutellinia scutellata	Eukaryota	Fungi	Ascomycota	Pezizomycetes	Pezizales	Pyronemataceae	Scutellinia	Scutellinia scutellata
3	2		3		1	4	3	3	2	14	10	1	32	6	1	4	3	47878	species	Pseudomonas azotoformans	Bacteria	root	Proteobacteria	Gammaproteobacteria	Pseudomonadales	Pseudomonadaceae	Pseudomonas	Pseudomonas azotoformans
3	3	3		1	1	54	1	1	2	6	4	1	1	1		1	8	47885	species	Pseudomonas oryzihabitans	Bacteria	root	Proteobacteria	Gammaproteobacteria	Pseudomonadales	Pseudomonadaceae	Pseudomonas	Pseudomonas oryzihabitans
5	11	2	2	2	8	3	2	2	3	8	4	3	8	6	2	21		48296	species	Acinetobacter pittii	Bacteria	root	Proteobacteria	Gammaproteobacteria	Pseudomonadales	Moraxellaceae	Acinetobacter	Acinetobacter pittii
1	2		2		2	8	1	9	7	6	4	3	10	7	9	3	3	48736	genus	Ralstonia	Bacteria	root	Proteobacteria	Betaproteobacteria	Burkholderiales	Burkholderiaceae	Ralstonia	root
8	12	5	3	4	30	1	17	3	25	9	18	12	25	17	6	4	2	49012	species	Sporisorium scitamineum	Eukaryota	Fungi	Basidiomycota	Ustilaginomycetes	Ustilaginales	Ustilaginaceae	Sporisorium	Sporisorium scitamineum
8	3	2	1	7	7	6	1	1	4	17	7	5	5	4	2	8	4	51665	species	Aerococcus urinaeequi	Bacteria	root	Firmicutes	Bacilli	Lactobacillales	Aerococcaceae	Aerococcus	Aerococcus urinaeequi
1	4	1	1		2	2	4		1	2	1	2	4	7		5	5	53408	species	Pseudomonas citronellolis	Bacteria	root	Proteobacteria	Gammaproteobacteria	Pseudomonadales	Pseudomonadaceae	Pseudomonas	Pseudomonas citronellolis
			16	83	130	1					10	12	57	62				58152	species	Claroideoglomus claroideum	Eukaryota	Fungi	Glomeromycota	Glomeromycetes	Glomerales	Claroideoglomeraceae	Claroideoglomus	Claroideoglomus claroideum
65	65	73	10	24	11		18312	386	8	1	13	4	3	1	1			59765	no rank	Fusarium oxysporum f. sp. lycopersici	Eukaryota	Fungi	Ascomycota	Sordariomycetes	Hypocreales	Nectriaceae	Fusarium	Fusarium oxysporum
19	17	15	4	4	7		214	5	2		2			2				61366	forma	Fusarium oxysporum f. cubense	Eukaryota	Fungi	Ascomycota	Sordariomycetes	Hypocreales	Nectriaceae	Fusarium	Fusarium oxysporum
19	17	9	6	3	1		357	7	2		2	1						61374	no rank	Fusarium oxysporum f. sp. vasinfectum	Eukaryota	Fungi	Ascomycota	Sordariomycetes	Hypocreales	Nectriaceae	Fusarium	Fusarium oxysporum
	3		2		6				3	4	3	3	11	9				63400	species	Arthroderma benhamiae	Eukaryota	Fungi	Ascomycota	Eurotiomycetes	Onygenales	Arthrodermataceae	Arthroderma	Arthroderma benhamiae
3	36	5							7	2	43	5	5	1				65070	species	Pythium aphanidermatum	Eukaryota	root	root	Oomycetes	Pythiales	Pythiaceae	Pythium	Pythium aphanidermatum
22	104	176	113	61	33	3	4	20	100	166	171	4	1450	14	2	9	4	67593	species	Phytophthora sojae	Eukaryota	root	root	Oomycetes	Peronosporales	root	Phytophthora	Phytophthora sojae
6	33	16	4	7	11	1			3	4	5	10	9	4	2	1		68214	species	Streptomyces griseochromogenes	Bacteria	root	Actinobacteria	Actinobacteria	Streptomycetales	Streptomycetaceae	Streptomyces	Streptomyces griseochromogenes
3	42	18	6	6	4			2	80	186	32	56		75				70189	species	Olpidium brassicae	Eukaryota	Fungi	root	root	root	Olpidiaceae	Olpidium	Olpidium brassicae
	5	20	2		3		9				1		4					70791	no rank	Nectria haematococca mpVI	Eukaryota	Fungi	Ascomycota	Sordariomycetes	Hypocreales	Nectriaceae	Fusarium	Nectria haematococca
	5	1		2	3		1		3	2	2	1	1	3	6	5	1	71804	species	Trypanosoma grayi	Eukaryota	root	root	root	Kinetoplastida	Trypanosomatidae	Trypanosoma	Trypanosoma grayi
77	13	8	8	3	10	7	7	6	6	8	13	2	12	53	5	19	7	71999	species	Kocuria palustris	Bacteria	root	Actinobacteria	Actinobacteria	Micrococcales	Micrococcaceae	Kocuria	Kocuria palustris
1	5	2	1	3	3	2	5	4	5	6	4	4	5	3	1	5		72758	subspecies	Staphylococcus capitis subsp. capitis	Bacteria	root	Firmicutes	Bacilli	Bacillales	Staphylococcaceae	Staphylococcus	Staphylococcus capitis
21	9	7	4	2	4		3	4	11	6	7	10	6	6	2	3		76773	species	Malassezia globosa	Eukaryota	Fungi	Basidiomycota	Malasseziomycetes	Malasseziales	Malasseziaceae	Malassezia	Malassezia globosa
17	82	8	29	53	38	11	19	13	47	71	44	64	115	123	16	43	18	77133	species	uncultured bacterium	Bacteria	root	root	root	root	root	root	uncultured bacterium
4	8	1	3		24				17	22	19	16	11	23				80258	species	Neottiella rutilans	Eukaryota	Fungi	Ascomycota	Pezizomycetes	Pezizales	Pyronemataceae	Neottiella	Neottiella rutilans
	3	2	5	2		8	4	2	2	8	4	3	11	7	5	8	5	80840	order	Burkholderiales	Bacteria	root	Proteobacteria	Betaproteobacteria	Burkholderiales	root	root	root
2	7	1	1	1	3	9	1	1	1	9	6	2	7	2		5	2	80864	family	Comamonadaceae	Bacteria	root	Proteobacteria	Betaproteobacteria	Burkholderiales	Comamonadaceae	root	root
2	10			1	5		2	1	10	2	4	1	4	11				82105	genus	Cladophialophora	Eukaryota	Fungi	Ascomycota	Eurotiomycetes	Chaetothyriales	Herpotrichiellaceae	Cladophialophora	root
13	16	1	5	9	38	5	3	1	5	7	4		6	8		38		83655	species	Leclercia adecarboxylata	Bacteria	root	Proteobacteria	Gammaproteobacteria	Enterobacteriales	Enterobacteriaceae	Leclercia	Leclercia adecarboxylata
1	4	4	11	2	17	1	9	2	10	6	11	2	9	9		1	3	84753	species	Moesziomyces antarcticus	Eukaryota	Fungi	Basidiomycota	Ustilaginomycetes	Ustilaginales	Ustilaginaceae	Moesziomyces	Moesziomyces antarcticus
1	13	6	1	2	7	3	19	4	1	2	3	4	5	7		9		85698	species	Achromobacter xylosoxidans	Bacteria	root	Proteobacteria	Betaproteobacteria	Burkholderiales	Alcaligenaceae	Achromobacter	Achromobacter xylosoxidans
6	40	4	6	3	40	2	10	4	57	38	42	18	40	63		3	2	91928	species	Exophiala spinifera	Eukaryota	Fungi	Ascomycota	Eurotiomycetes	Chaetothyriales	Herpotrichiellaceae	Exophiala	Exophiala spinifera
1	3	3		2	4	2	3	1	4	7	3	5	6	9		1	1	92860	order	Pleosporales	Eukaryota	Fungi	Ascomycota	Dothideomycetes	Pleosporales	root	root	root
1	10		20	17	67				2	24	8	6	26	28				94130	species	Rhizophagus clarus	Eukaryota	Fungi	Glomeromycota	Glomeromycetes	Glomerales	Glomeraceae	Rhizophagus	Rhizophagus clarus
8	43	9	15	69	29	2	1	4	3	52	17	4	67	28	14	2	22	100272	species	uncultured eukaryote	Eukaryota	root	root	root	root	root	root	uncultured eukaryote
	1	1	1	1	6	2	3	9	5	7	7	2	20	11	5	13	4	105219	species	Ralstonia mannitolilytica	Bacteria	root	Proteobacteria	Betaproteobacteria	Burkholderiales	Burkholderiaceae	Ralstonia	Ralstonia mannitolilytica
4	12	3	3	1	2	3	5	1	3	8	1	1	4	3		13	1	106649	species	Acinetobacter guillouiae	Bacteria	root	Proteobacteria	Gammaproteobacteria	Pseudomonadales	Moraxellaceae	Acinetobacter	Acinetobacter guillouiae
1	6				2				1		6		5		1	5		106654	species	Acinetobacter nosocomialis	Bacteria	root	Proteobacteria	Gammaproteobacteria	Pseudomonadales	Moraxellaceae	Acinetobacter	Acinetobacter nosocomialis
18	7	20	4	7	4	1	89	1	3	2	4	1	14	1			1	110618	family	Nectriaceae	Eukaryota	Fungi	Ascomycota	Sordariomycetes	Hypocreales	Nectriaceae	root	root
	1		1		5				10	6	1	6	1	7				110846	family	Pyronemataceae	Eukaryota	Fungi	Ascomycota	Pezizomycetes	Pezizales	Pyronemataceae	root	root
3	10	5	21	10	14	2	8	2	11	24	35	2	260	3	1	1	1	112090	species	Aphanomyces astaci	Eukaryota	root	root	Oomycetes	Saprolegniales	Saprolegniaceae	Aphanomyces	Aphanomyces astaci
18	12	18	5	5	4		334	2	3				1	1	1			117187	species	Fusarium verticillioides	Eukaryota	Fungi	Ascomycota	Sordariomycetes	Hypocreales	Nectriaceae	Fusarium	Fusarium verticillioides
	6		3	10	13					10		1	3	5				118614	species	Rhizophagus diaphanus	Eukaryota	Fungi	Glomeromycota	Glomeromycetes	Glomerales	Glomeraceae	Rhizophagus	Rhizophagus diaphanus
		1	3		1			12				7	23	14		19		124036	species	Thielaviopsis basicola	Eukaryota	Fungi	Ascomycota	Sordariomycetes	Microascales	Ceratocystidaceae	Thielaviopsis	Thielaviopsis basicola
1	2			1		2	3	3	3	13	13	6	21	9	6	2	4	129337	genus	Geobacillus	Bacteria	root	Firmicutes	Bacilli	Bacillales	Bacillaceae	Geobacillus	root
231	318	310	341	273	280	207	241	89	187	437	277	230	456	513	131	482	125	131567	no rank	cellular organisms	root	root	root	root	root	root	root	root
38	25	1	3	2	3	9	5	4	3	8	13	4	14	36	6	17	9	136841	species group	Pseudomonas aeruginosa group	Bacteria	root	Proteobacteria	Gammaproteobacteria	Pseudomonadales	Pseudomonadaceae	Pseudomonas	root
	8	2	1		4	1				5	4		3		1	5		136845	species group	Pseudomonas putida group	Bacteria	root	Proteobacteria	Gammaproteobacteria	Pseudomonadales	Pseudomonadaceae	Pseudomonas	root
7	13	6	17	2	10		5		5	7	3	2	5	2	1	15	3	146827	species	Corynebacterium simulans	Bacteria	root	Actinobacteria	Actinobacteria	Corynebacteriales	Corynebacteriaceae	Corynebacterium	Corynebacterium simulans
4	16	9	7	5	5	1	1			2	4	7	5	3			1	146923	species	Streptomyces parvulus	Bacteria	root	Actinobacteria	Actinobacteria	Streptomycetales	Streptomycetaceae	Streptomyces	Streptomyces parvulus
22	37	10	11	6	45	2	30	4	66	50	48	46	48	74		3		147538	subphylum	Pezizomycotina	Eukaryota	Fungi	Ascomycota	root	root	root	root	root
10	10	4	1	3	12	2	5	3	11	8	4	8	12	19	2	3	7	147541	class	Dothideomycetes	Eukaryota	Fungi	Ascomycota	Dothideomycetes	root	root	root	root
7	15		5		16		9	3	24	20	24	14	19	21		7		147545	class	Eurotiomycetes	Eukaryota	Fungi	Ascomycota	Eurotiomycetes	root	root	root	root
3	2		4		6				11	6	3	3	1	8				147548	class	Leotiomycetes	Eukaryota	Fungi	Ascomycota	Leotiomycetes	root	root	root	root
91	132	115	55	34	92	15	527	44	84	100	75	44	114	102	14	77	14	147550	class	Sordariomycetes	Eukaryota	Fungi	Ascomycota	Sordariomycetes	root	root	root	root
4	6	1		2	20			1	1			2	3	5	3			155619	class	Agaricomycetes	Eukaryota	Fungi	Basidiomycota	Agaricomycetes	root	root	root	root
3	3	1	2	5	5	4	1	1	7	13	4	44	33	30	1		1	155900	species	uncultured organism	root	root	root	root	root	root	root	uncultured organism
3	20	22	22	7	11		2	4	14	29	33	5	247	1	2	2	1	157072	species	Aphanomyces invadans	Eukaryota	root	root	Oomycetes	Saprolegniales	Saprolegniaceae	Aphanomyces	Aphanomyces invadans
18	16	5	8	3	14	6	7	7	5	3	6	7	7	7	2	10	4	161899	species	Corynebacterium singulare	Bacteria	root	Actinobacteria	Actinobacteria	Corynebacteriales	Corynebacteriaceae	Corynebacterium	Corynebacterium singulare
1	1	2			3		3		5	9	2	2	3	11		2	1	162425	species	Aspergillus nidulans	Eukaryota	Fungi	Ascomycota	Eurotiomycetes	Eurotiales	Aspergillaceae	Aspergillus	Aspergillus nidulans
	7			15	4	1	5	5	1	9	1	5	7	7	1		16	167647	species	uncultured soil fungus	Eukaryota	Fungi	root	root	root	root	root	uncultured soil fungus
21	24	28	7	3	3		202		2		6							171627	no rank	Fusarium fujikuroi species complex	Eukaryota	Fungi	Ascomycota	Sordariomycetes	Hypocreales	Nectriaceae	Fusarium	root
	16	3	3	8	7	2	1			5	2	4	8	11	9		4	175245	species	uncultured fungus	Eukaryota	Fungi	root	root	root	root	root	uncultured fungus
			15	16	6		5	10	6	37	44	5	59	44	41	1	1	179408	no rank	Oscillatoria nigro-viridis PCC 7112	Bacteria	root	Cyanobacteria	root	Oscillatoriales	root	Oscillatoria	Oscillatoria nigro-viridis
4	4	1	1	1	1	8	5	8	3	3	3	5	17	10	9	8	2	190721	species	Ralstonia insidiosa	Bacteria	root	Proteobacteria	Betaproteobacteria	Burkholderiales	Burkholderiaceae	Ralstonia	Ralstonia insidiosa
7	4	2	8	2	31				14	11	8	8	11	18	1		1	192523	varietas	Agaricus bisporus var. bisporus	Eukaryota	Fungi	Basidiomycota	Agaricomycetes	Agaricales	Agaricaceae	Agaricus	Agaricus bisporus
5	16	2	1	1	5	1	12	3		13	1	1	10	11	3	15	1	198620	species	Pseudomonas koreensis	Bacteria	root	Proteobacteria	Gammaproteobacteria	Pseudomonadales	Pseudomonadaceae	Pseudomonas	Pseudomonas koreensis
4	14	21	1	7	3	3					1	14	14	2	7		3	208439	species	Amycolatopsis japonica	Bacteria	root	Actinobacteria	Actinobacteria	Pseudonocardiales	Pseudonocardiaceae	Amycolatopsis	Amycolatopsis japonica
						4	1	2		4	4	6	6	7	3	1	2	211586	no rank	Shewanella oneidensis MR-1	Bacteria	root	Proteobacteria	Gammaproteobacteria	Alteromonadales	Shewanellaceae	Shewanella	Shewanella oneidensis
28	52	13	9	5	51		8		87	56	61	41	51	77	2	4	5	212818	species	Exophiala mesophila	Eukaryota	Fungi	Ascomycota	Eurotiomycetes	Chaetothyriales	Herpotrichiellaceae	Exophiala	Exophiala mesophila
1	3	5	144	858	161		1			34	17	73	532	462				214504	phylum	Glomeromycota	Eukaryota	Fungi	Glomeromycota	root	root	root	root	root
			3	54	7					1		4	27	22				214506	class	Glomeromycetes	Eukaryota	Fungi	Glomeromycota	Glomeromycetes	root	root	root	root
10	16	2	5	7	38		18	2	48	28	24	17	22	38	3	3	2	215243	species	Exophiala oligosperma	Eukaryota	Fungi	Ascomycota	Eurotiomycetes	Chaetothyriales	Herpotrichiellaceae	Exophiala	Exophiala oligosperma
24	41	12	11	4	56	14	10	6	56	36	34	18	36	44		9	34	220671	no rank	Leptosphaeria maculans complex	Eukaryota	Fungi	Ascomycota	Dothideomycetes	Pleosporales	Leptosphaeriaceae	Leptosphaeria	root
5	7	6		1	3		1	1	4	8	1	2	1	3		4	12	220672	species	Leptosphaeria biglobosa	Eukaryota	Fungi	Ascomycota	Dothideomycetes	Pleosporales	Leptosphaeriaceae	Leptosphaeria	Leptosphaeria biglobosa
56	69	82	23	23	52	11	292	30	31	32	27	11	46	31	3	50	9	222543	subclass	Hypocreomycetidae	Eukaryota	Fungi	Ascomycota	Sordariomycetes	root	root	root	root
3	12	6	6	1	3	1	30	4	7	4	5	4	7	7	3	8	2	222544	subclass	Sordariomycetidae	Eukaryota	Fungi	Ascomycota	Sordariomycetes	root	root	root	root
5	4		1		22		1		24	14	10	3	6	13		1		222929	no rank	Coccidioides posadasii C735 delta SOWgp	Eukaryota	Fungi	Ascomycota	Eurotiomycetes	Onygenales	root	Coccidioides	Coccidioides posadasii
46	71	17	15	8	47	26	36	14	39	35	24	15	30	49	1	15	92	225338	no rank	Leptosphaeria biglobosa 'brassicae' group	Eukaryota	Fungi	Ascomycota	Dothideomycetes	Pleosporales	Leptosphaeriaceae	Leptosphaeria	Leptosphaeria biglobosa
15	26	9	12	5	18	7	8	5	28	25	20	9	12	26		8	26	225343	no rank	Leptosphaeria maculans 'lepidii' group	Eukaryota	Fungi	Ascomycota	Dothideomycetes	Pleosporales	Leptosphaeriaceae	Leptosphaeria	Leptosphaeria maculans
33	61	12	15	5	32	13	23	11	36	28	25	11	21	29	1	18	44	225344	no rank	Leptosphaeria biglobosa 'thlaspii' group	Eukaryota	Fungi	Ascomycota	Dothideomycetes	Pleosporales	Leptosphaeriaceae	Leptosphaeria	Leptosphaeria biglobosa
16	14	4	5	2	8	10	4	6	5	12	9	7	20	15	2	31	5	227290	no rank	Rhizobium/Agrobacterium group	Bacteria	root	Proteobacteria	Alphaproteobacteria	Rhizobiales	Rhizobiaceae	root	root
4	12	8	2	1	5		7	2	4	12	14	4	7	8		4	14	227321	no rank	Aspergillus nidulans FGSC A4	Eukaryota	Fungi	Ascomycota	Eurotiomycetes	Eurotiales	Aspergillaceae	Aspergillus	Aspergillus nidulans
6	37	35	21	11	11				3	1	6	12	3	6		3	2	227882	no rank	Streptomyces avermitilis MA-4680 = NBRC 14893	Bacteria	root	Actinobacteria	Actinobacteria	Streptomycetales	Streptomycetaceae	Streptomyces	Streptomyces avermitilis
124	99	143	25	24	46		603	15	26	24	36	14	20	25	2	9	5	229533	no rank	Fusarium graminearum PH-1	Eukaryota	Fungi	Ascomycota	Sordariomycetes	Hypocreales	Nectriaceae	Fusarium	Fusarium graminearum
			3	15	1					5		6	12	10				231054	no rank	environmental samples	Eukaryota	Fungi	Glomeromycota	Glomeromycetes	Glomerales	Glomeraceae	root	root
	1		7	20	8					3		1	15	9				231055	species	uncultured Glomus	Eukaryota	Fungi	Glomeromycota	Glomeromycetes	Glomerales	Glomeraceae	root	uncultured Glomus
6	16		2	2	2	17	2	2	5	14	6	8	17	12	5	8	6	232721	species	Acidovorax sp. JS42	Bacteria	root	Proteobacteria	Betaproteobacteria	Burkholderiales	Comamonadaceae	Acidovorax	Acidovorax sp. JS42
3	3		2	2	21		1	3	11	13	9	5	9	8	2	2	1	235443	no rank	Cryptococcus neoformans var. grubii H99	Eukaryota	Fungi	Basidiomycota	Tremellomycetes	Tremellales	Tremellaceae	Filobasidiella	Cryptococcus neoformans
3	5	2	1	1	8		6	2	7		6	1	12	8		3	1	237631	no rank	Ustilago maydis 521	Eukaryota	Fungi	Basidiomycota	Ustilaginomycetes	Ustilaginales	Ustilaginaceae	Ustilago	Ustilago maydis
6	5	1	6	3	48		5	2	14	3	11	2	2	44	2			240176	no rank	Coprinopsis cinerea okayama7#130	Eukaryota	Fungi	Basidiomycota	Agaricomycetes	Agaricales	Psathyrellaceae	Coprinopsis	Coprinopsis cinerea
		1	11	73	15		1			6	1	11	44	43				241622	species	uncultured Glomeromycota	Eukaryota	Fungi	Glomeromycota	root	root	root	root	uncultured Glomeromycota
11	12	2	4	1	15	1	7	2	21	17	18	9	18	23			3	246410	no rank	Coccidioides immitis RS	Eukaryota	Fungi	Ascomycota	Eurotiomycetes	Onygenales	root	Coccidioides	Coccidioides immitis
4	6	3	1	3	2	4	7	2	1	3	1	2	1	5	1	9	3	246432	species	Staphylococcus equorum	Bacteria	root	Firmicutes	Bacilli	Bacillales	Staphylococcaceae	Staphylococcus	Staphylococcus equorum
2	8	12	1	5	1		99		1		1							246455	species	Fusarium foetens	Eukaryota	Fungi	Ascomycota	Sordariomycetes	Hypocreales	Nectriaceae	Fusarium	Fusarium foetens
9	18	4	5	4	21	1	5	6	34	35	15	15	25	30		3	9	253628	species	Verruconis gallopava	Eukaryota	Fungi	Ascomycota	Dothideomycetes	Venturiales	Sympoventuriaceae	Verruconis	Verruconis gallopava
		2	4	4	11		2	1	2	3	5		6	3		2		261658	species	Dictyostelium fasciculatum	Eukaryota	root	root	root	Dictyosteliida	root	Dictyostelium	Dictyostelium fasciculatum
	6	3			3	5	3	3	1	2		2	10	8	2	6		267747	no rank	Propionibacterium acnes KPA171202	Bacteria	root	Actinobacteria	Actinobacteria	Propionibacteriales	Propionibacteriaceae	Propionibacterium	Propionibacterium acnes
1	27	2	3	4	5	5	10		2	14	3	3	10	8	3	8	6	284592	no rank	Debaryomyces hansenii CBS767	Eukaryota	Fungi	Ascomycota	Saccharomycetes	Saccharomycetales	Debaryomycetaceae	Debaryomyces	Debaryomyces hansenii
2	2		1		6		1	1	5	4	3	5	9	11				284812	no rank	Schizosaccharomyces pombe 972h-	Eukaryota	Fungi	Ascomycota	Schizosaccharomycetes	Schizosaccharomycetales	Schizosaccharomycetaceae	Schizosaccharomyces	Schizosaccharomyces pombe
2	9		6	5	8		21	14										289397	no rank	Mycoplasma bovis PG45	Bacteria	root	Tenericutes	Mollicutes	Mycoplasmatales	Mycoplasmataceae	Mycoplasma	Mycoplasma bovis
19	52	247	18	5	51	6	66	5	56	55	32	20	32	52	1	27	4	306901	no rank	Chaetomium globosum CBS 148.51	Eukaryota	Fungi	Ascomycota	Sordariomycetes	Sordariales	Chaetomiaceae	Chaetomium	Chaetomium globosum
2	4		2	1	7		2		18	7	11	4	11	14	4	2		306902	no rank	Clavispora lusitaniae ATCC 42720	Eukaryota	Fungi	Ascomycota	Saccharomycetes	Saccharomycetales	Metschnikowiaceae	Clavispora	Clavispora lusitaniae
3	8	3	10	2	9	2	4	4	4	16	10	3	13	10	5	23	1	314315	no rank	Lactobacillus sakei subsp. sakei 23K	Bacteria	root	Firmicutes	Bacilli	Lactobacillales	Lactobacillaceae	Lactobacillus	Lactobacillus sakei
2	7		3		5	1	3	1	1	3		3	2	1	1	6		318586	no rank	Paracoccus denitrificans PD1222	Bacteria	root	Proteobacteria	Alphaproteobacteria	Rhodobacterales	Rhodobacteraceae	Paracoccus	Paracoccus denitrificans
5	8	3	3	2	5	4	4	1	3	4	1	1	9	4	1	10	13	321614	no rank	Parastagonospora nodorum SN15	Eukaryota	Fungi	Ascomycota	Dothideomycetes	Pleosporales	Phaeosphaeriaceae	Parastagonospora	Parastagonospora nodorum
					1	2			1	16	6	3	7	3	1		2	324831	no rank	Lactobacillus gasseri ATCC 33323 = JCM 1131	Bacteria	root	Firmicutes	Bacilli	Lactobacillales	Lactobacillaceae	Lactobacillus	Lactobacillus gasseri
5	4	1		1	2	2	6	2	3	7	3	2		4	2	9	11	330879	no rank	Aspergillus fumigatus Af293	Eukaryota	Fungi	Ascomycota	Eurotiomycetes	Eurotiales	Aspergillaceae	Aspergillus	Aspergillus fumigatus
8	11	6	4	5	10	1	7	4	9	7	9	1	7	18		5	3	331117	no rank	Aspergillus fischeri NRRL 181	Eukaryota	Fungi	Ascomycota	Eurotiomycetes	Eurotiales	Aspergillaceae	Aspergillus	Aspergillus fischeri
28	54	5	19	8	77	3	14		85	62	49	45	68	97	3	7	2	332648	no rank	Botrytis cinerea B05.10	Eukaryota	Fungi	Ascomycota	Leotiomycetes	Helotiales	Sclerotiniaceae	Botrytis	Botrytis cinerea
2	7	3	1	15	2	2	9		3	2	1	4	3	4	2	8	2	334413	no rank	Finegoldia magna ATCC 29328	Bacteria	root	Firmicutes	Tissierellia	Tissierellales	Peptoniphilaceae	Finegoldia	Finegoldia magna
6	17	5	7	21	11				10	191	15	200	112	156				337075	species	Pyronema omphalodes	Eukaryota	Fungi	Ascomycota	Pezizomycetes	Pezizales	Pyronemataceae	Pyronema	Pyronema omphalodes
4	13	2	4	3	10		2		25	6	15	5	5	18		1	2	339724	no rank	Histoplasma capsulatum NAm1	Eukaryota	Fungi	Ascomycota	Eurotiomycetes	Onygenales	Ajellomycetaceae	Histoplasma	Histoplasma capsulatum
8	11	9	4	4	6	3	13	7	15	6	9	6	22	17	2	4	2	341663	no rank	Aspergillus terreus NIH2624	Eukaryota	Fungi	Ascomycota	Eurotiomycetes	Eurotiales	Aspergillaceae	Aspergillus	Aspergillus terreus
	3		5	5	2	1	1	1	3	19	1		27	23	2		2	342097	species	uncultured soil eukaryote	Eukaryota	root	root	root	root	root	root	uncultured soil eukaryote
6	13	5	4	1	21	1	8	7	14	11	7	6	13	17		9	3	344612	no rank	Aspergillus clavatus NRRL 1	Eukaryota	Fungi	Ascomycota	Eurotiomycetes	Eurotiales	Aspergillaceae	Aspergillus	Aspergillus clavatus
10	15	2	4	2	14	2	9	2	25	20	16	11	25	26	4	5	5	348802	species	Exophiala xenobiotica	Eukaryota	Fungi	Ascomycota	Eurotiomycetes	Chaetothyriales	Herpotrichiellaceae	Exophiala	Exophiala xenobiotica
1	3	2	2	5	6		3	1	5	5	5	2	4	10	2			352472	no rank	Dictyostelium discoideum AX4	Eukaryota	root	root	root	Dictyosteliida	root	Dictyostelium	Dictyostelium discoideum
6	23	7	2	8	6		16	9					3					352914	no rank	Plasmodium yoelii yoelii 17XNL	Eukaryota	root	Apicomplexa	Aconoidasida	Haemosporida	Plasmodiidae	Plasmodium	Plasmodium yoelii
19	32	5	6	1	56				65	56	63	50	57	92		1		353027	species	Rhodotarzetta rosea	Eukaryota	Fungi	Ascomycota	Pezizomycetes	Pezizales	Pyronemataceae	Rhodotarzetta	Rhodotarzetta rosea
10	23	6	9	10	15	30	10	4	4	9	2	5	6	17	3	36	4	354276	species group	Enterobacter cloacae complex	Bacteria	root	Proteobacteria	Gammaproteobacteria	Enterobacteriales	Enterobacteriaceae	Enterobacter	root
2	15	6	9	9	14	13	9	6	6	21	11	18	29	12	4	10	5	358220	species	Acidovorax sp. KKS102	Bacteria	root	Proteobacteria	Betaproteobacteria	Burkholderiales	Comamonadaceae	Acidovorax	Acidovorax sp. KKS102
12	16	15	5	8	50	6	9	13	17	23	16	7	11	11	6	37	6	365659	no rank	Streptococcus mitis B6	Bacteria	root	Firmicutes	Bacilli	Lactobacillales	Streptococcaceae	Streptococcus	Streptococcus mitis
18	36	18	10	5	19	5	59	13	25	16	20	8	16	20	2	16	3	367110	no rank	Neurospora crassa OR74A	Eukaryota	Fungi	Ascomycota	Sordariomycetes	Sordariales	Sordariaceae	Neurospora	Neurospora crassa
5	6	2	6	5	23	1	2		6	3	4	3	10	11			1	367775	no rank	Cryptococcus gattii WM276	Eukaryota	Fungi	Basidiomycota	Tremellomycetes	Tremellales	Tremellaceae	Filobasidiella	Cryptococcus gattii
2	2	1	3	6	2	2	5	2	5	2	3		9	975	3	17	1	378753	no rank	Kocuria rhizophila DC2201	Bacteria	root	Actinobacteria	Actinobacteria	Micrococcales	Micrococcaceae	Kocuria	Kocuria rhizophila
4	10	2	6		9		11	1	22	13	9	9	16	14	2	4	1	383855	no rank	Pseudocercospora fijiensis CIRAD86	Eukaryota	Fungi	Ascomycota	Dothideomycetes	Capnodiales	Mycosphaerellaceae	Pseudocercospora	Pseudocercospora fijiensis
11	13	7	7	6	25	10	11	8	9	22	20	11	20	16	14	26	11	388919	no rank	Streptococcus sanguinis SK36	Bacteria	root	Firmicutes	Bacilli	Lactobacillales	Streptococcaceae	Streptococcus	Streptococcus sanguinis
4	2			2		1		3	1	8	10	1	13	5	1	2		391008	no rank	Stenotrophomonas maltophilia R551-3	Bacteria	root	Proteobacteria	Gammaproteobacteria	Xanthomonadales	Xanthomonadaceae	Stenotrophomonas	Stenotrophomonas maltophilia
	6					1	1			9		6	1	7		1		395010	species	Zasmidium cellare	Eukaryota	Fungi	Ascomycota	Dothideomycetes	Capnodiales	Mycosphaerellaceae	Zasmidium	Zasmidium cellare
7	6	1	2	3	1	6	4	1	1	5	3	1	15	15	1	10	2	399739	no rank	Pseudomonas mendocina ymp	Bacteria	root	Proteobacteria	Gammaproteobacteria	Pseudomonadales	Pseudomonadaceae	Pseudomonas	Pseudomonas mendocina
5	18	7	9	5	9	5	16	10	3	10	14	11	15	9	4	23	6	401472	species	Corynebacterium ureicelerivorans	Bacteria	root	Actinobacteria	Actinobacteria	Corynebacteriales	Corynebacteriaceae	Corynebacterium	Corynebacterium ureicelerivorans
1	2				1	2	1	3	6	4	3	2	3	5	3	10	5	402626	no rank	Ralstonia pickettii 12J	Bacteria	root	Proteobacteria	Betaproteobacteria	Burkholderiales	Burkholderiaceae	Ralstonia	Ralstonia pickettii
7	5	1	3	1	19		3	1	8	11	11	11	18	13		1		402676	no rank	Schizosaccharomyces japonicus yFS275	Eukaryota	Fungi	Ascomycota	Schizosaccharomycetes	Schizosaccharomycetales	Schizosaccharomycetaceae	Schizosaccharomyces	Schizosaccharomyces japonicus
46	183	425	67	60	56	3	2	53	45	74	116	6	709	8		3	4	403677	no rank	Phytophthora infestans T30-4	Eukaryota	root	root	Oomycetes	Peronosporales	root	Phytophthora	Phytophthora infestans
26	46	32	21	7	46		94	10	36	25	32	20	54	41	5	29	3	413071	no rank	Trichoderma virens Gv29-8	Eukaryota	Fungi	Ascomycota	Sordariomycetes	Hypocreales	Hypocreaceae	Trichoderma	Trichoderma virens
4	3			1	9		1		9	2	2	4	4	6				420778	species	Diplodia seriata	Eukaryota	Fungi	Ascomycota	Dothideomycetes	Botryosphaeriales	Botryosphaeriaceae	Diplodia	Diplodia seriata
	3		3		5		2		15	4	4	3	9	4	1			423536	no rank	Perkinsus marinus ATCC 50983	Eukaryota	root	root	root	Perkinsida	Perkinsidae	Perkinsus	Perkinsus marinus
6	6	1	5	2	1	1	1	5	2	6	2	2	7	1	3	6	2	424182	species	Rhizobium sp. IRBG74	Bacteria	root	Proteobacteria	Alphaproteobacteria	Rhizobiales	Rhizobiaceae	Rhizobium	Rhizobium sp. IRBG74
2	15	7	4		14	1	6	2	18	9	13	9	11	16		2		425011	no rank	Aspergillus niger CBS 513.88	Eukaryota	Fungi	Ascomycota	Eurotiomycetes	Eurotiales	Aspergillaceae	Aspergillus	Aspergillus niger
138	179	127	107	74	80	59	78	72	162	238	135	110	117	139	55	178	72	425265	no rank	Malassezia globosa CBS 7966	Eukaryota	Fungi	Basidiomycota	Malasseziomycetes	Malasseziales	Malasseziaceae	Malassezia	Malassezia globosa
	2	1	2		1	36	2	16	23	62	34	28	75	20	16	4	16	426355	no rank	Methylobacterium radiotolerans JCM 2831	Bacteria	root	Proteobacteria	Alphaproteobacteria	Rhizobiales	Methylobacteriaceae	Methylobacterium	Methylobacterium radiotolerans
	2	1		1		4		6	5	12	8	19	16	9	3	3	3	428406	no rank	Ralstonia pickettii 12D	Bacteria	root	Proteobacteria	Betaproteobacteria	Burkholderiales	Burkholderiaceae	Ralstonia	Ralstonia pickettii
	1		7	8					11	31	24		277					428695	species	Pythium sp. recalcitrans	Eukaryota	root	root	Oomycetes	Pythiales	Pythiaceae	Pythium	Pythium sp. recalcitrans
18	40	36	13	11	24		98	5	15	14	24	9	35	29	2	22	6	431241	no rank	Trichoderma reesei QM6a	Eukaryota	Fungi	Ascomycota	Sordariomycetes	Hypocreales	Hypocreaceae	Trichoderma	Trichoderma reesei
5	26	7	1		2	1	2				1	2		1		2		446468	no rank	Nocardiopsis dassonvillei subsp. dassonvillei DSM 43111	Bacteria	root	Actinobacteria	Actinobacteria	Streptosporangiales	Nocardiopsaceae	Nocardiopsis	Nocardiopsis dassonvillei
40	59	39	22	13	78	5	91	17	71	56	49	32	74	60	3	25	11	451864	subkingdom	Dikarya	Eukaryota	Fungi	root	root	root	root	root	root
2	3		1		1				9	5	6	1	8	9				451868	subclass	Pleosporomycetidae	Eukaryota	Fungi	Ascomycota	Dothideomycetes	root	root	root	root
5	3	1	2		8		2		7	10	3	8	8	12				451871	subclass	Eurotiomycetidae	Eukaryota	Fungi	Ascomycota	Eurotiomycetes	root	root	root	root
34	35	25	15	11	49	1	109	17	29	30	23	17	53	36	1	22	3	452589	no rank	Trichoderma atroviride IMI 206040	Eukaryota	Fungi	Ascomycota	Sordariomycetes	Hypocreales	Hypocreaceae	Trichoderma	Trichoderma atroviride
14	15	17	14	12	30		16		18	2	7	6	1					456999	species	Rhizoctonia solani	Eukaryota	Fungi	Basidiomycota	Agaricomycetes	Cantharellales	Ceratobasidiaceae	Rhizoctonia	Rhizoctonia solani
6	13	10	6	4	4	1	2		1	1	1	4	8	5	2	1	3	457428	no rank	Streptomyces lividans TK24	Bacteria	root	Actinobacteria	Actinobacteria	Streptomycetales	Streptomycetaceae	Streptomyces	Streptomyces lividans
	1	2		1	7		2		6	1	5	1	13	3	3	3	1	461836	no rank	Thecamonas trahens ATCC 50062	Eukaryota	root	root	root	root	Apusomonadidae	Thecamonas	Thecamonas trahens
1	8		2			1		1	14	2	10	1	1					469371	no rank	Thermobispora bispora DSM 43833	Bacteria	root	Actinobacteria	Actinobacteria	root	root	Thermobispora	Thermobispora bispora
3	7	7	2	2	1	1				1		8	6	2	1	2	1	477245	subspecies	Streptomyces cyaneogriseus subsp. noncyanogenus	Bacteria	root	Actinobacteria	Actinobacteria	Streptomycetales	Streptomycetaceae	Streptomyces	Streptomyces cyaneogriseus
2	20		2	2					16	12	22	3	3	1				479432	no rank	Streptosporangium roseum DSM 43021	Bacteria	root	Actinobacteria	Actinobacteria	Streptosporangiales	Streptosporangiaceae	Streptosporangium	Streptosporangium roseum
1	7		1	4	6		2	1			2	4	4	1		9		479435	no rank	Kribbella flavida DSM 17836	Bacteria	root	Actinobacteria	Actinobacteria	Propionibacteriales	Nocardioidaceae	Kribbella	Kribbella flavida
7	9	3	5	6	8	4	4	1	7	5	6	4	3	9	1	25	1	479436	no rank	Veillonella parvula DSM 2008	Bacteria	root	Firmicutes	Negativicutes	Veillonellales	Veillonellaceae	Veillonella	Veillonella parvula
2	10	2	4	2	23		1	1	9	12	15	8	15	19		2	1	483514	no rank	Schizosaccharomyces octosporus yFS286	Eukaryota	Fungi	Ascomycota	Schizosaccharomycetes	Schizosaccharomycetales	Schizosaccharomycetaceae	Schizosaccharomyces	Schizosaccharomyces octosporus
97	140	106	61	31	85	15	425	22	61	76	42	31	67	89	15	85	14	498257	no rank	Verticillium dahliae VdLs.17	Eukaryota	Fungi	Ascomycota	Sordariomycetes	Glomerellales	Plectosphaerellaceae	Verticillium	Verticillium dahliae
	4		5		1		6	3		2	2	5	4	5		3		500485	no rank	Penicillium rubens Wisconsin 54-1255	Eukaryota	Fungi	Ascomycota	Eurotiomycetes	Eurotiales	Aspergillaceae	Penicillium	Penicillium rubens
	4	1	1		1				21	12	7	1	1	1				502025	no rank	Haliangium ochraceum DSM 14365	Bacteria	root	Proteobacteria	Deltaproteobacteria	Myxococcales	Kofleriaceae	Haliangium	Haliangium ochraceum
6	17	1	8	1	29		8	4	37	25	23	14	18	35	1	1	1	502779	no rank	Paracoccidioides lutzii Pb01	Eukaryota	Fungi	Ascomycota	Eurotiomycetes	Onygenales	root	Paracoccidioides	Paracoccidioides lutzii
4	21	2	5		17	2	4	2	27	21	14	6	11	26			1	502780	no rank	Paracoccidioides brasiliensis Pb18	Eukaryota	Fungi	Ascomycota	Eurotiomycetes	Onygenales	root	Paracoccidioides	Paracoccidioides brasiliensis
6	7	5	2	3	14		4	1	21	15	12	9	7	21		1	2	510516	no rank	Aspergillus oryzae RIB40	Eukaryota	Fungi	Ascomycota	Eurotiomycetes	Eurotiales	Aspergillaceae	Aspergillus	Aspergillus oryzae
19	48	32	15	6	41	7	91	7	54	44	35	25	31	62		22	8	510951	no rank	Neurospora tetrasperma FGSC 2508	Eukaryota	Fungi	Ascomycota	Sordariomycetes	Sordariales	Sordariaceae	Neurospora	Neurospora tetrasperma
23	46	37	22	10	64	5	110	20	41	49	32	13	39	42	4	38	9	515849	no rank	Podospora anserina S mat+	Eukaryota	Fungi	Ascomycota	Sordariomycetes	Sordariales	Lasiosphaeriaceae	Podospora	Podospora anserina
	5		1	3	6	3	2	3		4	6	4	9	3	3	2	3	522373	no rank	Stenotrophomonas maltophilia K279a	Bacteria	root	Proteobacteria	Gammaproteobacteria	Xanthomonadales	Xanthomonadaceae	Stenotrophomonas	Stenotrophomonas maltophilia
36	52	57	31	9	39	18	197	6	21	33	20	6	21	28	5	43	6	526221	no rank	Verticillium alfalfae VaMs.102	Eukaryota	Fungi	Ascomycota	Sordariomycetes	Glomerellales	Plectosphaerellaceae	Verticillium	Verticillium alfalfae
7	18	9	7	10	3	5	5	7	8	13	11	2	13	12	6	24	7	526227	no rank	Meiothermus silvanus DSM 9946	Bacteria	root	Deinococcus-Thermus	Deinococci	Thermales	Thermaceae	Meiothermus	Meiothermus silvanus
2	11			1	1	3	2	3		11	4	7	5	7	4	1	2	535289	no rank	Acidovorax ebreus TPSY	Bacteria	root	Proteobacteria	Betaproteobacteria	Burkholderiales	Comamonadaceae	Acidovorax	Acidovorax ebreus
1	6	2	1	4	6		7		12	2	3	2	9	10	1	2	2	535722	no rank	Microsporum gypseum CBS 118893	Eukaryota	Fungi	Ascomycota	Eurotiomycetes	Onygenales	Arthrodermataceae	Microsporum	Microsporum gypseum
14	20	16	13	9	20	7	14	6	15	15	9	7	21	15	7	59	8	544580	species	Actinomyces oris	Bacteria	root	Actinobacteria	Actinobacteria	Actinomycetales	Actinomycetaceae	Actinomyces	Actinomyces oris
	1	3	2		2	10	2	1	2	6	2	2		5		5	2	546263	no rank	Neisseria elongata subsp. glycolytica ATCC 29315	Bacteria	root	Proteobacteria	Betaproteobacteria	Neisseriales	Neisseriaceae	Neisseria	Neisseria elongata
3	4	1	4	1	27	18	4	3	7	8	4	1	11	6		9	1	553174	no rank	Prevotella melaninogenica ATCC 25845	Bacteria	root	Bacteroidetes	Bacteroidia	Bacteroidales	Prevotellaceae	Prevotella	Prevotella melaninogenica
5	14	1	1		7		7	4	18	12	10	2	11	8	1	4	1	554155	no rank	Arthroderma otae CBS 113480	Eukaryota	Fungi	Ascomycota	Eurotiomycetes	Onygenales	Arthrodermataceae	Arthroderma	Arthroderma otae
	1		1	3	5		1			5	4	2	6	3	1	2		554915	no rank	Amoebozoa	Eukaryota	root	root	root	root	root	root	root
3	21	1	3	3	13	1	10	2	24	17	7	9	17	22		1		559298	no rank	Blastomyces gilchristii SLH14081	Eukaryota	Fungi	Ascomycota	Eurotiomycetes	Onygenales	Ajellomycetaceae	Blastomyces	Blastomyces gilchristii
39	84	43	21	11	73	7	172	23	69	68	52	37	72	84	5	41	3	563466	species	Scedosporium apiospermum	Eukaryota	Fungi	Ascomycota	Sordariomycetes	Microascales	Microascaceae	Scedosporium	Scedosporium apiospermum
7	7	2	1	1	11		3	1	10	6	5	4	12	10		1		566037	species	Saccharomycetaceae sp. 'Ashbya aceri'	Eukaryota	Fungi	Ascomycota	Saccharomycetes	Saccharomycetales	Saccharomycetaceae	root	Saccharomycetaceae sp. 'Ashbya aceri'
257	275	349	75	67	75	4	1423	47	71	66	78	33	109	73	11	24	4	569360	no rank	Fusarium sambucinum species complex	Eukaryota	Fungi	Ascomycota	Sordariomycetes	Hypocreales	Nectriaceae	Fusarium	root
2	11	6	7	1	15	3	8	3	18	20	18	15	13	11	1	3	2	569365	species	Cladophialophora immunda	Eukaryota	Fungi	Ascomycota	Eurotiomycetes	Chaetothyriales	Herpotrichiellaceae	Cladophialophora	Cladophialophora immunda
3	12	9	2		2	3	7	2	3	1	4	1	2	2		3		578455	no rank	Thielavia terrestris NRRL 8126	Eukaryota	Fungi	Ascomycota	Sordariomycetes	Sordariales	Chaetomiaceae	Thielavia	Thielavia terrestris
3	8	4	3	4	18	1			16	10	9	8	8	24	1	1		578456	no rank	Tremella mesenterica DSM 1558	Eukaryota	Fungi	Basidiomycota	Tremellomycetes	Tremellales	Tremellaceae	Tremella	Tremella mesenterica
7	6		2	2	22				10	4	9		4	7				578457	no rank	Serpula lacrymans var. lacrymans S7.9	Eukaryota	Fungi	Basidiomycota	Agaricomycetes	Boletales	Serpulaceae	Serpula	Serpula lacrymans
5	8	7	2	2	43	2	3	3	28	14	21	4	6	24	3	7	2	578458	no rank	Schizophyllum commune H4-8	Eukaryota	Fungi	Basidiomycota	Agaricomycetes	Agaricales	Schizophyllaceae	Schizophyllum	Schizophyllum commune
	16	1	45	62	94					42	5	20	28	42				588596	species	Rhizophagus irregularis	Eukaryota	Fungi	Glomeromycota	Glomeromycetes	Glomerales	Glomeraceae	Rhizophagus	Rhizophagus irregularis
	5	1	1	1	6	7	6	5	3	6	9	4	11	1	2	28	2	588932	species	Brevundimonas naejangsanensis	Bacteria	root	Proteobacteria	Alphaproteobacteria	Caulobacterales	Caulobacteraceae	Brevundimonas	Brevundimonas naejangsanensis
2	4	2	2	1	5		3		10	2	4	2	9	3	2	1	4	595528	no rank	Capsaspora owczarzaki ATCC 30864	Eukaryota	root	root	Ichthyosporea	root	root	Capsaspora	Capsaspora owczarzaki
2	2		3	2	23	2	1	3	10	7	12	3	3	15	1	2		599839	species	Fibroporia radiculosa	Eukaryota	Fungi	Basidiomycota	Agaricomycetes	Polyporales	Polyporaceae	Fibroporia	Fibroporia radiculosa
31	7		2	3	4	10	7	1	6	17	11	9	18	25	5	6	4	640081	no rank	Dechlorosoma suillum PS	Bacteria	root	Proteobacteria	Betaproteobacteria	Rhodocyclales	Rhodocyclaceae	Azospira	Azospira oryzae
20	68	34	28	12	38	5	128	23	53	77	42	43	42	69	3	43	12	644352	no rank	Gaeumannomyces graminis var. tritici R3-111a-1	Eukaryota	Fungi	Ascomycota	Sordariomycetes	Magnaporthales	Magnaporthaceae	Gaeumannomyces	Gaeumannomyces graminis
5	5	1	1			1	6			2				2		12		645127	no rank	Corynebacterium kroppenstedtii DSM 44385	Bacteria	root	Actinobacteria	Actinobacteria	Corynebacteriales	Corynebacteriaceae	Corynebacterium	Corynebacterium kroppenstedtii
5	9	8	4	1	4	1	31	1	1	5	11	3	4	3		13		645133	no rank	Colletotrichum graminicola M1.001	Eukaryota	Fungi	Ascomycota	Sordariomycetes	Glomerellales	Glomerellaceae	Colletotrichum	Colletotrichum graminicola
2	21	5	9	10	21		9	1	50	26	28	11	16	26	1	3	2	645134	no rank	Spizellomyces punctatus DAOM BR117	Eukaryota	Fungi	Chytridiomycota	Chytridiomycetes	Spizellomycetales	Spizellomycetaceae	Spizellomyces	Spizellomyces punctatus
4	3		1	2	26		3		11	2	4		6	8	3	1		650164	no rank	Phanerochaete carnosa HHB-10118-sp	Eukaryota	Fungi	Basidiomycota	Agaricomycetes	Polyporales	Phanerochaetaceae	Phanerochaete	Phanerochaete carnosa
3	8	1	3	3	6				9	5	11	5	4	11		3	1	653667	no rank	Schizosaccharomyces cryophilus OY26	Eukaryota	Fungi	Ascomycota	Schizosaccharomycetes	Schizosaccharomycetales	Schizosaccharomycetaceae	Schizosaccharomyces	Schizosaccharomyces cryophilus
31	50	28	27	10	37	3	115	13	46	41	30	17	59	50	4	34	2	655819	no rank	Beauveria bassiana ARSEF 2860	Eukaryota	Fungi	Ascomycota	Sordariomycetes	Hypocreales	Cordycipitaceae	Beauveria	Beauveria bassiana
13	13	7	8	2	19		34	5	11	10	9	5	19	18		4	1	655827	no rank	Metarhizium acridum CQMa 102	Eukaryota	Fungi	Ascomycota	Sordariomycetes	Hypocreales	Clavicipitaceae	Metarhizium	Metarhizium acridum
7	11	14	5	5	13		120	5	11	11	3	3	12	15	1	7	2	655844	no rank	Metarhizium robertsii ARSEF 23	Eukaryota	Fungi	Ascomycota	Sordariomycetes	Hypocreales	Clavicipitaceae	Metarhizium	Metarhizium robertsii
13	37	14	6	1	16	6	55	15	28	38	28	17	18	30	3	25	2	655863	no rank	Grosmannia clavigera kw1407	Eukaryota	Fungi	Ascomycota	Sordariomycetes	Ophiostomatales	Ophiostomataceae	Grosmannia	Grosmannia clavigera
34	49	11	21	7	69		9	1	141	98	86	54	62	155	1	1	2	656061	no rank	Tuber melanosporum Mel28	Eukaryota	Fungi	Ascomycota	Pezizomycetes	Pezizales	Tuberaceae	Tuber	Tuber melanosporum
	2	1	13	99	31					6	2	7	56	49				658196	species	Glomus cerebriforme	Eukaryota	Fungi	Glomeromycota	Glomeromycetes	Glomerales	Glomeraceae	Glomus	Glomus cerebriforme
3	5	3	3	2	10		4		10	6	5	6	4	14	1	1		658429	no rank	Pseudogymnoascus destructans 20631-21	Eukaryota	Fungi	Ascomycota	Leotiomycetes	root	Pseudeurotiaceae	Pseudogymnoascus	Pseudogymnoascus destructans
261	577	1697	94	89	162	5	868	35	93	87	84	28	191	49	7	29	4	660122	no rank	Nectria haematococca mpVI 77-13-4	Eukaryota	Fungi	Ascomycota	Sordariomycetes	Hypocreales	Nectriaceae	Fusarium	Nectria haematococca
18	45	17	8	10	25	13	21	11	26	16	29	38	23	33	1	16	34	665024	no rank	Bipolaris maydis ATCC 48331	Eukaryota	Fungi	Ascomycota	Dothideomycetes	Pleosporales	Pleosporaceae	Bipolaris	Bipolaris maydis
8	11	3	3	3	14	1	5	1	21	20	14	14	19	22	1	1	3	665079	no rank	Sclerotinia sclerotiorum 1980 UF-70	Eukaryota	Fungi	Ascomycota	Leotiomycetes	Helotiales	Sclerotiniaceae	Sclerotinia	Sclerotinia sclerotiorum
6	16	9	6	7	15	7	11	3	15	9	6	35	15	11	3	7	19	665912	no rank	Bipolaris sorokiniana ND90Pr	Eukaryota	Fungi	Ascomycota	Dothideomycetes	Pleosporales	Pleosporaceae	Bipolaris	Bipolaris sorokiniana
	4	1	1	2	4		3		5	3	4	2	10	5	1	2	2	667725	no rank	Sphaeroforma arctica JP610	Eukaryota	root	root	Ichthyosporea	Ichthyophonida	root	Sphaeroforma	Sphaeroforma arctica
8	5	4	3	1	32	3	1		9	1	9	6	5	17	1	2	1	670483	no rank	Gloeophyllum trabeum ATCC 11539	Eukaryota	Fungi	Basidiomycota	Agaricomycetes	Gloeophyllales	Gloeophyllaceae	Gloeophyllum	Gloeophyllum trabeum
2	4		3	3	8				2	3	4	3	7	5		1	1	671144	no rank	Wallemia mellicola CBS 633.66	Eukaryota	Fungi	Basidiomycota	Wallemiomycetes	Wallemiales	root	Wallemia	Wallemia mellicola
24	48	17	7	5	17	15	11	11	24	23	27	15	20	30	3	14	36	671987	no rank	Setosphaeria turcica Et28A	Eukaryota	Fungi	Ascomycota	Dothideomycetes	Pleosporales	Pleosporaceae	Setosphaeria	Setosphaeria turcica
21	146	70	56	40	14	8	2	1	10	5	24	35	34	9	1	19	10	680198	no rank	Streptomyces scabiei 87.22	Bacteria	root	Actinobacteria	Actinobacteria	Streptomycetales	Streptomycetaceae	Streptomyces	Streptomyces scabiei
26	31	10	9	15	35	55	34	5	17	15	15	8	27	28	8	51	9	680646	no rank	Rothia mucilaginosa DY-18	Bacteria	root	Actinobacteria	Actinobacteria	Micrococcales	Micrococcaceae	Rothia	Rothia mucilaginosa
1	8		1	3	15				23	5	5	9	15	13				684364	no rank	Batrachochytrium dendrobatidis JAM81	Eukaryota	Fungi	Chytridiomycota	Chytridiomycetes	Rhizophydiales	root	Batrachochytrium	Batrachochytrium dendrobatidis
9	49	5	7	11	31	4		1	45	38	25	11	24	28		3	1	688394	species	Lichtheimia ramosa	Eukaryota	Fungi	root	root	Mucorales	Lichtheimiaceae	Lichtheimia	Lichtheimia ramosa
	4	3	2	1	2				7	7	8	5	8	3	2	5	1	691883	species	Fonticula alba	Eukaryota	root	root	root	root	root	Fonticula	Fonticula alba
17	36	18	7	6	41	3	26	4	66	37	50	30	46	69	1	13	6	692275	no rank	Sphaerulina musiva SO2202	Eukaryota	Fungi	Ascomycota	Dothideomycetes	Capnodiales	Mycosphaerellaceae	Sphaerulina	Sphaerulina musiva
2	7	2	5	3	29			2	20	13	19	7	10	20	3	1		694068	no rank	Fomitiporia mediterranea MF3/22	Eukaryota	Fungi	Basidiomycota	Agaricomycetes	Hymenochaetales	Hymenochaetaceae	Fomitiporia	Fomitiporia mediterranea
2	13	5	29	10	4		2		39	43	69	3	412	7	2	1	1	695850	no rank	Saprolegnia parasitica CBS 223.65	Eukaryota	root	root	Oomycetes	Saprolegniales	Saprolegniaceae	Saprolegnia	Saprolegnia parasitica
3	1	2	3		6				3	3	4	7	2	12				708197	species	Colletotrichum tofieldiae	Eukaryota	Fungi	Ascomycota	Sordariomycetes	Glomerellales	Glomerellaceae	Colletotrichum	Colletotrichum tofieldiae
10	11	5	2	3	19	73	10	6	6	22	8	6	15	16	5	16	5	712633	species	Streptococcus sp. oral taxon 431	Bacteria	root	Firmicutes	Bacilli	Lactobacillales	Streptococcaceae	Streptococcus	Streptococcus sp. oral taxon 431
				1	2	2	7		2	2	4		2	16	3	13		712898	no rank	Pantoea vagans C9-1	Bacteria	root	Proteobacteria	Gammaproteobacteria	Enterobacteriales	Enterobacteriaceae	Pantoea	Pantoea vagans
2			1		2				7	5	4	2	7	2				714895	species	Hysterium vermiforme	Eukaryota	Fungi	Ascomycota	Dothideomycetes	Hysteriales	Hysteriaceae	Hysterium	Hysterium vermiforme
11	31	7	3	4	8	3	10	2	9	3	6	6	6	9		7	29	715340	suborder	Pleosporineae	Eukaryota	Fungi	Ascomycota	Dothideomycetes	Pleosporales	root	root	root
12	6	9	3	1	9	1	31	1	9	9	8	4	5	13	2	1	1	715989	no rank	sordariomyceta	Eukaryota	Fungi	Ascomycota	root	root	root	root	root
12	12	6	7	5	16	2	28	5	28	24	19	9	20	27	1	2	2	716545	no rank	saccharomyceta	Eukaryota	Fungi	Ascomycota	root	root	root	root	root
145	222	162	84	53	232	21	604	61	243	210	194	101	227	292	15	123	40	716546	no rank	leotiomyceta	Eukaryota	Fungi	Ascomycota	root	root	root	root	root
6	7	2	3		6		7	3	9	7	3	1	13	5		6	1	717646	no rank	Baudoinia panamericana UAMH 10762	Eukaryota	Fungi	Ascomycota	Dothideomycetes	Capnodiales	Teratosphaeriaceae	Baudoinia	Baudoinia panamericana
2	7	1	2	2	25	5	5		3	8	7	3	5	11	1	5	2	717944	no rank	Trametes versicolor FP-101664 SS1	Eukaryota	Fungi	Basidiomycota	Agaricomycetes	Polyporales	Coriolaceae	Trametes	Trametes versicolor
3	1			2	22		5		8	5	7	5	1	6		1	1	717982	no rank	Auricularia subglabra TFB-10046 SS5	Eukaryota	Fungi	Basidiomycota	Agaricomycetes	Auriculariales	Auriculariaceae	Auricularia	Auricularia subglabra
2	6	2	2	2	47		2	1	14	6	13	9	8	15	1	3	1	721885	no rank	Stereum hirsutum FP-91666 SS1	Eukaryota	Fungi	Basidiomycota	Agaricomycetes	Russulales	Stereaceae	Stereum	Stereum hirsutum
5	7	5		2	37	2	1		8	7	5	4	6	10	2	1		732165	no rank	Dichomitus squalens LYAD-421 SS1	Eukaryota	Fungi	Basidiomycota	Agaricomycetes	Polyporales	Polyporaceae	Dichomitus	Dichomitus squalens
2	2		1	1	31		1	1	14	3	9	1	1	8	2	1	1	741275	no rank	Punctularia strigosozonata HHB-11173 SS5	Eukaryota	Fungi	Basidiomycota	Agaricomycetes	Corticiales	Punctulariaceae	Punctularia	Punctularia strigosozonata
6	3	1	2	2	29		2	2	13	6	6	2	7	8	2	1	1	741705	no rank	Coniophora puteana RWD-64-598 SS2	Eukaryota	Fungi	Basidiomycota	Agaricomycetes	Boletales	Coniophoraceae	Coniophora	Coniophora puteana
1	1		1		8				6	2	5	6	1	5		3	2	746128	species	Aspergillus fumigatus	Eukaryota	Fungi	Ascomycota	Eurotiomycetes	Eurotiales	Aspergillaceae	Aspergillus	Aspergillus fumigatus
10	9	2	2	3	57		3	2	23	25	19	11	11	21	3	5	1	747525	no rank	Heterobasidion irregulare TC 32-1	Eukaryota	Fungi	Basidiomycota	Agaricomycetes	Russulales	Bondarzewiaceae	Heterobasidion	Heterobasidion irregulare
	5	2	5	5	8		1	1	10	10	12	4	7	8	1			747676	no rank	Melampsora larici-populina 98AG31	Eukaryota	Fungi	Basidiomycota	Pucciniomycetes	Pucciniales	Melampsoraceae	Melampsora	Melampsora larici-populina
14	29	10	9	6	41		8	2	61	42	46	26	35	47	1	2		756982	no rank	Arthrobotrys oligospora ATCC 24927	Eukaryota	Fungi	Ascomycota	Orbiliomycetes	Orbiliales	Orbiliaceae	Orbilia	Arthrobotrys oligospora
6	27	12	11	6	19	2	41	8	30	28	28	15	24	27		14	3	759272	no rank	Chaetomium thermophilum var. thermophilum DSM 1495	Eukaryota	Fungi	Ascomycota	Sordariomycetes	Sordariales	Chaetomiaceae	Chaetomium	Chaetomium thermophilum
3789	19432	37814	2875	1884	4798	1	14	4960	238	513	188	111	1036	15	3	20	4	761204	no rank	Phytophthora parasitica INRA-310	Eukaryota	root	root	Oomycetes	Peronosporales	root	Phytophthora	Phytophthora parasitica
6	16	17	6	4	25	3	9	6	6	12	15	9	21	17	11	22	5	762948	no rank	Rothia dentocariosa ATCC 17931	Bacteria	root	Actinobacteria	Actinobacteria	Micrococcales	Micrococcaceae	Rothia	Rothia dentocariosa
2	4	1	1	2	2		1		8	7	7	5	7	5		1		764103	no rank	Mixia osmundae IAM 14324	Eukaryota	Fungi	Basidiomycota	Mixiomycetes	Mixiales	Mixiaceae	Mixia	Mixia osmundae
6	4	7			5	1	18	2	1	4	2	1	4	1		1	1	771870	no rank	Sordaria macrospora k-hell	Eukaryota	Fungi	Ascomycota	Sordariomycetes	Sordariales	Sordariaceae	Sordaria	Sordaria macrospora
13	21	7	6	4	34	2	4	3	46	31	37	20	43	56	2	3	2	796027	species	Sugiyamaella lignohabitans	Eukaryota	Fungi	Ascomycota	Saccharomycetes	Saccharomycetales	Trichomonascaceae	Sugiyamaella	Sugiyamaella lignohabitans
				9					2				5	10				839843	species	uncultured Glomerales	Eukaryota	Fungi	Glomeromycota	Glomeromycetes	Glomerales	Glomeraceae	root	uncultured Glomerales
3	12	2	7	6	24	1	6	2	28	21	26	21	25	36		4	2	858893	no rank	Exophiala dermatitidis NIH/UT8656	Eukaryota	Fungi	Ascomycota	Eurotiomycetes	Chaetothyriales	Herpotrichiellaceae	Exophiala	Exophiala dermatitidis
27	24	20	49	34	273	48	36	14	20	30	29	13	49	25	13	80	15	862965	no rank	Haemophilus parainfluenzae T3T1	Bacteria	root	Proteobacteria	Gammaproteobacteria	Pasteurellales	Pasteurellaceae	Haemophilus	Haemophilus parainfluenzae
3	8	1	4	6	3	4	4	2	4	6		10	9	3	4	9	3	879274	species	Shinella sp. HZN7	Bacteria	root	Proteobacteria	Alphaproteobacteria	Rhizobiales	Rhizobiaceae	Shinella	Shinella sp. HZN7
3	4	4		2	3	7	3	3	10	14	3	3	15	6	4	15	4	909768	species group	Acinetobacter calcoaceticus/baumannii complex	Bacteria	root	Proteobacteria	Gammaproteobacteria	Pseudomonadales	Moraxellaceae	Acinetobacter	root
5	9	4	3	2	13	4	9	1	4	5	6		5	4	2	13	1	927666	no rank	Streptococcus oralis Uo5	Bacteria	root	Firmicutes	Bacilli	Lactobacillales	Streptococcaceae	Streptococcus	Streptococcus oralis
5	5	3	3	2	8	3	4	1	9	8	9	11	4	9		4	10	930089	no rank	Bipolaris zeicola 26-R-13	Eukaryota	Fungi	Ascomycota	Dothideomycetes	Pleosporales	Pleosporaceae	Bipolaris	Bipolaris zeicola
8	13	7	9	6	16	6	13	4	11	4	10	33	13	24		4	9	930090	no rank	Bipolaris oryzae ATCC 44560	Eukaryota	Fungi	Ascomycota	Dothideomycetes	Pleosporales	Pleosporaceae	Bipolaris	Bipolaris oryzae
20	21	9	6	3	10	4	11	1	9	9	11	21	22	9		5	12	930091	no rank	Bipolaris victoriae FI3	Eukaryota	Fungi	Ascomycota	Dothideomycetes	Pleosporales	Pleosporaceae	Bipolaris	Bipolaris victoriae
			1	15	5						1	11	8	3				937382	species	Claroideoglomus etunicatum	Eukaryota	Fungi	Glomeromycota	Glomeromycetes	Glomerales	Claroideoglomeraceae	Claroideoglomus	Claroideoglomus etunicatum
5	10	5		2			41	2	1	1	4			2				948311	species	Fusarium proliferatum	Eukaryota	Fungi	Ascomycota	Sordariomycetes	Hypocreales	Nectriaceae	Fusarium	Fusarium proliferatum
15	33	15	12	5	20	8	85	6	14	26	9	11	24	22	4	22	3	983644	no rank	Cordyceps militaris CM01	Eukaryota	Fungi	Ascomycota	Sordariomycetes	Hypocreales	Cordycipitaceae	Cordyceps	Cordyceps militaris
16	32	9	4	4	15	3	8	3	31	15	21	7	24	22	1	6	36	985895	no rank	Leptosphaeria maculans JN3	Eukaryota	Fungi	Ascomycota	Dothideomycetes	Pleosporales	Leptosphaeriaceae	Leptosphaeria	Leptosphaeria maculans
6	8	16	6	2	5	3	53	4	1	11	3	5	3	10	3	12	1	1028384	order	Glomerellales	Eukaryota	Fungi	Ascomycota	Sordariomycetes	Glomerellales	root	root	root
	1				1			15		1		7	12	8		6		1028423	family	Ceratocystidaceae	Eukaryota	Fungi	Ascomycota	Sordariomycetes	Microascales	Ceratocystidaceae	root	root
141	127	191	33	25	27	3	893	14	34	15	45	19	54	33	10	13	3	1028729	no rank	Fusarium pseudograminearum CS3096	Eukaryota	Fungi	Ascomycota	Sordariomycetes	Hypocreales	Nectriaceae	Fusarium	Fusarium pseudograminearum
48	85	54	38	19	53	12	285	13	18	49	24	5	27	39	8	57	10	1036719	genus	Verticillium	Eukaryota	Fungi	Ascomycota	Sordariomycetes	Glomerellales	Plectosphaerellaceae	Verticillium	root
3	3	2		3	7		3		14	7	12	1	6	7		1	1	1037660	no rank	Tilletiaria anomala UBC 951	Eukaryota	Fungi	Basidiomycota	Exobasidiomycetes	Georgefischeriales	Tilletiariaceae	Tilletiaria	Tilletiaria anomala
	3		1	8	16			1	2	1	3		3	6	1	1		1041607	species	Wickerhamomyces ciferrii	Eukaryota	Fungi	Ascomycota	Saccharomycetes	Saccharomycetales	Phaffomycetaceae	Wickerhamomyces	Wickerhamomyces ciferrii
10	16	5	5	6	12	2	21	7	17	10	11	5	22	21	3	7	5	1043004	no rank	Aureobasidium namibiae CBS 147.97	Eukaryota	Fungi	Ascomycota	Dothideomycetes	Dothideales	Aureobasidiaceae	Aureobasidium	Aureobasidium namibiae
10	20	12	10	2	19	6	36	9	30	23	9	11	19	20		19	6	1043005	no rank	Aureobasidium subglaciale EXF-2481	Eukaryota	Fungi	Ascomycota	Dothideomycetes	Dothideales	Aureobasidiaceae	Aureobasidium	Aureobasidium subglaciale
4	10	2	2	8	24	4	4	3	14	4	10	3	5	3	6	15	4	1054460	no rank	Streptococcus pseudopneumoniae IS7493	Bacteria	root	Firmicutes	Bacilli	Lactobacillales	Streptococcaceae	Streptococcus	Streptococcus pseudopneumoniae
	1		1	6	12					2			6	2				1069680	no rank	Pneumocystis murina B123	Eukaryota	Fungi	Ascomycota	Pneumocystidomycetes	Pneumocystidales	Pneumocystidaceae	Pneumocystis	Pneumocystis murina
	2			3	5				5	5				6	1			1071382	no rank	Kazachstania africana CBS 2517	Eukaryota	Fungi	Ascomycota	Saccharomycetes	Saccharomycetales	Saccharomycetaceae	Kazachstania	Kazachstania africana
13	23	2	10	4	40	2	14	5	40	38	36	23	38	48	1	3	1	1072389	no rank	Marssonina brunnea f. sp. 'multigermtubi' MB_m1	Eukaryota	Fungi	Ascomycota	Leotiomycetes	Helotiales	Dermateaceae	Marssonina	Marssonina brunnea
1		1	1	5	1	1	3	1	4	7	1	4	3	2	6	5	4	1112204	no rank	Gordonia polyisoprenivorans VH2	Bacteria	root	Actinobacteria	Actinobacteria	Corynebacteriales	Gordoniaceae	Gordonia	Gordonia polyisoprenivorans
8	18	3	7	3	23		6	4	34	14	16	16	19	40	1	2	4	1116229	no rank	Glarea lozoyensis ATCC 20868	Eukaryota	Fungi	Ascomycota	Leotiomycetes	Helotiales	Helotiaceae	Glarea	Glarea lozoyensis
			11	28	12					4	2	3	14	17			1	1117308	genus	Funneliformis	Eukaryota	Fungi	Glomeromycota	Glomeromycetes	Glomerales	Glomeraceae	Funneliformis	root
1	17		33	53	56					34	3	17	22	23				1129544	genus	Rhizophagus	Eukaryota	Fungi	Glomeromycota	Glomeromycetes	Glomerales	Glomeraceae	Rhizophagus	root
			1	22	5						1		20	8				1129545	genus	Claroideoglomus	Eukaryota	Fungi	Glomeromycota	Glomeromycetes	Glomerales	Claroideoglomeraceae	Claroideoglomus	root
5	10	2	1	1	17		4		16	13	11	2	7	10	1	5		1130832	no rank	Rhodotorula toruloides NP11	Eukaryota	Fungi	Basidiomycota	Microbotryomycetes	Sporidiobolales	Sporidiobolaceae	Rhodotorula	Rhodotorula toruloides
2	1	2	4	1	3		3	1	4	10	3	1	11	9		1		1131492	family	Aspergillaceae	Eukaryota	Fungi	Ascomycota	Eurotiomycetes	Eurotiales	Aspergillaceae	root	root
6	22	9	29	10	8	3	3	1	39	53	64	1	402	6		1	2	1156394	no rank	Saprolegnia diclina VS20	Eukaryota	root	root	Oomycetes	Saprolegniales	Saprolegniaceae	Saprolegnia	Saprolegnia diclina
1	3		1	2	3	14	3	2	2	5	2	2	6	3	2	2	2	1156431	species	Streptococcus sp. I-G2	Bacteria	root	Firmicutes	Bacilli	Lactobacillales	Streptococcaceae	Streptococcus	Streptococcus sp. I-G2
6	11	8	1			2					2	2		1	3			1156913	no rank	Amycolatopsis orientalis HCCB10007	Bacteria	root	Actinobacteria	Actinobacteria	Pseudonocardiales	Pseudonocardiaceae	Amycolatopsis	Amycolatopsis orientalis
5	10	2	4	3	4	11	11	5	4	7	6	9	8	9		7		1167641	species	Sphingomonas sp. NIC1	Bacteria	root	Proteobacteria	Alphaproteobacteria	Sphingomonadales	Sphingomonadaceae	Sphingomonas	Sphingomonas sp. NIC1
23	29	17	4	4	30	9	22	2	53	44	40	15	31	34	1	15	7	1168221	no rank	Coniosporium apollinis CBS 100218	Eukaryota	Fungi	Ascomycota	Eurotiomycetes	Chaetothyriales	Herpotrichiellaceae	Coniosporium	Coniosporium apollinis
14	19	9	9	1	32	1	32	3	34	27	31	23	27	31	2	9	1	1170230	no rank	Penicillium digitatum Pd1	Eukaryota	Fungi	Ascomycota	Eurotiomycetes	Eurotiales	Aspergillaceae	Penicillium	Penicillium digitatum
2	4	2		1	4	4	3	2	10	6	3	2	7	2	2	3	1	1170318	no rank	Propionibacterium avidum 44067	Bacteria	root	Actinobacteria	Actinobacteria	Propionibacteriales	Propionibacteriaceae	Propionibacterium	Propionibacterium avidum
11	31	11	3	16	3			1	2	1	3	32	34	9	6	1	8	1179773	no rank	Saccharothrix espanaensis DSM 44229	Bacteria	root	Actinobacteria	Actinobacteria	Pseudonocardiales	Pseudonocardiaceae	Saccharothrix	Saccharothrix espanaensis
2	11	2	6	2	8		4	1	9	12	12	5	8	12	1		2	1182541	no rank	Capronia coronata CBS 617.96	Eukaryota	Fungi	Ascomycota	Eurotiomycetes	Chaetothyriales	Herpotrichiellaceae	Capronia	Capronia coronata
6	7	2	2		18	1	6		24	17	7	5	16	22		2		1182542	no rank	Capronia epimyces CBS 606.96	Eukaryota	Fungi	Ascomycota	Eurotiomycetes	Chaetothyriales	Herpotrichiellaceae	Capronia	Capronia epimyces
3	8	1	2	1	10		2		15	15	11	7	6	19				1182543	no rank	Cladophialophora psammophila CBS 110553	Eukaryota	Fungi	Ascomycota	Eurotiomycetes	Chaetothyriales	Herpotrichiellaceae	Cladophialophora	Cladophialophora psammophila
	6	1	2		7	2	2	1	5	8	10	2	21	17		1	1	1182544	no rank	Cladophialophora yegresii CBS 114405	Eukaryota	Fungi	Ascomycota	Eurotiomycetes	Chaetothyriales	Herpotrichiellaceae	Cladophialophora	Cladophialophora yegresii
8	25	5	16	5	34	3	4	3	36	22	18	18	14	23	2	4	3	1182545	no rank	Exophiala aquamarina CBS 119918	Eukaryota	Fungi	Ascomycota	Eurotiomycetes	Chaetothyriales	Herpotrichiellaceae	Exophiala	Exophiala aquamarina
6	9	5	2	1	34		8	2	12	5	9	5	12	11	2		3	1186058	no rank	Trichosporon asahii var. asahii CBS 2479	Eukaryota	Fungi	Basidiomycota	Tremellomycetes	Trichosporonales	Trichosporonaceae	Trichosporon	Trichosporon asahii
21	21	12	14	17	18	10	19	3	9	21	6	10	17	2	6	24	7	1194526	no rank	Staphylococcus warneri SG1	Bacteria	root	Firmicutes	Bacilli	Bacillales	Staphylococcaceae	Staphylococcus	Staphylococcus warneri
35	72	43	18	15	52	11	165	14	32	30	30	14	16	44	8	47	6	1202531	no rank	Verticillium dahliae JR2	Eukaryota	Fungi	Ascomycota	Sordariomycetes	Glomerellales	Plectosphaerellaceae	Verticillium	Verticillium dahliae
	5		2		14	14	1	3	6	12	7	10	14	9	5	22	4	1208104	no rank	Aeromonas media WS	Bacteria	root	Proteobacteria	Gammaproteobacteria	Aeromonadales	Aeromonadaceae	Aeromonas	Aeromonas media
4	14	1	4	3	12	5	5	3	3	56	10	3	5	2	2	24		1211579	no rank	Pseudomonas putida NBRC 14164	Bacteria	root	Proteobacteria	Gammaproteobacteria	Pseudomonadales	Pseudomonadaceae	Pseudomonas	Pseudomonas putida
24	57	46	23	14	50	6	184	121	26	46	37	17	43	43	7	44	8	1213859	no rank	Colletotrichum gloeosporioides Nara gc5	Eukaryota	Fungi	Ascomycota	Sordariomycetes	Glomerellales	Glomerellaceae	Colletotrichum	Colletotrichum gloeosporioides
4	31	28	14	11	19	1		3	2		6	18	15	3	5	5	3	1214101	no rank	Streptomyces davawensis JCM 4913	Bacteria	root	Actinobacteria	Actinobacteria	Streptomycetales	Streptomycetaceae	Streptomyces	Streptomyces davawensis
1	11	8	4	4	5						1	3	3	1	1			1214242	no rank	Streptomyces collinus Tu 365	Bacteria	root	Actinobacteria	Actinobacteria	Streptomycetales	Streptomycetaceae	Streptomyces	Streptomyces collinus
9	21	13	5	2	22	1	18	7	31	14	21	12	21	18	2	5	1	1220924	no rank	Cyphellophora europaea CBS 101466	Eukaryota	Fungi	Ascomycota	Eurotiomycetes	Chaetothyriales	Cyphellophoraceae	Cyphellophora	Cyphellophora europaea
8	16	2	2	1	2	3	1	2	1	8	4	4	3	19	2	13	1	1225174	no rank	Pseudomonas mendocina S5.2	Bacteria	root	Proteobacteria	Gammaproteobacteria	Pseudomonadales	Pseudomonadaceae	Pseudomonas	Pseudomonas mendocina
16	18	18	6	4	20	4	86	9	15	16	11	13	27	18	1	21	1	1229662	no rank	Pestalotiopsis fici W106-1	Eukaryota	Fungi	Ascomycota	Sordariomycetes	Xylariales	Sporocadaceae	Pestalotiopsis	Pestalotiopsis fici
	3	1	2	2	14	2	2	7	5	13	4	1	12	4	4	40	3	1229758	no rank	Leuconostoc carnosum JB16	Bacteria	root	Firmicutes	Bacilli	Lactobacillales	Leuconostocaceae	Leuconostoc	Leuconostoc carnosum
20	33	24	10	19	9	4	9	11	11	11	29	12	12	13	9	16	7	1230383	no rank	Malassezia sympodialis ATCC 42132	Eukaryota	Fungi	Basidiomycota	Malasseziomycetes	Malasseziales	Malasseziaceae	Malassezia	Malassezia sympodialis
	6	1		1					8	9	8							1240132	species	Nocardiopsaceae bacterium 41535	Bacteria	root	Actinobacteria	Actinobacteria	Streptosporangiales	Nocardiopsaceae	root	Nocardiopsaceae bacterium 41535
380	312	186	138	150	286	452	218	111	158	405	294	132	299	821	108	1144	119	1242245	no rank	Acinetobacter johnsonii XBB1	Bacteria	root	Proteobacteria	Gammaproteobacteria	Pseudomonadales	Moraxellaceae	Acinetobacter	Acinetobacter johnsonii
22	220	46	27	10	15		4	1	28	29	70	18	14	27	1	5	1	1257118	no rank	Acanthamoeba castellanii str. Neff	Eukaryota	root	root	root	Longamoebia	root	Acanthamoeba	Acanthamoeba castellanii
1	1	3	1	1	7	2	3	1	8	7	5	4	8	6			3	1263415	no rank	Endocarpon pusillum Z07020	Eukaryota	Fungi	Ascomycota	Eurotiomycetes	Verrucariales	Verrucariaceae	Endocarpon	Endocarpon pusillum
28	28	8	18	9	13	39	20	27	28	75	36	29	97	50	21	37	29	1267562	no rank	Cupriavidus gilardii CR3	Bacteria	root	Proteobacteria	Betaproteobacteria	Burkholderiales	Burkholderiaceae	Cupriavidus	Cupriavidus gilardii
4	4	2	5	4	7		24	3	7	5	6	1	7	6		4		1276141	no rank	Metarhizium brunneum ARSEF 3297	Eukaryota	Fungi	Ascomycota	Sordariomycetes	Hypocreales	Clavicipitaceae	Metarhizium	Metarhizium brunneum
13	15	10	7	1	14		18	2	11	14	9	5	16	8	1	4		1276143	no rank	Metarhizium majus ARSEF 297	Eukaryota	Fungi	Ascomycota	Sordariomycetes	Hypocreales	Clavicipitaceae	Metarhizium	Metarhizium majus
2	4	1	1		6	1	1		2	3	4	4	9	4	1	8	3	1276282	no rank	Staphylococcus pasteuri SP1	Bacteria	root	Firmicutes	Bacilli	Bacillales	Staphylococcaceae	Staphylococcus	Staphylococcus pasteuri
2	3	2			11		4		7	1	7	3	8	7	1	3		1277687	no rank	Anthracocystis flocculosa PF-1	Eukaryota	Fungi	Basidiomycota	Ustilaginomycetes	Ustilaginales	Ustilaginaceae	Anthracocystis	Anthracocystis flocculosa
11	15	6	6	2	31	1	9		41	30	21	18	36	36	1	9	3	1279043	no rank	Cladophialophora carrionii CBS 160.54	Eukaryota	Fungi	Ascomycota	Eurotiomycetes	Chaetothyriales	Herpotrichiellaceae	Cladophialophora	Cladophialophora carrionii
6913	5412	6723	1151	1459	896	20	45865	910	690	293	1134	123	189	80	200	57	7	1279085	no rank	Fusarium fujikuroi IMI 58289	Eukaryota	Fungi	Ascomycota	Sordariomycetes	Hypocreales	Nectriaceae	Fusarium	Fusarium fujikuroi
	2		1	1		4	2	3	2	14	11	1	17	2	4	1	1	1283291	species	Pseudomonas sp. URMO17WK12:I11	Bacteria	root	Proteobacteria	Gammaproteobacteria	Pseudomonadales	Pseudomonadaceae	Pseudomonas	Pseudomonas sp. URMO17WK12:I11
12	21	6	6	6	37		11		52	38	23	26	36	40		3	4	1284197	no rank	Dactylellina haptotyla CBS 200.50	Eukaryota	Fungi	Ascomycota	Orbiliomycetes	Orbiliales	Orbiliaceae	Dactylellina	Dactylellina haptotyla
16	40	27	22	7	20	3	75	9	23	32	22	14	45	32	5	28	6	1286976	no rank	Phaeoacremonium minimum UCRPA7	Eukaryota	Fungi	Ascomycota	Sordariomycetes	Togniniales	Togniniaceae	Phaeoacremonium	Phaeoacremonium minimum
13	20	9	3	5	22	3	44	4	21	15	8	8	17	17	3	15	7	1287680	no rank	Neofusicoccum parvum UCRNP2	Eukaryota	Fungi	Ascomycota	Dothideomycetes	Botryosphaeriales	Botryosphaeriaceae	Neofusicoccum	Neofusicoccum parvum
15	25	20	6	1	12	3	49	7	24	18	10	8	27	20	3	8	4	1287681	no rank	Eutypa lata UCREL1	Eukaryota	Fungi	Ascomycota	Sordariomycetes	Xylariales	Diatrypaceae	Eutypa	Eutypa lata
1	7	2	1		1	3	2	1	3	9	2	2	4		2	7		1296619	no rank	Staphylococcus capitis CR01	Bacteria	root	Firmicutes	Bacilli	Bacillales	Staphylococcaceae	Staphylococcus	Staphylococcus capitis
1	1	1			6			1	13	10	13	4	3	9				1299270	no rank	Wallemia ichthyophaga EXF-994	Eukaryota	Fungi	Basidiomycota	Wallemiomycetes	Wallemiales	root	Wallemia	Wallemia ichthyophaga
1	6	5	5	2	3	4	2	2			1	3	2	2	4	4	3	1300347	no rank	Nocardioides dokdonensis FR1436	Bacteria	root	Actinobacteria	Actinobacteria	Propionibacteriales	Nocardioidaceae	Nocardioides	Nocardioides dokdonensis
2	1	1	1	1	3		3		1	3	1	4	6	4	1	5	5	1302863	no rank	Streptococcus oligofermentans AS 1.3089	Bacteria	root	Firmicutes	Bacilli	Lactobacillales	Streptococcaceae	Streptococcus	Streptococcus oligofermentans
2	12	1	2	2	19		2		11	7	9	4	14	14	1	3	1	1305764	no rank	Pseudozyma hubeiensis SY62	Eukaryota	Fungi	Basidiomycota	Ustilaginomycetes	Ustilaginales	Ustilaginaceae	Pseudozyma	Pseudozyma hubeiensis
2	4			1	1				6	2	5	1		6				1319845	species	Paratrichophaea boudieri	Eukaryota	Fungi	Ascomycota	Pezizomycetes	Pezizales	Pyronemataceae	Paratrichophaea	Paratrichophaea boudieri
3	8			2	1	3	3		2	1	4		5	4	2	9	1	1324350	species	Acinetobacter equi	Bacteria	root	Proteobacteria	Gammaproteobacteria	Pseudomonadales	Moraxellaceae	Acinetobacter	Acinetobacter equi
2	3	1	1	1	3	1	5	1	2	5	2		4	1	1	8		1331671	no rank	Pseudomonas putida H8234	Bacteria	root	Proteobacteria	Gammaproteobacteria	Pseudomonadales	Pseudomonadaceae	Pseudomonas	Pseudomonas putida
4	6	1	2	1	7	16	2	1	5	8	5	3	10	6	4	40		1354302	no rank	Aeromonas hydrophila 4AK4	Bacteria	root	Proteobacteria	Gammaproteobacteria	Aeromonadales	Aeromonadaceae	Aeromonas	Aeromonas hydrophila
7	8	1	1	4	16		1	3	13	9	17	5	13	6	3		2	1365824	no rank	Kalmanozyma brasiliensis GHG001	Eukaryota	Fungi	Basidiomycota	Ustilaginomycetes	Ustilaginales	Ustilaginaceae	Kalmanozyma	Kalmanozyma brasiliensis
4	3		2	1	23	2	4		13	4	4	4	3	16	2	2		1381753	no rank	Moniliophthora roreri MCA 2997	Eukaryota	Fungi	Basidiomycota	Agaricomycetes	Agaricales	Marasmiaceae	Moniliophthora	Moniliophthora roreri
5	2			2	3	5			3	6	7	1	5	5		3		1392005	no rank	Comamonas testosteroni TK102	Bacteria	root	Proteobacteria	Betaproteobacteria	Burkholderiales	Comamonadaceae	Comamonas	Comamonas testosteroni
42	78	54	25	18	56	3	177	39	70	65	52	32	63	55	12	59	5	1397361	no rank	Sporothrix schenckii 1099-18	Eukaryota	Fungi	Ascomycota	Sordariomycetes	Ophiostomatales	Ophiostomataceae	Sporothrix	Sporothrix schenckii
			2		4				8	7	3	4	3	7				1398364	species	Pseudogymnoascus sp. H AM-2013	Eukaryota	Fungi	Ascomycota	Leotiomycetes	root	Pseudeurotiaceae	Pseudogymnoascus	Pseudogymnoascus sp. H AM-2013
4	14	2	5	4	14		5	2	7	6	13	3	14	4	3	3	2	1398559	no rank	Melanopsichium pennsylvanicum 4	Eukaryota	Fungi	Basidiomycota	Ustilaginomycetes	Ustilaginales	Ustilaginaceae	Melanopsichium	Melanopsichium pennsylvanicum
5	10	1	3	2	2	1	2	2	3	4	3		3	10	3	17	3	1407071	species	Acinetobacter sp. TGL-Y2	Bacteria	root	Proteobacteria	Gammaproteobacteria	Pseudomonadales	Moraxellaceae	Acinetobacter	Acinetobacter sp. TGL-Y2
6	9	3	5	6	19		11		26	21	26	14	16	27	2	4	2	1408163	no rank	Rasamsonia emersonii CBS 393.64	Eukaryota	Fungi	Ascomycota	Eurotiomycetes	Eurotiales	Trichocomaceae	Rasamsonia	Rasamsonia emersonii
8	24	8	7	5	30	24	11	4	14	17	17	8	19	12	7	24	12	1419814	species	Streptococcus sp. VT 162	Bacteria	root	Firmicutes	Bacilli	Lactobacillales	Streptococcaceae	Streptococcus	Streptococcus sp. VT 162
	2				2				10	5	5	4	1	2				1432392	species	Trichoderma phyllostachydis	Eukaryota	Fungi	Ascomycota	Sordariomycetes	Hypocreales	Hypocreaceae	Trichoderma	Trichoderma phyllostachydis
1	9		1	2	12		2		6	6	8	9	8	5				1437815	no rank	Yarrowia lipolytica WSH-Z06	Eukaryota	Fungi	Ascomycota	Saccharomycetes	Saccharomycetales	Dipodascaceae	Yarrowia	Yarrowia lipolytica
6	15	7	8		25		5	2	42	29	33	20	32	35		4		1442368	no rank	Fonsecaea pedrosoi CBS 271.37	Eukaryota	Fungi	Ascomycota	Eurotiomycetes	Chaetothyriales	Herpotrichiellaceae	Fonsecaea	Fonsecaea pedrosoi
13	15	3	3	1	17		4		43	18	22	14	21	29	1	3	1	1442369	no rank	Rhinocladiella mackenziei CBS 650.93	Eukaryota	Fungi	Ascomycota	Eurotiomycetes	Chaetothyriales	Herpotrichiellaceae	Rhinocladiella	Rhinocladiella mackenziei
6	21	3	5	1	19	1	13	1	32	12	20	15	22	32		4	1	1442370	no rank	Cladophialophora bantiana CBS 173.52	Eukaryota	Fungi	Ascomycota	Eurotiomycetes	Chaetothyriales	Herpotrichiellaceae	Cladophialophora	Cladophialophora bantiana
14	22	5	4		25	1	7	3	38	21	24	24	22	29		3		1442371	no rank	Fonsecaea multimorphosa CBS 102226	Eukaryota	Fungi	Ascomycota	Eurotiomycetes	Chaetothyriales	Herpotrichiellaceae	Fonsecaea	Fonsecaea multimorphosa
30	57	49	24	11	34	11	179	16	18	32	41	9	29	33	4	52	6	1445577	no rank	Colletotrichum fioriniae PJ7	Eukaryota	Fungi	Ascomycota	Sordariomycetes	Glomerellales	Glomerellaceae	Colletotrichum	Colletotrichum fioriniae
	1	2	1		1	6		1	2	1	2	1	6	5	2	4		1448139	no rank	Aeromonas hydrophila YL17	Bacteria	root	Proteobacteria	Gammaproteobacteria	Aeromonadales	Aeromonadaceae	Aeromonas	Aeromonas hydrophila
1	5	4	2	3	8	4	1		1	16	4		4	2		22	5	1449752	no rank	Staphylococcus epidermidis PM221	Bacteria	root	Firmicutes	Bacilli	Bacillales	Staphylococcaceae	Staphylococcus	Staphylococcus epidermidis
2	25	42	2	2	2	5					1	4	1	1	4	2		1460371	no rank	Amycolatopsis lurida NRRL 2430	Bacteria	root	Actinobacteria	Actinobacteria	Pseudonocardiales	Pseudonocardiaceae	Amycolatopsis	Amycolatopsis lurida
11	8	3	1	5	14	1		1	4	5		3	3	1	2	13	1	1484157	species	Pantoea sp. PSNIH2	Bacteria	root	Proteobacteria	Gammaproteobacteria	Enterobacteriales	Enterobacteriaceae	Pantoea	Pantoea sp. PSNIH2
5	5	1	4	4	4	3	7	1	2	3			3	5	1	8		1487956	species	Corynebacterium sp. ATCC 6931	Bacteria	root	Actinobacteria	Actinobacteria	Corynebacteriales	Corynebacteriaceae	Corynebacterium	Corynebacterium sp. ATCC 6931
19	29	8	7	6	30		24		43	35	38	30	33	34		6	6	1509407	no rank	Aspergillus nomius NRRL 13137	Eukaryota	Fungi	Ascomycota	Eurotiomycetes	Eurotiales	Aspergillaceae	Aspergillus	Aspergillus nomius
3	17	5	1	1	2	1	5	2	2	6	1	1	3	4	2	5	2	1528099	species	Lawsonella clevelandensis	Bacteria	root	Actinobacteria	Actinobacteria	Corynebacteriales	root	Lawsonella	Lawsonella clevelandensis
2	5	1	2		1	5	3	4	4	7	9	3	11	2	11	7	5	1532555	species	Brevundimonas sp. DS20	Bacteria	root	Proteobacteria	Alphaproteobacteria	Caulobacterales	Caulobacteraceae	Brevundimonas	Brevundimonas sp. DS20
6	14	13	6	2	5						1	6	1	3	1	1	1	1561022	species	Streptomyces sp. CCM_MD2014	Bacteria	root	Actinobacteria	Actinobacteria	Streptomycetales	Streptomycetaceae	Streptomyces	Streptomyces sp. CCM_MD2014
	1	1	1		6				6	4	7	2	3	17				1582311	species	Phaeosphaeria chiangraina	Eukaryota	Fungi	Ascomycota	Dothideomycetes	Pleosporales	Phaeosphaeriaceae	Phaeosphaeria	Phaeosphaeria chiangraina
17	26	3	7	4	6	8	7	2	3	22	9	6	15	29	1	70	2	1608473	species	Acinetobacter sp. NCu2D-2	Bacteria	root	Proteobacteria	Gammaproteobacteria	Pseudomonadales	Moraxellaceae	Acinetobacter	Acinetobacter sp. NCu2D-2
3	5	1	1		1	2	2	8	5	4	1	2	4	6	3	3	2	1609977	species	Sphingomonas hengshuiensis	Bacteria	root	Proteobacteria	Alphaproteobacteria	Sphingomonadales	Sphingomonadaceae	Sphingomonas	Sphingomonas hengshuiensis
4	2	2			5				7	2	10	7	3	14				1642271	species	Abrothallus sp. von Brackel 5491	Eukaryota	Fungi	Ascomycota	Dothideomycetes	Abrothallales	Abrothallaceae	Abrothallus	Abrothallus sp. von Brackel 5491
9	20	4	2		8	6	5	5	5	15	8	5	7	18	1	31	4	1646498	species	Acinetobacter sp. TTH0-4	Bacteria	root	Proteobacteria	Gammaproteobacteria	Pseudomonadales	Moraxellaceae	Acinetobacter	Acinetobacter sp. TTH0-4
2	9	2	5	5	9	4	4	3	1	6	6	5	7	5	10	4	1	1658665	species	Mitsuaria sp. 7	Bacteria	root	Proteobacteria	Betaproteobacteria	Burkholderiales	root	Mitsuaria	Mitsuaria sp. 7
1	6		2	2	2	2	1	2	2	8	1	1	5	3		8	2	1685010	species	Chryseobacterium sp. IHB B 10212	Bacteria	root	Bacteroidetes	Flavobacteriia	Flavobacteriales	Flavobacteriaceae	Chryseobacterium	Chryseobacterium sp. IHB B 10212
2	2		1	1		3	6	1	5	6	8	4	10	3	1	1	3	1690248	species	Arthrobacter sp. LS16	Bacteria	root	Actinobacteria	Actinobacteria	Micrococcales	Micrococcaceae	Arthrobacter	Arthrobacter sp. LS16
	8	6	2	1	2	10	3	5	1	2	1	3	4	4	3	21	6	1707785	species	Massilia sp. WG5	Bacteria	root	Proteobacteria	Betaproteobacteria	Burkholderiales	Oxalobacteraceae	Massilia	Massilia sp. WG5
5	39	26	14	5	12	2				1	4	9	16	2	3	5	4	1725411	species	Streptomyces sp. CdTB01	Bacteria	root	Actinobacteria	Actinobacteria	Streptomycetales	Streptomycetaceae	Streptomyces	Streptomyces sp. CdTB01
3	15	10	5	4	2	2			1			5	6	1	2	8	1	1751294	species	Streptomyces sp. 4F	Bacteria	root	Actinobacteria	Actinobacteria	Streptomycetales	Streptomycetaceae	Streptomyces	Streptomyces sp. 4F
3	5	2	5	1	6	72	1	11	7	16	6	3	6	5	4	17	4	1759399	species	Streptococcus sp. A12	Bacteria	root	Firmicutes	Bacilli	Lactobacillales	Streptococcaceae	Streptococcus	Streptococcus sp. A12
1	4		1	1	10				4	3	4	2	6	6				1778431	species	Pseudotricharina intermedia	Eukaryota	Fungi	Ascomycota	Pezizomycetes	Pezizales	Pyronemataceae	Pseudotricharina	Pseudotricharina intermedia
7	27	17	7	11	29	4	3	2	4		5	17	17	2	4	6	10	1783515	species	Streptomyces sp. S10(2016)	Bacteria	root	Actinobacteria	Actinobacteria	Streptomycetales	Streptomycetaceae	Streptomyces	Streptomyces sp. S10(2016)
6	11	2	1	3	2	3	3	1	1	4	3		1	6	1	22	1	1785995	species	Gemella sp. oral taxon 928	Bacteria	root	Firmicutes	Bacilli	Bacillales	root	Gemella	Gemella sp. oral taxon 928
5	3	1		4	3	2	4	2	4	6		4	3	5	3	10	2	1809055	species	Acinetobacter sp. DUT-2	Bacteria	root	Proteobacteria	Gammaproteobacteria	Pseudomonadales	Moraxellaceae	Acinetobacter	Acinetobacter sp. DUT-2
2	8	1	5	1		18	5	4	8	20	15	14	23	11	9	42	6	1827469	species	Brevundimonas sp. GW460-12-10-14-LB2	Bacteria	root	Proteobacteria	Alphaproteobacteria	Caulobacterales	Caulobacteraceae	Brevundimonas	Brevundimonas sp. GW460-12-10-14-LB2
2	7		1	1	8				14	11	9	12	11	15				1837913	species	Boerlagiomyces sp. MD-2016	Eukaryota	Fungi	Ascomycota	Dothideomycetes	Tubeufiales	Tubeufiaceae	Boerlagiomyces	Boerlagiomyces sp. MD-2016
1	9	6	1	1	5	1		1	1	1			5	4	1	2	1	1841249	species	Streptomyces sp. RTd22	Bacteria	root	Actinobacteria	Actinobacteria	Streptomycetales	Streptomycetaceae	Streptomyces	Streptomyces sp. RTd22
2	12	9	1	6	5		1	1	1		1	8	9	2		2	1	1849967	species	Streptomyces sp. SAT1	Bacteria	root	Actinobacteria	Actinobacteria	Streptomycetales	Streptomycetaceae	Streptomyces	Streptomyces sp. SAT1
5	7		1	2	13				22	22	11	10	15	24				1857663	species	Sugiyamaella sp. SH-2016a	Eukaryota	Fungi	Ascomycota	Saccharomycetes	Saccharomycetales	Trichomonascaceae	Sugiyamaella	Sugiyamaella sp. SH-2016a

## Sheet: DESeq2_bacteriaFamily_ALvsRO
	baseMean	log2FoldChange	lfcSE	stat	pvalue	padj	Significant
Kofleriaceae	2.64871	2.24283	0.69885	3.20932	0.00133049	0.029936	Yes
Nocardiopsaceae	4.04588	2.65	0.561744	4.71745	2.38813e-06	0.000107466	Yes
Actinomycetaceae	13.8066	0.0599194	0.361576	0.165717	0.86838	0.995613	No
Aerococcaceae	12.5915	-0.118468	0.36852	-0.321471	0.747854	0.995613	No
Aeromonadaceae	30.4534	-0.256823	0.345501	-0.743335	0.457279	0.995613	No
Alcaligenaceae	4.42842	0.00339814	0.618055	0.00549812	0.995613	0.995613	No
Bacillaceae	4.36437	-0.0568473	0.6516	-0.0872426	0.930479	0.995613	No
Brucellaceae	18.8179	-0.0596578	0.618114	-0.0965158	0.923111	0.995613	No
Burkholderiaceae	75.0321	-0.758138	0.436847	-1.73548	0.0826564	0.660145	No
Caulobacteraceae	17.6766	0.0837458	0.451938	0.185304	0.852991	0.995613	No
Comamonadaceae	35.4534	-0.0480623	0.369809	-0.129965	0.896594	0.995613	No
Corynebacteriaceae	31.3641	-0.198627	0.368904	-0.538424	0.590284	0.995613	No
Dermacoccaceae	4.61164	0.472386	0.532155	0.887686	0.37471	0.995613	No
Enterobacteriaceae	740.874	0.0490213	0.383928	0.127684	0.898399	0.995613	No
Flavobacteriaceae	2.15635	0.0820576	0.549635	0.149295	0.881321	0.995613	No
Gordoniaceae	3.13325	-0.353265	0.625401	-0.564861	0.572168	0.995613	No
Lactobacillaceae	10.5872	0.0647093	0.396117	0.163359	0.870236	0.995613	No
Leuconostocaceae	8.47277	-0.301327	0.570365	-0.528306	0.597287	0.995613	No
Methylobacteriaceae	19.0863	0.0252067	0.680815	0.0370243	0.970466	0.995613	No
Micrococcaceae	237.985	-0.585205	0.383825	-1.52466	0.127343	0.746934	No
Moraxellaceae	685.15	0.454292	0.2663	1.70594	0.0880193	0.660145	No
Mycobacteriaceae	1.68072	0.00494593	0.657132	0.00752654	0.993995	0.995613	No
Mycoplasmataceae	41.8387	-0.0111995	0.701063	-0.015975	0.987254	0.995613	No
Neisseriaceae	9.73288	-0.08249	0.600957	-0.137264	0.890822	0.995613	No
Nocardiaceae	2.87914	-0.398797	0.520197	-0.766627	0.443303	0.995613	No
Nocardioidaceae	5.1135	-0.798338	0.545442	-1.46365	0.143289	0.746934	No
Oxalobacteraceae	4.25106	0.124066	0.542823	0.228557	0.819213	0.995613	No
Pasteurellaceae	49.347	-1.30068	0.458787	-2.83504	0.00458201	0.0515477	No
Peptoniphilaceae	4.2231	-0.851732	0.614871	-1.38522	0.165985	0.746934	No
Prevotellaceae	9.33013	-0.436174	0.487579	-0.894569	0.371017	0.995613	No
Propionibacteriaceae	1505.29	0.137771	0.233749	0.589398	0.555594	0.995613	No
Pseudomonadaceae	204.648	0.3873	0.31434	1.23211	0.217909	0.891447	No
Pseudonocardiaceae	49.4958	0.636443	0.665791	0.955921	0.339112	0.995613	No
Rhizobiaceae	25.1671	-0.0647209	0.256517	-0.252307	0.800804	0.995613	No
Rhodobacteraceae	1.84892	-0.329536	0.619683	-0.531781	0.594877	0.995613	No
Rhodocyclaceae	7.97559	0.247858	0.52744	0.469925	0.638408	0.995613	No
Shewanellaceae	2.11242	-0.826228	0.703152	-1.17503	0.239981	0.899929	No
Sphingomonadaceae	13.2499	0.138496	0.327229	0.423239	0.672121	0.995613	No
Staphylococcaceae	243.564	0.0601343	0.388445	0.154808	0.876973	0.995613	No
Streptococcaceae	294.297	-0.3954	0.283777	-1.39335	0.163515	0.746934	No
Streptomycetaceae	209.921	0.108282	0.592638	0.182712	0.855024	0.995613	No
Streptosporangiaceae	4.01451	1.87552	0.654055	2.86752	0.00413706	0.0515477	No
Thermaceae	8.88204	0.371228	0.388013	0.956739	0.338699	0.995613	No
Veillonellaceae	5.17938	-0.0661113	0.461606	-0.14322	0.886116	0.995613	No
Xanthomonadaceae	51.1198	-0.0985033	0.267567	-0.368144	0.712766	0.995613	No

## Sheet: DESeq2_bacteriaFamily_CvsB
	baseMean	log2FoldChange	lfcSE	stat	pvalue	padj	Significant
Mycoplasmataceae	41.8387	-5.98702	0.614615	-9.74109	2.01381e-22	8.65939e-21	Yes
Pasteurellaceae	49.347	-1.20061	0.390087	-3.0778	0.00208537	0.0112089	Yes
Corynebacteriaceae	31.3641	-0.813602	0.251505	-3.23493	0.00121672	0.0104638	Yes
Micrococcaceae	199.443	-0.457166	0.146728	-3.11573	0.0018349	0.0112089	Yes
Enterobacteriaceae	740.874	0.860026	0.250474	3.4336	0.000595624	0.00640296	Yes
Caulobacteraceae	17.6766	0.990448	0.35273	2.80795	0.00498586	0.0238213	Yes
Burkholderiaceae	75.0321	1.10301	0.316366	3.4865	0.00048939	0.00640296	Yes
Methylobacteriaceae	19.0863	1.48518	0.587079	2.52978	0.0114133	0.0490771	Yes
Brucellaceae	18.8179	1.52249	0.483231	3.15064	0.00162914	0.0112089	Yes
Bacillaceae	4.36437	1.99219	0.528962	3.76624	0.000165728	0.00356314	Yes
Alcaligenaceae	4.42842	-1.24989	0.513514	-2.43399	0.0149333	0.0583758	No
Streptomycetaceae	209.921	-1.22114	0.557874	-2.18892	0.0286026	0.0843005	No
Peptoniphilaceae	4.2231	-0.898995	0.546831	-1.64401	0.100175	0.196255	No
Pseudonocardiaceae	49.4958	-0.896585	0.621147	-1.44344	0.148898	0.266775	No
Dermacoccaceae	4.61164	-0.832754	0.481529	-1.7294	0.0837383	0.189513	No
Nocardioidaceae	5.1135	-0.772779	0.465536	-1.65998	0.0969189	0.196255	No
Rhodobacteraceae	1.84892	-0.68069	0.559931	-1.21567	0.224111		No
Nocardiopsaceae	4.04588	-0.603182	0.670622	-0.899437	0.36842	0.565788	No
Xanthomonadaceae	51.1198	-0.36984	0.204828	-1.80561	0.0709789	0.179535	No
Neisseriaceae	5.98889	-0.364826	0.360092	-1.01315	0.31099	0.49528	No
Mycobacteriaceae	1.68072	-0.332756	0.6232	-0.533948	0.593378		No
Oxalobacteraceae	4.25106	-0.235737	0.51991	-0.453419	0.650247	0.752074	No
Sphingomonadaceae	13.2499	-0.234854	0.271032	-0.866516	0.386207	0.572652	No
Actinomycetaceae	13.8066	-0.220205	0.300437	-0.732949	0.463589	0.648764	No
Leuconostocaceae	6.55214	-0.19069	0.439847	-0.433538	0.664624	0.752074	No
Prevotellaceae	9.33013	-0.187867	0.423727	-0.443367	0.6575	0.752074	No
Veillonellaceae	5.17938	-0.185432	0.403213	-0.459886	0.645598	0.752074	No
Moraxellaceae	685.15	-0.163959	0.22937	-0.714826	0.474717	0.648764	No
Streptococcaceae	294.297	-0.14309	0.242049	-0.591161	0.554413	0.701169	No
Staphylococcaceae	243.564	-0.101486	0.325388	-0.311893	0.755122	0.805095	No
Thermaceae	8.88204	-0.0994982	0.336766	-0.295452	0.767649	0.805095	No
Rhizobiaceae	25.1671	-0.00435481	0.212735	-0.0204706	0.983668	0.983668	No
Pseudomonadaceae	204.648	0.00791856	0.270584	0.0292647	0.976653	0.983668	No
Flavobacteriaceae	2.15635	0.189465	0.5008	0.378325	0.705189	0.777517	No
Rhodocyclaceae	7.97559	0.313015	0.475711	0.657994	0.510542	0.665252	No
Nocardiaceae	2.87914	0.337351	0.48069	0.701805	0.482801	0.648764	No
Propionibacteriaceae	1505.29	0.359192	0.168838	2.12743	0.0333845	0.0897208	No
Comamonadaceae	35.4534	0.373335	0.303558	1.22986	0.218748	0.376247	No
Lactobacillaceae	10.5872	0.540322	0.328889	1.64287	0.10041	0.196255	No
Aerococcaceae	12.5915	0.551563	0.316346	1.74355	0.0812383	0.189513	No
Aeromonadaceae	30.4534	0.576599	0.264739	2.17799	0.0294071	0.0843005	No
Gordoniaceae	3.13325	0.836078	0.560758	1.49098	0.135968	0.2542	No
Streptosporangiaceae	4.01451	0.845354	0.754374	1.1206	0.262457	0.434064	No
Shewanellaceae	2.11242	1.49561	0.658319	2.27187	0.0230945	0.0827553	No
Kofleriaceae	2.64871	1.66518	0.75228	2.21351	0.0268623	0.0843005	No

## Sheet: DESeq2_bacteriaFamily_NvsCont
	baseMean	log2FoldChange	lfcSE	stat	pvalue	padj	Significant
Oxalobacteraceae	4.25106	-1.34378	0.461956	-2.90889	0.00362709	0.0408047	Yes
Streptomycetaceae	209.921	2.04782	0.55437	3.69397	0.000220782	0.00496759	Yes
Nocardiopsaceae	4.04588	2.2433	0.713802	3.14275	0.00167371	0.0251057	Yes
Streptosporangiaceae	4.01451	3.20179	0.786332	4.0718	4.66505e-05	0.00209927	Yes
Neisseriaceae	9.73288	-1.19656	0.552725	-2.16483	0.0304007	0.228005	No
Leuconostocaceae	8.47277	-0.977897	0.519554	-1.88218	0.0598111	0.331014	No
Caulobacteraceae	17.6766	-0.767664	0.394317	-1.94682	0.0515567	0.331014	No
Gordoniaceae	3.13325	-0.540227	0.589302	-0.916724	0.359288	0.887743	No
Mycoplasmataceae	41.8387	-0.438964	0.846068	-0.518828	0.603881	0.955131	No
Alcaligenaceae	4.42842	-0.43173	0.58124	-0.742775	0.457618	0.936036	No
Shewanellaceae	2.11242	-0.382281	0.721685	-0.529705	0.596316	0.955131	No
Methylobacteriaceae	19.0863	-0.336258	0.669573	-0.502197	0.615529	0.955131	No
Staphylococcaceae	243.564	-0.315781	0.339054	-0.931359	0.351668	0.887743	No
Aeromonadaceae	30.4534	-0.299213	0.30379	-0.984932	0.324657	0.887743	No
Burkholderiaceae	75.0321	-0.252292	0.41117	-0.613595	0.539483	0.955131	No
Brucellaceae	18.8179	-0.114592	0.583888	-0.196256	0.844409	0.995046	No
Enterobacteriaceae	740.874	-0.0251373	0.334923	-0.0750539	0.940172	0.995046	No
Moraxellaceae	685.15	0.00153501	0.247234	0.00620873	0.995046	0.995046	No
Sphingomonadaceae	13.2499	0.00856447	0.293547	0.0291758	0.976724	0.995046	No
Actinomycetaceae	13.8066	0.018457	0.322648	0.0572047	0.954382	0.995046	No
Pasteurellaceae	37.1452	0.0271133	0.325127	0.0833931	0.933539	0.995046	No
Bacillaceae	4.36437	0.0272869	0.633748	0.0430564	0.965657	0.995046	No
Nocardioidaceae	5.1135	0.0343118	0.52585	0.0652501	0.947975	0.995046	No
Rhizobiaceae	25.1671	0.045935	0.227118	0.202252	0.83972	0.995046	No
Thermaceae	8.88204	0.0463957	0.359674	0.128994	0.897362	0.995046	No
Propionibacteriaceae	1505.29	0.0747904	0.201844	0.370536	0.710983	0.995046	No
Flavobacteriaceae	2.15635	0.106758	0.533903	0.199957	0.841514	0.995046	No
Prevotellaceae	9.33013	0.1307	0.454814	0.287371	0.773829	0.995046	No
Streptococcaceae	294.297	0.135794	0.257953	0.526431	0.598589	0.955131	No
Xanthomonadaceae	51.1198	0.145183	0.234649	0.618723	0.536099	0.955131	No
Micrococcaceae	237.985	0.166388	0.354113	0.469872	0.638447	0.95767	No
Corynebacteriaceae	31.3641	0.168474	0.327605	0.514259	0.607071	0.955131	No
Rhodobacteraceae	1.84892	0.18331	0.61496	0.298084	0.765639	0.995046	No
Peptoniphilaceae	4.2231	0.220167	0.60656	0.362977	0.716622	0.995046	No
Pseudomonadaceae	204.648	0.225474	0.283143	0.796327	0.425842	0.931871	No
Comamonadaceae	35.4534	0.290292	0.3271	0.887472	0.374825	0.887743	No
Veillonellaceae	5.17938	0.34248	0.438582	0.78088	0.434873	0.931871	No
Lactobacillaceae	10.5872	0.453126	0.367911	1.23162	0.218091	0.754931	No
Nocardiaceae	2.87914	0.491132	0.521493	0.94178	0.346305	0.887743	No
Mycobacteriaceae	1.68072	0.626424	0.678858	0.922761	0.356132	0.887743	No
Rhodocyclaceae	7.97559	0.628311	0.50049	1.25539	0.209337	0.754931	No
Aerococcaceae	12.5915	0.634737	0.34552	1.83705	0.0662027	0.331014	No
Dermacoccaceae	4.61164	0.866586	0.534106	1.6225	0.104697	0.428304	No
Pseudonocardiaceae	49.4958	1.16609	0.657728	1.7729	0.0762453	0.343104	No
Kofleriaceae	1.24585	2.11569	0.8003	2.64362	0.00820246	0.0738222	No

## Sheet: DESeq2_fungiFamily_ALvsRO
	baseMean	log2FoldChange	lfcSE	stat	pvalue	padj	Significant
Claroideoglomeraceae	27.25	-4.95138	1.32458	-3.73807	0.000185436	0.00780306	Yes
Ceratocystidaceae	6.79222	-3.83565	1.1766	-3.25994	0.00111437	0.029345	Yes
Glomeraceae	262.057	-3.2072	0.861657	-3.72213	0.000197546	0.00780306	Yes
Pneumocystidaceae	1.48499	-3.25748	1.14482	-2.84541	0.00443545	0.0876002	No
Psathyrellaceae	5.63159	-1.32899	0.725707	-1.8313	0.0670562	0.657324	No
Saccharomycetaceae	29.9803	-1.17107	0.631184	-1.85535	0.0635461	0.657324	No
Stereaceae	4.87957	-1.01059	0.590091	-1.71259	0.0867876	0.685622	No
Phaffomycetaceae	4.30968	-0.955538	0.724209	-1.31942	0.187028	0.878226	No
Agaricaceae	6.96816	-0.911965	0.512004	-1.78117	0.074885	0.657324	No
Cladosporiaceae	2.04708	-0.904226	0.892337	-1.01332	0.310905	0.953332	No
Marasmiaceae	3.82462	-0.87809	0.671744	-1.30718	0.191152	0.878226	No
Coriolaceae	4.96632	-0.868353	0.639562	-1.35773	0.174549	0.878226	No
Pyronemataceae	54.2265	-0.847018	0.661082	-1.28126	0.200102	0.878226	No
Phanerochaetaceae	3.2271	-0.833709	0.799601	-1.04266	0.297107	0.953332	No
Tremellaceae	12.6927	-0.799693	0.415486	-1.92472	0.0542644	0.657324	No
Gloeophyllaceae	4.81368	-0.759128	0.6539	-1.16092	0.245673	0.953332	No
Auriculariaceae	2.41687	-0.695682	0.78269	-0.888834	0.374092	0.953332	No
Dipodascaceae	5.51984	-0.681713	0.633881	-1.07546	0.28217	0.953332	No
Polyporaceae	8.42996	-0.63878	0.604572	-1.05658	0.290703	0.953332	No
Schizosaccharomycetaceae	16.5521	-0.620775	0.375555	-1.65295	0.0983402	0.706261	No
Coniophoraceae	3.97303	-0.564443	0.622757	-0.906362	0.364745	0.953332	No
Pseudeurotiaceae	4.27319	-0.505199	0.489615	-1.03183	0.302152	0.953332	No
Trichosporonaceae	5.20594	-0.504144	0.533833	-0.944386	0.344973	0.953332	No
Punctulariaceae	3.25834	-0.502271	0.840429	-0.597637	0.550082	0.99907	No
Pleosporaceae	116.541	-0.487889	0.587917	-0.82986	0.406618	0.99907	No
Helotiaceae	8.5515	-0.45083	0.450162	-1.00148	0.316593	0.953332	No
Ceratobasidiaceae	6.7311	-0.446903	0.914414	-0.488732	0.625031	0.99907	No
Hymenochaetaceae	5.88108	-0.429139	0.619234	-0.693016	0.4883	0.99907	No
Tubeufiaceae	3.01143	-0.424092	0.659484	-0.643066	0.520181	0.99907	No
Phaeosphaeriaceae	8.10199	-0.40648	0.618363	-0.657348	0.510957	0.99907	No
Melampsoraceae	3.52353	-0.394697	0.590961	-0.66789	0.504204	0.99907	No
Ustilaginaceae	36.2442	-0.359699	0.402144	-0.894453	0.371079	0.953332	No
Bondarzewiaceae	7.9817	-0.307606	0.586171	-0.524772	0.599742	0.99907	No
Dermateaceae	12.5266	-0.289757	0.429366	-0.674848	0.499772	0.99907	No
Verrucariaceae	3.11438	-0.271642	0.634912	-0.427842	0.668766	0.99907	No
Trichocomaceae	7.9153	-0.234995	0.464292	-0.506136	0.612761	0.99907	No
Sclerotiniaceae	35.3528	-0.223835	0.442612	-0.505715	0.613057	0.99907	No
Trichomonascaceae	16.7924	-0.161371	0.456371	-0.353595	0.723642	0.99907	No
Abrothallaceae	1.8743	-0.136971	0.784525	-0.174592	0.861401	0.99907	No
Serpulaceae	2.43442	-0.104553	0.769175	-0.135928	0.891878	0.99907	No
Arthrodermataceae	8.44206	-0.100058	0.406671	-0.246042	0.80565	0.99907	No
Clavicipitaceae	31.6816	-0.0980294	0.339389	-0.28884	0.772703	0.99907	No
Metschnikowiaceae	4.05603	-0.0781476	0.730548	-0.106971	0.914812	0.99907	No
Orbiliaceae	24.6135	-0.0722703	0.367249	-0.196788	0.843993	0.99907	No
Togniniaceae	18.7809	-0.0716535	0.311892	-0.229738	0.818295	0.99907	No
Hypocreaceae	62.0328	-0.0558871	0.335254	-0.166701	0.867605	0.99907	No
Aureobasidiaceae	21.1653	-0.0547135	0.260444	-0.210078	0.833607	0.99907	No
Botryosphaeriaceae	12.4111	-0.0541629	0.339496	-0.159539	0.873244	0.99907	No
Cordycipitaceae	38.5627	-0.0520213	0.26345	-0.197462	0.843466	0.99907	No
Sympoventuriaceae	10.2631	-0.0495824	0.548791	-0.0903484	0.92801	0.99907	No
Sporocadaceae	12.0157	-0.0492566	0.36538	-0.134809	0.892763	0.99907	No
Ajellomycetaceae	9.55511	-0.0299539	0.431029	-0.069494	0.944596	0.99907	No
Mycosphaerellaceae	24.5299	-0.0267717	0.336241	-0.0796207	0.936539	0.99907	No
Magnaporthaceae	31.3364	-0.0219782	0.298194	-0.0737045	0.941246	0.99907	No
Spizellomycetaceae	9.34725	-0.0026747	0.493855	-0.00541596	0.995679	0.99907	No
Aspergillaceae	111.311	0.000339248	0.291063	0.00116555	0.99907	0.99907	No
Herpotrichiellaceae	157.021	0.00050067	0.366775	0.00136506	0.998911	0.99907	No
Tuberaceae	26.8099	0.0193089	0.46996	0.0410863	0.967227	0.99907	No
Debaryomycetaceae	7.12136	0.023641	0.7057	0.0335001	0.973276	0.99907	No
Schizophyllaceae	7.86414	0.0281375	0.58988	0.0477004	0.961955	0.99907	No
Malasseziaceae	156.074	0.0522186	0.474559	0.110036	0.912381	0.99907	No
Lasiosphaeriaceae	25.8761	0.068075	0.262973	0.258867	0.795738	0.99907	No
Mixiaceae	1.9534	0.0682573	0.601102	0.113554	0.909592	0.99907	No
Microascaceae	34.6628	0.0743519	0.232729	0.319478	0.749364	0.99907	No
Glomerellaceae	81.8957	0.123917	0.374735	0.330678	0.740888	0.99907	No
Teratosphaeriaceae	2.96015	0.14475	0.536914	0.269596	0.787471	0.99907	No
Lichtheimiaceae	11.346	0.160838	0.537647	0.299151	0.764824	0.99907	No
Hysteriaceae	1.02933	0.196379	0.893515	0.219782	0.826041	0.99907	No
Plectosphaerellaceae	217.199	0.245469	0.412228	0.59547	0.551529	0.99907	No
Cyphellophoraceae	8.90195	0.252373	0.338416	0.745749	0.455819	0.99907	No
Leptosphaeriaceae	131.127	0.335103	0.637772	0.525428	0.599286	0.99907	No
Sordariaceae	49.7364	0.344785	0.238807	1.44378	0.1488	0.878226	No
Ophiostomataceae	54.373	0.361096	0.230212	1.56854	0.116756	0.768641	No
Sporidiobolaceae	6.54456	0.380157	0.469096	0.810403	0.417709	0.99907	No
Diatrypaceae	11.096	0.473284	0.36215	1.30687	0.191256	0.878226	No
Tilletiariaceae	2.60138	0.547366	0.609131	0.898601	0.368865	0.953332	No
Olpidiaceae	17.4395	0.716323	0.94896	0.75485	0.450339	0.99907	No
Chaetomiaceae	47.4636	1.07935	0.48777	2.21282	0.02691	0.425177	No
Nectriaceae	3725.07	1.23496	0.992867	1.24383	0.213561	0.887964	No

## Sheet: DESeq2_fungiFamily_CvsB
	baseMean	log2FoldChange	lfcSE	stat	pvalue	padj	Significant
Nectriaceae	3725.07	-3.10182	0.550292	-5.63668	1.73364e-08	1.36957e-06	Yes
Mycosphaerellaceae	24.5299	0.877337	0.254756	3.44383	0.000573539	0.0226548	Yes
Metschnikowiaceae	4.05603	1.63075	0.491598	3.31725	0.000909092	0.0239394	Yes
Ceratobasidiaceae	6.7311	-1.63926	0.603241	-2.71742	0.00657939	0.0744267	No
Glomeraceae	262.057	-0.942936	0.706875	-1.33395	0.18222	0.360942	No
Pneumocystidaceae	1.48499	-0.886155	0.708849	-1.25013	0.211251	0.397354	No
Glomerellaceae	81.8957	-0.813069	0.339146	-2.3974	0.0165119	0.108703	No
Plectosphaerellaceae	217.199	-0.783458	0.320674	-2.44316	0.0145592	0.104561	No
Clavicipitaceae	31.6816	-0.694109	0.250308	-2.77302	0.00555381	0.0744267	No
Leptosphaeriaceae	83.7315	-0.531661	0.343911	-1.54593	0.122122	0.301489	No
Sporocadaceae	12.0157	-0.518323	0.348718	-1.48637	0.137182	0.318747	No
Hypocreaceae	62.0328	-0.382749	0.256131	-1.49435	0.135085	0.318747	No
Lasiosphaeriaceae	25.8761	-0.357733	0.246772	-1.44965	0.147157	0.332154	No
Sordariaceae	49.7364	-0.347144	0.219524	-1.58135	0.113799	0.29967	No
Cordycipitaceae	38.5627	-0.342754	0.241905	-1.4169	0.156513	0.339096	No
Serpulaceae	2.43442	-0.320518	0.646141	-0.496049	0.61986	0.906832	No
Pleosporaceae	87.2611	-0.319811	0.380663	-0.840143	0.400828	0.646233	No
Gloeophyllaceae	4.81368	-0.253136	0.537477	-0.470971	0.637661	0.915914	No
Diatrypaceae	11.096	-0.219767	0.31694	-0.693403	0.488057	0.771129	No
Coriolaceae	4.96632	-0.201306	0.503545	-0.399777	0.68932	0.920168	No
Phaffomycetaceae	4.30968	-0.188394	0.588535	-0.320108	0.748887	0.920168	No
Microascaceae	34.6628	-0.182874	0.213887	-0.855005	0.392549	0.64607	No
Polyporaceae	8.42996	-0.172821	0.492543	-0.350874	0.725683	0.920168	No
Ophiostomataceae	54.373	-0.144127	0.263563	-0.54684	0.584489	0.871219	No
Togniniaceae	18.7809	-0.110796	0.282063	-0.392805	0.694464	0.920168	No
Saccharomycetaceae	29.9803	-0.090179	0.503141	-0.179232	0.857755	0.965329	No
Psathyrellaceae	5.63159	-0.0849447	0.594451	-0.142896	0.886372	0.965329	No
Coniophoraceae	3.97303	-0.0555048	0.51905	-0.106935	0.91484	0.965329	No
Trichosporonaceae	5.20594	-0.0392628	0.463264	-0.0847526	0.932458	0.965329	No
Chaetomiaceae	35.7479	-0.0272619	0.204137	-0.133547	0.893761	0.965329	No
Claroideoglomeraceae	11.2225	0.0119515	0.679586	0.0175865	0.985969	0.985969	No
Botryosphaeriaceae	12.4111	0.0223851	0.301887	0.0741507	0.94089	0.965329	No
Aureobasidiaceae	21.1653	0.0249695	0.248879	0.100328	0.920084	0.965329	No
Phanerochaetaceae	3.2271	0.0270912	0.606989	0.0446321	0.964401	0.976765	No
Lichtheimiaceae	11.346	0.0424317	0.524815	0.0808507	0.935561	0.965329	No
Ceratocystidaceae	6.79222	0.0605707	0.708454	0.0854971	0.931866	0.965329	No
Magnaporthaceae	31.3364	0.0710831	0.268724	0.264521	0.791378	0.933118	No
Malasseziaceae	156.074	0.123857	0.402052	0.308062	0.758035	0.920168	No
Auriculariaceae	2.41687	0.139428	0.599653	0.232514	0.816139	0.948161	No
Tremellaceae	12.6927	0.143789	0.446457	0.322067	0.747402	0.920168	No
Debaryomycetaceae	7.12136	0.158129	0.537831	0.294013	0.768748	0.920168	No
Marasmiaceae	3.82462	0.177514	0.543356	0.3267	0.743895	0.920168	No
Cyphellophoraceae	8.90195	0.179939	0.312839	0.575181	0.565169	0.858622	No
Teratosphaeriaceae	2.96015	0.192073	0.440232	0.4363	0.662619	0.918367	No
Punctulariaceae	3.25834	0.215254	0.610213	0.352752	0.724274	0.920168	No
Agaricaceae	6.96816	0.240621	0.548024	0.439071	0.66061	0.918367	No
Melampsoraceae	3.52353	0.354678	0.548287	0.646883	0.517707	0.801939	No
Schizophyllaceae	7.86414	0.415523	0.462378	0.898666	0.36883	0.619949	No
Ustilaginaceae	36.2442	0.431069	0.325648	1.32373	0.185594	0.360942	No
Bondarzewiaceae	7.9817	0.451984	0.492001	0.918665	0.358271	0.615291	No
Sporidiobolaceae	6.54456	0.486058	0.398143	1.22081	0.222157	0.403947	No
Aspergillaceae	111.311	0.510411	0.202305	2.52298	0.0116364	0.102141	No
Schizosaccharomycetaceae	16.5521	0.526152	0.433624	1.21338	0.224983	0.403947	No
Ajellomycetaceae	9.55511	0.552924	0.419347	1.31854	0.187324	0.360942	No
Spizellomycetaceae	9.34725	0.616406	0.453137	1.36031	0.173733	0.360942	No
Hymenochaetaceae	5.88108	0.619002	0.539786	1.14676	0.251483	0.441492	No
Dermateaceae	12.5266	0.658754	0.402831	1.63531	0.101984	0.283568	No
Verrucariaceae	3.11438	0.694231	0.49269	1.40906	0.158817	0.339096	No
Arthrodermataceae	8.44206	0.712041	0.33721	2.11156	0.034724	0.161364	No
Helotiaceae	8.5515	0.751111	0.409788	1.83292	0.0668141	0.21993	No
Sclerotiniaceae	35.3528	0.757225	0.393564	1.92402	0.054352	0.204467	No
Herpotrichiellaceae	157.021	0.778855	0.314054	2.48001	0.0131381	0.103791	No
Pseudeurotiaceae	4.27319	0.796257	0.471362	1.68927	0.0911682	0.266751	No
Tilletiariaceae	2.60138	0.806732	0.516275	1.5626	0.118146	0.301082	No
Orbiliaceae	24.6135	0.815278	0.440504	1.85079	0.0642004	0.21993	No
Phaeosphaeriaceae	8.10199	0.851652	0.483503	1.76142	0.0781672	0.238817	No
Sympoventuriaceae	10.2631	0.873654	0.405689	2.15351	0.0312789	0.15444	No
Dipodascaceae	5.51984	0.883073	0.543322	1.62532	0.104094	0.283568	No
Trichocomaceae	7.9153	0.989116	0.384892	2.56986	0.0101741	0.100469	No
Trichomonascaceae	16.7924	1.0259	0.435956	2.35322	0.0186119	0.110037	No
Tuberaceae	26.8099	1.04497	0.532573	1.96211	0.0497494	0.197818	No
Abrothallaceae	1.8743	1.09955	0.625141	1.75888	0.0785981	0.238817	No
Mixiaceae	1.9534	1.1386	0.512766	2.22051	0.0263839	0.138955	No
Stereaceae	3.88992	1.18883	0.437608	2.71664	0.00659477	0.0744267	No
Olpidiaceae	17.4395	1.26238	0.675742	1.86814	0.0617423	0.21993	No
Pyronemataceae	54.2265	1.3113	0.669276	1.95928	0.0500804	0.197818	No
Hysteriaceae	1.02933	1.32504	0.634746	2.08751	0.0368417	0.161694	No
Tubeufiaceae	3.01143	1.37128	0.587063	2.33583	0.0195001	0.110037	No
Cladosporiaceae	2.04708	1.74439	0.593237	2.94047	0.00327717	0.064724	No

## Sheet: DESeq2_fungiFamily_NvsCont
	baseMean	log2FoldChange	lfcSE	stat	pvalue	padj	Significant
Agaricaceae	6.96816	2.52298	0.712228	3.54238	0.000396535	0.00284784	Yes
Abrothallaceae	1.8743	2.77276	0.945796	2.93167	0.00337143	0.0115801	Yes
Serpulaceae	2.43442	3.09366	0.93978	3.2919	0.000995117	0.0056153	Yes
Tubeufiaceae	3.01143	3.45051	0.889366	3.87974	0.000104569	0.00103261	Yes
Tuberaceae	26.8099	3.7418	0.588277	6.3606	2.00965e-10	7.93812e-09	Yes
Claroideoglomeraceae	27.25	4.45351	1.65178	2.6962	0.00701363	0.0213107	Yes
Olpidiaceae	17.4395	4.5239	1.03597	4.36682	1.26071e-05	0.000164882	Yes
Glomeraceae	262.057	5.92557	0.979244	6.05116	1.43803e-09	3.78681e-08	Yes
Pyronemataceae	54.2265	6.89414	0.888406	7.76013	8.48426e-15	6.70256e-13	Yes
Leptosphaeriaceae	131.127	-1.54298	0.551318	-2.79871	0.00513066	0.0162129	No
Ceratocystidaceae	6.79222	-1.53402	1.37566	-1.11511	0.264801	0.337408	No
Phaeosphaeriaceae	8.10199	-1.3527	0.552083	-2.45018	0.0142784	0.034096	No
Debaryomycetaceae	7.12136	-1.33286	0.625873	-2.1296	0.0332045	0.0624561	No
Nectriaceae	3725.07	-1.23517	0.908583	-1.35945	0.174005	0.249935	No
Glomerellaceae	81.8957	-1.16214	0.318974	-3.64336	0.000269103	0.00212591	No
Pleosporaceae	116.541	-1.15289	0.512508	-2.24951	0.0244799	0.0508923	No
Sporocadaceae	12.0157	-0.946613	0.326641	-2.89802	0.00375522	0.0123609	No
Malasseziaceae	156.074	-0.943668	0.404148	-2.33496	0.0195456	0.0428917	No
Plectosphaerellaceae	217.199	-0.813394	0.352742	-2.30592	0.0211151	0.0450836	No
Ophiostomataceae	54.373	-0.668539	0.22192	-3.01252	0.0025909	0.0102199	No
Aureobasidiaceae	21.1653	-0.627573	0.239413	-2.6213	0.00875947	0.024661	No
Lasiosphaeriaceae	25.8761	-0.62622	0.238672	-2.62377	0.00869625	0.024661	No
Coriolaceae	4.96632	-0.554747	0.631261	-0.878792	0.379514	0.434516	No
Cordycipitaceae	38.5627	-0.521885	0.235417	-2.21686	0.0266329	0.0539486	No
Botryosphaeriaceae	12.4111	-0.5162	0.31721	-1.62731	0.10367	0.167142	No
Togniniaceae	18.7809	-0.508284	0.287795	-1.76613	0.0773732	0.128939	No
Diatrypaceae	11.096	-0.499807	0.347499	-1.4383	0.150349	0.228416	No
Magnaporthaceae	31.3364	-0.428941	0.269157	-1.59364	0.111016	0.175405	No
Sordariaceae	49.7364	-0.401505	0.227933	-1.76151	0.0781526	0.128939	No
Clavicipitaceae	31.6816	-0.371792	0.304635	-1.22045	0.222294	0.297648	No
Microascaceae	34.6628	-0.273934	0.21419	-1.27893	0.200921	0.273668	No
Hypocreaceae	62.0328	-0.18482	0.28979	-0.637773	0.523621	0.559001	No
Teratosphaeriaceae	2.96015	-0.140935	0.547351	-0.257485	0.796804	0.8175	No
Chaetomiaceae	35.7479	0.0349912	0.220316	0.158823	0.873809	0.873809	No
Verrucariaceae	3.11438	0.110781	0.663591	0.166942	0.867415	0.873809	No
Aspergillaceae	111.311	0.168017	0.253107	0.66382	0.506805	0.551256	No
Ustilaginaceae	36.2442	0.202499	0.372386	0.543787	0.586588	0.617873	No
Schizophyllaceae	7.86414	0.297197	0.578573	0.513672	0.607481	0.631461	No
Sympoventuriaceae	10.2631	0.429999	0.532333	0.807762	0.419227	0.471905	No
Marasmiaceae	3.82462	0.483486	0.732787	0.65979	0.509389	0.551256	No
Cyphellophoraceae	8.90195	0.499114	0.370085	1.34865	0.177451	0.250332	No
Saccharomycetaceae	29.9803	0.562494	0.60929	0.923196	0.355905	0.426008	No
Sporidiobolaceae	6.54456	0.606413	0.50475	1.20141	0.229592	0.302296	No
Arthrodermataceae	8.44206	0.60663	0.432761	1.40177	0.160985	0.239959	No
Trichosporonaceae	5.20594	0.618366	0.589939	1.04819	0.294553	0.363589	No
Polyporaceae	8.42996	0.623788	0.619527	1.00688	0.313994	0.381623	No
Metschnikowiaceae	4.05603	0.676494	0.760913	0.889055	0.373973	0.434516	No
Punctulariaceae	3.25834	0.700672	0.876608	0.799299	0.424117	0.471905	No
Phanerochaetaceae	3.2271	0.756984	0.860707	0.879491	0.379135	0.434516	No
Mycosphaerellaceae	24.5299	0.837422	0.336089	2.49166	0.0127146	0.0334819	No
Gloeophyllaceae	4.81368	0.855941	0.72164	1.18611	0.235581	0.305096	No
Coniophoraceae	3.97303	0.897279	0.701223	1.27959	0.200689	0.273668	No
Cladosporiaceae	2.04708	1.01014	0.958571	1.0538	0.291973	0.363589	No
Herpotrichiellaceae	157.021	1.11547	0.321162	3.47322	0.000514244	0.00338544	No
Auriculariaceae	2.41687	1.19736	0.866498	1.38184	0.167022	0.244347	No
Helotiaceae	8.5515	1.22771	0.516925	2.37502	0.0175479	0.0396082	No
Bondarzewiaceae	7.9817	1.24111	0.626119	1.98223	0.0474532	0.0871399	No
Trichocomaceae	7.9153	1.30957	0.529609	2.47271	0.0134093	0.034096	No
Sclerotiniaceae	35.3528	1.33874	0.424977	3.15014	0.00163191	0.00731803	No
Phaffomycetaceae	4.30968	1.44934	0.823309	1.76038	0.0783429	0.128939	No
Dermateaceae	12.5266	1.50652	0.479196	3.14385	0.0016674	0.00731803	No
Stereaceae	4.87957	1.57912	0.722992	2.18414	0.0289519	0.05718	No
Tremellaceae	12.6927	1.59545	0.512903	3.11063	0.00186686	0.00776222	No
Tilletiariaceae	2.60138	1.60876	0.753423	2.13527	0.0327392	0.0624561	No
Psathyrellaceae	5.63159	1.64199	0.836109	1.96385	0.0495475	0.0871399	No
Hymenochaetaceae	5.88108	1.75356	0.717871	2.44272	0.0145769	0.034096	No
Ajellomycetaceae	9.55511	1.75561	0.512461	3.42584	0.000612911	0.00372461	No
Spizellomycetaceae	9.34725	1.86027	0.574576	3.23763	0.00120525	0.00629187	No
Hysteriaceae	1.02933	1.95241	0.994562	1.96308	0.0496367	0.0871399	No
Pneumocystidaceae	1.48499	2.01491	1.31971	1.52678	0.126814	0.196438	No
Schizosaccharomycetaceae	16.5521	2.05846	0.473731	4.34522	1.39138e-05	0.000164882	No
Mixiaceae	1.9534	2.07061	0.793321	2.61005	0.00905277	0.024661	No
Pseudeurotiaceae	4.27319	2.19164	0.680273	3.2217	0.0012743	0.00629187	No
Trichomonascaceae	16.7924	2.25426	0.520076	4.33449	1.46098e-05	0.000164882	No
Lichtheimiaceae	11.346	2.25592	0.618563	3.64703	0.000265291	0.00212591	No
Melampsoraceae	3.52353	2.2786	0.769145	2.96251	0.00305141	0.0109573	No
Dipodascaceae	5.51984	2.30384	0.768432	2.9981	0.00271668	0.0102199	No
Ceratobasidiaceae	6.7311	2.35127	0.963508	2.44032	0.0146742	0.034096	No
Orbiliaceae	24.6135	2.49381	0.430734	5.78967	7.05238e-09	1.39285e-07	No
