# Supplementary material for: Tomato RNA-seq Data Mining Reveals the Taxonomic and Functional Diversity of Root-Associated Microbiota
Source: Microorganisms. 2019 Dec 24;8(1):38. doi: 10.3390/microorganisms8010038 (PMC7022885; doi:10.3390/microorganisms8010038)
Supplement: Supplementary file 1 [file microorganisms-08-00038-s001.zip › Table S2.xls]

## Sheet: counts_COGs
	BAL_R1	BAL_R2	BAL_R3	BRO_R1	BRO_R2	BRO_R3	BCONT_R1	BCONT_R2	BCONT_R3	CAL_R1	CAL_R2	CAL_R3	CRO_R1	CRO_R2	CRO_R3	CCONT_R1	CCONT_R2	CCONT_R3
COG0002	3	4	9	1	0	5	0	3	2	0	5	1	0	1	0	0	3	0
COG0003	2	7	6	2	3	2	0	3	2	1	0	1	1	3	2	1	1	0
COG0004	0	3	8	5	3	14	1	3	1	1	2	1	1	2	5	0	3	1
COG0005	2	6	8	0	2	0	2	4	1	0	1	0	0	0	0	0	0	0
COG0006	1	3	21	1	0	4	1	17	0	2	1	2	1	2	3	0	2	2
COG0007	1	6	4	2	1	0	1	55	1	0	1	0	0	4	4	2	2	0
COG0008	4	22	18	1	1	5	3	7	4	1	4	2	0	3	5	1	9	2
COG0010	2	8	13	4	1	30	2	6	0	0	6	3	4	7	13	1	4	0
COG0012	3	5	13	1	3	6	0	28	0	2	2	6	1	3	2	2	8	0
COG0013	4	16	6	1	3	2	3	10	2	0	5	3	2	1	1	0	5	0
COG0014	2	11	31	2	2	3	2	6	4	0	2	3	0	2	3	0	2	0
COG0015	1	6	3	3	0	4	3	8	1	2	6	0	1	2	4	2	4	0
COG0016	4	5	10	2	1	2	0	8	1	5	3	2	1	4	6	0	3	0
COG0017	16	19	22	2	1	5	0	92	3	2	4	2	2	4	3	1	0	0
COG0018	1	4	3	2	2	4	2	0	0	1	5	0	1	5	2	0	5	0
COG0019	7	14	8	7	3	4	2	17	4	0	5	1	1	7	4	2	4	1
COG0020	8	9	14	1	1	2	0	9	2	3	1	4	0	1	2	1	4	1
COG0021	8	20	38	5	1	10	2	31	10	5	10	4	5	13	13	3	8	2
COG0022	7	10	20	3	1	5	1	14	2	4	11	0	1	3	7	0	1	4
COG0023	9	15	5	3	4	10	1	27	4	8	5	6	7	8	11	0	2	1
COG0024	11	24	31	3	6	6	0	33	4	2	4	1	1	8	6	1	1	1
COG0025	4	10	19	2	2	3	1	12	2	2	1	1	0	3	0	0	1	1
COG0028	7	11	5	3	3	9	1	33	1	1	5	5	5	9	10	1	3	2
COG0029	2	11	9	1	1	0	0	1	9	0	4	1	0	0	3	0	2	0
COG0031	3	14	16	3	2	2	1	16	4	2	6	1	1	6	2	1	4	0
COG0033	9	26	61	11	3	9	3	16	11	1	9	6	2	10	8	0	1	0
COG0035	7	7	9	1	1	2	0	16	1	1	3	1	1	2	0	0	2	0
COG0037	2	9	8	2	3	5	2	2	3	0	0	2	2	2	1	0	1	0
COG0038	4	19	25	0	4	3	1	9	8	1	2	1	1	4	1	1	1	0
COG0039	11	12	37	8	6	10	3	118	6	11	6	4	8	7	15	1	16	3
COG0042	6	13	7	1	3	2	3	1	1	2	5	3	1	6	5	1	5	0
COG0044	6	12	3	1	4	0	1	51	3	4	0	3	2	4	5	1	2	1
COG0045	14	34	43	8	5	9	1	77	5	5	6	5	8	16	7	1	4	2
COG0046	1	8	9	3	2	6	3	11	1	2	3	3	1	1	9	1	7	1
COG0047	1	8	8	2	1	5	3	10	0	1	1	3	1	1	7	0	7	3
COG0048	37	91	101	26	14	75	6	38	12	83	58	66	30	113	73	0	21	6
COG0049	30	81	120	20	14	42	2	80	15	67	29	47	29	122	53	3	9	3
COG0050	7	10	9	3	3	7	1	14	3	8	3	7	2	12	6	1	8	3
COG0051	16	38	51	11	5	21	2	61	10	29	15	20	6	82	15	4	8	3
COG0052	18	61	79	14	9	30	0	39	29	21	21	18	7	68	27	3	16	5
COG0053	2	6	13	3	1	2	1	11	0	1	0	0	2	2	0	1	2	0
COG0054	6	11	11	1	1	2	0	12	1	2	0	1	1	1	2	0	1	0
COG0055	33	69	101	19	18	81	4	231	17	35	61	47	31	87	70	0	24	6
COG0056	33	33	29	8	8	50	3	165	6	30	20	32	10	28	37	3	15	7
COG0057	17	74	66	11	6	37	1	36	16	38	26	35	19	40	60	1	11	4
COG0058	5	15	9	1	1	12	3	255	2	10	8	10	6	8	9	0	4	2
COG0059	6	15	17	2	1	8	2	24	6	7	7	8	1	12	12	1	8	3
COG0060	1	8	9	1	3	8	2	11	6	4	3	2	0	3	8	2	8	1
COG0061	0	4	5	1	0	0	0	9	0	0	4	1	0	4	2	0	3	1
COG0065	2	11	11	0	0	6	2	8	1	4	4	3	1	8	4	0	3	1
COG0066	1	10	11	0	0	2	2	9	1	3	2	1	0	5	2	0	2	0
COG0067	8	19	13	7	5	7	2	36	4	2	10	1	4	6	11	2	8	0
COG0069	10	21	14	8	6	9	3	39	5	2	10	1	6	6	13	2	9	1
COG0070	10	18	14	7	5	8	3	39	4	2	11	1	4	6	10	2	7	0
COG0072	2	7	8	2	2	2	0	11	1	3	1	1	1	3	3	1	5	0
COG0073	4	22	22	2	3	4	5	5	2	3	4	0	1	12	7	1	11	0
COG0074	15	27	35	8	8	10	4	75	3	18	20	15	10	21	14	1	6	0
COG0075	8	5	6	0	0	1	0	13	2	0	0	0	0	2	0	0	2	1
COG0076	11	21	34	2	1	6	1	47	1	2	1	3	0	4	1	0	2	0
COG0079	4	6	7	1	0	2	1	7	3	1	4	0	2	4	3	0	4	1
COG0080	24	54	79	13	13	41	0	52	13	24	21	17	12	36	17	2	15	3
COG0081	31	55	96	17	19	45	7	75	19	26	28	20	8	94	20	2	18	6
COG0084	3	4	5	0	0	0	0	6	0	1	1	1	0	1	1	3	4	0
COG0085	5	24	17	10	4	11	5	19	3	4	7	17	7	16	13	3	7	6
COG0086	13	24	15	5	2	14	4	32	3	7	11	15	10	13	15	5	13	2
COG0087	44	94	145	28	12	62	7	133	20	66	57	36	20	110	45	5	15	8
COG0088	22	62	105	14	14	30	0	53	21	17	7	17	4	44	19	1	9	5
COG0089	12	32	68	7	10	19	4	33	12	11	11	13	4	23	10	1	6	4
COG0090	33	73	92	28	21	42	6	104	27	53	21	37	29	107	46	3	23	5
COG0091	20	70	107	8	8	32	0	58	20	12	7	14	3	83	11	0	10	1
COG0092	32	44	84	17	7	42	0	49	9	40	35	37	10	104	28	4	7	5
COG0093	28	46	56	13	10	31	2	36	11	38	20	26	7	96	23	2	12	3
COG0094	39	76	110	6	9	48	5	75	17	29	40	18	14	55	32	1	15	5
COG0096	17	43	58	16	12	34	0	56	11	23	23	33	12	36	33	2	13	3
COG0097	16	35	58	14	3	19	3	41	15	19	19	19	10	50	15	5	9	4
COG0098	25	62	111	17	10	39	2	79	17	44	23	21	17	54	39	2	10	4
COG0099	26	70	95	14	16	58	0	40	14	61	47	32	28	90	71	1	21	4
COG0100	14	49	64	11	5	33	0	25	10	31	23	20	7	53	35	1	11	4
COG0102	19	28	54	12	6	16	1	58	10	17	11	9	5	43	14	1	11	3
COG0103	19	31	51	6	8	17	3	39	4	21	20	14	5	62	20	2	2	3
COG0104	5	6	9	2	1	2	4	3	3	3	0	4	0	8	3	0	3	1
COG0105	25	74	73	20	3	84	1	27	14	88	55	77	58	93	96	1	13	2
COG0108	3	5	4	2	0	1	1	11	6	1	3	2	0	1	1	1	2	1
COG0110	1	5	8	0	1	1	0	1	1	2	1	0	0	2	4	0	7	0
COG0111	1	7	15	1	1	4	0	12	3	0	1	2	0	4	2	0	3	0
COG0112	13	18	20	1	2	3	0	18	6	7	4	3	3	11	9	1	4	0
COG0113	4	10	6	1	4	4	1	142	1	1	7	4	1	0	4	0	2	0
COG0114	4	9	7	3	2	4	2	20	2	1	11	3	5	7	8	1	2	2
COG0115	5	10	11	2	0	3	0	19	3	2	2	5	2	2	2	0	1	1
COG0119	16	17	16	7	3	13	1	11	3	10	9	4	7	8	15	0	3	0
COG0123	1	10	14	3	1	3	1	7	3	0	1	1	0	3	0	1	1	0
COG0124	3	7	9	1	0	3	0	6	1	5	0	0	0	2	1	1	0	0
COG0126	6	11	16	5	4	0	0	20	4	10	8	7	3	8	14	0	6	2
COG0128	0	4	6	2	2	6	1	9	1	0	5	1	0	4	1	0	0	0
COG0129	2	12	11	2	1	4	1	18	3	1	11	3	0	9	6	0	4	0
COG0130	4	4	4	1	0	10	1	20	2	1	2	3	1	3	4	0	2	1
COG0133	2	1	0	0	0	0	1	3	0	1	5	1	2	6	2	1	2	0
COG0136	4	3	3	0	0	1	0	9	1	2	2	2	0	4	2	0	5	0
COG0137	8	11	12	2	0	11	1	13	2	4	4	0	3	2	6	0	3	0
COG0138	4	7	10	2	0	1	1	10	2	2	2	1	0	6	5	0	5	1
COG0142	3	8	9	0	1	5	4	22	2	0	0	1	0	3	3	1	4	0
COG0143	1	9	13	3	1	4	5	8	1	0	1	1	1	6	6	1	6	1
COG0144	4	7	3	1	1	3	3	12	1	1	3	0	1	3	3	2	0	0
COG0147	3	7	6	2	0	3	0	8	2	2	0	5	1	3	4	2	5	0
COG0148	22	45	34	8	8	49	1	46	14	43	33	36	17	39	59	0	12	2
COG0149	6	12	9	3	0	8	2	28	4	7	5	5	3	6	5	0	7	0
COG0150	3	7	6	0	0	3	1	5	0	0	0	2	0	0	3	0	0	0
COG0151	2	5	7	0	0	5	1	4	2	0	1	2	2	0	1	0	1	1
COG0153	0	1	6	0	0	0	1	22	0	2	1	0	1	1	4	0	2	1
COG0154	7	17	9	2	2	2	3	107	3	1	3	2	1	2	9	2	2	1
COG0155	0	6	7	1	1	2	0	24	2	1	5	2	1	2	5	2	3	3
COG0156	4	19	21	5	7	7	2	44	5	3	7	3	0	10	2	0	3	1
COG0158	6	13	10	1	5	2	0	29	5	3	3	2	0	1	2	1	3	0
COG0160	3	9	12	1	2	2	0	6	0	2	1	2	1	5	9	0	5	2
COG0162	2	7	7	1	1	2	0	0	2	2	5	1	0	2	0	0	0	0
COG0165	4	5	13	2	3	7	2	13	4	3	2	4	1	5	7	0	3	0
COG0166	0	5	16	1	1	6	0	68	3	3	5	8	4	3	6	0	4	0
COG0167	0	0	6	1	0	1	0	5	0	0	0	0	1	1	0	0	1	2
COG0168	6	6	3	0	1	2	1	8	1	0	4	3	2	2	2	0	0	1
COG0169	1	2	7	2	0	3	0	8	2	0	5	1	0	0	2	2	4	0
COG0170	1	5	0	1	0	0	0	7	0	0	0	0	0	0	0	0	0	0
COG0172	2	6	12	1	2	4	0	14	3	10	5	1	7	4	10	2	2	0
COG0173	4	5	2	4	2	1	1	2	0	2	1	0	0	2	3	0	5	0
COG0174	41	78	46	17	18	119	9	119	10	15	46	13	17	37	31	5	14	9
COG0175	3	1	7	1	0	0	2	12	0	3	3	2	0	2	7	0	5	0
COG0176	9	23	27	5	1	5	0	35	6	10	12	9	2	8	8	0	4	2
COG0178	3	8	2	1	1	7	2	2	1	1	4	4	4	5	13	1	10	1
COG0179	9	14	19	6	4	5	0	85	4	0	0	3	1	1	3	1	1	0
COG0180	4	6	7	0	1	1	3	5	0	0	4	3	0	2	3	0	2	1
COG0183	25	52	66	6	13	20	5	214	6	6	6	11	2	14	11	1	10	6
COG0184	28	54	83	15	5	53	2	63	11	46	35	55	17	116	62	1	11	4
COG0185	28	54	66	25	14	54	2	89	8	64	41	43	24	66	60	1	12	3
COG0186	34	72	74	19	6	39	1	48	18	38	25	33	11	101	43	4	11	3
COG0187	5	13	7	5	1	7	3	14	1	5	8	5	3	5	8	0	6	2
COG0188	5	12	3	4	3	8	2	14	3	3	7	5	2	4	9	2	11	0
COG0190	2	12	6	1	2	1	1	6	0	2	0	2	2	3	1	0	3	1
COG0191	16	26	34	6	5	8	4	60	5	7	5	12	7	22	15	2	10	3
COG0192	11	15	15	8	1	6	4	18	6	13	13	8	1	18	13	2	5	2
COG0197	33	61	92	9	9	44	4	89	19	36	22	32	18	54	30	4	21	9
COG0198	9	30	56	11	1	12	0	30	8	9	6	6	4	13	3	1	6	0
COG0199	12	34	38	9	0	6	1	36	8	3	1	2	0	21	0	0	3	2
COG0200	28	53	105	19	15	26	0	40	17	35	24	32	17	83	41	2	11	2
COG0201	6	17	16	0	6	9	3	56	8	5	7	10	3	16	14	3	5	2
COG0202	6	7	5	2	1	0	3	9	0	3	1	3	0	7	2	1	4	1
COG0204	3	19	24	4	1	3	1	26	2	0	5	5	5	1	3	4	4	2
COG0206	4	10	7	0	0	0	0	1	1	1	4	3	1	0	1	0	4	3
COG0208	4	4	6	1	1	3	0	6	0	3	4	1	0	2	12	1	4	0
COG0209	6	8	5	2	0	6	2	13	2	4	7	4	7	4	10	0	4	0
COG0210	4	11	2	2	2	9	9	7	2	2	4	4	6	9	6	3	10	2
COG0214	7	5	6	4	3	7	0	11	0	3	5	1	3	6	9	2	3	3
COG0215	0	8	7	0	2	5	2	6	1	0	1	1	1	1	2	2	5	0
COG0221	10	33	21	6	1	25	0	47	12	27	18	25	14	17	22	0	8	0
COG0222	2	9	3	2	0	1	1	10	0	0	3	0	0	0	4	0	4	0
COG0224	8	15	18	6	3	9	0	47	3	2	4	2	3	12	6	2	5	1
COG0229	1	3	8	1	2	0	0	6	0	0	0	0	1	1	0	0	1	1
COG0231	15	22	55	11	9	23	4	18	9	8	16	14	5	24	18	2	7	4
COG0234	7	2	7	4	1	4	2	17	1	2	2	2	1	3	2	0	0	1
COG0236	0	1	7	3	2	5	0	11	2	1	3	1	0	2	0	0	5	0
COG0240	0	5	5	1	1	5	0	4	4	2	2	1	0	21	1	2	2	1
COG0243	1	8	2	2	2	0	6	3	0	3	5	6	1	6	10	3	8	2
COG0244	18	60	81	12	7	31	2	85	15	35	23	33	22	18	29	1	13	1
COG0246	28	14	13	5	5	5	0	34	2	0	4	5	1	4	1	0	0	0
COG0248	1	5	1	0	2	0	2	4	0	0	5	3	1	0	4	0	1	1
COG0249	1	11	1	4	1	2	2	12	3	2	3	2	2	6	2	2	6	1
COG0250	1	3	2	0	0	2	0	9	0	0	0	2	1	2	5	0	0	0
COG0251	1	5	26	2	0	5	1	10	1	2	0	2	1	3	1	0	3	2
COG0255	28	37	77	13	8	10	0	32	8	2	5	7	2	9	7	1	2	1
COG0256	23	54	105	7	10	35	2	58	12	33	27	27	7	45	23	3	8	2
COG0258	2	3	7	1	2	3	2	4	2	4	4	2	4	5	4	2	4	0
COG0263	0	13	30	2	2	5	2	6	4	0	0	1	1	0	2	0	1	0
COG0265	6	9	17	4	1	2	3	4	4	1	4	6	2	6	5	2	5	1
COG0277	19	25	56	11	2	9	5	70	8	4	7	5	3	7	12	2	8	2
COG0278	2	5	9	1	2	0	1	7	3	1	0	1	0	3	1	0	2	0
COG0280	1	13	14	1	2	2	4	7	3	1	10	3	2	3	6	3	7	3
COG0281	5	14	11	1	3	8	4	56	6	4	12	3	2	2	3	4	4	4
COG0282	5	3	3	0	0	0	1	117	1	0	2	1	0	2	3	2	3	0
COG0285	1	4	5	0	0	4	1	7	1	0	3	1	0	1	0	0	1	0
COG0288	2	3	7	1	0	3	0	7	1	0	3	2	0	1	4	0	2	1
COG0290	5	9	2	1	0	2	0	0	1	0	1	0	1	2	2	1	4	1
COG0293	1	6	17	3	0	3	0	3	2	5	4	0	1	1	1	0	0	1
COG0296	7	14	3	11	9	37	1	13	5	12	14	11	8	23	30	0	2	0
COG0304	7	26	25	4	1	6	2	25	4	3	8	2	2	2	5	3	4	4
COG0306	2	11	2	2	6	1	1	9	1	0	4	2	0	2	5	1	4	0
COG0307	3	3	6	1	0	1	5	22	2	0	1	0	0	0	4	0	2	0
COG0308	7	20	31	9	4	14	3	15	3	9	10	2	3	5	6	1	7	2
COG0316	6	6	2	0	1	4	0	21	0	2	0	1	1	0	0	0	1	0
COG0317	6	9	3	0	3	4	3	3	0	1	6	3	1	3	9	0	10	1
COG0318	10	37	51	10	10	13	12	84	9	2	9	13	2	13	22	7	13	3
COG0320	2	2	10	0	0	2	1	8	1	0	1	4	1	3	1	2	3	0
COG0323	4	5	2	1	2	3	1	2	2	0	2	1	3	0	1	1	7	1
COG0326	27	60	75	8	15	42	2	84	12	40	62	33	14	64	51	9	31	12
COG0329	6	8	16	1	2	1	2	26	2	1	2	7	2	1	2	1	1	2
COG0330	21	24	32	5	3	17	4	34	3	7	10	7	0	6	10	1	1	2
COG0331	6	12	14	3	1	2	3	55	3	3	3	3	3	5	4	2	3	4
COG0334	1	2	14	3	0	12	1	11	2	1	0	1	0	2	3	6	5	1
COG0337	1	3	6	2	1	5	1	9	2	0	3	2	1	2	2	0	1	0
COG0339	2	12	27	1	4	2	1	9	1	0	1	4	0	5	2	0	3	0
COG0340	1	5	5	5	0	2	0	2	0	0	2	0	0	2	2	0	1	0
COG0345	2	5	10	0	0	1	2	5	1	0	1	0	1	0	2	0	2	0
COG0346	0	3	4	0	0	2	1	10	1	1	2	0	0	6	3	0	5	0
COG0355	3	9	19	1	3	1	1	27	2	4	1	3	0	4	1	1	4	1
COG0358	1	4	0	3	0	1	0	0	3	1	5	0	0	1	7	0	5	3
COG0361	5	8	13	3	4	8	0	6	1	4	2	8	8	15	3	1	6	0
COG0362	11	20	53	5	6	22	3	43	17	16	10	14	6	38	19	1	5	1
COG0363	1	6	5	0	1	2	2	3	2	0	3	1	0	3	0	0	2	0
COG0364	8	14	18	5	3	11	0	17	5	7	9	5	7	6	4	0	5	0
COG0365	6	16	21	9	3	3	2	14	1	9	6	9	3	13	12	4	8	2
COG0366	5	10	3	5	5	6	5	25	3	2	7	2	2	4	13	1	4	1
COG0367	2	3	12	3	1	3	0	18	1	0	4	0	2	1	1	1	2	0
COG0369	6	17	27	4	3	4	0	144	2	1	4	3	1	6	3	1	1	2
COG0372	24	36	48	11	11	18	7	85	10	30	25	20	12	28	30	2	12	3
COG0376	21	25	32	7	2	9	3	707	15	3	4	1	5	2	2	1	3	2
COG0377	3	6	5	1	1	1	1	11	0	2	1	5	2	1	1	0	1	0
COG0378	2	9	4	1	4	5	2	10	1	3	7	2	2	6	9	0	2	0
COG0380	5	25	47	10	7	17	1	17	4	4	2	2	4	4	6	1	2	1
COG0386	4	9	30	1	1	4	0	8	1	0	2	1	0	13	5	1	0	0
COG0387	11	15	28	6	1	6	0	38	7	2	2	2	2	8	1	1	1	4
COG0388	1	15	8	5	1	4	1	36	4	0	5	3	1	2	2	2	0	2
COG0389	0	9	2	2	0	2	2	5	2	0	2	1	0	0	4	0	3	1
COG0398	3	13	9	2	1	1	1	4	1	1	0	1	0	0	0	1	1	1
COG0401	15	63	75	7	9	20	3	50	12	3	2	4	6	4	5	3	10	2
COG0403	2	9	5	1	1	0	0	3	0	2	3	3	0	3	6	0	0	3
COG0404	1	4	5	6	0	2	4	4	2	0	2	1	0	0	4	0	0	0
COG0406	7	18	12	2	3	2	0	46	2	3	8	3	1	8	5	1	2	1
COG0408	3	2	4	0	0	2	0	258	12	1	2	0	0	0	1	0	0	0
COG0412	6	12	13	1	0	1	1	29	1	2	3	1	0	1	1	0	2	1
COG0417	2	12	14	1	1	3	0	6	1	1	1	2	1	2	2	0	0	0
COG0419	3	8	5	1	0	3	2	0	2	0	5	0	1	2	4	0	7	0
COG0421	2	5	4	1	3	2	3	6	2	3	2	4	1	7	7	0	2	3
COG0423	1	5	6	1	0	2	0	11	1	1	5	4	0	1	3	0	2	1
COG0428	4	6	25	1	2	4	0	7	5	1	0	1	0	5	0	0	0	0
COG0435	6	4	17	0	0	1	1	22	3	2	1	2	0	0	1	0	1	1
COG0436	3	20	33	1	3	10	3	25	6	7	13	3	2	6	10	2	8	0
COG0438	31	30	26	9	15	19	5	54	2	11	33	18	5	11	15	8	13	2
COG0439	8	21	40	5	3	3	3	6	2	3	6	3	1	7	7	3	4	1
COG0440	3	6	6	0	0	1	0	22	0	1	0	2	0	0	1	1	4	0
COG0441	6	13	9	4	4	3	1	15	2	3	4	1	2	9	7	3	1	2
COG0442	4	7	9	2	1	3	2	14	1	1	1	2	0	7	5	0	3	0
COG0443	144	207	269	64	33	147	25	444	79	125	160	115	69	182	179	19	59	29
COG0446	4	17	17	7	0	4	0	119	27	3	1	1	1	2	3	1	2	1
COG0449	22	41	17	8	4	12	1	58	0	7	13	16	4	14	12	4	13	8
COG0450	12	25	22	2	2	5	0	39	9	20	13	17	9	17	26	0	9	3
COG0451	7	38	67	4	1	11	2	41	12	1	3	4	0	9	2	0	3	2
COG0452	2	10	8	0	1	1	0	17	2	2	3	3	0	2	2	0	3	0
COG0454	4	8	5	3	0	4	5	30	2	1	6	5	3	4	3	1	4	3
COG0457	6	20	23	3	1	3	1	26	5	2	8	3	1	5	1	1	4	1
COG0458	7	20	27	7	7	11	4	28	6	7	5	4	1	3	9	1	5	1
COG0459	27	81	106	16	18	37	5	103	18	29	29	24	12	34	23	2	12	4
COG0460	1	3	11	2	0	3	2	5	0	2	2	0	1	0	2	0	0	0
COG0462	6	15	15	2	2	2	1	9	2	2	5	0	2	2	4	1	4	1
COG0463	4	9	7	1	2	2	2	17	0	1	4	5	1	3	3	0	9	0
COG0464	23	76	92	9	10	25	2	65	14	20	24	17	13	21	12	2	8	5
COG0465	22	32	36	1	9	10	5	34	4	2	6	4	3	11	6	2	6	3
COG0466	9	10	13	2	4	8	1	26	2	1	8	1	2	4	2	1	2	1
COG0468	0	5	8	0	0	5	0	8	0	0	1	1	2	1	1	1	1	2
COG0469	3	20	29	5	3	14	0	15	3	1	3	6	4	12	2	0	0	1
COG0470	7	5	13	0	2	0	1	5	3	1	2	2	0	1	2	0	3	1
COG0471	5	7	4	5	2	9	0	10	0	1	5	0	2	2	3	0	1	0
COG0473	10	13	18	4	5	10	0	76	2	9	9	3	4	12	3	0	10	2
COG0474	150	214	268	61	58	134	9	652	59	28	51	34	26	78	62	14	24	15
COG0476	9	37	44	5	5	5	0	23	4	1	4	1	1	6	3	2	4	0
COG0477	43	88	130	23	25	51	11	299	12	11	13	22	10	17	12	3	10	8
COG0479	3	10	11	3	1	2	1	32	1	2	3	2	0	5	6	2	4	0
COG0480	41	76	83	29	22	63	6	121	21	40	40	27	21	51	31	3	23	7
COG0481	2	6	7	4	0	1	3	5	0	2	2	3	2	1	8	0	3	0
COG0484	20	51	67	11	6	8	5	69	12	2	3	3	1	6	5	4	5	0
COG0488	75	223	92	38	32	90	10	102	51	32	55	50	21	92	52	6	47	9
COG0489	2	12	7	2	0	5	0	6	4	1	4	0	1	2	2	1	1	0
COG0491	6	6	11	3	1	4	3	17	0	1	4	5	0	3	3	2	1	0
COG0492	2	7	3	1	3	1	2	6	1	1	5	2	1	1	1	0	5	2
COG0493	7	12	9	6	5	8	2	39	2	4	8	2	3	4	8	0	7	2
COG0494	5	13	6	1	1	4	0	13	0	3	2	1	2	4	6	1	6	0
COG0495	3	14	9	2	4	4	1	10	3	0	3	3	0	0	9	0	4	0
COG0498	0	7	4	1	0	5	1	5	1	3	0	0	0	0	4	1	3	1
COG0499	19	21	40	5	5	17	6	25	3	15	10	10	7	13	15	3	7	6
COG0500	5	14	14	0	2	6	3	16	1	1	6	1	1	1	6	3	5	0
COG0501	3	9	20	2	3	0	1	5	2	3	5	3	0	4	3	1	4	0
COG0502	2	7	4	2	0	2	2	12	2	1	3	0	0	3	0	0	0	1
COG0503	5	5	3	1	0	3	0	18	2	0	0	1	1	2	1	0	1	0
COG0505	6	22	24	8	5	4	1	14	7	1	2	6	7	6	4	1	6	1
COG0506	5	7	4	1	3	1	1	3	0	0	1	3	0	1	9	0	6	0
COG0507	4	3	0	2	1	2	5	184	5	1	1	1	3	4	5	1	6	0
COG0508	15	20	42	4	3	11	2	46	10	6	5	11	2	16	13	0	10	5
COG0509	3	3	6	1	0	0	0	12	3	0	0	1	0	1	2	0	1	0
COG0511	5	14	18	2	1	3	1	5	2	2	0	1	0	5	4	0	0	1
COG0512	2	5	2	1	1	2	0	14	0	0	0	0	2	1	0	2	1	1
COG0513	72	95	86	28	17	54	9	171	21	47	71	50	28	87	48	3	19	6
COG0514	2	11	13	0	1	2	1	2	2	1	0	2	0	4	5	1	2	1
COG0515	60	229	385	34	23	58	1	108	49	8	2	10	5	19	11	1	7	3
COG0516	6	12	9	1	1	5	1	4	6	2	9	4	1	3	5	0	3	0
COG0517	12	20	28	4	3	7	2	34	7	3	9	8	5	5	4	5	5	0
COG0518	4	11	5	2	3	3	2	15	1	2	3	2	1	3	4	0	1	1
COG0519	3	10	4	2	3	2	2	10	1	2	2	2	1	1	3	0	1	1
COG0520	5	11	15	0	2	4	0	4	6	1	0	2	0	2	1	0	0	0
COG0522	32	71	78	22	13	61	3	79	19	63	45	64	33	111	55	3	14	5
COG0524	5	6	11	1	3	2	1	19	4	0	1	0	2	5	2	2	1	1
COG0525	3	9	6	0	1	3	1	15	4	2	5	5	1	7	10	1	6	4
COG0526	18	65	114	16	8	15	5	123	15	4	7	7	4	14	9	3	7	2
COG0527	1	3	4	3	1	3	2	7	0	1	4	1	1	0	6	0	0	2
COG0529	1	1	7	1	0	1	1	10	2	1	0	0	0	2	1	0	5	0
COG0531	49	58	59	13	11	19	10	183	14	12	15	10	6	12	7	2	8	1
COG0532	4	20	9	2	3	6	5	15	3	0	7	2	2	3	4	0	11	3
COG0534	2	11	15	5	4	4	0	6	2	0	1	3	1	1	1	0	3	2
COG0537	1	6	8	1	2	1	1	5	0	0	0	1	1	3	2	0	2	0
COG0538	2	15	26	3	4	3	1	28	3	4	5	3	4	10	0	0	3	2
COG0539	13	20	7	0	3	8	1	3	2	3	3	3	3	3	8	0	4	0
COG0540	3	8	7	0	1	2	3	11	1	2	2	1	2	1	1	0	3	0
COG0541	3	7	2	0	1	0	0	5	2	3	1	2	0	1	0	0	2	0
COG0542	11	28	20	10	10	7	3	26	1	6	9	7	7	12	15	3	6	3
COG0543	7	12	19	1	1	3	3	50	6	1	0	5	0	7	2	0	2	2
COG0545	13	11	27	6	1	3	1	27	2	1	6	6	0	1	3	0	4	2
COG0548	5	5	8	1	1	4	1	4	5	0	6	1	0	2	4	1	3	0
COG0550	0	3	3	0	1	3	2	3	1	2	3	1	2	5	11	2	9	2
COG0552	2	8	7	1	2	0	0	16	3	2	1	1	0	1	6	0	1	1
COG0553	8	34	56	12	6	14	9	30	6	3	6	2	2	12	14	2	9	2
COG0554	19	25	38	9	17	7	1	9	1	5	3	5	1	1	4	0	1	1
COG0557	6	17	17	2	2	12	3	28	1	0	6	3	1	2	3	0	2	1
COG0558	0	2	11	1	0	1	0	13	0	0	1	0	1	0	4	0	1	0
COG0560	2	5	7	0	0	2	0	3	1	0	0	4	3	1	1	0	4	1
COG0561	6	2	7	2	1	4	3	12	4	2	1	1	0	1	4	1	4	0
COG0563	5	12	15	0	2	0	0	23	3	2	3	0	0	5	5	2	1	2
COG0564	0	5	3	1	1	3	6	3	0	0	1	1	2	3	4	0	2	1
COG0566	1	7	6	2	1	2	1	8	3	0	0	1	0	2	4	0	5	0
COG0567	8	20	22	8	3	14	6	37	7	6	6	4	6	10	9	1	9	3
COG0568	4	12	2	0	1	1	3	0	0	3	8	2	2	2	5	2	6	3
COG0571	1	8	7	1	3	0	0	4	1	2	1	0	2	1	4	0	1	0
COG0574	1	2	0	0	5	1	0	1	0	0	2	0	0	5	3	1	6	0
COG0575	2	5	12	1	0	2	0	5	1	1	8	4	0	4	0	1	0	1
COG0577	5	6	1	1	2	2	1	5	2	2	4	3	1	8	5	1	9	2
COG0578	8	23	15	5	4	4	0	2	0	1	0	2	0	2	5	0	4	0
COG0580	19	18	38	4	12	4	1	4	2	4	2	4	1	1	3	1	0	0
COG0582	2	3	0	1	2	3	5	2	0	1	9	2	1	6	7	1	9	1
COG0583	3	3	0	0	1	2	0	1	2	0	1	3	1	3	5	1	6	0
COG0584	1	3	11	0	2	6	0	5	2	0	0	0	0	2	2	0	1	0
COG0587	3	6	1	3	0	5	3	1	3	3	3	5	5	4	4	3	10	0
COG0591	0	5	0	0	2	0	5	2	1	1	1	0	0	2	6	1	7	1
COG0596	16	27	30	2	5	7	2	35	11	0	3	4	0	5	3	0	5	1
COG0598	1	5	7	1	1	3	0	11	5	0	4	1	0	1	1	3	5	0
COG0601	0	4	0	1	0	2	2	1	0	2	2	1	0	4	8	2	5	2
COG0604	16	30	55	6	0	11	2	99	14	2	1	9	8	6	1	2	5	1
COG0605	11	21	56	6	4	9	2	34	4	3	2	4	3	11	11	1	9	1
COG0612	17	28	39	4	7	8	4	89	8	3	12	7	2	13	9	1	3	1
COG0615	2	8	17	0	1	7	0	7	4	0	0	1	0	4	0	0	1	0
COG0620	12	19	52	7	4	19	2	71	7	11	4	4	10	24	12	0	9	1
COG0621	1	4	1	3	0	0	7	4	1	0	6	1	1	2	4	1	3	1
COG0624	5	18	35	5	1	11	2	24	8	3	2	6	2	3	6	0	14	3
COG0625	23	68	127	7	9	17	5	71	15	5	9	5	4	4	9	0	6	1
COG0626	6	22	7	3	2	10	2	10	4	4	3	5	4	6	1	0	2	2
COG0628	1	7	3	2	0	4	1	2	3	1	6	4	2	4	2	2	2	3
COG0631	16	75	87	7	10	10	0	50	10	4	2	4	2	2	4	4	1	2
COG0636	19	35	23	7	8	14	2	93	7	10	13	7	12	17	8	1	15	4
COG0637	9	2	1	1	1	3	1	6	0	0	2	1	0	1	4	3	2	1
COG0638	13	43	86	13	7	10	0	73	5	11	7	12	3	14	8	0	3	0
COG0639	14	40	49	9	8	20	1	43	9	24	19	10	6	24	19	0	7	1
COG0642	13	36	28	5	5	8	11	63	5	2	9	9	4	8	15	4	9	2
COG0643	4	5	1	2	0	1	3	1	0	2	2	0	1	7	5	0	4	1
COG0644	5	3	7	1	1	2	1	6	0	4	4	1	0	4	3	1	3	1
COG0646	3	6	3	2	0	0	2	2	0	1	8	1	0	2	4	1	5	0
COG0647	5	6	14	1	3	3	1	9	0	0	1	1	0	1	1	0	4	0
COG0649	4	13	8	4	0	6	1	28	1	9	4	4	3	5	1	1	5	0
COG0652	23	65	114	31	11	48	5	74	25	35	27	24	11	60	22	4	14	5
COG0653	0	9	6	2	1	4	4	2	1	0	9	2	2	4	2	0	4	1
COG0654	14	29	17	4	4	5	0	405	9	4	10	8	2	7	7	1	5	1
COG0655	9	14	50	1	3	5	1	47	12	0	0	1	0	4	0	0	1	0
COG0656	9	13	36	2	4	3	2	22	2	1	3	5	2	2	3	0	4	2
COG0657	2	21	25	3	4	6	1	19	4	1	6	1	2	0	6	2	4	0
COG0659	5	14	23	5	1	3	2	13	2	0	2	2	1	3	1	0	6	0
COG0661	6	9	10	2	0	4	1	24	1	2	1	5	3	4	2	0	6	1
COG0663	3	7	15	0	0	4	0	0	1	0	2	0	2	1	0	0	0	1
COG0664	1	26	26	0	4	6	0	23	5	0	4	1	0	1	1	0	4	0
COG0665	3	12	9	1	2	4	1	24	2	0	0	4	1	1	1	0	5	2
COG0666	21	114	215	19	11	27	0	29	9	1	7	2	2	0	1	1	0	2
COG0667	7	34	60	10	6	6	2	58	6	3	4	9	1	7	2	1	4	1
COG0668	4	3	5	2	1	2	1	8	1	1	2	2	0	2	2	0	7	0
COG0671	6	11	24	0	2	4	0	27	4	0	1	2	0	2	1	0	3	0
COG0673	8	14	15	3	3	2	2	15	0	2	3	4	2	1	2	3	2	0
COG0674	4	5	15	2	1	2	0	40	2	2	1	2	1	4	2	0	4	0
COG0675	2	35	5	1	2	2	2	15	3	2	8	7	2	7	4	2	12	0
COG0676	2	10	13	2	1	1	0	4	3	0	1	0	0	0	0	0	0	0
COG0688	2	5	6	0	0	1	0	15	1	1	3	5	0	2	2	0	1	0
COG0693	11	11	18	3	1	6	2	19	2	2	3	8	2	0	4	2	4	3
COG0694	8	8	8	2	1	0	1	2	0	3	1	4	1	2	0	0	1	0
COG0695	0	8	18	3	4	5	1	2	1	1	0	1	1	2	3	0	0	1
COG0697	5	18	39	2	4	8	1	22	5	0	6	4	1	5	0	0	0	0
COG0699	5	12	16	2	0	2	4	34	4	2	2	3	0	5	1	1	2	0
COG0702	0	9	15	0	4	0	0	21	2	0	2	2	0	1	3	0	4	2
COG0705	6	6	3	1	1	0	4	7	1	0	6	0	1	2	1	1	0	1
COG0706	1	9	5	1	1	1	5	3	2	3	1	1	0	2	0	3	5	1
COG0708	1	5	0	2	0	2	1	1	1	1	5	0	0	1	4	0	1	0
COG0710	0	4	8	2	1	3	0	9	1	0	2	1	0	0	0	0	1	0
COG0712	3	11	25	1	0	4	0	24	4	1	0	3	0	4	2	0	0	2
COG0715	1	3	11	0	0	0	2	11	2	0	4	3	0	1	2	0	1	0
COG0716	0	2	7	1	1	1	0	23	2	0	1	1	0	1	2	1	0	1
COG0722	1	6	9	2	2	7	1	18	1	2	2	4	1	3	7	2	3	1
COG0723	6	9	12	3	3	8	1	32	4	3	2	2	1	4	5	1	2	2
COG0724	21	21	27	6	3	10	0	47	6	2	4	5	4	7	9	4	1	1
COG0726	11	15	19	1	1	5	1	9	0	0	2	6	2	2	0	2	2	1
COG0733	13	5	5	2	1	2	1	0	0	1	0	2	0	2	2	0	1	1
COG0736	3	9	15	1	0	3	1	23	1	2	2	2	2	1	1	1	0	2
COG0737	2	8	11	2	0	3	1	8	2	1	5	0	0	4	2	1	1	0
COG0738	5	9	5	4	3	8	1	28	1	1	5	6	0	3	4	0	6	2
COG0740	1	11	6	1	2	2	4	6	0	1	4	0	0	1	1	0	3	0
COG0741	0	5	1	0	0	3	5	2	1	1	4	2	3	2	3	2	2	1
COG0744	2	5	1	0	1	2	4	2	0	0	4	3	1	4	10	0	10	1
COG0745	0	2	2	0	5	6	4	3	4	2	7	3	4	7	9	3	16	3
COG0747	2	7	3	1	0	1	6	2	0	5	5	0	0	7	11	1	4	2
COG0749	4	0	1	0	1	4	2	4	2	3	4	2	2	7	4	1	5	0
COG0753	6	16	22	5	0	5	1	4	3	5	4	5	5	7	12	2	3	1
COG0760	7	16	21	4	2	3	3	11	4	3	2	1	2	3	6	1	3	0
COG0768	6	7	0	1	2	1	5	1	2	1	5	0	0	2	4	3	7	3
COG0778	1	6	1	1	0	5	2	1	2	0	3	4	0	4	8	0	5	1
COG0784	9	9	2	1	2	3	2	48	1	4	5	1	1	5	7	0	7	1
COG0790	6	5	16	0	4	4	1	22	0	0	0	2	3	2	1	0	2	2
COG0804	0	9	11	5	2	20	0	2	0	1	7	3	1	5	12	0	1	0
COG0807	3	14	19	1	1	1	2	9	0	6	3	4	0	2	4	1	2	2
COG0814	3	10	27	3	2	3	1	14	6	0	1	1	2	2	4	0	4	3
COG0831	0	4	9	4	2	13	0	2	0	0	3	0	1	2	4	0	0	0
COG0832	0	8	10	5	2	13	0	3	0	0	3	0	1	2	4	0	0	0
COG0833	51	37	46	8	5	17	3	121	2	4	6	11	1	10	3	3	8	4
COG0834	0	2	0	2	1	2	4	2	0	1	6	2	1	4	3	2	6	0
COG0837	1	9	12	1	2	2	1	0	1	0	2	1	0	1	0	0	0	0
COG0840	2	2	0	2	2	1	6	2	2	2	3	2	2	5	9	2	6	1
COG0841	6	9	4	1	1	1	4	7	5	6	7	9	2	11	10	3	15	3
COG0842	39	61	98	13	11	28	4	244	20	5	8	8	2	20	5	4	4	2
COG0843	0	7	5	4	6	4	1	5	3	2	3	2	1	9	14	0	3	1
COG0845	2	6	4	3	0	2	1	0	1	1	1	2	0	6	3	1	3	2
COG0846	5	3	7	0	1	1	0	9	1	0	0	1	1	0	2	0	0	0
COG0847	0	9	1	1	0	1	1	7	3	0	5	1	0	0	3	2	1	0
COG0852	1	4	4	3	0	2	0	7	0	1	1	1	1	2	2	1	5	0
COG0857	2	8	15	1	1	0	4	4	2	0	1	2	1	2	3	0	2	1
COG0861	2	5	1	1	1	2	4	1	0	0	1	1	1	2	5	2	4	0
COG1003	3	9	5	1	1	0	0	3	0	2	3	3	0	3	6	0	1	3
COG1004	2	8	9	2	2	4	0	19	2	1	2	0	2	6	3	0	2	2
COG1009	2	3	0	2	6	3	1	4	1	2	3	1	3	6	6	1	10	4
COG1011	1	3	10	0	1	2	1	5	2	1	1	2	0	5	4	0	3	0
COG1012	51	93	106	17	9	22	5	130	14	18	21	19	11	22	33	10	23	5
COG1013	0	1	7	2	1	1	0	23	2	1	1	2	0	1	2	1	3	1
COG1017	3	2	2	3	0	0	1	927	21	1	0	3	0	0	0	0	3	0
COG1018	3	3	3	4	0	0	3	927	21	4	4	4	4	2	6	1	8	2
COG1020	4	6	3	5	2	5	1	26	3	1	5	1	2	4	1	1	3	2
COG1022	13	44	74	5	7	13	1	45	15	1	2	3	4	6	2	0	5	0
COG1024	19	40	71	5	6	4	1	81	9	7	10	3	4	12	11	3	4	1
COG1025	2	6	4	1	0	2	0	12	2	3	2	0	0	0	0	0	0	0
COG1026	1	3	6	0	1	3	0	18	1	1	1	0	0	1	0	0	1	0
COG1028	33	66	135	22	16	12	10	338	15	8	19	10	4	20	16	5	12	0
COG1034	9	9	4	2	2	3	0	43	2	5	2	5	1	5	4	1	4	0
COG1038	4	12	21	4	2	5	4	16	4	11	11	8	4	3	14	1	1	0
COG1048	23	42	40	12	12	30	3	83	11	16	9	11	5	22	17	6	13	5
COG1049	2	5	0	1	3	2	6	1	0	0	0	0	0	3	3	1	7	0
COG1052	98	60	52	11	15	18	4	174	9	7	13	9	5	3	5	1	7	5
COG1053	7	24	32	10	9	14	7	226	9	10	10	9	3	8	15	3	7	6
COG1061	4	6	3	2	0	2	2	3	0	1	1	1	1	5	2	1	1	0
COG1062	34	29	28	8	6	16	2	178	7	5	4	6	2	14	3	2	3	3
COG1063	23	217	59	8	14	32	5	29	3	3	8	5	2	4	8	4	7	1
COG1064	15	45	52	3	4	16	0	148	10	1	1	5	0	5	6	0	4	2
COG1071	3	25	28	2	3	6	2	27	1	2	3	2	1	8	5	1	4	1
COG1073	1	5	7	2	1	3	2	9	1	1	0	0	0	5	2	0	1	1
COG1074	2	4	0	2	1	1	1	2	2	1	9	1	4	2	3	2	8	0
COG1075	2	4	13	3	4	4	0	2	3	2	1	1	1	2	1	0	7	1
COG1080	1	0	0	1	2	3	1	0	0	1	1	0	0	5	5	1	9	2
COG1084	7	8	9	2	0	1	0	5	3	3	1	2	0	3	1	1	0	0
COG1087	0	4	0	1	1	2	0	13	1	3	2	0	4	5	4	0	3	1
COG1088	1	7	0	2	1	0	0	2	0	0	5	3	5	1	2	0	1	0
COG1093	5	4	5	1	1	0	0	5	0	1	3	0	1	2	2	0	1	0
COG1100	40	88	101	24	19	53	3	110	15	46	29	48	16	64	36	5	17	11
COG1104	3	13	10	2	1	3	2	11	1	1	6	1	1	5	6	1	3	3
COG1109	15	21	24	5	2	8	3	8	3	13	7	11	8	6	13	3	14	0
COG1112	5	19	23	5	2	6	1	9	2	0	5	1	4	2	2	0	4	0
COG1113	3	2	0	1	0	3	3	2	2	0	1	3	2	5	3	0	6	4
COG1126	0	7	1	0	2	3	2	1	1	1	5	1	0	1	0	2	5	1
COG1131	27	122	190	14	9	48	4	175	66	7	16	6	1	35	6	4	8	4
COG1132	22	66	81	14	8	19	9	82	16	7	16	11	4	27	16	5	12	6
COG1136	2	8	0	0	0	3	5	2	1	4	1	2	3	1	4	1	9	0
COG1143	0	3	11	2	2	1	0	12	0	1	2	1	1	4	2	1	2	1
COG1155	7	20	32	2	4	7	0	22	4	6	6	6	1	10	6	0	4	0
COG1156	5	17	22	5	6	11	3	21	2	13	6	10	3	3	9	0	2	0
COG1161	6	3	9	2	3	5	0	11	1	0	0	2	1	5	1	0	0	0
COG1163	1	2	6	0	0	3	0	5	2	4	0	6	1	1	2	0	2	0
COG1167	4	5	6	1	2	5	1	6	1	2	5	5	1	4	7	0	5	0
COG1171	6	10	7	2	0	4	0	12	1	0	1	2	0	3	0	0	1	2
COG1175	2	6	2	0	1	3	2	1	1	0	2	0	3	7	2	0	0	2
COG1185	7	9	3	5	0	5	1	2	4	1	2	2	1	6	6	1	7	3
COG1187	1	9	3	0	1	1	0	3	2	2	1	2	3	3	1	4	6	1
COG1190	2	7	7	2	0	4	1	21	1	5	3	6	1	3	8	1	7	2
COG1191	2	2	5	4	0	0	0	0	0	1	0	0	0	5	2	0	1	1
COG1192	3	3	1	4	1	1	5	1	2	1	2	1	0	3	8	0	1	1
COG1196	7	13	14	6	7	3	4	17	2	1	2	6	1	4	4	1	6	0
COG1197	1	9	0	0	6	3	1	1	0	3	3	3	1	5	1	1	8	0
COG1204	3	2	10	1	1	2	0	10	4	3	1	2	2	4	0	1	1	0
COG1208	8	9	27	7	2	2	2	30	2	2	6	0	2	4	6	0	0	1
COG1215	69	179	225	32	15	47	3	244	54	30	28	31	6	80	9	4	4	4
COG1219	2	12	10	4	1	0	0	5	4	1	3	3	4	3	6	1	3	0
COG1222	22	60	70	12	10	24	2	81	10	30	20	25	13	42	33	4	5	1
COG1224	3	4	8	2	1	1	0	10	0	0	1	0	0	2	1	0	1	0
COG1225	3	6	12	0	0	1	0	4	1	0	1	0	1	2	1	2	0	0
COG1226	2	10	8	1	0	2	2	4	3	0	5	1	2	6	1	1	3	1
COG1230	7	8	9	6	2	8	1	15	2	3	12	2	0	4	6	5	10	1
COG1232	0	3	3	0	1	1	0	17	0	2	5	1	1	0	3	0	0	1
COG1236	0	11	9	0	2	8	0	4	2	1	2	0	0	2	0	0	0	0
COG1241	1	12	18	0	1	6	1	16	0	2	1	2	2	3	2	0	0	1
COG1245	1	1	7	0	2	3	0	5	0	2	1	3	1	4	7	0	0	0
COG1249	13	35	29	9	4	16	8	51	18	2	10	4	6	11	16	0	25	6
COG1250	3	24	42	4	4	5	2	5	2	5	3	2	5	4	14	4	7	3
COG1251	1	2	2	1	0	1	1	330	5	2	3	1	0	3	2	0	6	0
COG1252	7	5	7	2	1	5	0	14	4	0	0	1	0	6	3	0	2	3
COG1253	5	4	17	0	5	6	8	3	5	1	5	3	0	2	6	0	8	0
COG1257	1	6	9	0	0	2	0	12	1	0	2	0	2	0	3	0	2	0
COG1260	7	8	17	4	2	5	2	49	0	2	1	1	1	8	4	1	3	3
COG1262	7	14	21	1	0	3	0	9	8	1	1	1	0	0	1	0	1	0
COG1263	1	2	2	2	2	6	2	3	2	3	5	1	3	4	3	3	4	0
COG1269	8	13	17	0	2	2	1	23	1	1	0	1	1	3	0	0	1	0
COG1278	11	15	11	3	3	4	1	1	2	1	1	1	3	12	2	0	5	2
COG1282	3	6	8	1	3	1	2	16	0	1	1	2	1	3	3	1	3	2
COG1287	0	8	15	0	3	0	0	11	1	2	3	2	1	5	3	0	0	0
COG1292	0	6	0	0	3	3	2	4	1	1	3	5	1	3	5	1	10	1
COG1301	2	10	8	1	1	2	2	2	1	0	1	1	0	1	1	1	3	1
COG1304	8	6	6	1	1	2	0	24	5	3	0	1	0	5	1	1	2	1
COG1308	3	20	26	1	4	8	0	22	3	4	5	7	2	16	7	1	4	0
COG1309	1	6	2	2	0	0	1	4	1	1	3	5	0	3	6	0	4	2
COG1310	8	16	37	5	3	8	0	16	3	8	4	7	2	13	2	1	2	1
COG1329	0	8	4	0	1	1	1	0	0	0	2	1	2	6	2	0	0	1
COG1358	54	145	206	44	26	101	2	140	23	87	65	53	25	100	57	11	25	8
COG1364	0	8	7	1	0	1	0	5	1	0	0	0	0	0	1	0	0	1
COG1368	1	9	19	1	0	1	1	3	4	0	2	0	1	0	1	1	3	0
COG1383	15	53	47	10	4	33	2	58	12	51	33	30	16	51	33	0	9	2
COG1390	1	5	11	1	1	5	0	9	1	3	2	2	0	3	0	0	0	0
COG1394	2	7	7	0	1	0	0	6	2	0	0	0	1	3	0	0	1	0
COG1398	11	20	14	2	5	12	6	33	4	4	8	5	5	9	6	2	2	9
COG1404	37	49	65	14	21	8	5	83	5	9	10	18	4	11	10	3	5	5
COG1409	1	19	35	4	4	3	0	5	7	0	2	1	0	1	0	0	2	1
COG1410	3	6	3	3	0	0	1	2	0	1	8	1	0	3	2	1	4	0
COG1448	20	18	24	3	4	4	3	124	4	5	0	3	2	4	4	0	1	1
COG1454	1	5	2	1	0	2	1	24	4	3	1	1	0	0	2	1	5	1
COG1471	34	75	104	18	11	50	1	103	19	35	25	36	13	59	35	2	14	4
COG1472	18	26	38	5	2	5	1	77	3	3	0	4	0	8	2	1	3	0
COG1488	2	7	11	3	1	2	2	3	10	1	0	2	0	2	2	2	3	0
COG1498	9	10	10	2	4	5	2	35	7	9	2	4	2	11	2	0	0	1
COG1501	7	23	33	1	2	10	1	3	1	3	3	1	0	2	2	1	2	0
COG1502	12	52	79	7	6	8	2	9	18	1	2	1	1	7	4	1	2	0
COG1503	4	7	6	2	1	0	0	7	1	4	5	2	1	5	4	0	2	0
COG1505	0	5	11	2	2	1	1	0	2	0	1	0	0	0	0	2	0	0
COG1506	2	7	13	1	2	2	0	18	0	1	2	3	0	0	3	0	1	0
COG1524	1	12	9	2	1	2	0	9	0	0	0	0	0	0	0	0	0	0
COG1525	2	1	6	0	3	1	0	6	1	1	0	1	1	1	0	0	0	0
COG1527	3	4	8	0	2	3	0	9	0	3	0	1	0	1	1	0	0	0
COG1530	4	5	1	1	1	1	0	2	1	1	5	1	0	11	3	2	1	2
COG1537	2	5	4	0	1	0	0	37	1	0	0	0	0	0	0	0	0	0
COG1538	1	4	0	0	1	2	5	3	1	3	3	5	3	3	2	3	5	1
COG1552	17	31	40	8	8	17	1	43	13	22	21	11	4	33	13	1	4	3
COG1562	5	7	4	2	1	0	0	12	0	0	1	0	0	0	0	0	0	0
COG1574	0	1	8	0	1	0	0	16	2	0	1	0	1	0	2	1	0	0
COG1594	1	3	9	2	0	1	0	12	0	0	1	0	0	0	0	0	0	0
COG1595	5	7	2	5	3	4	0	2	1	0	1	1	3	4	5	2	0	2
COG1597	2	13	21	1	3	1	0	6	5	1	0	1	0	1	0	0	0	0
COG1601	6	11	15	1	0	2	0	16	3	4	3	3	1	6	4	3	2	1
COG1609	5	4	3	2	2	7	4	0	1	5	3	3	3	3	4	1	10	1
COG1621	6	3	6	0	0	7	2	47	5	2	1	1	0	0	0	1	3	2
COG1626	0	11	5	4	1	6	0	16	4	1	6	1	3	7	0	0	2	0
COG1629	4	5	1	0	0	7	2	6	0	1	10	4	5	6	6	1	3	1
COG1631	25	70	85	16	9	60	2	25	9	43	23	42	21	47	45	0	10	6
COG1632	36	57	84	20	11	65	0	55	8	58	37	40	19	75	40	1	16	4
COG1635	1	1	9	0	1	3	3	18	0	0	2	3	0	4	2	0	0	0
COG1643	6	21	27	6	0	4	0	9	4	3	3	3	5	2	12	1	5	4
COG1648	3	2	2	0	0	0	1	65	1	1	3	0	0	5	3	2	1	0
COG1670	3	3	4	1	0	3	0	20	1	2	1	4	0	0	7	0	6	0
COG1674	1	6	0	2	0	1	0	2	2	0	2	2	0	6	6	0	5	0
COG1717	20	41	94	15	16	29	0	54	6	35	12	28	4	56	21	0	2	1
COG1718	1	12	12	1	4	2	0	3	3	0	1	0	0	0	1	0	1	0
COG1723	0	3	8	0	1	0	0	5	1	1	0	0	0	2	0	1	0	0
COG1727	23	42	125	9	4	25	0	46	11	11	5	7	2	11	9	1	2	0
COG1741	4	24	49	0	2	2	0	3	15	2	2	2	0	5	1	1	2	1
COG1748	5	6	9	0	0	1	0	10	0	4	1	0	0	2	2	0	1	1
COG1752	1	11	8	2	2	3	3	15	2	0	3	4	1	3	4	1	5	0
COG1785	0	3	3	12	4	16	0	4	0	0	7	0	1	11	13	0	1	1
COG1788	10	5	7	2	1	8	0	39	2	2	3	1	0	1	3	1	3	0
COG1804	3	6	5	1	1	1	1	5	3	0	4	2	3	0	4	0	3	0
COG1813	14	6	12	4	9	2	0	10	3	1	1	3	0	2	2	2	0	2
COG1816	2	7	5	2	0	5	0	10	0	1	2	0	0	2	2	3	2	0
COG1819	5	38	39	2	1	8	0	24	10	3	6	1	0	1	1	0	0	0
COG1840	2	7	3	2	0	4	0	2	6	3	0	0	1	6	1	0	3	0
COG1841	29	77	114	14	7	50	8	75	12	42	33	28	21	79	25	2	14	5
COG1866	62	43	36	33	18	52	2	192	4	12	16	11	10	17	18	5	7	13
COG1877	4	28	53	7	5	16	0	8	7	2	0	2	1	4	4	0	3	0
COG1881	1	1	6	0	3	2	0	9	1	0	1	0	0	2	0	0	0	0
COG1889	10	14	5	1	1	6	2	17	3	2	3	2	0	1	3	1	3	1
COG1890	58	139	217	31	27	83	0	126	52	74	49	44	28	128	63	2	22	1
COG1894	2	9	17	1	0	3	2	32	3	3	1	2	2	5	1	0	5	0
COG1902	11	26	32	5	1	5	2	37	6	3	4	2	2	6	7	1	5	1
COG1905	0	4	10	1	0	1	0	15	1	0	3	0	0	2	1	0	2	1
COG1911	13	46	68	10	13	25	0	32	11	13	14	12	4	45	7	0	9	2
COG1928	3	5	5	3	0	2	0	48	2	2	1	4	3	2	1	0	1	1
COG1932	2	7	7	0	0	1	0	6	1	0	3	0	0	0	1	0	0	0
COG1940	2	6	6	2	2	3	1	0	1	0	0	5	0	1	4	1	2	2
COG1957	1	1	5	2	1	1	0	7	0	0	0	1	0	0	0	0	2	0
COG1958	3	11	15	1	0	10	0	20	3	7	5	9	6	9	4	0	2	0
COG1960	17	57	83	11	11	21	8	51	6	15	12	13	5	33	30	5	14	9
COG1961	2	7	1	4	1	0	4	1	1	1	4	2	1	2	4	1	9	0
COG1972	9	5	3	1	3	3	0	15	0	0	4	0	1	1	1	0	0	0
COG1997	23	42	76	15	6	27	0	21	6	21	13	17	9	56	11	2	6	1
COG1998	6	5	5	5	1	6	0	11	2	8	4	0	2	3	5	0	1	0
COG2004	13	27	58	11	6	16	1	42	5	2	10	6	3	18	4	0	5	0
COG2007	36	84	161	20	15	40	2	78	18	29	25	16	6	84	14	2	10	4
COG2025	1	7	13	0	3	4	0	12	3	1	1	2	2	1	2	0	4	0
COG2030	8	14	21	7	4	7	3	235	4	2	3	4	1	9	10	0	1	3
COG2032	11	15	15	8	6	22	0	74	7	5	12	7	1	2	6	0	4	1
COG2036	94	140	75	46	25	159	5	295	18	200	148	138	82	116	175	2	15	10
COG2046	4	8	9	7	2	2	0	13	1	3	2	3	1	4	0	0	4	1
COG2050	3	5	0	0	0	1	0	3	0	0	1	0	1	1	10	0	1	0
COG2051	11	22	36	5	4	11	0	33	9	12	7	9	6	58	8	0	13	3
COG2053	3	21	19	7	1	16	1	11	4	23	20	14	10	35	16	1	8	0
COG2057	10	6	7	2	1	7	0	39	3	2	2	1	0	2	3	2	5	0
COG2058	19	50	85	15	8	17	5	65	7	10	6	8	7	2	8	1	4	3
COG2070	9	14	19	3	2	14	2	77	0	7	3	3	1	3	6	2	2	5
COG2072	5	4	8	2	2	2	2	24	3	3	3	2	1	3	1	0	5	0
COG2074	0	5	9	2	0	0	0	0	1	0	0	0	0	0	0	0	0	0
COG2075	23	39	69	11	6	16	1	39	16	13	14	13	6	55	10	3	7	2
COG2079	3	8	8	0	1	2	1	28	1	7	8	2	0	2	4	2	2	4
COG2084	0	6	18	1	1	2	0	11	1	1	4	3	1	1	5	3	0	0
COG2086	0	4	9	2	2	4	0	12	1	2	3	0	1	3	2	1	1	0
COG2092	11	13	33	5	3	3	3	20	3	1	4	1	1	3	1	0	1	1
COG2097	17	36	69	10	9	19	1	47	11	11	4	8	0	37	5	0	6	1
COG2101	5	10	6	2	1	4	2	19	0	4	2	3	2	6	5	1	3	0
COG2110	0	7	7	0	1	1	0	0	0	0	0	0	0	0	1	0	0	0
COG2114	0	15	13	0	3	5	1	10	4	3	0	0	0	1	0	3	1	0
COG2119	1	2	9	2	1	1	0	6	1	1	0	0	1	1	1	0	3	0
COG2124	20	33	64	7	8	10	3	586	11	8	6	7	0	0	2	0	0	3
COG2125	26	55	79	15	10	45	1	81	12	46	31	22	17	73	36	2	9	5
COG2126	16	26	82	8	6	14	2	45	4	6	1	4	0	20	5	1	6	1
COG2130	9	9	36	3	1	5	1	10	6	3	2	3	1	2	2	0	0	5
COG2132	7	9	10	3	3	2	7	9	4	1	1	3	0	1	6	0	3	0
COG2136	5	2	3	1	1	0	0	6	0	0	1	0	1	1	0	0	0	0
COG2139	9	41	96	15	12	27	1	43	11	20	18	18	4	61	11	1	5	3
COG2141	2	3	4	0	1	4	3	2	1	1	5	2	2	2	7	0	4	2
COG2147	17	48	90	18	10	33	2	31	16	23	7	21	4	87	18	0	10	6
COG2157	13	31	62	8	4	12	1	13	12	24	15	31	5	36	17	1	5	4
COG2159	5	3	5	0	5	1	0	5	0	2	0	0	0	1	0	0	1	1
COG2163	51	84	232	23	21	44	3	185	35	20	15	22	7	113	12	2	12	8
COG2167	11	18	49	7	3	12	1	21	6	7	7	7	3	9	11	0	8	1
COG2174	10	35	66	13	10	11	0	27	9	12	9	11	5	29	12	0	3	0
COG2175	0	5	8	1	4	4	0	11	1	0	1	0	0	1	0	0	0	0
COG2183	4	7	6	0	0	2	1	9	0	2	0	1	1	4	5	0	2	2
COG2186	3	2	0	1	0	1	1	1	0	0	1	0	0	3	5	0	7	0
COG2197	2	5	4	2	4	2	2	1	0	7	1	6	5	2	7	1	7	1
COG2202	4	20	15	4	4	1	3	14	5	1	3	5	1	2	1	1	1	0
COG2214	7	7	4	0	0	3	1	15	1	1	5	0	1	2	4	2	1	0
COG2217	8	19	12	8	2	12	6	15	7	5	8	5	3	3	16	4	9	0
COG2224	6	17	14	3	2	3	2	17	0	4	2	3	1	1	6	4	10	1
COG2225	4	13	22	1	2	6	0	9	1	0	5	3	1	5	5	1	3	2
COG2230	6	3	5	2	0	1	3	13	2	0	4	3	2	9	2	0	0	1
COG2233	2	1	1	1	0	1	3	1	2	2	3	0	0	8	7	2	4	2
COG2234	15	34	41	5	6	3	1	52	3	7	2	5	1	1	1	0	5	1
COG2238	6	31	61	8	7	16	0	22	14	4	3	7	3	34	3	2	6	1
COG2252	3	2	0	1	0	4	4	5	0	0	2	1	1	4	7	0	3	0
COG2262	5	6	1	2	1	1	0	1	0	1	2	0	0	2	1	0	3	0
COG2267	1	4	6	1	1	1	2	13	2	2	2	0	1	2	1	0	3	2
COG2268	14	6	0	3	2	1	0	0	0	1	3	1	0	2	0	0	0	0
COG2272	3	9	8	1	0	0	0	13	1	0	0	1	0	2	0	1	2	0
COG2273	9	32	61	5	4	8	0	32	7	1	4	0	0	4	1	1	3	0
COG2303	51	61	115	12	15	16	6	716	15	5	12	15	3	7	8	3	7	1
COG2319	6	10	31	2	0	3	0	8	7	2	1	1	2	1	1	0	2	0
COG2340	7	14	27	2	2	3	0	32	1	1	0	3	0	0	0	0	2	0
COG2352	6	7	2	0	0	2	2	1	0	0	9	2	1	2	1	2	7	3
COG2365	0	8	10	2	0	2	0	1	0	2	0	0	0	2	0	0	3	0
COG2451	14	23	42	9	4	15	1	19	5	3	2	8	2	38	4	0	14	2
COG2453	7	31	47	2	1	3	0	19	4	0	0	4	1	0	1	0	0	0
COG2513	1	2	10	0	1	0	1	5	0	0	1	0	0	1	4	0	2	0
COG2518	2	6	15	1	0	3	0	1	0	0	0	0	0	2	0	0	1	0
COG2609	1	7	3	2	0	0	4	1	0	5	2	2	2	5	4	1	4	0
COG2706	6	9	21	2	0	0	0	3	4	0	0	0	0	1	0	0	1	0
COG2723	11	17	39	4	2	5	2	6	2	2	0	1	0	5	0	0	0	0
COG2730	23	75	148	12	5	19	0	14	14	1	1	2	2	3	0	0	0	1
COG2755	6	13	18	3	4	4	0	3	3	0	1	2	0	4	2	0	1	0
COG2759	1	4	6	1	1	1	1	4	0	2	0	2	1	5	1	0	3	0
COG2770	0	3	2	2	0	1	5	13	1	0	1	5	1	3	1	0	0	1
COG2801	10	23	11	11	4	17	7	99	3	3	9	10	2	8	8	4	13	2
COG2826	3	7	2	0	1	5	1	1	2	1	2	0	1	4	9	0	7	3
COG2828	0	5	9	0	1	0	3	7	0	0	0	0	0	2	0	0	3	1
COG2838	1	3	2	1	0	0	0	1	1	1	5	3	3	2	5	1	4	0
COG2857	5	10	20	4	2	2	0	39	1	2	3	1	1	4	3	1	6	1
COG2866	10	9	8	6	2	7	0	7	0	0	0	4	1	1	2	0	1	2
COG2885	4	14	1	1	1	2	0	4	1	1	5	3	1	6	2	0	9	0
COG2890	1	5	1	0	0	1	1	0	1	1	2	0	0	1	5	0	4	0
COG2896	2	4	5	0	0	0	0	5	0	2	1	1	0	2	5	0	0	0
COG2897	4	4	14	3	0	3	1	7	0	1	0	2	0	4	4	0	0	1
COG2902	17	30	26	6	2	9	4	11	1	0	2	4	0	7	5	3	2	0
COG2930	13	33	59	6	3	3	0	24	6	0	0	2	2	0	2	0	1	1
COG2931	0	2	0	0	1	6	1	1	1	1	1	0	4	3	5	0	0	0
COG2937	0	5	4	0	0	1	0	5	0	0	0	1	1	1	4	1	3	1
COG2939	14	22	51	4	5	5	1	79	7	1	4	0	0	3	4	0	3	1
COG2940	7	13	43	4	2	4	0	15	8	4	1	0	1	1	0	0	0	1
COG3000	5	6	2	2	5	7	1	100	2	2	1	0	1	2	8	1	2	0
COG3104	3	7	26	4	2	12	5	38	4	3	0	4	0	2	5	0	2	1
COG3173	0	6	1	0	0	0	0	8	1	0	1	1	0	4	1	0	2	0
COG3175	5	0	3	0	0	1	0	7	0	0	0	0	1	0	0	0	0	0
COG3185	3	11	8	0	2	3	0	5	1	2	1	3	0	1	0	1	1	0
COG3217	0	9	9	2	0	1	0	2	2	0	0	1	0	1	1	0	0	0
COG3239	9	9	15	2	2	6	0	36	8	6	3	2	0	4	3	0	3	2
COG3250	2	4	13	1	3	2	6	6	4	0	1	1	2	1	2	1	3	0
COG3288	2	3	8	3	0	2	1	14	0	2	0	2	0	1	3	1	1	1
COG3293	7	4	1	0	0	0	4	5	1	3	2	2	4	6	8	3	11	2
COG3320	3	6	8	1	2	3	0	18	1	0	2	1	2	1	0	0	2	0
COG3325	14	13	11	2	2	3	0	624	27	1	1	1	0	2	0	0	1	0
COG3338	3	5	10	0	2	1	0	4	2	2	2	0	0	2	0	0	0	0
COG3384	2	1	3	0	0	0	2	25	6	0	1	0	0	1	0	0	1	0
COG3385	3	8	1	1	3	3	3	3	1	0	0	0	1	7	7	0	7	0
COG3386	9	19	39	1	7	3	0	19	9	0	1	1	1	2	0	0	1	0
COG3387	3	5	4	1	1	0	0	11	0	0	1	1	0	1	5	1	0	0
COG3425	8	16	8	1	2	1	0	8	3	0	2	0	0	0	3	0	1	0
COG3451	1	5	0	1	1	0	2	5	3	0	0	0	2	0	1	0	1	3
COG3464	1	0	0	1	1	3	2	1	1	4	5	0	0	7	3	1	3	1
COG3474	13	15	9	5	4	6	3	32	4	10	5	12	1	6	4	0	4	1
COG3485	13	16	7	3	2	4	1	292	2	0	1	1	0	1	4	1	0	0
COG3486	2	3	6	0	0	0	0	1	0	1	1	0	3	1	5	0	1	0
COG3491	5	8	24	2	1	2	1	13	2	0	1	0	1	0	1	0	2	0
COG3508	2	6	5	0	1	3	2	114	2	1	0	2	0	1	2	0	1	0
COG3509	2	7	6	0	2	2	1	0	0	0	0	1	2	4	0	0	1	2
COG3569	4	6	5	1	3	4	0	7	0	0	3	0	0	3	0	1	1	0
COG3590	3	4	7	0	1	3	0	1	0	2	5	0	0	0	0	0	2	1
COG3616	2	2	7	0	0	0	0	7	0	0	2	0	0	1	0	0	2	0
COG3634	0	6	0	0	0	0	1	2	0	0	1	1	0	0	5	0	1	0
COG3648	16	18	33	1	2	1	1	23	3	1	1	3	2	3	3	1	2	2
COG3675	7	4	10	1	3	1	0	0	0	2	0	5	0	0	0	0	1	0
COG3696	6	2	0	0	1	2	2	1	2	0	2	1	0	0	4	0	9	0
COG3733	2	3	6	0	0	2	0	55	0	0	1	0	0	3	0	0	1	0
COG3752	1	6	3	3	1	0	0	6	6	0	0	0	0	1	0	0	0	0
COG3774	4	3	5	1	1	1	0	24	0	0	0	0	0	0	1	0	0	0
COG3781	6	4	4	0	2	1	1	11	0	2	0	1	0	1	0	1	1	1
COG3791	12	10	14	3	2	3	0	32	5	0	0	2	0	5	1	0	2	0
COG3808	6	14	41	6	2	7	0	0	1	1	0	5	0	13	1	0	1	0
COG3812	1	1	7	0	1	0	0	6	0	0	0	0	0	1	0	0	0	0
COG3866	10	8	33	1	3	0	0	4	2	1	0	3	0	5	0	0	0	0
COG3869	1	10	22	1	0	3	0	0	2	0	0	0	0	1	0	0	0	0
COG3914	2	8	17	2	4	2	0	10	0	1	2	1	0	1	1	0	0	0
COG3934	3	3	8	1	0	1	0	0	9	0	0	0	0	0	0	0	1	1
COG3957	2	3	7	1	1	2	0	257	2	1	0	1	3	0	0	0	1	0
COG3961	4	8	6	2	3	0	0	231	11	0	0	2	0	1	0	0	0	1
COG3979	1	6	22	0	0	0	0	0	2	0	0	0	0	0	1	0	1	0
COG4122	3	13	29	2	3	5	0	2	4	1	1	0	0	0	1	0	2	0
COG4166	3	5	1	2	1	6	4	1	1	4	3	2	3	6	5	1	9	1
COG4221	0	4	8	4	2	1	3	6	1	3	2	1	1	2	1	0	7	1
COG4281	3	6	14	0	0	1	0	1	1	0	0	0	0	0	0	0	0	0
COG4284	22	45	73	14	6	17	2	42	19	11	17	13	4	19	15	0	7	3
COG4301	4	0	6	1	0	0	0	7	0	0	0	1	0	0	1	0	0	0
COG4352	13	35	107	5	6	14	0	53	21	14	6	8	5	44	4	0	2	0
COG4581	3	9	7	1	2	4	0	6	0	1	2	1	2	1	2	0	2	1
COG4630	2	6	8	0	2	1	0	3	2	3	1	0	0	2	0	0	1	0
COG4631	4	5	9	0	1	1	0	3	3	2	1	1	1	4	1	0	1	0
COG4677	0	3	16	1	0	1	0	11	6	1	0	0	1	0	0	0	1	1
COG4690	1	7	10	0	0	4	0	0	4	0	0	0	0	0	0	0	1	2
COG4770	2	9	7	1	2	1	1	4	1	0	3	2	0	1	2	1	5	2
COG4775	6	2	4	0	3	2	0	10	0	0	1	1	0	3	1	0	3	0
COG4799	5	32	47	1	3	6	2	7	5	3	2	3	0	15	10	2	2	0
COG4830	28	47	51	14	5	50	1	88	11	37	37	23	15	48	29	1	22	4
COG4870	26	58	119	4	7	6	0	0	14	0	3	0	0	6	0	0	0	0
COG4886	3	12	27	3	7	10	0	22	2	1	3	2	0	0	2	2	1	1
COG4901	9	10	17	7	4	5	1	69	7	10	13	3	4	8	6	1	6	2
COG4948	2	7	12	1	3	3	3	13	0	0	3	1	0	4	2	0	2	0
COG4981	3	6	11	2	1	0	3	28	1	2	0	0	0	1	1	0	1	2
COG4982	3	9	14	1	0	3	2	23	1	3	1	2	2	1	2	1	0	2
COG4992	6	18	13	17	12	24	1	7	1	2	13	3	4	10	11	0	2	0
COG5019	6	8	8	5	2	17	0	66	2	15	13	12	7	11	11	0	8	4
COG5020	1	4	8	0	0	1	0	16	1	0	1	0	1	5	2	0	0	0
COG5021	16	79	138	21	11	29	0	40	18	5	6	7	2	22	4	1	1	1
COG5022	32	101	156	15	9	37	1	87	31	6	16	7	7	16	3	3	1	2
COG5023	19	77	74	29	38	162	3	110	9	70	92	74	32	107	94	3	15	4
COG5024	8	5	7	1	1	1	0	19	0	0	0	0	0	0	2	0	0	0
COG5025	1	5	7	1	0	0	0	6	1	1	1	0	0	0	0	0	0	0
COG5028	6	12	12	3	0	2	0	28	5	0	1	1	0	0	0	0	1	1
COG5030	3	4	10	3	0	1	0	12	1	2	11	4	1	1	1	0	0	0
COG5032	3	25	63	5	3	3	0	12	7	3	2	4	1	1	5	0	0	0
COG5035	5	12	19	1	1	2	0	21	5	0	1	1	0	6	0	0	0	0
COG5037	5	4	1	0	2	0	0	27	2	1	0	1	0	0	0	0	0	0
COG5038	6	6	16	2	3	0	1	8	2	0	1	0	0	1	0	0	1	0
COG5040	18	58	75	27	20	73	0	50	15	30	40	32	13	73	45	0	7	2
COG5041	1	5	14	1	1	0	2	3	0	2	3	3	1	3	0	1	0	0
COG5043	9	42	99	3	3	12	0	4	5	0	3	2	0	1	2	0	1	0
COG5044	2	14	22	4	4	0	1	15	5	4	3	2	1	3	1	0	2	0
COG5045	13	24	55	5	3	16	0	20	6	11	12	8	4	39	5	0	15	0
COG5047	1	4	6	1	1	1	0	11	2	3	2	1	3	3	2	0	0	0
COG5048	60	48	61	11	12	12	2	229	4	6	9	4	4	16	5	2	0	0
COG5049	3	6	10	0	1	0	0	4	1	0	0	0	1	1	0	0	0	0
COG5050	2	13	15	0	2	1	0	9	1	0	0	1	0	0	0	0	0	0
COG5051	10	21	45	6	3	8	0	31	4	13	20	10	9	34	9	0	5	0
COG5052	7	36	59	1	3	2	0	17	6	2	1	1	1	3	1	0	2	0
COG5053	2	9	7	0	1	4	0	7	4	3	1	0	3	3	3	0	1	1
COG5058	1	7	11	2	1	2	0	10	1	0	1	0	0	1	0	0	0	0
COG5059	12	33	53	6	5	9	1	24	4	1	0	0	0	3	3	0	1	1
COG5061	0	3	9	2	0	1	0	44	3	0	1	0	0	1	0	0	0	0
COG5064	5	27	37	4	1	5	0	14	2	5	5	9	1	3	4	1	0	0
COG5069	14	49	57	5	6	16	0	18	12	5	4	4	0	6	3	0	2	0
COG5070	8	6	5	1	0	1	1	11	1	2	0	0	1	3	0	0	0	2
COG5071	0	7	13	1	0	1	0	10	1	3	0	1	0	7	0	0	1	1
COG5074	6	1	2	0	0	1	0	26	1	0	0	0	0	0	0	0	0	0
COG5076	6	17	20	5	5	3	0	38	3	1	3	0	0	4	1	0	3	0
COG5077	1	13	27	4	1	7	0	12	3	0	1	0	0	0	0	0	0	1
COG5078	16	41	55	14	12	15	1	51	5	27	19	16	5	31	13	3	4	2
COG5081	2	2	5	0	0	0	0	6	0	0	0	0	0	0	1	0	0	0
COG5082	6	10	13	1	1	4	2	36	0	2	5	4	2	3	2	0	0	2
COG5083	2	13	6	2	0	0	0	2	1	0	1	0	0	0	0	0	0	0
COG5092	0	4	10	0	0	0	0	5	0	0	0	0	0	0	0	0	0	0
COG5096	9	15	13	1	2	3	5	34	3	4	2	6	5	7	2	0	0	1
COG5099	1	4	7	0	0	1	0	16	0	1	3	0	1	0	2	1	0	0
COG5101	2	4	8	2	0	2	0	9	1	2	6	2	3	1	3	0	0	0
COG5102	0	13	24	0	0	2	0	4	2	0	1	1	0	0	0	0	0	0
COG5103	1	3	5	4	1	0	0	11	0	1	1	2	0	5	0	0	1	0
COG5110	7	8	23	3	3	2	0	15	1	1	1	0	0	5	0	0	1	0
COG5113	1	7	7	0	0	0	0	0	1	0	0	0	0	0	0	0	0	0
COG5116	3	8	9	2	0	0	0	9	0	0	2	0	0	1	0	0	2	0
COG5126	29	99	124	18	8	72	0	48	25	64	62	59	38	86	78	4	9	2
COG5127	0	1	12	0	1	1	0	13	2	0	0	0	0	0	0	0	0	0
COG5139	1	8	8	1	0	2	0	2	1	0	0	0	0	0	0	0	0	0
COG5141	1	6	15	2	0	2	0	1	1	0	2	0	2	0	0	0	0	0
COG5143	6	10	26	5	1	9	1	25	3	2	2	1	2	12	10	2	0	1
COG5147	4	34	66	9	4	7	0	6	3	0	4	0	0	3	1	0	0	0
COG5158	5	10	16	3	1	4	0	11	3	0	0	2	1	0	0	0	0	0
COG5159	5	11	16	5	4	5	0	13	3	0	0	2	1	1	2	0	2	0
COG5160	1	5	4	2	0	0	0	10	0	0	0	0	0	0	0	0	0	0
COG5164	3	6	8	0	0	1	0	8	1	0	0	0	0	1	0	0	0	0
COG5169	5	16	34	3	1	7	0	34	1	1	2	1	0	10	1	0	0	0
COG5170	1	3	5	0	1	2	0	8	1	7	6	3	2	1	3	0	2	1
COG5171	4	7	7	4	2	3	0	7	3	8	7	7	3	4	4	0	0	0
COG5176	1	6	10	1	0	2	2	28	2	1	6	0	1	2	3	0	0	0
COG5178	5	5	5	1	3	7	1	6	1	3	1	3	3	7	0	3	4	1
COG5179	0	5	4	0	0	1	0	6	0	0	0	0	0	0	0	1	0	0
COG5181	2	4	9	1	0	0	0	8	0	1	1	1	4	3	0	0	0	0
COG5183	1	5	7	1	0	3	0	4	3	0	0	0	0	0	0	0	0	0
COG5184	2	34	50	11	3	10	0	14	4	1	0	1	0	1	0	0	3	1
COG5186	2	9	12	2	0	1	0	4	2	1	0	0	0	2	0	0	0	0
COG5187	3	6	8	0	0	5	0	9	3	5	0	1	1	2	1	0	0	0
COG5190	6	11	12	3	0	3	1	31	7	2	8	0	0	1	2	0	1	0
COG5196	1	6	6	1	1	2	0	7	1	0	0	1	0	0	1	0	0	0
COG5201	1	9	16	5	3	6	2	10	2	6	10	7	2	12	4	0	0	1
COG5207	0	1	6	0	1	0	0	7	0	0	0	0	0	0	0	0	0	0
COG5209	1	3	12	3	1	1	0	1	2	1	5	2	0	2	2	0	1	0
COG5210	8	19	25	2	2	3	0	18	5	0	2	4	0	2	0	0	0	0
COG5215	4	6	3	1	0	7	0	9	1	0	3	0	0	2	0	0	1	0
COG5219	1	3	8	0	0	0	0	0	1	0	0	0	0	5	1	0	0	0
COG5231	2	7	12	2	2	0	0	5	0	0	2	1	0	0	0	0	0	0
COG5236	0	7	5	0	0	1	0	2	1	0	1	0	0	1	0	0	1	0
COG5239	0	8	9	1	1	1	0	6	3	1	0	1	0	1	0	0	1	0
COG5240	2	5	8	0	1	1	1	22	2	0	1	1	1	1	1	0	1	1
COG5245	8	30	74	7	3	8	0	19	9	1	3	1	1	1	2	0	0	1
COG5248	5	1	8	0	0	2	0	1	3	0	0	0	0	0	0	0	0	0
COG5253	10	43	74	9	6	15	0	10	12	2	2	5	4	12	1	0	0	0
COG5256	176	308	342	141	122	596	7	316	112	423	400	321	233	400	557	7	61	17
COG5257	2	8	16	2	2	8	0	11	0	3	5	3	0	8	6	0	1	0
COG5258	3	15	12	1	5	0	0	6	0	0	0	0	0	0	0	0	0	0
COG5260	2	20	16	4	1	4	0	6	1	0	0	0	0	0	0	0	0	0
COG5262	15	30	29	6	6	32	2	76	5	47	31	41	19	34	49	2	6	7
COG5265	5	10	19	3	0	0	0	7	5	2	2	0	1	1	0	0	0	0
COG5269	2	2	3	0	0	1	0	10	0	0	3	2	1	5	0	0	2	0
COG5272	67	133	180	41	36	92	4	139	41	101	86	122	44	210	102	12	30	9
COG5273	10	35	55	3	3	5	0	14	8	0	2	1	1	4	0	0	0	0
COG5274	24	28	23	6	5	26	10	112	4	11	13	4	5	10	15	1	2	14
COG5277	56	183	166	46	30	112	4	175	45	141	165	176	54	458	100	17	27	12
COG5281	2	5	4	3	1	4	0	0	0	0	6	1	1	6	1	0	0	0
COG5297	12	11	14	0	3	2	2	0	0	0	0	7	1	0	0	0	1	1
COG5307	2	8	15	2	2	3	0	19	3	3	1	2	0	1	0	0	2	1
COG5308	3	3	10	0	0	0	0	6	0	0	1	1	0	0	0	0	0	0
COG5309	17	23	45	5	2	4	1	91	36	2	2	3	0	6	0	2	0	1
COG5325	1	6	8	3	0	1	0	5	1	0	0	0	0	1	0	0	0	0
COG5329	0	3	14	1	2	4	0	19	3	0	0	1	1	4	0	0	1	0
COG5333	0	6	14	1	4	0	0	4	0	0	0	0	0	0	1	0	0	0
COG5347	3	9	10	1	1	3	0	18	5	0	1	1	0	2	0	1	0	1
COG5354	2	9	8	2	2	1	0	25	3	1	2	6	2	6	2	1	3	0
COG5391	10	23	24	6	3	4	0	40	1	1	0	1	1	1	1	0	0	0
COG5407	2	3	5	0	0	1	0	22	1	1	0	1	0	0	0	0	1	1
COG5408	4	1	0	3	0	5	0	7	0	1	4	0	0	1	1	0	0	0
COG5411	3	4	16	0	0	2	0	8	1	0	0	0	1	1	1	0	1	0
COG5434	2	2	11	0	1	3	0	8	0	4	0	0	0	1	0	0	0	0
COG5491	4	16	9	2	1	4	1	14	0	0	1	4	0	6	0	0	0	0
COG5498	2	9	33	4	1	2	0	21	6	0	2	3	0	4	0	0	0	0
COG5520	5	17	54	4	4	5	0	0	6	1	4	0	0	1	0	0	0	0
COG5524	5	3	9	0	0	1	0	73	0	0	0	0	0	0	0	0	1	0
COG5541	2	5	2	1	0	0	0	7	2	0	1	0	1	1	0	0	1	0
COG5560	4	9	15	1	1	1	0	8	2	0	0	0	0	0	0	0	0	0
COG5594	12	36	33	4	6	7	0	17	4	0	1	0	0	0	1	0	3	0
COG5596	1	2	5	2	1	0	0	8	0	1	2	0	0	1	1	0	0	0
COG5599	4	5	10	0	0	2	0	8	0	0	1	0	0	0	0	1	0	0
COG5636	3	5	10	0	0	1	0	36	2	0	0	0	0	0	0	0	0	0
COG5640	16	24	40	14	16	3	1	0	4	2	1	12	0	0	0	0	0	0
COG5647	1	7	18	2	3	2	0	16	2	3	1	1	0	3	0	0	1	0
COG5648	14	29	30	1	2	8	1	80	5	6	4	6	2	4	3	0	0	0
COG5656	5	5	9	0	0	3	1	6	3	0	0	0	0	0	0	0	0	0
COG5657	3	4	14	2	0	0	0	8	0	2	1	0	0	1	0	0	0	0
ENOG410XNMH	10	18	9	4	12	8	14	10	11	5	24	19	6	20	23	10	39	5
ENOG410XNMK	0	5	11	1	1	1	0	0	1	0	0	0	0	0	0	0	0	0
ENOG410XNMS	0	5	16	2	1	0	0	0	2	0	0	0	0	0	0	0	0	0
ENOG410XNMY	5	6	8	3	1	1	0	17	1	4	1	0	2	6	4	1	0	0
ENOG410XNNC	23	47	46	7	6	13	0	18	3	2	2	6	2	12	1	1	1	1
ENOG410XNNW	0	2	6	0	1	0	1	6	0	0	0	0	1	0	1	0	2	0
ENOG410XNNY	2	3	5	0	1	0	1	11	2	0	0	1	0	0	1	0	0	0
ENOG410XNP1	6	6	29	1	0	7	0	15	4	2	0	1	0	6	3	0	0	1
ENOG410XNP8	1	3	8	2	3	1	0	5	0	0	0	0	1	0	0	0	0	1
ENOG410XNPH	30	91	106	13	7	19	2	44	25	4	19	7	2	26	6	2	1	0
ENOG410XNPP	1	5	3	1	5	3	0	7	1	2	7	1	4	9	6	0	0	1
ENOG410XNQ0	1	6	7	2	0	2	0	19	3	0	2	2	0	1	0	0	0	0
ENOG410XNQC	0	11	13	4	1	2	0	3	2	1	0	0	0	1	1	0	0	0
ENOG410XNQK	71	128	188	41	31	61	16	939	17	13	21	27	13	45	23	5	9	5
ENOG410XNR8	9	7	17	1	1	2	0	17	2	0	0	1	0	1	0	0	0	0
ENOG410XNRB	1	5	8	1	0	2	0	1	3	0	0	1	0	0	0	0	0	0
ENOG410XNRM	2	6	6	0	0	4	0	15	1	0	4	0	0	0	1	0	0	0
ENOG410XNRS	9	36	22	5	3	31	0	27	8	43	28	44	23	48	49	0	4	3
ENOG410XNRX	3	15	27	4	3	1	0	0	1	1	0	0	0	0	0	0	0	0
ENOG410XNS4	5	12	2	1	2	1	0	1	0	0	0	1	0	0	0	1	0	0
ENOG410XNSX	1	5	8	1	0	2	0	8	0	0	0	0	0	1	0	0	0	0
ENOG410XNTI	11	12	5	2	4	7	1	24	1	5	6	0	1	1	1	0	3	1
ENOG410XNTS	3	10	19	3	3	4	1	17	1	1	1	3	0	1	0	0	0	0
ENOG410XNUK	1	2	7	0	0	1	0	4	0	0	0	0	0	6	0	0	0	0
ENOG410XNV7	15	35	43	3	5	4	1	68	7	3	2	4	0	0	2	0	4	1
ENOG410XNVQ	6	12	11	3	7	12	0	25	1	4	4	5	1	0	4	0	0	0
ENOG410XNW0	69	97	99	41	24	98	14	314	33	75	60	37	37	85	64	9	39	21
ENOG410XNWX	1	2	6	0	1	0	0	11	1	0	1	1	0	0	1	0	1	0
ENOG410XNXC	1	2	9	0	0	0	0	5	0	0	0	0	0	0	0	0	0	0
ENOG410XNXP	4	6	2	1	2	6	0	12	1	7	3	4	0	1	7	0	0	0
ENOG410XNY0	11	31	36	12	5	14	0	21	13	17	9	10	11	11	25	0	2	0
ENOG410XNYK	7	2	2	1	0	3	0	15	0	1	0	0	0	0	0	0	0	0
ENOG410XNZ9	8	21	29	5	1	9	2	30	5	0	0	1	0	5	1	1	0	4
ENOG410XNZC	2	4	6	2	3	0	0	53	2	0	0	1	0	0	1	0	1	0
ENOG410XNZV	3	6	7	3	1	5	0	11	1	5	2	7	0	4	4	0	0	1
ENOG410XNZY	4	9	25	1	2	6	0	44	4	5	2	1	2	0	1	2	3	1
ENOG410XNZZ	1	5	11	0	1	1	0	1	0	0	0	0	0	0	1	0	0	0
ENOG410XP01	4	11	14	0	2	4	0	10	1	1	0	0	0	9	0	0	1	0
ENOG410XP04	1	3	11	1	0	3	0	18	1	1	1	1	0	1	0	0	1	1
ENOG410XP06	0	12	16	0	1	2	0	1	0	0	0	0	0	2	0	1	0	0
ENOG410XP07	2	12	27	1	0	1	0	0	1	0	0	0	0	0	0	0	0	0
ENOG410XP0A	5	4	1	1	0	0	0	13	0	1	0	1	0	0	0	1	0	0
ENOG410XP0B	7	4	4	0	1	1	0	9	0	0	0	1	0	1	0	0	0	0
ENOG410XP18	1	9	8	0	0	0	0	0	0	0	1	0	0	0	0	0	0	0
ENOG410XP1E	4	15	7	0	1	4	0	19	5	3	1	2	0	4	2	0	1	1
ENOG410XP1S	10	14	11	7	1	5	0	44	2	1	4	3	0	4	1	0	0	0
ENOG410XP1U	0	2	0	2	0	1	0	8	0	4	2	1	1	0	5	0	0	0
ENOG410XP20	6	7	4	4	0	2	0	13	0	4	1	2	1	0	3	0	0	0
ENOG410XP21	1	10	14	2	2	1	0	13	3	0	2	1	1	1	3	1	1	0
ENOG410XP3K	4	17	23	2	1	1	0	11	3	4	0	0	1	5	0	0	1	3
ENOG410XP3S	1	8	16	3	1	4	0	0	1	0	0	0	0	1	0	0	0	0
ENOG410XP4K	1	4	2	5	2	14	0	9	0	1	5	3	0	3	0	0	1	0
ENOG410XP4Z	0	5	7	2	1	0	0	11	0	0	3	3	1	0	1	0	1	0
ENOG410XP67	8	1	16	3	0	3	0	19	0	0	0	7	0	2	0	0	2	0
ENOG410XP69	4	10	7	2	1	0	0	2	1	2	2	0	0	1	0	0	0	1
ENOG410XP7I	1	2	0	0	0	0	0	5	0	0	4	0	0	4	7	0	1	1
ENOG410XP7J	1	4	5	2	0	1	0	8	0	1	0	0	1	0	0	0	0	0
ENOG410XP7T	3	1	9	2	3	0	2	37	1	1	3	3	1	3	2	0	1	1
ENOG410XP7X	1	7	20	0	0	4	0	7	4	1	0	1	0	5	1	0	0	1
ENOG410XP92	1	4	10	1	1	0	0	12	2	0	0	0	0	0	0	0	0	0
ENOG410XP96	1	7	13	2	1	0	0	8	0	0	0	1	0	2	0	0	0	0
ENOG410XP9E	6	2	8	1	1	1	0	6	1	0	0	0	0	0	1	0	0	0
ENOG410XP9G	7	10	4	0	1	0	0	6	0	3	0	0	0	0	0	0	0	0
ENOG410XPAQ	20	19	14	2	4	5	3	17	0	3	1	1	0	5	0	0	0	1
ENOG410XPAX	0	6	5	1	0	1	0	6	0	1	0	0	0	0	0	0	0	0
ENOG410XPB2	0	2	7	0	0	1	0	5	0	1	0	0	0	1	0	0	0	0
ENOG410XPC8	5	28	59	1	5	5	0	0	14	0	0	0	0	0	0	0	0	0
ENOG410XPCC	2	7	16	1	0	1	0	11	0	1	0	1	3	0	0	0	0	0
ENOG410XPCJ	1	2	6	0	0	0	0	5	0	0	0	0	0	1	0	1	0	0
ENOG410XPCR	1	4	12	0	2	0	0	7	1	0	0	0	0	0	0	0	0	0
ENOG410XPET	2	10	12	3	1	2	0	7	1	1	1	1	0	0	3	0	0	1
ENOG410XPFS	4	6	8	1	1	1	0	10	0	4	3	5	0	2	3	0	0	0
ENOG410XPG9	3	1	8	1	2	1	0	12	0	0	1	0	0	0	0	0	0	0
ENOG410XPGP	20	21	23	3	8	21	1	39	6	13	27	14	5	22	14	3	3	2
ENOG410XPGU	0	8	6	1	0	1	0	1	1	0	0	1	0	0	0	0	0	0
ENOG410XPH1	3	11	23	1	1	4	0	23	4	4	2	1	1	10	1	0	0	0
ENOG410XPH3	4	6	17	1	1	2	1	5	1	0	0	0	0	1	0	0	0	0
ENOG410XPH7	1	6	3	2	1	2	0	11	0	1	0	0	0	3	1	0	3	1
ENOG410XPHY	5	3	0	1	0	0	1	19	0	1	1	1	1	1	1	2	0	0
ENOG410XPJT	1	7	13	3	1	4	0	10	1	3	4	3	0	3	2	0	2	1
ENOG410XPK2	1	3	6	0	0	0	0	13	0	0	0	0	0	0	0	0	0	0
ENOG410XPK4	2	5	7	1	1	1	0	2	2	1	0	0	0	0	0	0	1	0
ENOG410XPN7	7	9	23	0	1	1	0	0	5	0	1	1	0	3	0	0	0	0
ENOG410XPP3	2	9	10	0	1	3	0	4	1	3	0	1	2	2	0	1	0	0
ENOG410XPQ0	0	3	6	0	1	1	0	10	1	1	0	0	0	0	0	1	0	0
ENOG410XPQ6	6	7	11	0	1	3	0	7	1	0	0	0	0	0	0	1	0	0
ENOG410XPQ8	3	7	20	1	1	3	1	16	1	3	4	0	0	4	1	2	0	0
ENOG410XPQQ	1	7	4	2	0	3	0	12	0	0	1	0	0	0	0	0	0	1
ENOG410XPQU	3	8	13	0	1	1	0	1	5	0	1	1	0	0	0	0	1	0
ENOG410XPQV	2	2	5	1	0	1	0	6	1	0	0	0	0	0	0	0	0	0
ENOG410XPSE	4	10	18	2	1	2	0	0	2	0	0	0	0	0	0	0	0	0
ENOG410XPST	24	15	29	10	7	11	1	156	11	8	9	3	0	29	10	2	9	0
ENOG410XPSW	5	1	0	0	0	0	0	20	0	0	0	1	0	1	0	1	1	0
ENOG410XPT2	2	8	12	2	2	5	0	0	3	0	0	0	0	0	0	0	0	0
ENOG410XPTR	3	5	4	1	1	1	0	6	1	1	1	1	0	1	1	0	0	0
ENOG410XPTU	2	14	23	4	1	1	0	3	4	1	3	1	0	1	0	0	0	0
ENOG410XPU1	2	7	10	0	0	2	0	5	4	0	0	0	0	0	0	0	0	0
ENOG410XPUI	5	9	14	2	2	2	0	6	2	0	3	1	1	3	2	0	0	0
ENOG410XPUM	1	1	10	4	0	0	0	6	0	0	1	0	0	0	0	0	0	0
ENOG410XPUN	28	126	250	18	12	28	0	6	28	0	4	3	0	2	0	0	0	0
ENOG410XPV4	0	2	8	0	0	1	0	7	1	0	0	0	0	0	0	0	1	0
ENOG410XPVF	3	14	19	3	0	9	0	12	1	7	5	3	6	14	7	0	0	0
ENOG410XPVR	2	5	4	0	0	2	0	5	1	0	0	0	1	0	1	0	0	0
ENOG410XPXR	5	5	3	3	1	4	0	16	1	3	1	2	2	3	1	0	0	1
ENOG410XPYE	4	6	11	2	0	4	0	3	1	0	1	1	0	1	0	0	0	0
ENOG410XPYK	3	17	20	3	2	7	0	13	3	3	2	3	1	5	3	1	0	0
ENOG410XPZD	0	13	15	1	2	3	0	0	1	0	0	0	0	0	0	0	0	0
ENOG410XPZI	1	0	5	0	0	1	0	6	1	0	0	0	0	2	0	0	0	0
ENOG410XPZS	1	5	7	0	1	3	2	18	6	0	1	2	0	1	0	0	1	1
ENOG410XQ0D	0	4	8	3	0	0	0	39	1	0	5	3	0	0	2	0	0	1
ENOG410XQ1D	0	1	9	1	0	0	0	5	0	1	0	1	0	0	0	0	0	0
ENOG410XQ37	2	6	8	0	0	2	0	15	1	1	1	0	0	1	0	0	0	0
ENOG410XQ3E	11	4	7	2	1	0	0	9	1	0	1	2	0	0	2	1	0	0
ENOG410XQ3G	0	5	5	1	0	0	0	0	1	0	0	0	0	0	0	0	0	0
ENOG410XQ3Q	1	1	5	1	1	2	0	9	3	0	2	1	0	6	2	0	1	0
ENOG410XQ54	6	14	17	0	1	2	0	7	3	0	1	0	0	0	0	1	0	0
ENOG410XQ5A	0	5	11	4	3	2	0	6	0	0	2	2	1	2	1	0	0	0
ENOG410XQ5B	2	12	12	2	1	1	0	1	1	0	0	0	0	0	0	0	1	0
ENOG410XQ81	5	8	7	0	1	1	0	3	0	0	0	1	0	0	0	0	0	0
ENOG410XQ8U	0	2	4	0	0	2	0	7	1	0	4	5	0	1	2	0	0	1
ENOG410XQ8V	22	90	101	9	8	29	0	32	32	9	16	5	2	37	1	0	1	3
ENOG410XQAD	0	8	13	1	0	1	0	7	1	0	0	1	0	3	1	0	1	1
ENOG410XQAJ	5	7	8	3	1	1	0	9	3	1	0	3	0	0	0	1	0	0
ENOG410XQAP	1	5	6	0	0	2	0	8	2	0	0	0	0	0	0	0	0	0
ENOG410XQBB	0	7	7	0	1	0	0	2	0	0	0	4	0	0	0	0	0	0
ENOG410XQCQ	0	5	6	0	0	0	0	0	1	0	0	0	0	0	0	0	0	0
ENOG410XQDD	0	10	16	1	1	4	0	0	3	0	0	1	0	0	0	0	0	0
ENOG410XQFT	1	6	12	0	2	4	0	0	0	0	0	0	0	1	0	0	0	0
ENOG410XQGN	1	5	4	0	0	2	0	35	0	0	0	1	0	2	0	0	0	0
ENOG410XQGS	4	9	6	0	1	6	0	20	0	0	4	0	0	1	0	0	0	0
ENOG410XQGZ	14	49	59	15	7	24	3	84	7	30	24	25	12	33	29	3	8	4
ENOG410XQIG	2	2	7	2	0	1	0	4	7	1	0	0	0	2	1	0	0	0
ENOG410XQJW	2	11	15	2	3	3	0	7	0	5	3	1	1	1	4	0	1	0
ENOG410XQK5	1	1	7	1	0	3	0	7	1	3	1	2	0	1	4	0	0	0
ENOG410XQKJ	3	2	10	0	0	0	0	5	0	0	0	0	0	0	0	0	0	0
ENOG410XQMZ	0	8	11	0	0	2	0	0	1	0	0	0	0	0	0	0	0	0
ENOG410XQN1	1	9	13	1	1	0	0	0	1	0	0	0	0	0	0	0	0	0
ENOG410XQN5	10	20	27	1	2	7	2	26	1	11	7	9	1	17	5	0	2	2
ENOG410XQN9	3	2	5	0	3	2	0	22	2	2	4	4	1	9	1	0	1	0
ENOG410XQRP	0	2	6	2	1	1	0	1	0	2	0	3	1	6	0	1	0	0
ENOG410XQSD	0	2	6	0	0	0	0	7	0	0	0	0	0	0	0	0	0	0
ENOG410XQUQ	3	7	7	0	1	0	0	16	0	0	0	0	0	3	1	0	0	0
ENOG410XQUX	1	4	3	2	3	5	0	16	0	2	5	0	3	3	3	0	0	1
ENOG410XQVI	0	14	12	0	1	4	0	13	5	1	0	0	0	0	1	0	0	0
ENOG410XQVU	1	0	5	1	0	1	0	6	0	0	0	0	0	1	0	0	1	0
ENOG410XQVX	2	8	10	0	1	3	0	0	0	0	0	0	0	0	0	0	0	0
ENOG410XQVZ	0	7	4	1	0	1	0	9	0	0	0	0	0	0	0	0	0	0
ENOG410XQWV	1	7	5	0	0	0	0	0	0	0	0	0	0	0	0	0	0	0
ENOG410XQX6	1	1	8	1	0	2	0	5	0	0	1	0	0	0	0	0	0	0
ENOG410XQYD	0	1	3	0	0	0	0	6	1	6	0	2	0	1	0	0	0	0
ENOG410XQYH	5	3	3	2	0	7	0	11	2	1	1	5	2	4	0	0	0	0
ENOG410XQYU	2	5	2	0	1	1	0	14	0	0	2	1	0	1	0	0	0	0
ENOG410XQZZ	2	6	15	0	0	0	0	0	1	0	0	0	0	0	0	0	0	0
ENOG410XR0A	2	7	31	3	2	4	0	1	5	0	1	0	0	0	1	0	0	0
ENOG410XR1F	0	0	6	0	0	1	0	9	2	1	0	0	0	3	0	0	0	0
ENOG410XR4Q	2	6	4	2	0	0	0	25	0	0	0	2	0	0	0	0	0	0
ENOG410XR54	4	15	15	3	1	2	0	7	0	1	0	0	0	1	0	0	0	0
ENOG410XR5K	1	3	7	1	2	2	0	15	2	1	0	0	0	1	0	0	3	0
ENOG410XR5X	3	8	23	3	0	7	2	13	7	7	4	3	1	22	3	0	2	1
ENOG410XR6Z	3	5	15	2	0	2	0	0	4	0	2	0	0	0	0	0	0	0
ENOG410XR72	8	5	2	0	0	0	0	29	1	2	0	0	0	0	0	0	0	0
ENOG410XR7X	1	3	16	2	2	2	0	10	1	3	0	2	0	5	1	0	3	0
ENOG410XRAR	0	6	7	2	0	1	0	8	0	0	0	0	0	0	0	0	0	0
ENOG410XRBH	1	2	6	1	0	2	0	15	1	2	2	0	0	1	0	1	0	0
ENOG410XRBK	0	6	7	1	0	0	0	0	2	0	0	0	0	1	0	0	0	0
ENOG410XRCA	0	8	29	0	1	2	0	8	3	0	0	0	0	0	0	0	0	0
ENOG410XRFI	1	8	12	1	1	2	0	0	2	0	0	0	0	0	0	0	0	0
ENOG410XRH2	3	3	7	1	0	2	0	5	2	1	0	0	0	1	0	0	1	1
ENOG410XRHN	2	17	21	3	3	0	0	3	5	0	1	2	0	0	0	0	0	0
ENOG410XRI2	4	14	27	3	2	1	0	0	2	0	0	0	0	0	0	0	0	0
ENOG410XRI7	1	18	28	1	0	4	0	14	1	0	0	1	0	0	0	0	0	0
ENOG410XRKB	1	5	6	0	0	0	0	0	0	0	0	0	0	0	0	0	0	1
ENOG410XRKJ	0	0	6	0	0	0	0	6	0	0	0	0	0	3	0	0	1	0
ENOG410XRM0	4	7	14	0	1	3	0	0	0	0	0	0	0	0	0	0	0	0
ENOG410XRM1	3	7	8	1	0	1	0	14	0	1	0	0	1	1	0	0	0	0
ENOG410XRMJ	34	86	100	19	15	22	0	25	26	14	4	5	2	18	5	1	2	1
ENOG410XRN0	2	4	6	0	2	0	1	5	2	0	0	3	0	1	1	0	0	0
ENOG410XRQQ	0	6	7	1	1	2	0	8	1	0	1	0	0	4	0	0	0	0
ENOG410XRSD	1	6	8	0	0	0	0	6	0	1	0	0	0	3	0	0	1	0
ENOG410XRSP	1	0	7	1	0	1	0	7	1	0	0	0	1	0	0	0	0	0
ENOG410XRSQ	1	9	27	2	1	4	0	20	1	3	6	0	0	0	0	0	0	0
ENOG410XRT8	4	14	22	1	1	3	0	5	6	0	0	0	0	1	0	0	0	0
ENOG410XRU3	1	7	7	2	0	3	0	24	3	4	2	0	0	3	1	0	0	1
ENOG410XRU7	0	1	5	1	0	0	0	9	1	0	0	0	0	0	0	0	1	0
ENOG410XRVA	6	21	5	0	0	1	0	1	0	0	0	0	0	0	3	0	0	0
ENOG410XRWA	6	3	9	1	1	1	0	7	0	0	0	0	0	0	0	0	0	0
ENOG410XRWH	19	16	14	0	0	2	0	62	2	0	1	2	0	0	0	0	0	0
ENOG410XRWT	4	10	18	3	1	3	0	19	2	3	2	1	0	4	0	0	0	3
ENOG410XRWX	5	2	4	2	0	2	0	13	0	0	0	2	0	0	0	0	0	0
ENOG410XRX6	1	5	6	1	1	0	0	5	1	0	0	1	0	0	0	0	1	0
ENOG410XRXC	3	5	20	2	0	2	0	0	3	0	0	0	0	0	0	0	0	0
ENOG410XRXF	0	5	6	0	0	1	0	0	0	0	0	0	0	0	0	0	0	0
ENOG410XS04	16	8	1	2	2	6	2	67	0	0	1	2	0	1	3	1	1	1
ENOG410XS0P	5	27	56	0	4	5	0	6	4	1	1	2	0	5	1	0	0	0
ENOG410XS1H	0	4	9	1	0	0	0	7	1	0	0	0	0	0	0	0	0	0
ENOG410XS1Q	3	3	7	0	0	0	0	7	0	0	1	2	0	0	0	0	0	0
ENOG410XS23	3	5	8	1	2	5	0	10	1	8	4	2	1	4	10	0	0	0
ENOG410XS3C	2	6	6	0	0	0	0	3	0	0	0	2	0	0	0	0	0	0
ENOG410XS3S	6	4	11	1	0	0	0	0	0	0	0	3	0	0	1	0	0	0
ENOG410XS40	1	6	8	1	0	2	0	14	2	1	1	2	0	1	1	0	0	0
ENOG410XS4P	2	6	16	1	1	1	0	15	1	0	1	0	0	0	0	0	1	0
ENOG410XS4S	6	10	18	2	2	1	0	0	4	0	0	0	0	0	0	0	0	0
ENOG410XS5J	1	5	10	1	0	0	0	7	1	0	0	0	0	1	0	0	0	0
ENOG410XS81	1	6	5	0	1	2	0	4	0	2	1	2	2	0	2	0	0	0
ENOG410XS86	2	4	11	1	0	5	0	13	3	0	1	0	0	2	0	0	1	0
ENOG410XS8D	5	1	2	0	0	0	0	21	0	0	0	1	1	0	0	1	0	0
ENOG410XSBR	0	1	9	1	0	0	0	6	0	0	1	0	0	1	1	0	0	0
ENOG410XSC8	0	10	21	0	1	2	0	15	2	0	1	3	1	4	1	0	3	1
ENOG410XSE0	3	5	6	0	1	0	0	15	1	0	0	0	0	0	1	0	0	0
ENOG410XSGG	0	2	6	1	0	1	0	11	2	0	0	0	0	0	0	0	0	0
ENOG410XSHQ	1	11	18	2	2	1	0	2	7	0	0	0	0	3	0	0	0	0
ENOG410XSI5	3	14	40	2	0	5	0	0	1	0	0	0	0	0	0	0	0	0
ENOG410XSR9	4	5	8	0	2	3	0	10	2	0	2	0	0	5	0	0	2	0
ENOG410XSSD	1	2	11	0	2	0	0	163	1	0	0	0	0	2	3	0	0	1
ENOG410XSU6	4	8	15	3	0	0	0	0	0	0	0	0	0	0	0	0	0	0
ENOG410XSZD	0	1	5	2	0	0	0	5	0	0	1	2	0	1	0	0	0	0
ENOG410XSZW	2	6	3	1	1	0	0	7	0	0	1	0	0	1	0	0	0	0
ENOG410XSZZ	0	5	7	1	0	1	0	2	1	0	0	0	0	0	0	0	0	0
ENOG410XT40	0	5	9	1	0	1	0	1	1	0	0	0	0	0	0	0	0	0
ENOG410XTCJ	4	17	22	3	1	3	0	18	5	1	0	2	1	12	0	0	0	0
ENOG410XTG3	4	11	28	0	0	3	0	4	6	1	0	1	0	0	0	0	0	0
ENOG410XTGX	0	8	7	0	0	1	0	0	1	1	0	0	0	0	0	0	0	0
ENOG410XTHA	2	0	1	1	0	0	0	8	0	2	5	3	1	0	1	0	0	0
ENOG410XTI3	2	2	5	1	2	1	0	12	0	0	1	0	0	1	0	1	0	0
ENOG410XTIJ	2	5	7	0	0	0	0	4	0	0	0	0	0	0	0	0	0	0
ENOG410XTQ6	1	9	11	1	1	1	0	0	0	0	0	0	0	0	0	0	0	0
ENOG410XU94	9	4	10	0	1	0	0	39	0	0	0	0	0	0	0	0	0	0
ENOG410XUCG	0	13	18	1	2	2	0	6	5	0	0	0	0	0	0	0	0	0
ENOG410XUI5	1	2	6	1	0	1	0	6	0	0	0	0	0	0	0	0	0	0
ENOG410XVC4	24	25	16	1	3	2	0	88	1	3	1	4	0	2	1	0	1	0
ENOG410XVSZ	0	4	9	1	1	0	0	7	0	0	0	0	0	1	0	0	0	0
ENOG410XVV6	0	9	9	2	0	4	0	0	7	0	0	0	0	0	0	0	0	0
ENOG410XW3C	0	5	10	0	1	1	0	0	1	0	0	0	0	0	0	0	0	0
ENOG410XWED	3	9	21	0	0	1	0	1	3	0	1	0	0	0	0	0	0	0
ENOG410XWMU	4	7	21	1	1	8	0	0	1	0	0	0	0	1	0	0	0	0
ENOG410XWWT	1	10	15	3	1	1	0	2	1	0	0	1	0	4	0	0	0	0
ENOG410XXP2	2	6	4	0	1	1	0	5	1	0	1	0	0	0	0	0	3	0
ENOG410XXUP	6	53	52	7	7	22	0	0	11	0	0	3	1	18	0	0	0	0
ENOG410XXX7	5	6	4	1	3	1	1	10	0	1	0	1	0	0	1	0	0	0
ENOG410XXY2	4	11	36	0	0	4	0	0	9	1	1	0	0	1	0	0	0	0
ENOG410XYGT	9	4	3	2	0	0	2	4	2	0	7	0	2	0	2	0	1	0
ENOG410XYJI	6	7	7	0	0	0	0	16	1	0	0	0	0	1	0	0	0	0
ENOG410XZMQ	11	39	18	2	2	4	0	0	0	1	1	4	0	1	0	0	0	0
ENOG410XZUK	1	5	14	2	0	1	0	0	2	0	0	0	0	0	0	0	0	0
ENOG410XZX9	2	8	13	1	0	2	0	1	2	0	0	0	0	0	0	0	0	0
ENOG410Y0FY	1	3	7	1	0	2	0	7	0	0	0	0	0	0	0	0	0	0
ENOG410Y0R0	4	3	7	0	2	3	0	26	0	1	1	1	0	2	0	0	0	0
ENOG410Y0WV	0	1	1	0	0	3	3	0	0	1	1	0	0	1	20	0	9	0
ENOG410Y16S	13	11	12	8	8	34	2	28	2	12	15	20	8	35	22	2	8	4
ENOG410Y21X	0	1	0	1	8	2	0	0	0	0	0	0	1	5	2	0	0	0
ENOG410Y2UE	7	2	7	8	5	1	0	0	0	0	0	8	0	0	0	0	1	0
ENOG410Y2V3	5	1	2	0	1	0	1	12	0	0	1	1	0	0	0	0	0	0
ENOG410Y37E	5	2	0	0	0	0	0	8	0	0	4	0	1	0	0	0	0	0
ENOG410Y3CW	1	5	15	0	0	4	0	9	1	3	2	0	0	2	2	0	0	0
ENOG410Y3MT	0	8	14	0	1	0	0	1	2	0	0	0	0	0	0	0	0	0
ENOG410Y3YU	3	9	13	2	2	1	0	0	2	0	0	0	0	2	0	0	0	0
ENOG410Y41C	17	5	5	3	3	4	1	11	0	4	0	1	0	1	0	1	1	0
ENOG410Y49V	0	1	10	0	0	1	0	9	0	0	0	0	0	1	0	0	0	0
ENOG410Y4E6	1	6	3	1	0	0	0	21	0	0	0	1	0	0	0	0	1	0
ENOG410Y4UP	0	8	7	1	0	1	0	0	0	0	0	0	0	0	0	0	0	0
ENOG410Y5IK	3	4	2	3	0	5	1	13	0	2	5	0	0	0	1	0	0	0
ENOG410Y5KA	0	5	12	3	0	0	0	0	0	0	0	0	1	0	0	0	0	0
ENOG410Y5WM	1	7	10	0	0	1	0	13	3	0	0	0	1	0	1	0	0	0
ENOG410Y6RP	0	5	7	1	0	0	0	0	0	0	0	0	0	0	0	0	0	0
ENOG410Y7DR	3	7	6	1	0	2	0	0	0	2	0	3	0	2	0	0	0	0
ENOG410Y7NN	5	6	4	3	1	1	0	67	1	0	0	0	0	0	0	0	0	0
ENOG410Y89V	3	1	5	1	0	0	0	8	0	0	0	1	0	0	0	0	0	0
ENOG410Y8EE	2	1	11	1	1	3	0	14	1	0	0	0	0	1	0	0	2	0
ENOG410Y8U4	0	8	8	0	0	0	0	0	0	0	0	0	0	0	0	0	0	0
ENOG410Y9AP	4	18	21	4	5	5	0	0	7	1	1	1	0	3	0	0	0	0
ENOG410Y9CF	1	20	14	0	3	1	0	4	1	1	0	1	0	1	1	0	0	0
ENOG410YA8Z	0	5	6	1	1	0	0	2	0	0	1	0	0	0	0	0	0	0
ENOG410YAMA	4	3	15	0	0	2	0	19	0	0	1	2	2	3	0	0	1	0
ENOG410YAN4	6	1	2	0	1	0	0	6	2	0	1	0	0	0	1	0	1	0
ENOG410YAUW	5	5	7	1	1	1	0	12	0	0	1	0	0	0	0	0	1	0
ENOG410YAYP	6	21	38	4	5	5	0	40	7	3	4	2	0	10	5	0	1	2
ENOG410YBNZ	7	20	10	3	2	7	1	21	2	3	0	3	0	0	0	1	0	0
ENOG410YBWE	4	4	10	1	0	0	0	172	4	0	0	1	0	0	0	0	0	0
ENOG410YC1M	0	6	2	1	0	1	2	10	0	0	0	0	1	0	0	0	0	0
ENOG410YCCP	7	11	14	6	2	3	0	26	0	4	4	4	0	5	4	3	0	0
ENOG410YCNW	2	12	9	2	0	1	0	0	0	0	0	0	1	2	0	0	0	0
ENOG410YD00	7	1	0	1	0	1	0	6	0	0	0	0	0	0	0	0	0	0
ENOG410YD2X	2	10	16	3	2	0	0	1	1	1	0	0	0	0	0	0	0	0
ENOG410YDS2	2	7	16	0	0	1	0	4	3	0	0	0	0	0	0	0	0	0
ENOG410YE6Z	4	3	5	1	0	1	1	38	0	1	0	0	0	0	0	0	0	0
ENOG410YF7P	20	45	14	14	24	18	0	36	35	0	2	0	0	3	0	0	1	0
ENOG410YF8M	0	1	10	1	2	3	0	6	1	0	0	0	0	0	0	0	0	0
ENOG410YGJT	0	7	9	0	0	0	0	0	0	0	0	0	0	0	0	0	0	0
ENOG410YGXU	2	2	5	0	0	1	0	5	0	0	0	0	0	0	0	0	0	0
ENOG410YHHF	3	14	20	0	1	1	0	13	0	1	0	0	0	1	0	0	0	0
ENOG410YHTD	6	5	5	1	1	1	1	22	0	0	0	0	1	1	0	0	0	0
ENOG410YI0I	7	2	4	0	1	0	0	24	0	0	0	2	0	0	0	0	0	0
ENOG410YI5X	0	8	7	1	0	1	0	0	1	0	2	0	0	0	0	0	0	0
ENOG410YIG6	3	2	0	0	1	0	2	5	0	5	3	2	3	7	2	2	1	2
ENOG410YIKI	4	11	22	5	2	4	0	14	3	1	0	6	1	5	2	0	1	0
ENOG410YITC	1	7	7	1	1	1	0	0	0	0	0	0	0	0	0	0	0	0
ENOG410YJ14	1	14	16	2	2	3	0	0	1	0	0	0	1	0	0	0	0	0
ENOG410YJ3P	4	7	12	0	3	0	0	154	0	2	0	0	1	0	1	0	0	0
ENOG410YJG7	1	4	6	2	0	0	0	9	2	2	0	0	1	0	0	0	0	1
ENOG410YJIR	14	7	6	0	0	0	0	49	3	1	0	3	0	0	0	0	0	0
ENOG410YKF6	0	7	7	3	0	5	0	12	2	2	2	3	0	1	0	0	2	0
ENOG410YKQK	8	2	1	1	0	1	0	8	0	1	0	0	0	1	0	0	0	1
ENOG410YKSA	2	7	26	2	0	1	0	0	0	0	0	0	0	0	0	0	0	0
ENOG410YN01	4	2	5	0	0	0	0	27	0	1	0	0	0	0	0	0	0	0
ENOG410YN06	0	6	4	0	0	0	0	9	1	0	0	0	0	1	0	0	1	0
ENOG410YNB6	5	4	2	2	0	1	0	16	0	0	0	1	0	0	1	0	0	0
ENOG410YP05	0	1	13	2	0	4	0	0	1	1	5	0	0	8	0	0	0	0
ENOG410YQ2G	2	5	12	1	2	1	0	22	2	0	1	1	0	1	0	0	0	0
ENOG410YQ9T	0	5	7	0	0	0	0	0	0	0	0	0	0	1	0	0	0	0
ENOG410YRFP	5	2	5	5	0	2	1	14	0	0	0	1	0	0	0	0	3	0
ENOG410YS6Z	3	7	4	2	1	1	0	134	3	1	0	0	0	0	0	1	0	0
ENOG410YSC3	4	8	8	1	0	0	0	0	1	0	0	0	0	0	0	0	0	0
ENOG410YSN6	0	5	5	0	0	0	0	0	1	0	1	0	0	0	0	0	0	0
ENOG410YTYB	0	5	8	1	0	2	0	0	1	0	0	0	0	0	0	0	0	0
ENOG410YV83	2	16	12	1	0	2	0	0	5	0	3	0	0	2	0	0	0	0
ENOG410YVC2	13	18	23	6	3	3	0	215	4	0	0	3	1	0	0	0	0	0
ENOG410YVEM	3	7	7	2	0	1	0	27	1	0	1	0	0	1	1	0	0	1
ENOG410YVNZ	1	6	6	2	0	1	0	14	1	2	0	1	0	0	0	0	2	0
ENOG410YVQ9	3	0	0	3	7	1	0	0	0	0	1	0	0	3	9	0	0	0
ENOG410YVVX	0	7	5	0	0	1	0	0	1	0	0	0	0	0	0	0	0	0
ENOG410YWA5	11	13	6	3	1	2	2	2	0	0	1	4	2	1	7	2	2	0
ENOG410YWJY	1	3	8	1	1	1	0	7	0	0	0	0	0	0	0	0	1	0
ENOG410YWTC	0	0	0	0	0	0	0	174	6	0	0	0	0	0	0	0	0	0
ENOG410YX1H	35	19	11	7	6	3	0	118	2	2	0	2	0	0	0	2	0	0
ENOG410YX6C	13	6	21	5	0	0	0	160	6	0	0	2	0	1	1	0	0	1
ENOG410YYAT	8	12	5	1	0	0	0	26	0	1	0	2	0	0	0	1	0	0
ENOG410YYCN	6	3	5	1	0	1	0	22	0	0	0	0	0	0	1	0	0	0
ENOG410YZD6	0	6	9	1	1	4	0	0	1	0	0	0	0	0	0	0	0	0
ENOG410YZFT	1	6	5	2	0	0	0	0	2	0	0	0	0	0	0	0	0	0
ENOG410YZUC	0	8	8	0	1	2	0	0	1	0	0	0	0	0	0	0	0	0
ENOG410Z0AN	2	2	5	0	0	0	0	14	0	0	0	1	0	1	0	0	0	0
ENOG410Z0G4	5	5	7	1	1	4	0	46	0	1	4	1	0	1	2	0	2	3
ENOG410Z0UX	1	5	15	1	0	2	0	0	0	0	0	0	1	0	0	0	0	0
ENOG410Z0YK	6	11	19	7	3	5	2	6	3	18	8	4	5	10	5	0	1	1
ENOG410Z1NU	2	2	2	0	0	1	0	9	0	0	0	5	0	0	0	0	0	0
ENOG410Z2A2	11	8	20	3	5	0	0	72	2	2	1	3	0	0	0	0	0	0
ENOG410Z3EX	3	14	39	1	1	2	0	0	3	2	1	4	0	4	0	0	0	0
ENOG410Z3FZ	2	9	10	1	1	0	0	1	2	0	0	0	1	2	0	0	0	0
ENOG410Z47K	2	9	31	1	0	5	0	0	0	0	0	0	0	0	0	0	0	0
ENOG410Z4IE	10	5	4	2	2	0	0	14	0	1	0	0	0	0	0	0	0	0
ENOG410Z5DF	2	3	5	0	1	0	0	27	0	1	0	1	0	0	0	0	0	0
ENOG410Z5PX	0	2	3	1	0	3	0	8	2	0	1	1	1	5	3	0	0	0
ENOG410Z6FU	5	1	10	2	1	0	0	6	0	0	0	1	0	0	0	1	0	0
ENOG410Z7RN	0	7	8	2	2	0	0	0	0	1	0	1	0	1	0	0	0	0
ENOG410Z7Z7	3	15	14	1	1	6	0	27	5	0	1	0	0	1	1	0	0	0
ENOG410Z906	5	12	43	1	1	3	0	0	1	0	0	0	0	0	0	0	0	0
ENOG410ZBC9	7	5	10	1	3	0	0	12	0	1	0	1	0	1	0	3	0	0
ENOG410ZBK1	7	21	36	7	4	6	0	46	11	2	3	1	0	5	2	0	4	3
ENOG410ZBX3	2	5	15	1	0	1	0	2	2	0	0	0	0	0	0	0	0	0
ENOG410ZCP0	0	7	7	2	0	0	0	0	3	0	2	0	0	1	0	0	0	0
ENOG410ZD72	5	2	3	0	1	2	0	33	0	0	0	0	0	0	0	1	0	1
ENOG410ZDMK	12	6	15	1	3	3	0	224	3	1	0	1	0	0	0	0	0	0
ENOG410ZERS	0	3	0	0	0	1	0	3	0	0	0	0	0	0	42	1	12	1
ENOG410ZFCU	4	8	16	1	1	5	0	0	0	0	0	0	0	2	0	0	0	0
ENOG410ZFIP	4	22	30	3	2	6	0	0	1	1	0	0	0	0	0	0	0	0
ENOG410ZH1N	0	13	10	0	1	3	0	0	7	0	0	0	0	1	0	0	0	0
ENOG410ZH45	1	8	15	0	0	1	0	0	0	0	0	0	0	0	0	0	0	0
ENOG410ZHRP	1	11	14	2	0	7	0	0	3	0	1	0	0	0	0	0	0	0
ENOG410ZIM0	6	9	34	3	2	2	0	0	3	2	0	3	1	2	1	0	0	0
ENOG410ZITE	5	4	6	0	0	1	1	9	0	0	0	0	0	0	0	0	0	0
ENOG410ZIWC	4	5	29	0	1	2	0	0	2	0	0	0	0	0	0	0	0	0
ENOG410ZKAM	6	4	5	2	0	0	0	3	0	0	0	3	0	0	0	0	0	0
ENOG410ZKCZ	3	6	8	0	0	0	0	0	2	1	0	0	0	0	0	0	0	0
ENOG410ZKGB	0	0	0	0	0	0	0	1	0	0	0	0	0	1	14	0	6	0
ENOG410ZKPI	7	42	10	1	1	2	0	0	0	1	1	2	1	0	0	0	0	0
ENOG410ZM23	1	5	5	0	0	0	0	2	0	1	0	0	0	1	0	0	0	0
ENOG410ZN2X	2	20	37	2	4	3	0	4	6	0	0	0	0	0	0	0	0	0
ENOG410ZNBU	2	4	6	1	1	2	0	5	2	1	0	1	0	0	0	0	0	0
ENOG410ZNC0	4	12	13	3	2	2	1	41	0	0	0	0	0	2	1	0	0	0
ENOG410ZPMA	1	8	7	0	1	1	0	0	0	0	0	0	0	0	0	0	0	0
ENOG410ZRF1	2	3	8	0	0	3	0	12	3	0	0	0	0	1	0	0	0	0
ENOG410ZRNX	9	32	68	6	3	3	0	0	8	0	0	0	0	0	0	0	0	0
ENOG410ZRXT	0	5	12	0	0	1	0	0	3	0	0	0	0	2	0	0	0	0
ENOG410ZS43	0	11	13	0	0	1	0	0	0	0	0	0	0	0	0	0	0	0
ENOG410ZSE4	5	4	10	1	3	0	0	14	1	2	1	1	0	1	1	0	1	0
ENOG410ZSN2	0	12	16	1	1	2	0	0	4	0	0	0	0	0	0	0	0	0
ENOG410ZTSW	1	0	5	0	0	0	0	6	0	0	0	0	0	0	0	0	0	0
ENOG410ZTYM	1	1	6	0	0	0	0	9	0	0	0	0	0	0	0	0	0	0
ENOG410ZUQH	7	3	4	3	1	2	0	39	1	3	4	2	0	0	0	0	2	0
ENOG410ZVDQ	4	8	9	1	2	1	0	4	2	0	0	0	0	0	0	1	0	0
ENOG410ZVEX	0	16	16	0	1	6	0	1	0	0	0	1	0	3	0	0	0	0
ENOG410ZVKW	1	11	19	3	1	1	0	0	3	0	0	0	0	6	0	0	0	0
ENOG410ZVN7	1	7	8	12	8	15	0	22	2	0	2	0	1	19	4	0	0	0
ENOG410ZX6F	1	9	12	0	0	3	0	1	0	0	2	0	0	3	0	0	0	0
ENOG410ZY2P	8	1	1	2	0	3	0	8	1	0	1	0	3	0	0	0	0	0
ENOG410ZYKB	24	45	74	16	5	22	0	62	16	23	16	16	4	39	23	1	13	5
ENOG410ZYZN	9	8	4	0	0	4	2	22	1	1	1	1	1	2	0	0	0	1
ENOG4110057	1	10	5	0	1	2	0	0	3	0	0	0	0	0	0	0	0	0
ENOG41100KJ	0	5	5	0	1	0	0	7	1	0	0	0	0	0	0	0	0	0
ENOG41101KD	48	6	18	0	0	3	0	0	4	1	0	2	0	3	0	0	0	1
ENOG41102ZY	7	0	1	2	1	1	0	73	4	0	1	0	0	0	0	0	0	0
ENOG411040D	6	1	4	0	1	1	0	7	1	0	2	0	0	0	0	0	0	1
ENOG41105IF	1	9	16	0	0	2	0	0	4	0	0	0	0	0	0	0	0	0
ENOG41108X7	2	9	21	0	0	4	0	0	1	0	2	0	0	0	0	0	0	0
ENOG41108YP	1	9	11	0	0	1	0	0	0	0	0	0	0	0	0	0	0	0
ENOG411092H	3	6	9	2	0	2	0	0	2	0	0	0	1	0	0	0	0	0
ENOG411093J	0	6	5	0	1	0	0	0	1	0	0	0	0	0	0	0	0	0
ENOG411093M	8	74	136	11	4	12	0	0	5	0	0	0	1	0	0	0	0	0
ENOG411094Q	1	9	29	0	3	0	0	0	3	0	0	0	0	0	0	0	0	0
ENOG4110988	2	14	17	0	1	0	0	0	4	0	0	0	0	0	0	0	0	0
ENOG41109BD	0	5	5	2	1	0	0	0	6	0	0	0	0	1	0	0	0	0
ENOG41109BW	3	40	82	4	0	10	0	0	8	0	0	0	0	0	0	0	0	0
ENOG41109DT	2	7	5	1	0	0	0	0	1	0	2	0	0	0	0	0	0	0
ENOG41109E8	1	6	6	0	1	0	0	0	1	0	0	0	0	0	0	0	0	0
ENOG41109ES	1	7	10	0	1	1	0	0	2	0	0	0	0	0	0	0	0	0
ENOG41109FN	0	5	21	3	1	0	0	0	9	1	0	0	0	0	0	0	0	0
ENOG41109FT	0	9	12	2	0	1	0	0	1	0	0	0	0	0	0	0	0	0
ENOG41109G6	1	7	13	1	1	2	0	0	0	1	0	0	0	1	0	0	0	0
ENOG41109GB	2	5	10	0	0	1	0	0	1	0	0	0	0	0	0	0	0	0
ENOG41109HE	0	10	18	2	2	2	0	0	1	1	0	0	0	6	0	0	0	0
ENOG41109HZ	3	26	38	1	1	3	0	0	10	0	0	0	0	1	0	0	0	0
ENOG41109KZ	2	14	15	1	0	0	0	0	0	0	1	0	0	0	0	0	0	0
ENOG41109M5	0	11	19	1	0	1	0	0	5	0	0	0	0	1	0	0	0	0
ENOG41109MM	1	5	6	0	1	1	0	0	0	0	2	0	0	0	0	0	0	0
ENOG41109MN	3	23	37	2	3	7	0	0	11	0	1	0	0	4	0	0	0	0
ENOG41109N4	0	7	8	0	0	2	0	0	0	0	0	0	0	0	0	0	0	0
ENOG41109Q3	0	5	5	0	1	0	0	0	0	0	0	0	0	0	0	0	0	0
ENOG41109QN	0	8	9	0	0	0	0	0	1	0	0	0	0	0	0	0	0	0
ENOG41109QX	0	12	32	2	1	5	0	0	10	0	0	0	0	0	0	0	0	0
ENOG41109SD	0	9	14	1	0	1	0	0	3	0	0	0	0	0	0	0	0	0
ENOG41109SM	0	5	6	0	0	1	0	0	1	0	0	0	0	0	0	0	0	0
ENOG41109SR	0	8	11	0	0	0	0	0	1	0	0	0	0	0	0	0	0	0
ENOG41109US	0	17	28	4	3	3	0	0	1	0	0	0	0	0	0	0	0	0
ENOG41109UZ	2	19	44	2	3	3	0	0	4	0	0	0	0	2	0	0	0	0
ENOG41109W3	0	9	6	0	0	0	0	0	0	0	0	0	0	0	0	0	0	0
ENOG41109W6	1	10	14	1	1	3	0	0	4	0	0	0	0	0	0	0	0	0
ENOG41109X8	5	17	46	1	3	8	0	0	2	0	0	0	0	0	0	0	0	0
ENOG41109XP	1	7	11	1	0	0	0	0	2	0	0	0	0	0	0	0	0	0
ENOG41109XR	0	7	21	2	0	0	0	0	2	0	0	0	0	0	0	0	0	0
ENOG41109Y1	9	7	47	2	1	0	0	0	1	0	0	1	1	0	0	0	0	0
ENOG41109ZK	2	5	15	1	0	1	0	0	0	0	0	0	0	0	0	0	0	0
ENOG4110A12	0	5	5	0	0	0	0	0	4	0	0	0	0	0	0	0	0	0
ENOG4110A22	1	5	7	0	1	1	0	0	1	0	0	0	0	0	0	0	0	0
ENOG4110A2C	2	11	22	0	1	3	0	0	4	0	0	0	0	0	0	0	0	0
ENOG4110A4G	0	5	5	0	1	2	0	0	1	0	0	0	0	0	0	0	0	0
ENOG4110A4S	3	7	12	0	1	1	0	0	0	0	0	0	0	0	0	0	0	0
ENOG4110A5P	0	8	10	1	0	1	0	0	0	0	0	0	0	0	0	0	0	0
ENOG4110A5W	5	12	28	4	0	4	0	0	0	0	0	0	0	0	0	0	0	0
ENOG4110A8D	1	8	18	1	0	4	0	0	2	0	0	0	0	0	0	0	0	0
ENOG4110A8S	2	5	9	2	0	0	0	0	2	0	0	0	0	0	0	0	0	0
ENOG4110A8V	0	6	9	0	1	0	0	0	0	0	0	0	0	0	0	0	0	0
ENOG4110A9B	3	12	14	1	1	2	0	0	1	0	0	0	0	1	0	0	0	0
ENOG4110A9Q	0	5	18	0	0	2	0	0	0	0	0	0	0	0	0	0	0	0
ENOG4110AA7	1	9	20	0	0	1	0	0	0	0	0	0	0	0	0	0	0	0
ENOG4110AAW	3	13	10	0	1	3	0	0	5	0	0	0	0	0	0	0	0	0
ENOG4110AAX	1	18	21	0	3	3	0	0	4	1	0	0	0	0	0	0	0	0
ENOG4110AB1	1	8	6	0	2	2	0	0	1	0	0	0	0	0	0	0	0	0
ENOG4110ABB	3	8	22	2	0	0	0	0	1	0	0	0	0	0	0	0	0	0
ENOG4110ABQ	2	12	20	1	1	4	0	0	6	0	0	0	0	1	0	0	0	0
ENOG4110ABU	1	6	15	0	0	1	0	0	0	0	0	0	0	0	0	0	0	0
ENOG4110AC9	5	13	16	0	0	2	0	0	0	0	0	0	0	0	0	0	0	0
ENOG4110ACA	1	8	21	1	0	2	0	0	6	1	0	0	0	0	0	0	0	0
ENOG4110ACR	2	5	11	1	0	3	0	0	2	0	0	0	0	0	0	0	0	0
ENOG4110AD9	1	5	14	0	2	3	0	0	4	0	0	0	0	0	0	0	0	0
ENOG4110ADT	0	10	9	1	0	1	0	0	2	0	0	0	0	0	0	0	0	0
ENOG4110ADY	1	5	10	4	0	0	0	0	0	0	0	0	1	0	0	0	0	0
ENOG4110AE2	0	10	11	1	2	0	0	0	2	0	0	0	0	0	0	0	0	0
ENOG4110AFI	0	8	13	2	0	1	0	0	0	1	0	0	0	0	0	0	0	0
ENOG4110AFN	0	6	8	0	0	1	0	0	0	0	0	0	0	0	0	0	0	0
ENOG4110HCP	8	3	7	2	0	2	0	0	0	0	0	0	0	0	0	0	0	0
ENOG4110PAX	7	6	13	1	1	1	0	26	1	2	3	0	1	2	3	0	0	0
ENOG4110TZP	2	2	7	0	0	0	0	10	1	0	0	0	0	0	0	0	0	0
ENOG4110WE2	12	6	7	6	6	0	0	30	1	2	2	4	0	0	0	0	0	0
ENOG4110WGA	18	0	5	3	15	0	0	0	0	0	0	2	0	0	0	0	0	0
ENOG4110WKI	7	6	5	1	2	0	0	18	0	1	0	1	0	0	0	0	0	0
ENOG4110WWP	7	7	11	2	0	1	0	19	0	0	0	0	0	0	0	0	0	0
ENOG4110X3V	18	14	15	2	3	4	0	147	3	0	2	5	0	0	1	0	0	0
ENOG4110X8E	5	7	1	0	1	0	0	0	0	0	0	0	0	0	0	1	0	0
ENOG4110X9M	0	7	3	5	0	2	0	0	0	0	0	0	0	0	0	0	1	0
ENOG4110X9U	0	3	7	0	1	1	0	10	0	0	0	0	0	0	0	0	0	0
ENOG4110XPP	1	0	0	0	0	0	0	861	8	0	0	0	0	0	0	0	0	0
ENOG41112PD	9	7	20	2	3	6	0	0	1	1	1	4	0	6	0	1	1	2
ENOG41113JB	3	2	5	0	5	0	0	0	0	0	0	7	0	0	0	0	0	0
ENOG411144D	0	8	19	3	3	2	0	0	1	0	0	0	0	0	0	0	0	0
ENOG411145S	2	6	3	2	2	3	0	17	1	0	0	0	0	2	0	0	0	0
ENOG41115I7	5	1	6	1	0	0	0	1	0	0	0	0	0	0	0	0	0	0
ENOG411190V	6	3	0	0	1	0	0	49	1	1	1	1	1	2	0	0	0	0
ENOG4111BTU	2	0	0	0	1	0	0	254	6	0	0	0	0	0	0	0	0	0
ENOG4111CKU	0	6	6	1	0	1	0	0	0	0	0	0	0	0	0	0	0	0
ENOG4111FP9	1	4	8	0	0	0	0	6	0	0	0	0	0	0	0	0	0	0
ENOG4111FTG	0	3	7	0	2	0	0	5	1	1	1	4	0	0	1	0	0	0
ENOG4111FVP	17	21	42	6	4	15	1	24	6	8	7	8	5	7	11	0	1	1
ENOG4111G2F	1	2	5	0	2	3	0	8	0	0	0	0	0	1	0	0	0	0
ENOG4111G58	0	4	0	0	0	2	0	0	0	5	11	1	0	2	3	0	1	0
ENOG4111GP2	3	2	6	1	1	0	0	10	0	0	0	1	1	0	0	0	0	0
ENOG4111GRE	6	2	8	0	1	0	0	15	0	1	0	2	0	0	1	0	0	0
ENOG4111GTV	1	1	5	0	0	1	0	22	3	0	0	0	0	0	0	0	0	0
ENOG4111H26	12	10	27	2	2	4	0	141	12	1	3	3	1	9	4	1	4	0
ENOG4111HRC	0	5	6	0	0	1	0	0	0	0	3	0	0	0	0	0	0	0
ENOG4111HSF	3	1	8	1	1	1	0	9	1	0	0	0	0	0	0	0	0	0
ENOG4111HV1	0	8	26	4	1	1	0	0	3	0	0	0	0	2	0	0	0	0
ENOG4111I7J	1	7	8	0	0	2	0	0	1	0	1	1	0	0	0	0	0	0
ENOG4111IA8	3	7	2	5	7	21	0	4	3	12	8	13	7	16	20	2	1	1
ENOG4111ICI	4	2	5	0	1	0	0	9	1	1	2	2	0	0	1	0	0	2
ENOG4111IHJ	12	5	10	2	0	2	0	36	0	1	2	2	0	2	3	0	3	0
ENOG4111IHX	0	2	1	0	0	1	5	9	0	2	0	1	0	0	1	1	0	1
ENOG4111IJ3	1	5	10	0	0	0	0	0	0	0	0	0	0	0	0	0	0	0
ENOG4111IQ4	0	2	5	0	0	2	0	7	0	0	0	0	0	0	0	0	0	0
ENOG4111J3J	10	2	10	1	4	0	0	7	0	0	0	0	0	0	1	0	0	0
ENOG4111J90	0	5	4	1	0	1	0	7	2	1	0	0	0	0	0	0	0	0
ENOG4111JAT	5	19	17	5	3	7	1	15	8	8	2	5	1	12	11	1	2	0
ENOG4111JAW	3	3	6	0	0	0	0	14	0	0	0	0	0	0	0	1	0	0
ENOG4111JAY	13	8	10	3	1	6	3	13	0	1	1	3	0	0	0	0	1	3
ENOG4111JBG	0	12	26	2	2	15	0	16	4	6	4	5	5	14	4	1	2	0
ENOG4111JFW	1	5	8	0	0	0	0	0	2	0	0	0	0	0	0	0	0	0
ENOG4111JHC	0	4	3	2	7	0	0	0	0	2	8	3	6	2	3	0	0	0
ENOG4111JI6	5	8	4	3	1	0	0	57	0	1	0	0	0	0	0	0	0	0
ENOG4111JVA	34	15	8	3	4	3	1	89	0	2	2	4	0	0	0	1	1	0
ENOG4111JYH	0	5	5	0	0	1	0	1	0	0	1	0	0	0	1	0	0	0
ENOG4111KIB	3	2	7	3	0	0	0	5	1	0	0	0	0	0	0	0	0	0
ENOG4111KNT	4	4	5	1	0	0	0	10	1	0	0	0	0	0	0	0	0	0
ENOG4111KYI	17	13	17	1	4	2	1	11	1	2	0	0	0	2	0	1	1	2
ENOG4111M4R	1	14	11	1	1	2	0	0	4	0	0	0	0	0	0	0	0	0
ENOG4111M7X	4	0	6	0	0	0	0	10	0	0	0	5	1	0	1	0	0	0
ENOG4111MEJ	0	5	5	1	0	0	0	2	0	0	0	0	0	0	0	0	0	0
ENOG4111MUX	1	4	11	3	2	0	0	10	0	0	0	4	1	0	0	1	0	0
ENOG4111MV9	6	2	5	0	2	3	0	43	0	2	0	3	0	0	0	0	0	0
ENOG4111MWT	1	6	7	0	0	2	0	0	2	0	0	0	0	0	0	0	0	0
ENOG4111NK2	0	0	6	0	1	2	0	2	0	5	4	4	1	1	0	0	0	0
ENOG4111NV5	16	35	31	5	6	41	2	38	1	54	42	45	17	38	48	0	9	3
ENOG4111NW7	11	13	37	3	1	5	0	1	3	0	0	0	1	2	0	0	0	0
ENOG4111NWY	1	6	2	0	0	0	0	25	0	0	0	1	1	2	0	0	0	0
ENOG4111P0U	1	8	6	1	2	0	0	0	0	0	0	0	0	0	0	0	0	0
ENOG4111PGY	1	7	9	0	0	4	0	0	3	0	0	0	0	1	0	0	0	0
ENOG4111Q5U	2	9	22	3	1	1	0	0	4	0	0	0	0	0	0	0	0	0
ENOG4111QEJ	6	13	6	1	1	2	0	264	7	1	1	1	0	0	0	0	0	1
ENOG4111QUX	0	4	5	0	1	0	0	16	2	0	0	1	0	3	0	0	0	0
ENOG4111S0Y	4	7	3	1	1	2	1	22	0	0	0	0	0	0	0	0	0	0
ENOG4111SSC	2	1	5	1	0	2	0	14	1	0	0	0	0	1	0	0	0	0
ENOG4111T0S	3	11	4	0	1	0	0	8	0	0	0	1	0	0	0	2	0	0
ENOG4111T32	6	18	56	6	5	8	0	13	6	3	2	7	1	17	1	0	1	0
ENOG4111TN9	6	2	5	1	1	0	0	11	0	1	1	0	0	0	1	0	0	0
ENOG4111TR4	3	5	12	1	0	2	0	13	2	0	0	0	1	1	1	0	1	1
ENOG4111TTK	9	13	5	4	3	2	3	51	1	2	0	3	1	1	0	0	3	1
ENOG4111UER	0	4	6	2	0	1	0	9	1	3	0	1	2	0	1	0	0	0
ENOG4111UJC	0	5	6	0	0	2	0	0	1	0	0	0	0	1	0	0	0	0
ENOG4111URX	0	1	5	1	1	0	0	7	1	0	0	0	0	2	0	0	0	0
ENOG4111UVJ	27	21	42	8	3	9	0	45	7	9	8	3	4	23	16	0	4	3
ENOG4111UVS	0	9	7	0	0	2	0	2	1	0	0	0	0	0	0	0	0	0
ENOG4111UWC	2	10	15	1	1	10	0	0	4	0	2	0	0	1	0	0	0	0
ENOG4111VKY	0	8	28	1	1	1	0	4	1	0	2	0	0	0	0	0	0	0
ENOG4111W00	4	4	8	0	0	1	0	12	3	0	0	0	0	0	0	0	0	0
ENOG4111X3D	2	2	5	2	1	2	0	18	1	0	0	0	0	0	0	0	0	0
ENOG4111X5E	1	5	16	0	2	1	0	0	1	0	0	0	1	1	0	0	0	0
ENOG4111X5Y	6	6	3	3	0	1	0	35	0	1	0	0	0	1	0	0	0	1
ENOG4111XEM	1	4	13	3	2	1	0	18	0	0	0	0	0	1	0	0	1	0
ENOG4111XQR	4	6	7	2	1	1	1	28	2	0	0	0	0	0	0	0	1	1
ENOG4111XVR	1	4	9	0	0	2	0	5	1	1	0	0	0	0	0	0	0	1
ENOG4111XWY	22	20	12	1	5	2	0	3	0	2	0	5	1	1	0	1	0	0
ENOG4111YZY	5	1	5	0	1	1	0	10	0	0	0	0	0	0	1	0	0	0
ENOG4111Z48	0	7	11	2	0	0	0	0	2	0	0	0	0	0	0	0	0	0
ENOG4111Z6B	9	1	2	0	0	5	0	0	0	0	0	0	0	1	0	1	0	0
ENOG4111ZPV	1	20	17	3	0	1	1	8	0	2	0	4	1	4	3	1	4	0
ENOG41120HA	2	2	5	1	1	0	0	18	0	0	0	1	1	0	0	0	0	0
ENOG41121N2	9	29	48	3	1	5	0	10	4	1	1	4	0	0	0	0	0	0
ENOG41121RT	1	5	13	0	2	1	1	10	2	1	2	4	1	2	2	0	0	2
ENOG41121SE	3	5	2	1	1	1	0	72	5	1	0	0	0	2	0	0	1	0
ENOG41121WM	1	5	16	1	1	4	0	23	2	3	3	5	3	2	2	0	2	2
ENOG4112229	9	33	49	4	2	12	0	20	2	13	4	5	6	15	7	0	1	5
ENOG4112266	14	30	39	9	2	25	0	40	9	23	18	16	14	37	33	0	6	1
ENOG41122P5	3	13	22	1	1	1	0	10	7	1	2	2	0	3	2	0	1	0
ENOG41122Q2	3	6	6	1	1	0	0	130	2	0	0	1	0	0	0	0	0	0
ENOG411230N	2	7	9	0	0	1	0	6	0	0	0	1	0	0	0	0	1	0
ENOG41123BH	1	1	6	0	1	1	0	19	0	0	0	0	0	1	0	0	0	0
ENOG41123CD	6	10	10	2	0	2	0	40	3	4	4	1	1	2	1	0	0	2
ENOG41123KC	19	31	80	9	7	17	0	27	14	26	15	8	9	32	21	1	5	0
ENOG4112428	23	34	33	9	8	22	1	51	6	14	14	13	11	28	18	1	7	0
ENOG411255K	6	25	62	4	4	5	0	0	4	0	0	0	0	2	0	0	0	0
ENOG411255Z	2	5	13	3	0	0	0	0	0	0	0	0	0	1	0	0	0	0
ENOG41125CF	2	1	5	0	0	0	0	18	0	0	0	1	2	0	0	0	1	0
ENOG41125XE	0	5	7	0	1	0	0	0	2	0	0	1	0	0	0	0	0	1
ENOG41125ZR	6	0	0	0	0	0	0	312	9	0	0	0	0	0	0	0	0	0
ENOG411261V	5	5	2	0	2	0	0	4	0	0	0	0	0	0	1	0	0	0
ENOG41126JC	9	6	13	3	0	3	0	24	5	0	0	0	0	0	0	1	0	0
ENOG411270Y	0	10	12	0	1	1	0	0	2	0	0	0	0	2	0	0	0	0
ENOG41128HR	0	5	5	0	0	4	0	0	10	0	0	0	0	0	0	0	0	0
ENOG41128IA	3	10	24	0	2	2	0	0	2	0	0	0	0	0	0	0	0	0
ENOG4112A8W	9	6	2	1	1	1	0	2	0	0	0	0	0	0	0	0	0	0
ENOG4112A9T	8	6	4	0	0	1	0	33	1	1	0	0	0	0	0	1	0	0
ENOG4112AV8	2	3	5	0	0	0	1	5	1	0	0	0	0	0	0	0	0	0
ENOG4112CVC	33	18	7	2	9	3	0	3	0	3	2	0	0	1	1	0	0	0

## Sheet: DESeq2_COGs_ALvsRO
id	baseMean	log2FoldChange	lfcSE	stat	pvalue	padj	Database	Protein count	Species count	COG functional category	Consensus functional description	Significant
COG0002	1.26813	0.686558	0.702253	0.977651	0.328247	0.977446	NOG	1641	1500	E	N-acetylglutamate semialdehyde dehydrogenase	No
COG0003	1.6146	-0.469625	0.605916	-0.775066	0.4383	0.977446	NOG	1137	650	P	ATPase required for the post-translational delivery of tail-anchored (TA) proteins to the endoplasmic reticulum. Recognizes and selectively binds the transmembrane domain of TA proteins in the cytosol. This complex then targets to the endoplasmic reticulum by membrane-bound receptors, where the tail- anchored protein is released for insertion. This process is regulated by ATP binding and hydrolys…	No
COG0004	2.46901	-1.52401	0.59375	-2.56676	0.0102654	0.977446	NOG	987	387	P	ammonium Transporter	No
COG0005	0.969432	0.856121	0.750475	1.14077	0.253965	0.977446	NOG	1852	1330	F	The purine nucleoside phosphorylases catalyze the phosphorolytic breakdown of the N-glycosidic bond in the beta- (deoxy)ribonucleoside molecules, with the formation of the corresponding free purine bases and pentose-1-phosphate (By similarity)	No
COG0006	2.03859	0.356049	0.627434	0.567469	0.570396	0.977446	NOG	4754	1995	E	peptidase M24	No
COG0007	2.2601	-0.5904	0.686623	-0.859861	0.389866	0.977446	NOG	2013	1314	H	Multifunctional enzyme that catalyzes the SAM-dependent methylation of uroporphyrinogen III at position C-2 and C-7 to form precorrin-2 and then position C-12 or C-18 to form trimethylpyrrocorphin 2. It also catalyzes the conversion of precorrin-2 into siroheme. This reaction consists of the NAD- dependent oxidation of precorrin-2 into sirohydrochlorin and its subsequent ferrochelation into siroh…	No
COG0008	4.00284	0.697424	0.570016	1.22352	0.221135	0.977446	NOG	4412	2024	J	Catalyzes the attachment of glutamate to tRNA(Glu) in a two-step reaction glutamate is first activated by ATP to form Glu-AMP and then transferred to the acceptor end of tRNA(Glu) (By similarity)	No
COG0010	4.24581	-1.33339	0.558267	-2.38845	0.0169195	0.977446	NOG	2438	1271	E	hydrolase activity, acting on carbon-nitrogen (but not peptide) bonds, in linear amidines	No
COG0012	3.14414	0.161127	0.577704	0.27891	0.780314	0.98576	NOG	2316	2008	J	gtp-binding protein	No
COG0013	2.73774	0.60379	0.603673	1.00019	0.317217	0.977446	NOG	2315	2012	J	Catalyzes the attachment of alanine to tRNA(Ala) in a two-step reaction alanine is first activated by ATP to form Ala- AMP and then transferred to the acceptor end of tRNA(Ala). Also edits incorrectly charged Ser-tRNA(Ala) and Gly-tRNA(Ala) via its editing domain (By similarity)	No
COG0014	2.37928	0.676431	0.610832	1.10739	0.268124	0.977446	NOG	1704	1556	E	Catalyzes the NADPH dependent reduction of L-gamma- glutamyl 5-phosphate into L-glutamate 5-semialdehyde and phosphate. The product spontaneously undergoes cyclization to form 1-pyrroline-5-carboxylate (By similarity)	No
COG0015	2.73552	-0.201543	0.619221	-0.325478	0.744819	0.983188	NOG	2362	1914	F	adenylosuccinate lyase	No
COG0016	2.05304	0.173151	0.54341	0.318637	0.750001	0.983188	NOG	2350	2020	J	phenylalanyL-tRNA synthetase, alpha subunit	No
COG0017	3.94648	0.832237	0.608754	1.36711	0.171589	0.977446	NOG	2161	1291	J	asparaginyl-tRNA synthetase	No
COG0018	1.95186	-0.576784	0.693293	-0.831948	0.405438	0.977446	NOG	2389	2014	J	arginyL-tRNA synthetase	No
COG0019	4.05634	-0.367584	0.492817	-0.745884	0.455737	0.977446	NOG	3398	1817	E	Specifically catalyzes the decarboxylation of meso- diaminopimelate (meso-DAP) to L-lysine (By similarity)	No
COG0020	2.42378	1.37284	0.579142	2.37047	0.0177654	0.977446	NOG	2614	1963	I	Catalyzes the condensation of isopentenyl diphosphate (IPP) with allylic pyrophosphates generating different type of terpenoids (By similarity)	No
COG0021	7.49023	0.0217494	0.374856	0.0580207	0.953732	0.99866	NOG	2241	1599	G	Transketolase	No
COG0022	3.70377	0.550383	0.534524	1.02967	0.303165	0.977446	NOG	2422	1238	C	Dehydrogenase, E1 component	No
COG0023	5.03548	-0.387007	0.448677	-0.862552	0.388384	0.977446	NOG	1189	749	J	translation initiation factor	No
COG0024	4.26114	0.234361	0.487804	0.480441	0.630914	0.977446	NOG	3645	2016	J	Removes the N-terminal methionine from nascent proteins (By similarity)	No
COG0025	2.01917	0.71457	0.589429	1.21231	0.225394	0.977446	NOG	3298	1237	P	Sodium hydrogen exchanger	No
COG0028	4.47351	-0.76372	0.455842	-1.67541	0.0938547	0.977446	NOG	5016	1744	E	acetolactate synthase	No
COG0029	1.72394	0.779803	0.734867	1.06115	0.288623	0.977446	NOG	1158	1114	H	L-aspartate oxidase	No
COG0031	3.03127	0.434113	0.509003	0.85287	0.393732	0.977446	NOG	4199	1801	E	cysteine biosynthetic process from serine	No
COG0033	6.06017	0.248071	0.505444	0.490798	0.62357	0.977446	NOG	935	781	G	phosphoglucomutase	No
COG0035	1.54455	0.92391	0.618898	1.49283	0.135481	0.977446	NOG	2331	1626	F	Catalyzes the conversion of uracil and 5-phospho-alpha- D-ribose 1-diphosphate (PRPP) to UMP and diphosphate (By similarity)	No
COG0037	1.95868	-0.491599	0.633609	-0.775871	0.437825	0.977446	NOG	3440	1986	D	Ligates lysine onto the cytidine present at position 34 of the AUA codon-specific tRNA(Ile) that contains the anticodon CAU, in an ATP-dependent manner. Cytidine is converted to lysidine, thus changing the amino acid specificity of the tRNA from methionine to isoleucine (By similarity)	No
COG0038	2.90935	0.618418	0.614685	1.00607	0.314381	0.977446	NOG	3149	1407	P	chloride channel	No
COG0039	9.63093	-0.286687	0.417302	-0.687001	0.492082	0.977446	NOG	3492	1734	C	Catalyzes the reversible oxidation of malate to oxaloacetate (By similarity)	No
COG0042	3.1785	0.246192	0.585435	0.420528	0.6741	0.982336	NOG	3760	1884	J	Catalyzes the synthesis of dihydrouridine a modified base found in the D-loop of most tRNAs (By similarity)	No
COG0044	3.35973	0.00558111	0.6	0.00930185	0.992578	0.998918	NOG	3076	1699	F	Dihydroorotase	No
COG0045	7.68889	0.0149214	0.394656	0.0378086	0.96984	0.99866	NOG	2047	1420	C	Succinyl-CoA synthetase subunit beta	No
COG0046	3.49012	-0.470097	0.549974	-0.854762	0.392683	0.977446	NOG	1937	1829	F	phosphoribosylformylglycinamidine synthase	No
COG0047	3.12749	-0.388884	0.609325	-0.638221	0.52333	0.977446	NOG	1887	1827	F	phosphoribosylformylglycinamidine synthase	No
COG0048	35.1967	0.056453	0.386641	0.146009	0.883914	0.98576	NOG	2427	2013	J	Interacts with and stabilizes bases of the 16S rRNA that are involved in tRNA selection in the A site and with the mRNA backbone. Located at the interface of the 30S and 50S subunits, it traverses the body of the 30S subunit contacting proteins on the other side and probably holding the rRNA structure together. The combined cluster of proteins S8, S12 and S17 appears to hold together the shoulder…	No
COG0049	28.847	-0.0815398	0.355005	-0.229686	0.818336	0.98576	NOG	2420	2002	J	One of the primary rRNA binding proteins, it binds directly to 16S rRNA where it nucleates assembly of the head domain of the 30S subunit. Is located at the subunit interface close to the decoding center, probably blocks exit of the E-site tRNA (By similarity)	No
COG0050	5.05687	-0.0850914	0.459406	-0.185221	0.853056	0.98576	NOG	2820	1883	J	This protein promotes the GTP-dependent binding of aminoacyl-tRNA to the A-site of ribosomes during protein biosynthesis (By similarity)	No
COG0051	14.9181	-0.0950094	0.405232	-0.234457	0.81463	0.98576	NOG	2346	2000	J	tRNA binding	No
COG0052	18.0182	-0.137086	0.387466	-0.353801	0.723488	0.983188	NOG	2559	2022	J	30S ribosomal protein S2	No
COG0053	1.72983	-0.111119	0.658759	-0.168679	0.866049	0.98576	NOG	2640	1635	P	cation diffusion facilitator family transporter	No
COG0054	1.44738	0.791979	0.625856	1.26543	0.205717	0.977446	NOG	1755	1610	H	Catalyzes the formation of 6,7-dimethyl-8- ribityllumazine by condensation of 5-amino-6-(D- ribitylamino)uracil with 3,4-dihydroxy-2-butanone 4-phosphate. This is the penultimate step in the biosynthesis of riboflavin (By similarity)	No
COG0055	32.6147	-0.310694	0.349967	-0.887781	0.374659	0.977446	NOG	2154	1793	C	Produces ATP from ADP in the presence of a proton gradient across the membrane. The catalytic sites are hosted primarily by the beta subunits (By similarity)	No
COG0056	18.8382	0.0471688	0.407192	0.115839	0.90778	0.988711	NOG	2071	1790	C	Produces ATP from ADP in the presence of a proton gradient across the membrane. The alpha chain is a regulatory subunit (By similarity)	No
COG0057	19.6481	0.0202561	0.389705	0.051978	0.958546	0.99866	NOG	3934	2007	G	glyceraldehyde3phosphate dehydrogenase	No
COG0058	8.02618	0.168688	0.591957	0.284967	0.77567	0.98576	NOG	1981	1348	G	Phosphorylase is an important allosteric enzyme in carbohydrate metabolism. Enzymes from different sources differ in their regulatory mechanisms and in their natural substrates. However, all known phosphorylases share catalytic and structural properties (By similarity)	No
COG0059	5.83337	0.155384	0.416346	0.373209	0.708993	0.983188	NOG	1659	1564	E	Alpha-keto-beta-hydroxylacyl reductoisomerase	No
COG0060	4.02323	-0.387296	0.540532	-0.716508	0.473677	0.977446	NOG	2427	2013	J	amino acids such as valine, to avoid such errors it has two additional distinct tRNA(Ile)-dependent editing activities. One activity is designated as 'pretransfer' editing and involves the hydrolysis of activated Val-AMP. The other activity is designated 'posttransfer' editing and involves deacylation of mischarged Val-tRNA(Ile) (By similarity)	No
COG0061	1.18081	0.207222	0.720019	0.2878	0.7735	0.98576	NOG	2385	1940	G	Catalyzes the phosphorylation of NAD to NADP. Utilizes ATP and other nucleoside triphosphates as well as inorganic polyphosphate as a source of phosphorus (By similarity)	No
COG0065	2.64546	0.235754	0.532992	0.442322	0.658256	0.977446	NOG	1931	1539	E	Catalyzes the isomerization between 2-isopropylmalate and 3-isopropylmalate, via the formation of 2-isopropylmaleate (By similarity)	No
COG0066	1.6688	0.700714	0.626559	1.11835	0.263416	0.977446	NOG	1902	1537	E	Catalyzes the isomerization between 2-isopropylmalate and 3-isopropylmalate, via the formation of 2-isopropylmaleate (By similarity)	No
COG0067	5.74253	-0.405273	0.436692	-0.928053	0.35338	0.977446	NOG	1664	1361	E	glutamate synthase	No
COG0069	6.91659	-0.557231	0.420243	-1.32598	0.184848	0.977446	NOG	2295	1414	E	glutamate synthase	No
COG0070	5.9801	-0.3095	0.429631	-0.720385	0.471288	0.977446	NOG	1630	1353	E	glutamate synthase	No
COG0072	2.10678	-0.0836212	0.56848	-0.147096	0.883056	0.98576	NOG	2393	2015	J	phenylalanyl-tRNA synthetase (beta subunit)	No
COG0073	4.67304	-0.0258434	0.593622	-0.0435351	0.965275	0.99866	NOG	3982	2007	J	Is required not only for elongation of protein synthesis but also for the initiation of all mRNA translation through initiator tRNA(fMet) aminoacylation (By similarity)	No
COG0074	10.4659	0.212473	0.370778	0.573046	0.566613	0.977446	NOG	2015	1436	C	Succinyl-CoA ligase ADP-forming subunit alpha	No
COG0075	1.21525	1.07123	0.737	1.45351	0.146083	0.977446	NOG	1716	1169	E	aminotransferase	No
COG0076	3.06647	1.12806	0.60414	1.86722	0.0618707	0.977446	NOG	3098	976	E	decarboxylase	No
COG0079	2.15842	0.0852976	0.58453	0.145925	0.883981	0.98576	NOG	3303	1645	E	Imidazole acetol-phosphate transaminase	No
COG0080	16.2489	-0.00695794	0.276797	-0.0251374	0.979945	0.99866	NOG	2550	2012	J	This protein binds directly to 23S ribosomal RNA (By similarity)	No
COG0081	22.4912	-0.263899	0.311671	-0.846725	0.397148	0.977446	NOG	2435	2007	J	Binds directly to 23S rRNA. The L1 stalk is quite mobile in the ribosome, and is involved in E site tRNA release (By similarity)	No
COG0084	1.624	1.128	0.716883	1.57348	0.115607	0.977446	NOG	3207	1980	L	tatd family	No
COG0085	9.12366	-0.380353	0.430579	-0.883351	0.377046	0.977446	NOG	2889	2013	K	DNA-dependent RNA polymerase catalyzes the transcription of DNA into RNA using the four ribonucleoside triphosphates as substrates (By similarity)	No
COG0086	9.72072	-0.060889	0.417629	-0.145797	0.884082	0.98576	NOG	3112	2013	K	DNA-dependent RNA polymerase catalyzes the transcription of DNA into RNA using the four ribonucleoside triphosphates as substrates (By similarity)	No
COG0087	33.8353	0.14858	0.279144	0.53227	0.594539	0.977446	NOG	2511	2016	J	One of the primary rRNA binding proteins, it binds directly near the 3'-end of the 23S rRNA, where it nucleates assembly of the 50S subunit (By similarity)	No
COG0088	15.1733	0.00975207	0.37949	0.0256979	0.979498	0.99866	NOG	2406	2018	J	One of the primary rRNA binding proteins, this protein initially binds near the 5'-end of the 23S rRNA. It is important during the early stages of 50S assembly. It makes multiple contacts with different domains of the 23S rRNA in the assembled 50S subunit and ribosome (By similarity)	No
COG0089	10.635	0.164903	0.327985	0.502774	0.615123	0.977446	NOG	2411	1983	J	One of the early assembly proteins it binds 23S rRNA. One of the proteins that surrounds the polypeptide exit tunnel on the outside of the ribosome. Forms the main docking site for trigger factor binding to the ribosome (By similarity)	No
COG0090	30.476	-0.392109	0.315521	-1.24273	0.213966	0.977446	NOG	2464	2023	J	One of the primary rRNA binding proteins. Required for association of the 30S and 50S subunits to form the 70S ribosome, for tRNA binding and peptide bond formation. It has been suggested to have peptidyltransferase activity	No
COG0091	13.7923	-0.0819313	0.511787	-0.160089	0.872811	0.98576	NOG	2491	2017	J	The globular domain of the protein is located near the polypeptide exit tunnel on the outside of the subunit, while an extended beta-hairpin is found that lines the wall of the exit tunnel in the center of the 70S ribosome (By similarity)	No
COG0092	21.0874	0.0568704	0.37859	0.150217	0.880594	0.98576	NOG	2212	2021	J	Binds the lower part of the 30S subunit head. Binds mRNA in the 70S ribosome, positioning it for translation (By similarity)	No
COG0093	17.9802	-0.0727444	0.387568	-0.187695	0.851116	0.98576	NOG	2347	2016	J	Binds to 23S rRNA. Forms part of two intersubunit bridges in the 70S ribosome (By similarity)	No
COG0094	21.2146	0.274891	0.292814	0.938789	0.347839	0.977446	NOG	2293	2012	J	This is 1 of the proteins that binds and probably mediates the attachment of the 5S RNA into the large ribosomal subunit, where it forms part of the central protuberance. In the 70S ribosome it contacts protein S13 of the 30S subunit (bridge B1b), connecting the 2 subunits	No
COG0096	16.611	-0.13405	0.291094	-0.460505	0.645154	0.977446	NOG	2373	2022	J	One of the primary rRNA binding proteins, it binds directly to 16S rRNA central domain where it helps coordinate assembly of the platform of the 30S subunit (By similarity)	No
COG0097	14.7266	-0.019497	0.345873	-0.0563705	0.955047	0.99866	NOG	2379	2020	J	This protein binds to the 23S rRNA, and is important in its secondary structure. It is located near the subunit interface in the base of the L7 L12 stalk, and near the tRNA binding site of the peptidyltransferase center (By similarity)	No
COG0098	20.9352	0.0149705	0.291177	0.0514137	0.958996	0.99866	NOG	2542	2018	J	Located at the back of the 30S subunit body where it stabilizes the conformation of the head with respect to the body (By similarity)	No
COG0099	27.5809	-0.184187	0.404527	-0.455315	0.648883	0.977446	NOG	2275	1998	J	Located at the top of the head of the 30S subunit, it contacts several helices of the 16S rRNA. In the 70S ribosome it contacts the 23S rRNA (bridge B1a) and protein L5 of the 50S subunit (bridge B1b), connecting the 2 subunits	No
COG0100	15.0166	0.00543895	0.381787	0.014246	0.988634	0.998918	NOG	2455	2016	J	Located on the platform of the 30S subunit, it bridges several disparate RNA helices of the 16S rRNA. Forms part of the Shine-Dalgarno cleft in the 70S ribosome (By similarity)	No
COG0102	11.3651	-0.136295	0.339609	-0.401331	0.688177	0.983188	NOG	2450	2015	J	This protein is one of the early assembly proteins of the 50S ribosomal subunit, although it is not seen to bind rRNA by itself. It is important during the early stages of 50S assembly (By similarity)	No
COG0103	12.1246	-0.0607011	0.37681	-0.161092	0.872021	0.98576	NOG	2403	2010	J	30S ribosomal protein S9	No
COG0104	2.83819	0.12755	0.607752	0.209872	0.833768	0.98576	NOG	2157	1912	F	Plays an important role in the de novo pathway of purine nucleotide biosynthesis	No
COG0105	34.811	-0.133702	0.507347	-0.263531	0.792141	0.98576	NOG	2370	1663	F	Major role in the synthesis of nucleoside triphosphates other than ATP. The ATP gamma phosphate is transferred to the NDP beta phosphate via a ping-pong mechanism, using a phosphorylated active-site intermediate (By similarity)	No
COG0108	2.13693	0.807192	0.629753	1.28176	0.199927	0.977446	NOG	1955	1599	H	Catalyzes the conversion of D-ribulose 5-phosphate to formate and 3,4-dihydroxy-2-butanone 4-phosphate (By similarity)	No
COG0110	1.38834	0.128808	0.724117	0.177883	0.858815	0.98576	NOG	4075	1499	S	acetyltransferase	No
COG0111	1.5889	0.114287	0.621632	0.18385	0.854131	0.98576	NOG	4836	1758	E	Dehydrogenase	No
COG0112	4.36162	0.409548	0.466362	0.878176	0.379848	0.977446	NOG	2651	1928	E	Catalyzes the reversible interconversion of serine and glycine with tetrahydrofolate (THF) serving as the one-carbon carrier. This reaction serves as the major source of one-carbon groups required for the biosynthesis of purines, thymidylate, methionine, and other important biomolecules. Also exhibits THF- independent aldolase activity toward beta-hydroxyamino acids, producing glycine and aldehyd…	No
COG0113	3.77353	0.277325	0.667458	0.415495	0.677779	0.982338	NOG	1634	1550	H	delta-aminolevulinic acid dehydratase	No
COG0114	4.16275	-0.361562	0.485849	-0.744186	0.456764	0.977446	NOG	1421	1294	C	fumarate hydratase class II	No
COG0115	2.25789	0.747034	0.541661	1.37915	0.167848	0.977446	NOG	4325	1827	E	brancheD-chain amino acid aminotransferase	No
COG0119	5.74082	-0.183937	0.406046	-0.452996	0.650552	0.977446	NOG	4366	1680	E	Catalyzes the condensation of the acetyl group of acetyl-CoA with 3-methyl-2-oxobutanoate (2-oxoisovalerate) to form 3-carboxy-3-hydroxy-4-methylpentanoate (2-isopropylmalate) (By similarity)	No
COG0123	1.77155	0.227383	0.646642	0.351637	0.72511	0.983188	NOG	3227	1122	BQ	Histone deacetylase	No
COG0124	1.30921	0.800997	0.683166	1.17248	0.241005	0.977446	NOG	2515	2016	J	Histidyl-trna synthetase	No
COG0126	5.10638	0.126485	0.504854	0.250537	0.802172	0.98576	NOG	2267	2006	G	phosphoglycerate kinase	No
COG0128	1.43171	-0.476844	0.65584	-0.727073	0.467181	0.977446	NOG	1869	1748	E	5-enolpyruvylshikimate-3-phosphate synthase	No
COG0129	2.92695	0.231417	0.540989	0.427767	0.668821	0.980596	NOG	2823	1566	E	Dihydroxy-acid dehydratase	No
COG0130	2.22283	-0.497714	0.566324	-0.87885	0.379483	0.977446	NOG	2250	1976	J	Responsible for synthesis of pseudouridine from uracil- 55 in the psi GC loop of transfer RNAs (By similarity)	No
COG0133	1.51633	-0.125587	0.727582	-0.172608	0.862959	0.98576	NOG	1803	1543	E	The beta subunit is responsible for the synthesis of L- tryptophan from indole and L-serine (By similarity)	No
COG0136	1.37371	0.570859	0.671651	0.849934	0.395362	0.977446	NOG	2130	1806	E	Catalyzes the NADPH-dependent formation of L-aspartate- semialdehyde (L-ASA) by the reductive dephosphorylation of L- aspartyl-4-phosphate (By similarity)	No
COG0137	2.86845	-0.0135026	0.544688	-0.0247896	0.980223	0.99866	NOG	1805	1687	E	Citrulline--aspartate ligase	No
COG0138	2.25075	0.125402	0.57524	0.217999	0.82743	0.98576	NOG	2006	1790	F	bifunctional purine biosynthesis protein PURH	No
COG0142	2.55232	-0.0681499	0.610915	-0.111554	0.911177	0.989804	NOG	4797	1982	H	synthase	No
COG0143	3.37052	-0.636648	0.588524	-1.08177	0.279354	0.977446	NOG	2422	2019	J	Is required not only for elongation of protein synthesis but also for the initiation of all mRNA translation through initiator tRNA(fMet) aminoacylation (By similarity)	No
COG0144	2.29832	-0.100843	0.605192	-0.16663	0.867662	0.98576	NOG	3788	1807	J	nOP2 Sun	No
COG0147	2.41504	0.12395	0.592356	0.209248	0.834254	0.98576	NOG	3076	1599	E	synthase (Component I)	No
COG0148	19.06	-0.0206062	0.435439	-0.0473228	0.962256	0.99866	NOG	2613	1996	G	Catalyzes the reversible conversion of 2- phosphoglycerate into phosphoenolpyruvate. It is essential for the degradation of carbohydrates via glycolysis (By similarity)	No
COG0149	4.12367	0.208752	0.461031	0.452794	0.650697	0.977446	NOG	2368	2001	G	triosephosphate isomerase	No
COG0150	0.865294	0.509604	0.74491	0.684115	0.493903	0.977446	NOG	1910	1837	F	phosphoribosylaminoimidazole synthetase	No
COG0151	1.45288	0.137146	0.669364	0.20489	0.837658	0.98576	NOG	1969	1845	F	Phosphoribosylglycinamide synthetase	No
COG0153	1.33202	-0.099559	0.729205	-0.136531	0.891402	0.987751	NOG	1314	991	G	Catalyzes the transfer of the gamma-phosphate of ATP to D-galactose to form alpha-D-galactose-1-phosphate (Gal-1-P) (By similarity)	No
COG0154	4.65741	0.180166	0.566596	0.31798	0.7505	0.983188	NOG	5796	1733	J	Allows the formation of correctly charged Gln-tRNA(Gln) through the transamidation of misacylated Glu-tRNA(Gln) in organisms which lack glutaminyl-tRNA synthetase. The reaction takes place in the presence of glutamine and ATP through an activated gamma-phospho-Glu-tRNA(Gln) (By similarity)	No
COG0155	2.91392	0.0191998	0.575747	0.0333477	0.973397	0.99866	NOG	1484	1047	C	Component of the sulfite reductase complex that catalyzes the 6-electron reduction of sulfite to sulfide. This is one of several activities required for the biosynthesis of L- cysteine from sulfate (By similarity)	No
COG0156	4.58839	-0.0117908	0.466393	-0.0252809	0.979831	0.99866	NOG	3436	1442	H	8-Amino-7-oxononanoate synthase	No
COG0158	2.84842	0.687001	0.560061	1.22665	0.219953	0.977446	NOG	1173	865	G	D-fructose-1,6-bisphosphate 1-phosphohydrolase class 1	No
COG0160	2.46986	-0.269938	0.585486	-0.461049	0.644764	0.977446	NOG	2449	1054	E	transaminase activity	No
COG0162	1.11331	0.968395	0.688632	1.40626	0.159647	0.977446	NOG	2443	2018	J	Catalyzes the attachment of tyrosine to tRNA(Tyr) in a two-step reaction tyrosine is first activated by ATP to form Tyr- AMP and then transferred to the acceptor end of tRNA(Tyr) (By similarity)	No
COG0165	3.05583	-0.374796	0.478579	-0.783143	0.433543	0.977446	NOG	1846	1673	E	argininosuccinate lyase	No
COG0166	3.49848	0.0675461	0.613556	0.11009	0.912338	0.989804	NOG	2216	1918	G	glucose-6-phosphate isomerase activity	No
COG0167	0.840664	-0.42606	0.762684	-0.558632	0.576413	0.977446	NOG	2613	1906	F	Catalyzes the conversion of dihydroorotate to orotate	No
COG0168	1.73069	0.510574	0.624866	0.817094	0.413875	0.977446	NOG	2418	1451	P	Low-affinity potassium transport system. Interacts with Trk system potassium uptake protein TrkA (By similarity)	No
COG0169	1.8171	0.298816	0.683283	0.437324	0.661877	0.979123	NOG	2447	1747	E	shikimate dehydrogenase	No
COG0170	0.267985	0.165893	0.667363	0.248579	0.803686	0.98576	NOG	610	414	I	phosphatidate Cytidylyltransferase	No
COG0172	3.82984	-0.29225	0.565401	-0.51689	0.605233	0.977446	NOG	2470	2020	J	Catalyzes the attachment of serine to tRNA(Ser). Is also able to aminoacylate tRNA(Sec) with serine, to form the misacylated tRNA L-seryl-tRNA(Sec), which will be further converted into selenocysteinyl-tRNA(Sec) (By similarity)	No
COG0173	1.67163	-0.389484	0.689121	-0.56519	0.571945	0.977446	NOG	1955	1852	J	aspartyl-trna synthetase	No
COG0174	25.4933	-0.521883	0.365257	-1.42881	0.153059	0.977446	NOG	3754	1769	E	glutamine synthetase	No
COG0175	1.93758	0.322453	0.687862	0.468776	0.63923	0.977446	NOG	2498	1313	P	Reduction of activated sulfate into sulfite (By similarity)	No
COG0176	5.59673	0.88535	0.389506	2.27301	0.0230258	0.977446	NOG	2237	1640	G	Transaldolase is important for the balance of metabolites in the pentose-phosphate pathway (By similarity)	No
COG0178	3.87337	-0.803749	0.61805	-1.30046	0.193444	0.977446	NOG	2569	1690	L	The UvrABC repair system catalyzes the recognition and processing of DNA lesions. UvrA is an ATPase and a DNA-binding protein. A damage recognition complex composed of 2 UvrA and 2 UvrB subunits scans DNA for abnormalities. When the presence of a lesion has been verified by UvrB, the UvrA molecules dissociate (By similarity)	No
COG0179	3.69766	-0.0502718	0.656208	-0.0766095	0.938934	0.99866	NOG	3766	1426	Q	Fumarylacetoacetate hydrolase	No
COG0180	1.92575	0.82442	0.642313	1.28352	0.199311	0.977446	NOG	2501	2022	J	tryptophanyltRNA synthetase	No
COG0183	13.0754	0.322588	0.442484	0.72904	0.465977	0.977446	NOG	6445	1434	I	acetyl-coa acetyltransferase	No
COG0184	24.8673	-0.0952423	0.398572	-0.238959	0.811138	0.98576	NOG	2387	2001	J	Forms an intersubunit bridge (bridge B4) with the 23S rRNA of the 50S subunit in the ribosome (By similarity)	No
COG0185	25.8416	-0.0847794	0.356771	-0.23763	0.812168	0.98576	NOG	2292	1996	J	Protein S19 forms a complex with S13 that binds strongly to the 16S ribosomal RNA (By similarity)	No
COG0186	22.0291	-0.0796269	0.360472	-0.220896	0.825173	0.98576	NOG	2249	1994	J	One of the primary rRNA binding proteins, it binds specifically to the 5'-end of 16S ribosomal	No
COG0187	4.47242	-0.0313864	0.470359	-0.0667287	0.946798	0.99866	NOG	3467	1953	L	DNA gyrase negatively supercoils closed circular double- stranded DNA in an ATP-dependent manner and also catalyzes the interconversion of other topological isomers of double-stranded DNA rings, including catenanes and knotted rings (By similarity)	No
COG0188	4.76459	-0.290368	0.518056	-0.560495	0.575142	0.977446	NOG	3452	1951	L	DNA gyrase negatively supercoils closed circular double- stranded DNA in an ATP-dependent manner and also catalyzes the interconversion of other topological isomers of double-stranded DNA rings, including catenanes and knotted rings (By similarity)	No
COG0190	1.86811	0.215476	0.620939	0.347016	0.728579	0.983188	NOG	2527	1906	H	Catalyzes the oxidation of 5,10- methylenetetrahydrofolate to 5,10-methenyltetrahydrofolate and then the hydrolysis of 5,10-methenyltetrahydrofolate to 10- formyltetrahydrofolate (By similarity)	No
COG0191	9.44848	-0.0903198	0.338441	-0.26687	0.789569	0.98576	NOG	2400	1536	G	Aldolase	No
COG0192	7.26424	0.257781	0.442749	0.58223	0.560412	0.977446	NOG	2278	1875	H	Catalyzes the formation of S-adenosylmethionine from methionine and ATP	No
COG0197	23.3192	0.140886	0.289819	0.486117	0.626884	0.977446	NOG	2444	2025	J	Binds 23S rRNA and is also seen to make contacts with the A and possibly P site tRNAs (By similarity)	No
COG0198	6.5019	0.39796	0.446842	0.890607	0.37314	0.977446	NOG	2381	1995	J	One of the proteins that surrounds the polypeptide exit tunnel on the outside of the subunit (By similarity)	No
COG0199	5.10996	0.306197	0.642465	0.476597	0.633649	0.977446	NOG	2475	1970	J	Binds 16S rRNA, required for the assembly of 30S particles and may also be responsible for determining the conformation of the 16S rRNA at the A site (By similarity)	No
COG0200	20.8699	-0.160244	0.337124	-0.475327	0.634554	0.977446	NOG	2438	2016	J	Binds to the 23S rRNA (By similarity)	No
COG0201	7.29284	-0.258329	0.396906	-0.650857	0.515139	0.977446	NOG	2370	2013	U	The central subunit of the protein translocation channel SecYEG. Consists of two halves formed by TMs 1-5 and 6-10. These two domains form a lateral gate at the front which open onto the bilayer between TMs 2 and 7, and are clamped together by SecE at the back. The channel is closed by both a pore ring composed of hydrophobic SecY resides and a short helix (helix 2A) on the extracellular side of …	No
COG0202	2.70302	0.388167	0.613665	0.632539	0.527035	0.977446	NOG	2417	2016	K	DNA-dependent RNA polymerase catalyzes the transcription of DNA into RNA using the four ribonucleoside triphosphates as substrates (By similarity)	No
COG0204	4.67926	0.427603	0.543495	0.786765	0.43142	0.977446	NOG	6036	1881	I	Acyltransferase	No
COG0206	1.96216	1.7588	0.704209	2.49755	0.0125054	0.977446	NOG	2124	1732	D	Essential cell division protein that forms a contractile ring structure (Z ring) at the future cell division site. The regulation of the ring assembly controls the timing and the location of cell division. One of the functions of the FtsZ ring is to recruit other cell division proteins to the septum to produce a new cell wall between the dividing cells. Binds GTP and shows GTPase activity (By sim…	No
COG0208	2.13273	-0.224536	0.630645	-0.356041	0.72181	0.983188	NOG	1821	1412	F	Provides the precursors necessary for DNA synthesis. Catalyzes the biosynthesis of deoxyribonucleotides from the corresponding ribonucleotides (By similarity)	No
COG0209	3.70058	-0.305758	0.532874	-0.573791	0.56611	0.977446	NOG	2533	1796	F	Provides the precursors necessary for DNA synthesis. Catalyzes the biosynthesis of deoxyribonucleotides from the corresponding ribonucleotides (By similarity)	No
COG0210	6.34246	-0.781566	0.566287	-1.38016	0.167538	0.977446	NOG	4343	1887	L	helicase	No
COG0214	3.91843	-0.773149	0.495875	-1.55916	0.118958	0.977446	NOG	824	738	H	Involved in the production of pyridoxal phosphate, probably by incorporating ammonia into the pyridine ring (By similarity)	No
COG0215	2.27057	-0.32801	0.660393	-0.496689	0.619409	0.977446	NOG	2427	1994	J	Cysteinyl-tRNA synthetase	No
COG0221	11.0817	0.243707	0.515167	0.473065	0.636167	0.977446	NOG	1777	1325	C	Pyrophosphate phospho-hydrolase	No
COG0222	1.34258	0.236817	0.724258	0.326978	0.743684	0.983188	NOG	2011	1844	J	Seems to be the binding site for several of the factors involved in protein synthesis and appears to be essential for accurate translation (By similarity)	No
COG0224	4.89066	-0.460436	0.415367	-1.1085	0.267644	0.977446	NOG	2018	1794	C	Produces ATP from ADP in the presence of a proton gradient across the membrane. The gamma chain is believed to be important in regulating ATPase activity and the flow of protons through the CF(0) complex (By similarity)	No
COG0229	0.904925	-0.159787	0.739112	-0.216188	0.828841	0.98576	NOG	2200	1589	O	)-reductase	No
COG0231	11.1874	-0.201147	0.321072	-0.626485	0.530997	0.977446	NOG	2501	2003	J	Involved in peptide bond synthesis. Stimulates efficient translation and peptide-bond synthesis on native or reconstituted 70S ribosomes in vitro. Probably functions indirectly by altering the affinity of the ribosome for aminoacyl-tRNA, thus increasing their reactivity as acceptors for peptidyl transferase (By similarity)	No
COG0234	2.25838	-0.0901785	0.57811	-0.155988	0.876042	0.98576	NOG	2263	1860	O	Binds to cpn60 in the presence of Mg-ATP and suppresses the ATPase activity of the latter (By similarity)	No
COG0236	1.62274	-0.504677	0.679726	-0.742471	0.457802	0.977446	NOG	3135	1784	I	Carrier of the growing fatty acid chain in fatty acid biosynthesis (By similarity)	No
COG0240	2.60771	-1.04934	0.657437	-1.5961	0.110466	0.977446	NOG	2187	1808	C	glycerol-3-phosphate dehydrogenase	No
COG0243	4.7805	-0.11339	0.662188	-0.171235	0.864039	0.98576	NOG	4342	1081	C	molybdopterin oxidoreductase	No
COG0244	17.8198	0.307181	0.367821	0.835137	0.403641	0.977446	NOG	2485	2005	J	50s ribosomal protein L10	No
COG0246	3.59938	0.60845	0.651666	0.933684	0.350467	0.977446	NOG	1216	702	G	Mannitol dehydrogenase	No
COG0248	1.61955	0.258153	0.720887	0.358104	0.720265	0.983188	NOG	1980	1321	FP	ppx gppa phosphatase	No
COG0249	3.36606	-0.410105	0.576368	-0.711534	0.476753	0.977446	NOG	3248	1670	L	that it carries out the mismatch recognition step. This protein has a weak ATPase activity (By similarity)	No
COG0250	0.74054	-0.62797	0.737309	-0.851705	0.394378	0.977446	NOG	2122	1895	K	Participates in transcription elongation, termination and antitermination (By similarity)	No
COG0251	2.22231	0.382737	0.630295	0.607235	0.543695	0.977446	NOG	4516	1782	J	Endoribonuclease LPSP	No
COG0255	7.57888	0.453853	0.48775	0.930504	0.35211	0.977446	NOG	1886	1712	J	50s ribosomal protein l29	No
COG0256	16.9014	0.447295	0.292533	1.52904	0.126254	0.977446	NOG	2214	2010	J	This is one of the proteins that binds and probably mediates the attachment of the 5S RNA into the large ribosomal subunit, where it forms part of the central protuberance (By similarity)	No
COG0258	3.15334	-0.397808	0.556828	-0.714417	0.474969	0.977446	NOG	3320	2009	L	Structure-specific nuclease with 5'-flap endonuclease and 5'-3' exonuclease activities involved in DNA replication and repair. During DNA replication, cleaves the 5'-overhanging flap structure that is generated by displacement synthesis when DNA polymerase encounters the 5'-end of a downstream Okazaki fragment. It enters the flap from the 5'-end and then tracks to cleave the flap base, leaving a …	No
COG0263	2.1129	0.21168	0.711033	0.297708	0.765926	0.98576	NOG	1727	1559	E	Catalyzes the transfer of a phosphate group to glutamate to form glutamate 5-phosphate which rapidly cyclizes to 5- oxoproline (By similarity)	No
COG0265	4.12225	0.245961	0.522891	0.470387	0.638079	0.977446	NOG	5414	1895	O	Serine protease	No
COG0277	8.67037	0.394177	0.395445	0.996792	0.318865	0.977446	NOG	7752	1482	C	FAD linked oxidase domain protein	No
COG0278	1.39447	0.251337	0.660034	0.380795	0.703355	0.983188	NOG	1320	912	O	Glutaredoxin	No
COG0280	4.86603	0.428757	0.56676	0.756505	0.449346	0.977446	NOG	2293	1406	C	phosphate acetyltransferase	No
COG0281	6.36453	0.594861	0.469073	1.26816	0.204739	0.977446	NOG	2801	1669	C	malic enzyme	No
COG0282	2.90396	0.528554	0.7104	0.744023	0.456863	0.977446	NOG	1711	1378	C	acetate kinase activity	No
COG0285	0.933729	0.540549	0.710072	0.76126	0.446502	0.977446	NOG	2288	1849	H	Folylpolyglutamate synthase	No
COG0288	1.32375	0.162631	0.640998	0.253715	0.799716	0.98576	NOG	2270	1347	P	carbonic anhydrase	No
COG0290	1.63474	0.164101	0.714161	0.229781	0.818262	0.98576	NOG	1832	1725	J	IF-3 binds to the 30S ribosomal subunit and shifts the equilibrum between 70S ribosomes and their 50S and 30S subunits in favor of the free subunits, thus enhancing the availability of 30S subunits on which protein synthesis initiation begins (By similarity)	No
COG0293	1.69273	0.739723	0.655399	1.12866	0.259041	0.977446	NOG	1507	970	J	Specifically methylates the uridine in position 2552 of 23S rRNA at the 2'-O position of the ribose in the fully assembled 50S ribosomal subunit (By similarity)	No
COG0296	8.64576	-1.08596	0.466432	-2.32822	0.0199004	0.977446	NOG	1987	1281	G	Catalyzes the formation of the alpha-1,6-glucosidic linkages in glycogen by scission of a 1,4-alpha-linked oligosaccharide from growing alpha-1,4-glucan chains and the subsequent attachment of the oligosaccharide to the alpha-1,6 position (By similarity)	No
COG0304	5.48998	0.811256	0.452812	1.7916	0.0731975	0.977446	NOG	4177	1794	I	Catalyzes the condensation reaction of fatty acid synthesis by the addition to an acyl acceptor of two carbons from malonyl-ACP (By similarity)	No
COG0306	2.42406	-0.411848	0.636104	-0.647454	0.517338	0.977446	NOG	1890	1272	P	inorganic phosphate transmembrane transporter activity	No
COG0307	1.97849	0.10126	0.700811	0.14449	0.885114	0.98576	NOG	1644	1538	H	riboflavin synthase, subunit alpha	No
COG0308	6.31672	0.0887483	0.424818	0.208909	0.834519	0.98576	NOG	4002	1304	E	aminopeptidase	No
COG0316	1.15725	0.504991	0.737618	0.684625	0.493581	0.977446	NOG	2692	1270	S	Iron--sulfur cluster	No
COG0317	3.4094	-0.0395654	0.65299	-0.0605911	0.951685	0.99866	NOG	2683	1693	KT	In eubacteria ppGpp (guanosine 3'-diphosphate 5-' diphosphate) is a mediator of the stringent response that coordinates a variety of cellular activities in response to changes in nutritional abundance (By similarity)	No
COG0318	13.3831	-0.13424	0.381582	-0.351798	0.72499	0.983188	NOG	11187	1607	IQ	Amp-dependent synthetase and ligase	No
COG0320	1.87848	0.486071	0.65161	0.745955	0.455695	0.977446	NOG	1615	1406	H	Catalyzes the radical-mediated insertion of two sulfur atoms into the C-6 and C-8 positions of the octanoyl moiety bound to the lipoyl domains of lipoate-dependent enzymes, thereby converting the octanoylated domains into lipoylated derivatives (By similarity)	No
COG0323	2.43896	-0.341356	0.669217	-0.510082	0.609994	0.977446	NOG	2304	1627	L	This protein is involved in the repair of mismatches in DNA. It is required for dam-dependent methyl-directed DNA mismatch repair. May act as a molecular matchmaker , a protein that promotes the formation of a stable complex between two or more DNA-binding proteins in an ATP-dependent manner without itself being part of a final effector complex (By similarity)	No
COG0326	27.8071	0.197656	0.385392	0.512868	0.608043	0.977446	NOG	2241	1308	O	Molecular chaperone. Has ATPase activity (By similarity)	No
COG0329	3.1822	1.02376	0.552235	1.85385	0.0637608	0.977446	NOG	3953	1850	E	Catalyzes the condensation of (S)-aspartate-beta- semialdehyde (S)-ASA and pyruvate to 4-hydroxy- tetrahydrodipicolinate (HTPA) (By similarity)	No
COG0330	6.60502	0.60115	0.41237	1.45779	0.144897	0.977446	NOG	5268	1802	O	Band 7 protein	No
COG0331	4.94327	0.301553	0.467197	0.645451	0.518635	0.977446	NOG	2383	1776	I	Malonyl coA-acyl carrier protein transacylase	No
COG0334	3.68965	-0.732953	0.662367	-1.10657	0.268482	0.977446	NOG	2479	1553	E	oxidoreductase activity, acting on the CH-NH2 group of donors, NAD or NADP as acceptor	No
COG0337	1.52903	-0.455585	0.59816	-0.761645	0.446272	0.977446	NOG	1847	1653	E	3-dehydroquinate synthase	No
COG0339	2.19014	0.439636	0.619075	0.71015	0.477611	0.977446	NOG	1728	1040	E	oligopeptidase a	No
COG0340	0.914669	-0.52736	0.7113	-0.741403	0.458449	0.977446	NOG	1994	1863	H	Biotin- acetyl-CoA-carboxylase ligase	No
COG0345	1.19732	0.655882	0.709507	0.924419	0.355268	0.977446	NOG	2254	1762	E	pyrroline-5-carboxylate reductase activity	No
COG0346	1.39244	-0.522339	0.691193	-0.755707	0.449825	0.977446	NOG	5528	1598	E	glyoxalase bleomycin resistance protein dioxygenase	No
COG0355	2.87467	0.855324	0.554822	1.54162	0.123166	0.977446	NOG	1714	1551	C	Produces ATP from ADP in the presence of a proton gradient across the membrane (By similarity)	No
COG0358	2.14711	-0.293839	0.74967	-0.391957	0.69509	0.983188	NOG	2120	1779	L	DNA primase activity	No
COG0361	4.28533	-0.66722	0.516814	-1.29103	0.196694	0.977446	NOG	2294	2000	J	however, it seems to stimulate more or less all the activities of the other two initiation factors, IF-2 and IF-3 (By similarity)	No
COG0362	10.7593	-0.217967	0.378218	-0.576301	0.564411	0.977446	NOG	1216	1025	G	Catalyzes the oxidative decarboxylation of 6- phosphogluconate to ribulose 5-phosphate and CO(2), with concomitant reduction of NADP to NADPH (By similarity)	No
COG0363	1.33421	0.44816	0.686679	0.652648	0.513983	0.977446	NOG	2463	1495	G	Catalyzes the reversible isomerization-deamination of glucosamine 6-phosphate (GlcN6P) to form fructose 6-phosphate (Fru6P) and ammonium ion (By similarity)	No
COG0364	4.80769	0.00934549	0.423794	0.022052	0.982407	0.99866	NOG	1784	1283	G	Glucose-6-phosphate 1-dehydrogenase	No
COG0365	6.79204	-0.0465844	0.456426	-0.102064	0.918706	0.99177	NOG	4516	1425	I	Catalyzes the conversion of acetate into acetyl-CoA (AcCoA), an essential intermediate at the junction of anabolic and catabolic pathways. AcsA undergoes a two-step reaction. In the first half reaction, AcsA combines acetate with ATP to form acetyl-adenylate (AcAMP) intermediate. In the second half reaction, it can then transfer the acetyl group from AcAMP to the sulfhydryl group of CoA, forming …	No
COG0366	4.8579	-0.815916	0.495328	-1.64722	0.099512	0.977446	NOG	5803	1458	G	alpha amylase, catalytic	No
COG0367	1.80355	-0.126504	0.635597	-0.199032	0.842238	0.98576	NOG	2312	1250	E	asparagine synthetase	No
COG0369	4.80446	0.311208	0.590588	0.526947	0.598231	0.977446	NOG	2177	827	P	Component of the sulfite reductase complex that catalyzes the 6-electron reduction of sulfite to sulfide. This is one of several activities required for the biosynthesis of L- cysteine from sulfate. The flavoprotein component catalyzes the electron flow from NADPH - FAD - FMN to the hemoprotein component (By similarity)	No
COG0372	16.566	0.142443	0.304851	0.467253	0.640319	0.977446	NOG	2922	1566	C	citrate synthase	No
COG0376	14.03	0.355681	0.640223	0.555558	0.578513	0.977446	NOG	1097	683	P	Bifunctional enzyme with both catalase and broad- spectrum peroxidase activity (By similarity)	No
COG0377	1.53887	0.692664	0.627733	1.10344	0.269838	0.977446	NOG	1478	1205	C	NDH-1 shuttles electrons from NADH, via FMN and iron- sulfur (Fe-S) centers, to quinones in the respiratory chain. The immediate electron acceptor for the enzyme in this species is believed to be ubiquinone. Couples the redox reaction to proton translocation (for every two electrons transferred, four hydrogen ions are translocated across the cytoplasmic membrane), and thus conserves the redox ene…	No
COG0378	2.88048	-0.530278	0.523445	-1.01305	0.311035	0.977446	NOG	1366	988	KO	Facilitates the functional incorporation of the urease nickel metallocenter. This process requires GTP hydrolysis, probably effectuated by UreG (By similarity)	No
COG0380	5.49598	-0.368056	0.485174	-0.758606	0.448088	0.977446	NOG	1320	665	G	synthase	No
COG0386	2.13736	-0.0126864	0.633194	-0.0200356	0.984015	0.99866	NOG	2084	1120	O	glutathione peroxidase	No
COG0387	4.57568	0.291559	0.530286	0.549814	0.582447	0.977446	NOG	980	484	P	Calcium Proton	No
COG0388	3.33448	0.117124	0.581222	0.201513	0.840298	0.98576	NOG	5870	1755	S	nitrilase cyanide hydratase and apolipoprotein n-acyltransferase	No
COG0389	1.67477	-0.0643719	0.698319	-0.0921812	0.926554	0.994384	NOG	3639	1688	L	Poorly processive error-prone DNA polymerase involved in untargeted mutagenesis. Copies undamaged DNA at stalled replication forks which arise in vivo from mismatched or misaligned primer ends. These misaligned primers can be extended by polIV. Exhibits no 3-5 exonuclease (proofreading) activity. May be involved in translesional synthesis in conjunction with the beta clamp from polIII (By similar…	No
COG0398	1.64248	1.11673	0.676761	1.6501	0.0989217	0.977446	NOG	1756	955	S	Snare associated golgi protein	No
COG0401	9.85048	0.280903	0.498406	0.563602	0.573025	0.977446	NOG	484	253	S	hydrophobic protein	No
COG0403	1.81162	0.371167	0.662887	0.559925	0.575531	0.977446	NOG	1405	1316	E	The glycine cleavage system catalyzes the degradation of glycine. The P protein binds the alpha-amino group of glycine through its pyridoxal phosphate cofactor	No
COG0404	1.81993	-0.569752	0.722312	-0.788789	0.430236	0.977446	NOG	2407	1354	E	The glycine cleavage system catalyzes the degradation of glycine (By similarity)	No
COG0406	3.69497	0.47963	0.502112	0.955225	0.339464	0.977446	NOG	5118	1590	G	Phosphoglycerate mutase	No
COG0408	4.21741	0.535106	0.756515	0.70733	0.479362	0.977446	NOG	907	863	H	Key enzyme in heme biosynthesis. Catalyzes the oxidative decarboxylation of propionic acid side chains of rings A and B of coproporphyrinogen III (By similarity)	No
COG0412	2.02094	1.70906	0.62511	2.73402	0.00625662	0.977446	NOG	2240	894	Q	dienelactone hydrolase	No
COG0417	1.30732	0.567272	0.612267	0.92651	0.354181	0.977446	NOG	1570	577	L	DNA polymerase	No
COG0419	2.09808	0.118544	0.711024	0.166723	0.867588	0.98576	NOG	1504	1179	L	Involved in DNA double-strand break repair (DSBR). The Rad50 Mre11 complex possesses single-strand endonuclease activity and ATP-dependent double-strand-specific 3'-5' exonuclease activity. Rad50 provides an ATP-dependent control of Mre11 by unwinding and or repositioning DNA ends into the Mre11 active site (By similarity)	No
COG0421	3.15544	-0.530411	0.559099	-0.948689	0.342779	0.977446	NOG	1712	1137	E	Catalyzes the production of spermidine from putrescine and decarboxylated S-adenosylmethionine (dcSAM), which serves as an aminopropyl donor (By similarity)	No
COG0423	1.53682	0.807354	0.632096	1.27726	0.201509	0.977446	NOG	1122	955	J	Catalyzes the attachment of glycine to tRNA(Gly) (By similarity)	No
COG0428	1.66207	0.365561	0.700344	0.521973	0.601689	0.977446	NOG	2026	939	P	zinc transporter	No
COG0435	1.78637	1.92493	0.668765	2.87833	0.00399785	0.977446	NOG	896	612	O	glutathione Stransferase	No
COG0436	5.89017	0.46776	0.453724	1.03094	0.302571	0.977446	NOG	8308	1931	E	aminotransferase	No
COG0438	14.0937	0.388424	0.42752	0.90855	0.363588	0.977446	NOG	13206	1905	M	Glycosyl transferase (Group 1	No
COG0439	5.09051	0.556871	0.483449	1.15187	0.249374	0.977446	NOG	3031	1660	I	acetyl-CoA carboxylase biotin carboxylase	No
COG0440	1.3578	1.24584	0.717533	1.73629	0.0825134	0.977446	NOG	1686	1479	E	Acetolactate synthase small subunit	No
COG0441	4.14042	-0.426346	0.463164	-0.920506	0.357308	0.977446	NOG	2803	2016	J	threonine-tRNA ligase activity	No
COG0442	2.14711	-0.283794	0.545283	-0.520453	0.602748	0.977446	NOG	2423	2025	J	Catalyzes the attachment of proline to tRNA(Pro) in a two-step reaction proline is first activated by ATP to form Pro- AMP and then transferred to the acceptor end of tRNA(Pro). As ProRS can inadvertently accommodate and process non-cognate amino acids such as alanine and cysteine, to avoid such errors it has two additional distinct editing activities against alanine. One activity is designated a…	No
COG0443	94.904	0.0921793	0.241128	0.382284	0.702251	0.983188	NOG	7226	1957	O	Heat shock protein	No
COG0446	5.73472	0.151722	0.635862	0.238608	0.81141	0.98576	NOG	5752	1651	S	pyridine nucleotide-disulfide oxidoreductase	No
COG0449	10.6179	0.447591	0.447034	1.00125	0.316708	0.977446	NOG	2370	1905	M	Catalyzes the first step in hexosamine metabolism, converting fructose-6P into glucosamine-6P using glutamine as a nitrogen source (By similarity)	No
COG0450	9.16654	0.344679	0.492448	0.69993	0.483971	0.977446	NOG	2907	1583	O	alkyl hydroperoxide reductase	No
COG0451	5.61925	0.880617	0.566979	1.55317	0.120381	0.977446	NOG	11141	1779	M	Nad-dependent epimerase dehydratase	No
COG0452	1.60787	1.12873	0.612368	1.84322	0.0652964	0.977446	NOG	2574	1885	H	Phosphopantothenoylcysteine decarboxylase	No
COG0454	4.34287	0.0979328	0.512657	0.19103	0.848502	0.98576	NOG	7962	1701	K	acetyltransferase	No
COG0457	3.80194	1.12587	0.479166	2.34964	0.0187916	0.977446	NOG	10326	1650	S	repeat-containing protein	No
COG0458	6.07626	-0.00361445	0.40916	-0.00883384	0.992952	0.998918	NOG	2454	1845	F	carbamoyl-phosphate synthetase ammonia chain	No
COG0459	20.6471	0.28011	0.223811	1.25154	0.210736	0.977446	NOG	5192	2002	O	Prevents misfolding and promotes the refolding and proper assembly of unfolded polypeptides generated under stress conditions (By similarity)	No
COG0460	1.26062	0.189951	0.690817	0.274966	0.783342	0.98576	NOG	2131	1706	E	homoserine dehydrogenase	No
COG0462	3.01329	0.56925	0.526915	1.08035	0.279989	0.977446	NOG	3053	2002	F	Phosphoribosyl pyrophosphate synthase	No
COG0463	2.78591	0.483345	0.58478	0.826541	0.408497	0.977446	NOG	12141	1932	M	Glycosyl transferase, family 2	No
COG0464	15.4863	0.599105	0.271331	2.20802	0.0272426	0.977446	NOG	5976	1198	O	Aaa atpase	No
COG0465	7.61304	0.375277	0.442177	0.848703	0.396046	0.977446	NOG	4740	1895	O	Acts as a processive, ATP-dependent zinc metallopeptidase for both cytoplasmic and membrane proteins. Plays a role in the quality control of integral membrane proteins (By similarity)	No
COG0466	3.5098	0.132548	0.498616	0.265832	0.790369	0.98576	NOG	2259	1532	O	ATP-dependent serine protease that mediates the selective degradation of mutant and abnormal proteins as well as certain short-lived regulatory proteins. Required for cellular homeostasis and for survival from DNA damage and developmental changes induced by stress. Degrades polypeptides processively to yield small peptide fragments that are 5 to 10 amino acids long. Binds to DNA in a double-stran…	No
COG0468	1.54061	-0.223252	0.694479	-0.321468	0.747856	0.983188	NOG	3023	1997	L	Can catalyze the hydrolysis of ATP in the presence of single-stranded DNA, the ATP-dependent uptake of single-stranded DNA by duplex DNA, and the ATP-dependent hybridization of homologous single-stranded DNAs. It interacts with LexA causing its activation and leading to its autocatalytic cleavage (By similarity)	No
COG0469	3.8149	-0.307351	0.502584	-0.611541	0.540841	0.977446	NOG	2871	1873	G	Pyruvate kinase	No
COG0470	1.94998	1.24052	0.641795	1.93288	0.0532506	0.977446	NOG	3201	1760	L	DNA polymerase III subunit delta'	No
COG0471	2.00294	-0.652722	0.593302	-1.10015	0.271267	0.977446	NOG	3088	1310	P	Transporter	No
COG0473	6.03938	0.0428067	0.475524	0.09002	0.928271	0.994579	NOG	3232	1698	E	3-isopropylmalate dehydrogenase activity	No
COG0474	60.8595	-0.103564	0.355578	-0.291255	0.770856	0.98576	NOG	6160	1364	P	P-type atpase	No
COG0476	4.55385	0.591733	0.537967	1.09994	0.271357	0.977446	NOG	4244	1623	H	small protein activating enzyme activity	No
COG0477	23.7991	0.0601613	0.418659	0.1437	0.885737	0.98576	NOG	18432	1860	G	major facilitator Superfamily	No
COG0479	2.95965	0.0574277	0.525501	0.109282	0.912979	0.989804	NOG	2041	1525	C	succinate dehydrogenase	No
COG0480	28.1684	-0.153456	0.235434	-0.651799	0.514531	0.977446	NOG	4645	2024	J	Catalyzes the GTP-dependent ribosomal translocation step during translation elongation. During this step, the ribosome changes from the pre-translocational (PRE) to the post- translocational (POST) state as the newly formed A-site-bound peptidyl-tRNA and P-site-bound deacylated tRNA move to the P and E sites, respectively. Catalyzes the coordinated movement of the two tRNA molecules, the mRNA and…	No
COG0481	2.30074	-0.279836	0.631356	-0.44323	0.6576	0.977446	NOG	1994	1883	M	Required for accurate and efficient protein synthesis under certain stress conditions. May act as a fidelity factor of the translation reaction, by catalyzing a one-codon backward translocation of tRNAs on improperly translocated ribosomes. Back- translocation proceeds from a post-translocation (POST) complex to a pre-translocation (PRE) complex, thus giving elongation factor G a second chance to…	No
COG0484	8.84752	0.601875	0.524074	1.14845	0.250781	0.977446	NOG	7941	1952	O	ATP binding to DnaK triggers the release of the substrate protein, thus completing the reaction cycle. Several rounds of ATP-dependent interactions between DnaJ, DnaK and GrpE are required for fully efficient folding. Also involved, together with DnaK and GrpE, in the DNA replication of plasmids through activation of initiation proteins (By similarity)	No
COG0488	43.7002	0.00420805	0.313547	0.0134208	0.989292	0.998918	NOG	7328	1812	S	(ABC) transporter	No
COG0489	1.84541	0.216429	0.615698	0.351519	0.725199	0.983188	NOG	4121	1895	D	ATP-binding protein	No
COG0491	2.89569	0.471814	0.545751	0.864522	0.387301	0.977446	NOG	7522	1842	S	Beta-lactamase domain protein	No
COG0492	2.44196	0.373501	0.626319	0.596344	0.550946	0.977446	NOG	4039	1890	O	thioredoxin reductase	No
COG0493	4.99797	-0.393911	0.441871	-0.891461	0.372682	0.977446	NOG	3249	1556	E	metal cluster binding	No
COG0494	2.53781	-0.0112317	0.567668	-0.0197858	0.984214	0.99866	NOG	10044	1869	L	Nudix hydrolase	No
COG0495	2.54756	-0.163553	0.614002	-0.266372	0.789953	0.98576	NOG	2401	2016	J	Leucyl-trna synthetase	No
COG0498	1.73726	-0.183554	0.700552	-0.262014	0.793311	0.98576	NOG	2342	1760	E	threonine synthase	No
COG0499	10.5233	0.200233	0.360315	0.555718	0.578404	0.977446	NOG	1516	1207	H	May play a key role in the regulation of the intracellular concentration of adenosylhomocysteine (By similarity)	No
COG0500	3.67265	0.413708	0.5645	0.732876	0.463634	0.977446	NOG	11350	1891	Q	Methyltransferase	No
COG0501	2.67811	0.783185	0.562579	1.39213	0.163882	0.977446	NOG	3453	1561	O	Protease HtpX homolog	No
COG0502	1.56417	0.384394	0.661405	0.581177	0.561121	0.977446	NOG	1631	1327	H	Catalyzes the conversion of dethiobiotin (DTB) to biotin by the insertion of a sulfur atom into dethiobiotin via a radical- based mechanism (By similarity)	No
COG0503	1.15797	0.0388073	0.68116	0.0569724	0.954567	0.99866	NOG	2997	1762	F	Catalyzes a salvage reaction resulting in the formation of AMP, that is energically less costly than de novo synthesis (By similarity)	No
COG0505	5.27757	-0.309659	0.489918	-0.632062	0.527346	0.977446	NOG	2114	1821	F	carbamoyl-phosphate synthetase glutamine chain	No
COG0506	1.99183	-0.248393	0.696388	-0.356687	0.721326	0.983188	NOG	1357	1115	E	Proline dehydrogenase	No
COG0507	5.29234	-0.980619	0.633447	-1.54807	0.121606	0.977446	NOG	4352	1520	L	exodeoxyribonuclease v alpha	No
COG0508	8.09972	0.258366	0.36622	0.705493	0.480503	0.977446	NOG	4534	1519	C	Dehydrogenase	No
COG0509	0.906624	0.459829	0.719575	0.639029	0.522804	0.977446	NOG	1808	1446	E	The glycine cleavage system catalyzes the degradation of glycine. The H protein shuttles the methylamine group of glycine from the P protein to the T protein (By similarity)	No
COG0511	2.04072	0.396024	0.589519	0.671774	0.501727	0.977446	NOG	2521	1694	I	Acetyl-CoA carboxylase, biotin carboxyl carrier protein	No
COG0512	1.56842	-0.498096	0.702373	-0.709162	0.478224	0.977446	NOG	2260	1587	E	anthranilate synthase	No
COG0513	34.9805	0.180926	0.272918	0.662932	0.507374	0.977446	NOG	9254	1815	L	purine NTP-dependent helicase activity	No
COG0514	2.02792	0.277315	0.628719	0.44108	0.659155	0.977446	NOG	3359	1432	L	atp-dependent dna helicase	No
COG0515	26.4371	0.614713	0.610637	1.00668	0.314091	0.977446	NOG	36005	1484	T	Serine Threonine protein kinase	No
COG0516	2.89747	0.674979	0.553799	1.21882	0.222914	0.977446	NOG	2757	1864	F	Catalyzes the conversion of inosine 5'-phosphate (IMP) to xanthosine 5'-phosphate (XMP), the first committed and rate- limiting step in the de novo synthesis of guanine nucleotides, and therefore plays an important role in the regulation of cell growth (By similarity)	No
COG0517	6.63233	0.624197	0.396272	1.57517	0.115216	0.977446	NOG	7785	1919	S	Catalyzes the conversion of inosine 5'-phosphate (IMP) to xanthosine 5'-phosphate (XMP), the first committed and rate- limiting step in the de novo synthesis of guanine nucleotides, and therefore plays an important role in the regulation of cell growth (By similarity)	No
COG0518	2.46442	-0.015954	0.527023	-0.030272	0.97585	0.99866	NOG	3209	1933	F	Catalyzes the synthesis of GMP from XMP (By similarity)	No
COG0519	2.1621	0.0823351	0.569929	0.144466	0.885133	0.98576	NOG	2050	1932	F	Catalyzes the synthesis of GMP from XMP (By similarity)	No
COG0520	1.6269	0.669606	0.695378	0.962938	0.335578	0.977446	NOG	3792	1755	E	cysteine desulfurase	No
COG0522	31.6186	-0.0918738	0.35687	-0.257443	0.796836	0.98576	NOG	2634	2024	J	One of the primary rRNA binding proteins, it binds directly to 16S rRNA where it nucleates assembly of the body of the 30S subunit (By similarity)	No
COG0524	2.75604	-0.323286	0.566163	-0.571012	0.567992	0.977446	NOG	6665	1747	G	pfkb domain protein	No
COG0525	4.00983	-0.0750906	0.533159	-0.140841	0.887996	0.986213	NOG	2320	2016	J	amino acids such as threonine, to avoid such errors, it has a posttransfer editing activity that hydrolyzes mischarged Thr-tRNA(Val) in a tRNA-dependent manner (By similarity)	No
COG0526	12.7077	0.402635	0.434861	0.925892	0.354502	0.977446	NOG	13718	2015	O	Thioredoxin	No
COG0527	1.96979	-0.550565	0.648593	-0.84886	0.395959	0.977446	NOG	2906	1804	E	Aspartokinase	No
COG0529	1.24969	0.00734155	0.708759	0.0103583	0.991735	0.998918	NOG	1238	951	P	Catalyzes the synthesis of activated sulfate (By similarity)	No
COG0531	15.3587	0.631703	0.412139	1.53274	0.125339	0.977446	NOG	10662	1566	E	amino acid	No
COG0532	4.82422	0.126659	0.549104	0.230666	0.817574	0.98576	NOG	2484	2014	J	One of the essential components for the initiation of protein synthesis. Protects formylmethionyl-tRNA from spontaneous hydrolysis and promotes its binding to the 30S ribosomal subunits. Also involved in the hydrolysis of GTP during the formation of the 70S ribosomal complex (By similarity)	No
COG0534	2.47941	-0.193064	0.609863	-0.316569	0.751571	0.983188	NOG	8204	1682	V	Mate efflux family protein	No
COG0537	1.22925	-0.323892	0.659212	-0.491331	0.623192	0.977446	NOG	3665	1997	FG	histidine triad (hIT) protein	No
COG0538	3.98809	0.146424	0.511471	0.286281	0.774663	0.98576	NOG	1387	1133	C	isocitrate dehydrogenase (NADp)	No
COG0539	3.29726	0.216318	0.566913	0.381571	0.70278	0.983188	NOG	2337	1850	J	thus facilitating recognition of the initiation point. It is needed to translate mRNA with a short Shine-Dalgarno (SD) purine-rich sequence (By similarity)	No
COG0540	1.99547	0.644815	0.609516	1.05791	0.290095	0.977446	NOG	1989	1857	F	aspartate transcarbamylase	No
COG0541	1.07164	1.48602	0.706372	2.10373	0.035402	0.977446	NOG	2167	2002	U	Involved in targeting and insertion of nascent membrane proteins into the cytoplasmic membrane. Binds to the hydrophobic signal sequence of the ribosome-nascent chain (RNC) as it emerges from the ribosomes. The SRP-RNC complex is then targeted to the cytoplasmic membrane where it interacts with the SRP receptor FtsY	No
COG0542	8.38101	-0.415597	0.370143	-1.1228	0.261522	0.977446	NOG	5314	1862	O	ATP-dependent CLP protease ATP-binding subunit	No
COG0543	3.66907	0.68689	0.559265	1.2282	0.219371	0.977446	NOG	3506	1422	C	cytochrome-b5 reductase activity, acting on NAD(P)H	No
COG0545	3.75233	1.10652	0.534792	2.06907	0.0385395	0.977446	NOG	4083	1121	O	Peptidyl-prolyl cis-trans isomerase	No
COG0548	2.28677	0.312846	0.615512	0.508269	0.611264	0.977446	NOG	2076	1558	E	nag kinase	No
COG0550	3.45223	-1.03158	0.648765	-1.59006	0.11182	0.977446	NOG	3498	2003	L	Releases the supercoiling and torsional tension of DNA, which is introduced during the DNA replication and transcription, by transiently cleaving and rejoining one strand of the DNA duplex. Introduces a single-strand break via transesterification at a target site in duplex DNA. The scissile phosphodiester is attacked by the catalytic tyrosine of the enzyme, resulting in the formation of a DNA-(5'…	No
COG0552	1.69949	0.115014	0.637622	0.18038	0.856855	0.98576	NOG	2092	2000	U	Involved in targeting and insertion of nascent membrane proteins into the cytoplasmic membrane. Acts as a receptor for the complex formed by the signal recognition particle (SRP) and the ribosome-nascent chain (RNC)	No
COG0553	9.03455	-0.23548	0.445919	-0.528078	0.597445	0.977446	NOG	6954	1422	L	helicase	No
COG0554	5.49259	0.0226998	0.570007	0.0398238	0.968234	0.99866	NOG	2076	1459	C	Key enzyme in the regulation of glycerol uptake and metabolism (By similarity)	No
COG0557	3.4183	0.270456	0.53826	0.502463	0.615342	0.977446	NOG	2623	1717	K	3'-5' exoribonuclease that releases 5'-nucleoside monophosphates and is involved in maturation of structured RNAs (By similarity)	No
COG0558	0.808066	-0.218695	0.756524	-0.289079	0.772521	0.98576	NOG	3139	1849	I	cdp-diacylglycerol-glycerol-3-phosphate 3-phosphatidyltransferase	No
COG0560	1.52911	0.241411	0.700001	0.344872	0.730191	0.983188	NOG	2380	1378	E	phosphoserine phosphatase activity	No
COG0561	2.63201	-0.0238334	0.593236	-0.0401752	0.967953	0.99866	NOG	5195	1599	S	,hydrolase	No
COG0563	2.82577	0.573018	0.607428	0.943351	0.345502	0.977446	NOG	3963	1956	F	Catalyzes the reversible transfer of the terminal phosphate group between ATP and AMP. Plays an important role in cellular energy homeostasis and in adenine nucleotide metabolism (By similarity)	No
COG0564	2.36475	-0.996396	0.683592	-1.45759	0.144954	0.977446	NOG	5986	1913	J	pseudouridine synthase activity	No
COG0566	1.68077	-0.418462	0.648128	-0.645647	0.518508	0.977446	NOG	4593	1877	J	Methyltransferase	No
COG0567	7.81992	-0.379848	0.351804	-1.07972	0.280268	0.977446	NOG	1518	1167	C	2-oxoglutarate dehydrogenase, E1	No
COG0568	3.71952	0.607692	0.684653	0.88759	0.374761	0.977446	NOG	3881	1700	K	Sigma factors are initiation factors that promote the attachment of RNA polymerase to specific initiation sites and are then released (By similarity)	No
COG0571	1.33587	-0.283678	0.666069	-0.425898	0.670182	0.980596	NOG	2503	1854	K	Digests double-stranded RNA. Involved in the processing of primary rRNA transcript to yield the immediate precursors to the large and small rRNAs (23S and 16S). Also processes some mRNAs, and tRNAs when they are encoded in the rRNA operon (By similarity)	No
COG0574	1.63329	-1.15105	0.753358	-1.5279	0.126538	0.977446	NOG	2394	1502	G	phosphotransferase activity, paired acceptors	No
COG0575	1.78784	1.26037	0.642309	1.96224	0.0497342	0.977446	NOG	2237	1995	I	phosphatidate Cytidylyltransferase	No
COG0577	3.35862	-0.209585	0.606089	-0.345798	0.729494	0.983188	NOG	4886	1484	V	ABC transporter (permease)	No
COG0578	2.45897	0.112997	0.663174	0.170389	0.864705	0.98576	NOG	1657	1178	C	glycerol-3-phosphate dehydrogenase	No
COG0580	4.32753	0.41971	0.59432	0.706202	0.480063	0.977446	NOG	3642	1205	G	Channel that permits osmotically driven movement of water in both directions. It is involved in the osmoregulation and in the maintenance of cell turgor during volume expansion in rapidly growing cells. It mediates rapid entry or exit of water in response to abrupt changes in osmolarity (By similarity)	No
COG0582	3.67114	-0.305404	0.686227	-0.445048	0.656285	0.977446	NOG	6882	1552	L	Integrase	No
COG0583	1.79911	-0.433863	0.71247	-0.608956	0.542554	0.977446	NOG	7202	1403	K	Transcriptional regulator	No
COG0584	1.02185	-0.56009	0.718166	-0.779889	0.435456	0.977446	NOG	3727	1542	C	glycerophosphoryl diester phosphodiesterase	No
COG0587	4.26686	-0.381733	0.646346	-0.590603	0.554787	0.977446	NOG	2340	1668	L	DNA polymerase III (alpha subunit)	No
COG0591	2.64869	-0.718791	0.735706	-0.977008	0.328565	0.977446	NOG	3583	1369	E	symporter	No
COG0596	5.01943	0.743299	0.536902	1.38442	0.166229	0.977446	NOG	11662	1757	S	Alpha beta hydrolase	No
COG0598	2.42019	0.362683	0.642914	0.564123	0.57267	0.977446	NOG	2545	1474	P	magnesium and cobalt transport protein CorA	No
COG0601	2.56384	-0.639092	0.716877	-0.891495	0.372664	0.977446	NOG	5770	1464	P	Binding-protein-dependent transport systems inner membrane component	No
COG0604	7.85443	0.511128	0.563932	0.906364	0.364743	0.977446	NOG	7763	1343	C	alcohol dehydrogenase	No
COG0605	6.29686	0.0669849	0.437065	0.153261	0.878193	0.98576	NOG	2306	1578	P	Destroys radicals which are normally produced within the cells and which are toxic to biological systems (By similarity)	No
COG0612	7.76778	0.43478	0.395871	1.09829	0.272078	0.977446	NOG	4497	1599	O	peptidase'	No
COG0615	1.38195	0.137245	0.723213	0.189772	0.849488	0.98576	NOG	1103	634	IM	cytidylyltransferase	No
COG0620	8.71744	-0.425819	0.396349	-1.07436	0.282663	0.977446	NOG	1778	1154	E	Catalyzes the transfer of a methyl group from 5- methyltetrahydrofolate to homocysteine resulting in methionine formation (By similarity)	No
COG0621	2.99878	-0.156695	0.699885	-0.223887	0.822845	0.98576	NOG	3828	1748	J	Catalyzes the methylthiolation of N6- (dimethylallyl)adenosine (i(6)A), leading to the formation of 2- methylthio-N6-(dimethylallyl)adenosine (ms(2)i(6)A) at position 37 in tRNAs that read codons beginning with uridine (By similarity)	No
COG0624	5.78938	0.279001	0.496165	0.562315	0.573901	0.977446	NOG	6728	1806	E	succinyl-diaminopimelate desuccinylase activity	No
COG0625	10.8212	0.837222	0.484903	1.72658	0.0842439	0.977446	NOG	6565	894	O	glutathione Stransferase	No
COG0626	3.96025	0.0895116	0.50031	0.178912	0.858006	0.98576	NOG	3500	1477	E	cystathionine	No
COG0628	3.07631	0.0751015	0.611471	0.122821	0.902249	0.987824	NOG	4224	1676	S	Membrane	No
COG0631	8.4229	0.778405	0.581855	1.3378	0.180962	0.977446	NOG	6407	1256	T	Phosphatase	No
COG0636	10.9578	-0.0828887	0.365849	-0.226565	0.820762	0.98576	NOG	2640	1535	C	F(1)F(0) ATP synthase produces ATP from ADP in the presence of a proton or sodium gradient. F-type ATPases consist of two structural domains, F(1) containing the extramembraneous catalytic core and F(0) containing the membrane proton channel, linked together by a central stalk and a peripheral stalk. During catalysis, ATP synthesis in the catalytic domain of F(1) is coupled via a rotary mechanism…	No
COG0637	2.31599	0.114114	0.688411	0.165765	0.868342	0.98576	NOG	4044	1559	S	HAD-superfamily hydrolase subfamily IA variant 3	No
COG0638	8.21334	0.528706	0.452362	1.16877	0.242497	0.977446	NOG	2303	464	O	The proteasome is a multicatalytic proteinase complex which is characterized by its ability to cleave peptides with Arg, Phe, Tyr, Leu, and Glu adjacent to the leaving group at neutral or slightly basic pH. The proteasome has an ATP-dependent proteolytic activity (By similarity)	No
COG0639	10.761	0.186058	0.312328	0.595712	0.551368	0.977446	NOG	5463	1448	T	serine threonine-protein phosphatase	No
COG0642	9.85434	0.220662	0.397089	0.555698	0.578417	0.977446	NOG	12227	1815	T	Histidine kinase	No
COG0643	2.19415	-0.455137	0.690461	-0.659178	0.509782	0.977446	NOG	1687	867	T	CheA signal transduction histidine kinase	No
COG0644	2.19683	0.476211	0.586411	0.812078	0.416747	0.977446	NOG	2334	1203	C	geranylgeranyl reductase	No
COG0646	2.11592	0.645525	0.700207	0.921906	0.356577	0.977446	NOG	1591	1244	E	homocysteine S-methyltransferase activity	No
COG0647	1.66312	0.363446	0.658364	0.552043	0.580919	0.977446	NOG	2172	1093	G	Hydrolase	No
COG0649	3.58029	0.465677	0.531559	0.876058	0.380999	0.977446	NOG	1476	1205	C	NDH-1 shuttles electrons from NADH, via FMN and iron- sulfur (Fe-S) centers, to quinones in the respiratory chain. The immediate electron acceptor for the enzyme in this species is believed to be ubiquinone. Couples the redox reaction to proton translocation (for every two electrons transferred, four hydrogen ions are translocated across the cytoplasmic membrane), and thus conserves the redox ene…	No
COG0652	23.0423	-0.0519273	0.291184	-0.178332	0.858462	0.98576	NOG	6393	1762	O	peptidyl-prolyl cis-trans isomerase activity	No
COG0653	2.81857	0.0399094	0.655471	0.0608866	0.951449	0.99866	NOG	2159	1715	U	Part of the Sec protein translocase complex. Interacts with the SecYEG preprotein conducting channel. Has a central role in coupling the hydrolysis of ATP to the transfer of proteins into and across the cell membrane, serving	No
COG0654	9.85211	0.586511	0.584112	1.00411	0.315328	0.977446	NOG	6569	1125	CH	oxidoreductase activity, acting on paired donors, with incorporation or reduction of molecular oxygen, NAD(P)H as one donor, and incorporation of one atom of oxygen	No
COG0655	3.57022	0.777391	0.711942	1.09193	0.274864	0.977446	NOG	2516	1140	S	Nadph-dependent fmn reductase	No
COG0656	3.90939	0.847781	0.503565	1.68356	0.092267	0.977446	NOG	4667	1249	S	reductase	No
COG0657	3.8297	0.181344	0.557304	0.325395	0.744882	0.983188	NOG	5968	1318	I	alpha beta hydrolase fold-3 domain protein	No
COG0659	2.80633	0.457205	0.583785	0.783174	0.433525	0.977446	NOG	3903	1299	P	sulfate transporter	No
COG0661	2.90539	0.316869	0.532907	0.594605	0.552107	0.977446	NOG	3145	1334	S	Required, probably indirectly, for the hydroxylation of 2-octaprenylphenol to 2-octaprenyl-6-hydroxy-phenol, the fourth step in ubiquinone biosynthesis (By similarity)	No
COG0663	1.15933	0.484972	0.74532	0.65069	0.515247	0.977446	NOG	1673	1201	S	Transferase	No
COG0664	2.62704	0.679251	0.692531	0.980825	0.326679	0.977446	NOG	6311	1643	T	transcriptional regulator, crp fnr family	No
COG0665	2.57592	0.39619	0.596869	0.663781	0.506831	0.977446	NOG	4528	1400	E	Catalyzes the last two steps in the biosynthesis of 5- methylaminomethyl-2-thiouridine (mnm(5)s(2)U) at the wobble position (U34) in tRNA. Catalyzes the FAD-dependent demodification of cmnm(5)s(2)U34 to nm(5)s(2)U34, followed by the transfer of a methyl group from S-adenosyl-L-methionine to nm(5)s(2)U34, to form mnm(5)s(2)U34 (By similarity)	No
COG0666	11.0587	0.697965	0.694882	1.00444	0.315168	0.977446	NOG	21970	1000	S	Ankyrin Repeat	No
COG0667	6.44283	0.58674	0.486506	1.20603	0.227806	0.977446	NOG	6682	1478	C	Aldo keto reductase	No
COG0668	1.85248	0.175859	0.62737	0.280311	0.779239	0.98576	NOG	4148	1687	M	Mechanosensitive ion channel	No
COG0671	2.12765	0.924061	0.641966	1.43942	0.15003	0.977446	NOG	3745	1424	I	PHOsphatase	No
COG0673	3.46213	0.734639	0.531253	1.38284	0.166713	0.977446	NOG	7318	1612	S	oxidoreductase	No
COG0674	2.2064	0.297443	0.577832	0.514758	0.606722	0.977446	NOG	2219	1025	C	Oxidoreductase required for the transfer of electrons from pyruvate to flavodoxin (By similarity)	No
COG0675	4.69261	0.749275	0.583148	1.28488	0.198834	0.977446	NOG	2897	418	L	Transposase	No
COG0676	0.981143	0.728253	0.746941	0.974981	0.32957	0.977446	NOG	670	461	G	Aldose 1epimerase	No
COG0688	1.19451	1.14996	0.664306	1.73107	0.083439	0.977446	NOG	1768	1368	I	Phosphatidylserine decarboxylase	No
COG0693	4.478	0.81879	0.502423	1.62968	0.103169	0.977446	NOG	3633	1611	S	PfpI family	No
COG0694	1.63396	1.29117	0.64272	2.00892	0.0445455	0.977446	NOG	1504	1144	O	metallo-sulfur cluster assembly	No
COG0695	1.92833	-0.528446	0.637789	-0.828559	0.407354	0.977446	NOG	3049	1393	O	Glutaredoxin	No
COG0697	3.27264	0.595481	0.604894	0.984437	0.3249	0.977446	NOG	8743	1813	EG	membrane	No
COG0699	3.15674	0.967895	0.547941	1.76642	0.0773251	0.977446	NOG	2524	576	S	Dynamin family	No
COG0702	2.13871	0.297171	0.697202	0.426233	0.669938	0.980596	NOG	4700	1340	GM	epimerase dehydratase	No
COG0705	2.29475	0.706288	0.686968	1.02812	0.303892	0.977446	NOG	3087	1544	S	rhomboid family	No
COG0706	3.19919	0.735167	0.676745	1.08633	0.277334	0.977446	NOG	2469	1864	U	Required for the insertion and or proper folding and or complex formation of integral membrane proteins into the membrane. Involved in integration of membrane proteins that insert both dependently and independently of the Sec translocase complex, as well as at least some lipoproteins	No
COG0708	1.13593	-0.0222878	0.724687	-0.030755	0.975465	0.99866	NOG	2524	1714	L	Exodeoxyribonuclease III	No
COG0710	0.886764	0.145967	0.724986	0.201337	0.840435	0.98576	NOG	693	568	E	Type I DHQase	No
COG0712	2.20914	0.755194	0.647499	1.16632	0.243483	0.977446	NOG	1804	1688	C	F(1)F(0) ATP synthase produces ATP from ADP in the presence of a proton or sodium gradient. F-type ATPases consist of two structural domains, F(1) containing the extramembraneous catalytic core and F(0) containing the membrane proton channel, linked together by a central stalk and a peripheral stalk. During catalysis, ATP synthesis in the catalytic domain of F(1) is coupled via a rotary mechanism…	No
COG0715	1.38865	1.30682	0.696194	1.87709	0.0605059	0.977446	NOG	3427	1224	P	(ABC) transporter	No
COG0716	1.36714	-0.122573	0.694526	-0.176484	0.859913	0.98576	NOG	2248	1005	C	Low-potential electron donor to a number of redox enzymes (By similarity)	No
COG0722	3.06227	-0.537551	0.507078	-1.06009	0.289101	0.977446	NOG	1391	810	E	Stereospecific condensation of phosphoenolpyruvate (PEP) and D-erythrose-4-phosphate (E4P) giving rise to 3-deoxy-D- arabino-heptulosonate-7-phosphate (DAHP) (By similarity)	No
COG0723	3.67301	-0.24887	0.457587	-0.543874	0.586528	0.977446	NOG	1660	1159	C	Component of the ubiquinol-cytochrome c reductase complex (complex III or cytochrome b-c1 complex), which is a respiratory chain that generates an electrochemical potential coupled to ATP synthesis (By similarity)	No
COG0724	6.25034	0.164698	0.45778	0.359774	0.719016	0.983188	NOG	6097	616	S	Rna-binding protein	No
COG0726	3.04359	1.1161	0.5928	1.88275	0.0597338	0.977446	NOG	4615	1494	G	4-amino-4-deoxy-alpha-L-arabinopyranosyl undecaprenyl phosphate biosynthetic process	No
COG0733	1.6768	0.679068	0.692149	0.981102	0.326542	0.977446	NOG	3518	889	P	Transporter	No
COG0736	2.36989	0.865049	0.591118	1.46341	0.143355	0.977446	NOG	1319	1244	I	Transfers the 4'-phosphopantetheine moiety from coenzyme A to a Ser of acyl-carrier-protein (By similarity)	No
COG0737	1.82316	0.407471	0.595599	0.684137	0.493889	0.977446	NOG	2756	1239	F	5-Nucleotidase	No
COG0738	3.47429	-0.0888473	0.524556	-0.169376	0.865501	0.98576	NOG	1123	457	G	Transporter	No
COG0740	1.93472	0.507166	0.682781	0.742795	0.457606	0.977446	NOG	3365	1816	O	Cleaves peptides in various proteins in a process that requires ATP hydrolysis. Has a chymotrypsin-like activity. Plays a major role in the degradation of misfolded proteins (By similarity)	No
COG0741	2.85772	-0.253068	0.687177	-0.368272	0.712671	0.983188	NOG	3913	1329	M	transglycosylase	No
COG0744	3.01373	-0.438899	0.704359	-0.623118	0.533207	0.977446	NOG	3003	1404	M	penicillin-binding protein	No
COG0745	5.91211	-1.00118	0.638282	-1.56856	0.11675	0.977446	NOG	14761	1664	T	regulatoR	No
COG0747	3.55402	-0.0819059	0.701138	-0.116819	0.907004	0.988711	NOG	4843	1298	E	Extracellular solute-binding protein, family 5	No
COG0749	2.61291	-0.382334	0.651972	-0.586427	0.557588	0.977446	NOG	2180	1836	L	DNA polymerase	No
COG0753	4.59103	-0.055561	0.462705	-0.120079	0.904421	0.988711	NOG	1758	934	P	Catalase	No
COG0760	3.63412	0.286104	0.496833	0.575855	0.564714	0.977446	NOG	3781	1553	O	peptidyl-prolyl cis-trans isomerase	No
COG0768	4.07014	0.228142	0.693676	0.328888	0.74224	0.983188	NOG	4238	1626	M	penicillin-binding protein	No
COG0778	2.27642	-0.426235	0.685738	-0.621572	0.534224	0.977446	NOG	5352	1734	C	nitroreductase	No
COG0784	3.62549	0.145955	0.574794	0.253925	0.799553	0.98576	NOG	6835	1342	T	response regulator	No
COG0790	2.47193	-0.139569	0.651775	-0.214136	0.830441	0.98576	NOG	3070	926	S	Sel1 domain protein repeat-containing protein	No
COG0804	2.80071	-1.01321	0.57775	-1.75372	0.079478	0.977446	NOG	710	613	E	Urea amidohydrolase subunit alpha	No
COG0807	2.97736	1.37028	0.554893	2.46944	0.0135324	0.977446	NOG	2207	1518	H	Catalyzes the conversion of D-ribulose 5-phosphate to formate and 3,4-dihydroxy-2-butanone 4-phosphate (By similarity)	No
COG0814	3.31438	0.0802455	0.57352	0.139918	0.888725	0.986276	NOG	4722	536	E	amino acid transport	No
COG0831	1.512	-1.28794	0.672944	-1.91388	0.0556351	0.977446	NOG	691	607	E	Urea amidohydrolase subunit gamma	No
COG0832	1.67146	-1.0884	0.67075	-1.62266	0.104661	0.977446	NOG	692	606	E	Urea amidohydrolase subunit beta	No
COG0833	10.4927	0.943088	0.503861	1.87172	0.0612452	0.977446	NOG	1094	423	E	permease	No
COG0834	2.80603	-0.335216	0.706892	-0.474211	0.63535	0.977446	NOG	6143	1420	E	(ABC) transporter	No
COG0837	1.07588	0.607901	0.717282	0.847507	0.396713	0.977446	NOG	569	502	G	glucokinase (EC 2.7.1.2)	No
COG0840	3.91216	-0.935706	0.652466	-1.43411	0.151542	0.977446	NOG	9631	906	S	Methyl-accepting chemotaxis	No
COG0841	6.40732	0.312284	0.580115	0.538314	0.590361	0.977446	NOG	6039	1218	P	acriflavin resistance protein	No
COG0842	15.218	0.396813	0.496514	0.799197	0.424176	0.977446	NOG	6472	1603	V	(ABC) transporter	No
COG0843	3.24841	-1.49833	0.539178	-2.7789	0.00545426	0.977446	NOG	1882	1040	C	Cytochrome C oxidase subunit I	No
COG0845	2.14212	-0.354794	0.645925	-0.549281	0.582813	0.977446	NOG	4573	1295	M	Efflux transporter rnd family, mfp subunit	No
COG0846	0.852668	0.424986	0.72853	0.583348	0.559659	0.977446	NOG	2898	1471	K	NAD-dependent protein deacetylase which modulates the activities of several enzymes which are inactive in their acetylated form	No
COG0847	1.72317	0.584232	0.720419	0.810961	0.417388	0.977446	NOG	4114	1570	L	DNA polymerase iii	No
COG0852	1.55407	-0.435878	0.650847	-0.669708	0.503044	0.977446	NOG	1420	1199	C	NDH-1 shuttles electrons from NADH, via FMN and iron- sulfur (Fe-S) centers, to quinones in the respiratory chain. The immediate electron acceptor for the enzyme in this species is believed to be ubiquinone. Couples the redox reaction to proton translocation (for every two electrons transferred, four hydrogen ions are translocated across the cytoplasmic membrane), and thus conserves the redox ene…	No
COG0857	2.24728	0.488796	0.646129	0.756499	0.44935	0.977446	NOG	605	538	C	Involved in acetate metabolism (By similarity)	No
COG0861	2.38334	-0.690894	0.693517	-0.996218	0.319144	0.977446	NOG	2081	1103	P	membrane protein terC	No
COG1003	1.931	0.426843	0.648663	0.658036	0.510515	0.977446	NOG	1425	1315	E	The glycine cleavage system catalyzes the degradation of glycine. The P protein binds the alpha-amino group of glycine through its pyridoxal phosphate cofactor	No
COG1004	2.32877	-0.590429	0.53376	-1.10617	0.268653	0.977446	NOG	1936	1368	M	UDP-glucose 6-dehydrogenase	No
COG1009	4.028	-1.36474	0.63051	-2.1645	0.030426	0.977446	NOG	2262	1279	C	subunit l	No
COG1011	1.51397	-0.152565	0.632676	-0.241142	0.809445	0.98576	NOG	4696	1628	S	Hydrolase	No
COG1012	22.3396	0.541775	0.28031	1.93277	0.0532644	0.977446	NOG	14029	1807	C	Dehydrogenase	No
COG1013	1.77166	-0.0989217	0.651839	-0.151758	0.879378	0.98576	NOG	2188	1034	C	Oxidoreductase required for the transfer of electrons from pyruvate to flavodoxin (By similarity)	No
COG1017	12.8951	0.206424	0.764203	0.270117	0.78707	0.98576	NOG	626	530	C	Is involved in NO detoxification in an aerobic process, termed nitric oxide dioxygenase (NOD) reaction that utilizes O(2) and NAD(P)H to convert NO to nitrate, which protects the bacterium from various noxious nitrogen compounds. Therefore, plays a central role in the inducible response to nitrosative stress (By similarity)	No
COG1018	15.5036	-0.140495	0.674456	-0.208308	0.834988	0.98576	NOG	3812	1041	C	Is involved in NO detoxification in an aerobic process, termed nitric oxide dioxygenase (NOD) reaction that utilizes O(2) and NAD(P)H to convert NO to nitrate, which protects the bacterium from various noxious nitrogen compounds. Therefore, plays a central role in the inducible response to nitrosative stress (By similarity)	No
COG1020	3.22415	-0.546367	0.529035	-1.03276	0.301716	0.977446	NOG	3921	876	Q	non-ribosomal peptide synthetase	No
COG1022	6.73685	0.396723	0.58287	0.680637	0.496101	0.977446	NOG	3261	1137	I	Amp-dependent synthetase and ligase	No
COG1024	8.56472	0.70739	0.428636	1.65033	0.0988759	0.977446	NOG	9378	1341	I	Enoyl-CoA hydratase	No
COG1025	0.915858	1.06865	0.725474	1.47304	0.140741	0.977446	NOG	875	429	O	metalloendopeptidase activity	No
COG1026	0.843753	0.227973	0.719328	0.316924	0.751301	0.983188	NOG	708	507	O	peptidase	No
COG1028	19.719	0.35417	0.47131	0.751458	0.452377	0.977446	NOG	23097	1761	S	Dehydrogenase reductase	No
COG1034	3.20447	0.404857	0.545329	0.742408	0.45784	0.977446	NOG	1368	1134	C	subunit g	No
COG1038	5.34845	0.382551	0.485656	0.787699	0.430873	0.977446	NOG	717	630	C	Catalyzes a 2-step reaction, involving the ATP-dependent carboxylation of the covalently attached biotin in the first step and the transfer of the carboxyl group to pyruvate in the second (By similarity)	No
COG1048	14.4677	-0.187971	0.281289	-0.668248	0.503975	0.977446	NOG	2279	1431	C	aconitate hydratase	No
COG1049	2.63771	-0.930364	0.743181	-1.25187	0.210618	0.977446	NOG	523	504	C	Aconitate hydratase 2	No
COG1052	15.3482	0.946917	0.537014	1.7633	0.0778497	0.977446	NOG	3418	1443	C	Dehydrogenase	No
COG1053	12.5338	-0.153595	0.400652	-0.383363	0.70145	0.983188	NOG	4026	1731	C	Succinate DeHydrogenase	No
COG1061	1.69406	-0.208556	0.618828	-0.337017	0.736104	0.983188	NOG	1952	1139	L	type iii restriction protein res subunit	No
COG1062	9.42197	0.329443	0.510973	0.644736	0.519098	0.977446	NOG	1994	900	C	alcohol dehydrogenase	No
COG1063	12.8169	0.786168	0.576919	1.3627	0.172977	0.977446	NOG	5139	1488	E	Dehydrogenase	No
COG1064	6.95759	0.594028	0.618274	0.960784	0.336661	0.977446	NOG	2827	954	C	alcohol dehydrogenase	No
COG1071	3.90228	0.28436	0.493324	0.576417	0.564334	0.977446	NOG	2536	1241	C	Dehydrogenase	No
COG1073	1.62348	-0.627621	0.623007	-1.00741	0.31374	0.977446	NOG	4651	1475	S	Hydrolase	No
COG1074	2.98997	-0.164839	0.689401	-0.239104	0.811025	0.98576	NOG	1511	1405	L	The heterodimer acts as both an ATP-dependent DNA helicase and an ATP-dependent, dual-direction single-stranded exonuclease. Recognizes the chi site generating a DNA molecule suitable for the initiation of homologous recombination. The AddA nuclease domain is required for chi fragment generation	No
COG1075	2.40561	-0.383725	0.63661	-0.602764	0.546666	0.977446	NOG	1260	633	S	Triacylglycerol Lipase	No
COG1080	2.3757	-1.37662	0.737465	-1.86669	0.0619455	0.977446	NOG	1421	1086	G	General (non sugar-specific) component of the phosphoenolpyruvate-dependent sugar phosphotransferase system (sugar PTS). This major carbohydrate active-transport system catalyzes the phosphorylation of incoming sugar substrates concomitantly with their translocation across the cell membrane. Enzyme I transfers the phosphoryl group from phosphoenolpyruvate (PEP) to the phosphoryl carrier protein (…	No
COG1084	1.67223	1.09898	0.629463	1.7459	0.0808284	0.977446	NOG	448	349	S	Involved in the biogenesis of the 60S ribosomal subunit (By similarity)	No
COG1087	1.92066	-1.12427	0.65981	-1.70393	0.0883948	0.977446	NOG	2352	1602	M	udp-glucose 4-epimerase	No
COG1088	1.46637	-0.284384	0.73346	-0.387729	0.698217	0.983188	NOG	1942	1433	M	dTDP-glucose 4-6-dehydratase	No
COG1093	1.04572	0.443116	0.673326	0.658101	0.510473	0.977446	NOG	389	349	J	translation initiation factor	No
COG1100	28.4394	0.119262	0.244574	0.487634	0.625809	0.977446	NOG	10529	520	S	GTP-binding Protein	No
COG1104	3.29296	0.103252	0.518923	0.198974	0.842283	0.98576	NOG	3018	1763	E	cysteine desulfurase	No
COG1109	7.89115	0.366202	0.499579	0.733022	0.463545	0.977446	NOG	4829	1997	G	Catalyzes the conversion of glucosamine-6-phosphate to glucosamine-1-phosphate (By similarity)	No
COG1112	3.08206	0.107371	0.558261	0.192331	0.847483	0.98576	NOG	3508	974	L	Helicase	No
COG1113	2.95591	-0.678123	0.684266	-0.991022	0.321675	0.977446	NOG	1819	534	E	amino acid	No
COG1126	2.31528	0.406152	0.71659	0.566784	0.570861	0.977446	NOG	4366	1312	E	ABC transporter, (ATP-binding protein)	No
COG1131	21.7345	0.542057	0.541136	1.0017	0.316488	0.977446	NOG	15084	1893	V	(ABC) transporter	No
COG1132	15.9169	0.292565	0.293758	0.995939	0.31928	0.977446	NOG	17101	1938	V	(ABC) transporter	No
COG1136	3.14751	0.0254062	0.709242	0.0358216	0.971425	0.99866	NOG	8240	1774	V	(ABC) transporter	No
COG1143	1.77703	-0.333686	0.619692	-0.53847	0.590253	0.977446	NOG	1648	1286	C	NDH-1 shuttles electrons from NADH, via FMN and iron- sulfur (Fe-S) centers, to quinones in the respiratory chain. The immediate electron acceptor for the enzyme in this species is believed to be ubiquinone. Couples the redox reaction to proton translocation (for every two electrons transferred, four hydrogen ions are translocated across the cytoplasmic membrane), and thus conserves the redox ene…	No
COG1155	4.18303	0.521609	0.408513	1.27685	0.201657	0.977446	NOG	811	636	C	Produces ATP from ADP in the presence of a proton gradient across the membrane. The V-type alpha chain is a catalytic subunit (By similarity)	No
COG1156	5.34363	0.263455	0.443768	0.593677	0.552728	0.977446	NOG	832	639	C	Produces ATP from ADP in the presence of a proton gradient across the membrane. The V-type beta chain is a regulatory subunit (By similarity)	No
COG1161	1.52937	-0.487343	0.636786	-0.765317	0.444083	0.977446	NOG	2507	1015	S	Required for a late step of 50S ribosomal subunit assembly. Has GTPase activity (By similarity)	No
COG1163	1.37584	0.723451	0.692038	1.04539	0.295842	0.977446	NOG	636	365	S	GTP-Binding protein	No
COG1167	2.53799	-0.0796933	0.544702	-0.146306	0.88368	0.98576	NOG	4453	1351	K	Transcriptional regulator, gntR family	No
COG1171	1.67912	0.586069	0.650884	0.900421	0.367896	0.977446	NOG	3152	1532	E	Threonine dehydratase	No
COG1175	1.89898	-0.885287	0.680931	-1.30011	0.193562	0.977446	NOG	6006	1060	P	binding-protein-dependent transport systems inner membrane Component	No
COG1185	3.62399	-0.435778	0.602785	-0.722941	0.469716	0.977446	NOG	2079	1796	J	Involved in mRNA degradation. Hydrolyzes single-stranded polyribonucleotides processively in the 3'- to 5'-direction (By similarity)	No
COG1187	2.92129	0.046465	0.664972	0.0698751	0.944293	0.99866	NOG	3611	1686	J	pseudouridine synthase activity	No
COG1190	3.50356	0.176755	0.539831	0.327428	0.743344	0.983188	NOG	2001	1697	J	lysyl-trna synthetase	No
COG1191	1.00512	-0.627429	0.748606	-0.83813	0.401958	0.977446	NOG	2108	886	K	Sigma factors are initiation factors that promote the attachment of RNA polymerase to specific initiation sites and are then released (By similarity)	No
COG1192	2.47295	-0.807499	0.681658	-1.18461	0.236171	0.977446	NOG	3898	1554	D	cobyrinic Acid a,c-diamide synthase	No
COG1196	4.36538	-0.164614	0.513237	-0.320737	0.74841	0.983188	NOG	3153	1539	D	Required for chromosome condensation and partitioning (By similarity)	No
COG1197	2.64656	-0.265063	0.713789	-0.371346	0.71038	0.983188	NOG	1676	1599	L	transcriptioN-repair coupling factor	No
COG1204	1.88264	0.217178	0.613076	0.354243	0.723156	0.983188	NOG	1558	536	L	helicase	No
COG1208	3.48379	0.086972	0.560388	0.1552	0.876664	0.98576	NOG	3158	1367	M	nucleotidyl transferase	No
COG1215	31.0075	0.632775	0.47219	1.34009	0.180218	0.977446	NOG	4437	1349	M	Glycosyl transferase, family 2	No
COG1219	2.6823	-0.216509	0.58795	-0.368244	0.712691	0.983188	NOG	2058	1799	O	ATP-dependent specificity component of the Clp protease. It directs the protease to specific substrates. Can perform chaperone functions in the absence of ClpP (By similarity)	No
COG1222	16.6686	0.0939826	0.287982	0.326349	0.74416	0.983188	NOG	2086	342	O	26S protease regulatory subunit	No
COG1224	0.874258	0.118458	0.697243	0.169894	0.865093	0.98576	NOG	591	287	K	ruvB-like	No
COG1225	1.27673	0.742451	0.702434	1.05697	0.290526	0.977446	NOG	2522	1457	O	alkyl hydroperoxide reductase Thiol specific antioxidant Mal allergen	No
COG1226	2.49936	0.228002	0.606835	0.375723	0.707123	0.983188	NOG	7625	1493	P	PotAssium voltage-gated channel	No
COG1230	5.28484	0.0990583	0.546478	0.181267	0.856158	0.98576	NOG	2656	1235	P	cation diffusion facilitator family transporter	No
COG1232	1.21263	0.381432	0.723567	0.527156	0.598086	0.977446	NOG	1010	763	H	protoporphyrinogen oxidase	No
COG1236	1.14357	-0.0132814	0.741914	-0.0179016	0.985717	0.99866	NOG	2380	1000	J	cleavage and polyadenylation	No
COG1241	1.95778	0.280449	0.622538	0.450493	0.652355	0.977446	NOG	2169	353	L	dna replication licensing factor	No
COG1245	1.28272	-0.632583	0.651584	-0.970839	0.331629	0.977446	NOG	396	339	S	ATP-binding cassette, sub-family E	No
COG1249	11.7899	-0.292427	0.411265	-0.711043	0.477058	0.977446	NOG	5913	1808	C	dihydrolipoyl dehydrogenase	No
COG1250	6.27879	-0.0863907	0.544722	-0.158596	0.873987	0.98576	NOG	3899	1256	I	Dehydrogenase	No
COG1251	5.39295	0.149387	0.706101	0.211565	0.832446	0.98576	NOG	1150	717	C	nitrite reductase	No
COG1252	2.37596	-0.387322	0.604163	-0.641089	0.521465	0.977446	NOG	2412	1220	C	Nadh dehydrogenase	No
COG1253	4.29542	0.0317653	0.656327	0.0483985	0.961399	0.99866	NOG	4033	1818	P	CBS Domain protein	No
COG1257	1.10709	0.124749	0.711756	0.17527	0.860868	0.98576	NOG	804	656	I	)-reductase	No
COG1260	3.92188	-0.255213	0.529932	-0.481595	0.630093	0.977446	NOG	675	542	I	synthase	No
COG1262	1.91931	1.44534	0.693068	2.08543	0.0370304	0.977446	NOG	2146	957	S	Sulphatase-modifying factor protein	No
COG1263	3.1973	-0.795862	0.607023	-1.31109	0.189828	0.977446	NOG	2653	650	G	PTS System	No
COG1269	1.87879	0.916349	0.662232	1.38373	0.166442	0.977446	NOG	1157	636	C	ATPase 116 kDa subunit	No
COG1278	3.43336	-0.265523	0.602463	-0.440729	0.659409	0.977446	NOG	4636	1436	K	Cold shock protein	No
COG1282	2.60988	-0.0729927	0.564247	-0.129363	0.89707	0.987824	NOG	952	854	C	The transhydrogenation between NADH and NADP is coupled to respiration and ATP hydrolysis and functions as a proton pump across the membrane (By similarity)	No
COG1287	1.51745	0.234435	0.671641	0.349047	0.727054	0.983188	NOG	691	399	S	oligosaccharyl transferase STT3 subunit	No
COG1292	3.02965	-0.326635	0.679865	-0.480441	0.630914	0.977446	NOG	1490	675	P	Transporter	No
COG1301	1.8789	0.618069	0.657641	0.939827	0.347306	0.977446	NOG	3070	1218	C	sodium dicarboxylate symporter	No
COG1304	2.3682	0.49749	0.607687	0.818662	0.412979	0.977446	NOG	2453	1267	C	Catalyzes the 1,3-allylic rearrangement of the homoallylic substrate isopentenyl (IPP) to its allylic isomer, dimethylallyl diphosphate (DMAPP) (By similarity)	No
COG1308	4.30442	-0.000635867	0.441508	-0.00144022	0.998851	1	NOG	502	342	K	nascent polypeptide-associated complex	No
COG1309	2.09657	0.182037	0.670621	0.271445	0.786049	0.98576	NOG	7359	1396	K	Transcriptional regulator	No
COG1310	4.62075	0.441559	0.426187	1.03607	0.300171	0.977446	NOG	2313	648	S	Component of the eukaryotic translation initiation factor 3 (eIF-3) complex, which is involved in protein synthesis and, together with other initiation factors, stimulates binding of mRNA and methionyl-tRNAi to the 40S ribosome (By similarity)	No
COG1329	1.28578	-0.425523	0.708834	-0.600314	0.548297	0.977446	NOG	566	524	K	Transcriptional regulator (CarD family	No
COG1358	44.2953	0.160697	0.251119	0.639925	0.522221	0.977446	NOG	2085	719	J	(ribosomal) protein	No
COG1364	0.697546	0.447757	0.76115	0.588264	0.556355	0.977446	NOG	1207	1149	E	Catalyzes two activities which are involved in the cyclic version of arginine biosynthesis the synthesis of N- acetylglutamate from glutamate and acetyl-CoA as the acetyl donor, and of ornithine by transacetylation between N(2)-acetylornithine and glutamate (By similarity)	No
COG1368	1.77795	0.990478	0.705565	1.40381	0.160376	0.977446	NOG	1438	774	M	Sulfatase	No
COG1383	17.7361	0.284972	0.419072	0.680007	0.4965	0.977446	NOG	472	343	J	Ribosomal protein	No
COG1390	1.22385	0.432312	0.646246	0.668959	0.503521	0.977446	NOG	528	396	C	Produces ATP from ADP in the presence of a proton gradient across the membrane (By similarity)	No
COG1394	0.861754	0.265843	0.742372	0.3581	0.720268	0.983188	NOG	770	633	C	Produces ATP from ADP in the presence of a proton gradient across the membrane (By similarity)	No
COG1398	7.9139	-0.0524987	0.443216	-0.11845	0.905711	0.988711	NOG	1212	630	I	desaturase	No
COG1404	13.4037	0.383953	0.419272	0.915761	0.359792	0.977446	NOG	7441	1358	O	peptidase (S8 and S53, subtilisin, kexin, sedolisin	No
COG1409	2.63572	0.444028	0.702175	0.632362	0.527151	0.977446	NOG	3416	1303	S	Hydrolyzes cAMP to 5'-AMP. Plays an important regulatory role in modulating the intracellular concentration of cAMP, thereby influencing cAMP-dependent processes (By similarity)	No
COG1410	1.87577	0.645189	0.69378	0.929961	0.352391	0.977446	NOG	1432	1194	E	methionine synthase	No
COG1448	5.46034	0.623298	0.593955	1.0494	0.293993	0.977446	NOG	1414	717	E	aminotransferase	No
COG1454	2.23158	0.456177	0.644023	0.708324	0.478744	0.977446	NOG	3178	1330	C	alcohol dehydrogenase	No
COG1471	22.4071	0.0962475	0.253411	0.379808	0.704088	0.983188	NOG	597	350	J	(ribosomal) protein	No
COG1472	4.7558	0.858555	0.591319	1.45193	0.146521	0.977446	NOG	4638	1379	G	hydrolase family 3	No
COG1488	2.85552	0.10732	0.657187	0.163303	0.87028	0.98576	NOG	1898	1589	H	Nicotinate phosphoribosyltransferase	No
COG1498	4.17412	0.176709	0.522647	0.338103	0.735286	0.983188	NOG	966	353	J	Nucleolar protein	No
COG1501	2.87118	0.905012	0.581694	1.55582	0.119751	0.977446	NOG	2548	801	G	hydrolase, family 31	No
COG1502	6.49668	0.570519	0.625619	0.911928	0.361806	0.977446	NOG	3915	1618	I	Catalyzes the reversible phosphatidyl group transfer from one phosphatidylglycerol molecule to another to form cardiolipin (CL) (diphosphatidylglycerol) and glycerol (By similarity)	No
COG1503	1.8609	0.424695	0.57682	0.73627	0.461566	0.977446	NOG	496	364	J	Peptide Chain Release Factor	No
COG1505	1.43337	0.0321035	0.760703	0.0422025	0.966337	0.99866	NOG	704	546	E	prolyl oligopeptidase	No
COG1506	1.37532	0.629125	0.654495	0.961237	0.336433	0.977446	NOG	3451	991	E	peptidase s9 prolyl oligopeptidase active site domain protein	No
COG1524	0.747076	0.309606	0.764129	0.405175	0.685349	0.983188	NOG	2280	879	S	type i phosphodiesterase nucleotide pyrophosphatase	No
COG1525	0.836766	-0.145191	0.727437	-0.199592	0.8418	0.98576	NOG	1451	853	L	nuclease	No
COG1527	0.955288	0.46495	0.704923	0.659576	0.509526	0.977446	NOG	572	480	C	ATP synthase, subunit	No
COG1530	2.29785	-0.219721	0.666126	-0.329848	0.741515	0.983188	NOG	1863	1360	J	ribonuclease	No
COG1537	0.786196	0.546357	0.762522	0.716512	0.473675	0.977446	NOG	368	336	S	May function in recognizing stalled ribosomes, interact with stem-loop structures in stalled mRNA molecules, and effect endonucleolytic cleavage of the mRNA. May play a role in the release non-functional ribosomes and degradation of damaged mRNAs. Has endoribonuclease activity (By similarity)	No
COG1538	3.64375	0.0851264	0.672723	0.12654	0.899304	0.987824	NOG	4936	981	M	Membrane	No
COG1552	10.9921	0.225156	0.348558	0.645966	0.518301	0.977446	NOG	406	304	J	Ribosomal protein	No
COG1562	0.756191	0.58563	0.763667	0.766866	0.443161	0.977446	NOG	1642	913	I	phytoene synthase	No
COG1574	1.00741	-0.0929336	0.754134	-0.123232	0.901923	0.987824	NOG	1410	797	S	amidohydrolase	No
COG1594	0.553017	0.349532	0.763935	0.457541	0.647282	0.977446	NOG	1496	352	K	DNA-dependent RNA polymerase catalyzes the transcription of DNA into RNA using the four ribonucleoside triphosphates as substrates (By similarity)	No
COG1595	2.74224	-1.17968	0.603353	-1.95521	0.0505588	0.977446	NOG	7899	1315	K	RNA Polymerase	No
COG1597	1.50878	0.758196	0.723468	1.048	0.294638	0.977446	NOG	2485	1272	I	diacylglycerol kinase	No
COG1601	3.23269	0.74537	0.506445	1.47177	0.141083	0.977446	NOG	713	353	J	translation Initiation Factor	No
COG1609	4.0006	-0.241779	0.637823	-0.37907	0.704636	0.983188	NOG	8685	1164	K	Transcriptional regulator	No
COG1621	2.93727	0.619562	0.653255	0.948423	0.342914	0.977446	NOG	1348	640	G	Hydrolase	No
COG1626	2.33006	-0.494744	0.627312	-0.788673	0.430303	0.977446	NOG	581	381	G	trehalase	No
COG1629	3.22846	-0.206109	0.640752	-0.321668	0.747704	0.983188	NOG	4688	784	P	receptor	No
COG1631	21.4081	-0.00731956	0.349055	-0.0209697	0.98327	0.99866	NOG	516	334	J	Ribosomal protein	No
COG1632	24.3191	0.0505247	0.351484	0.143747	0.8857	0.98576	NOG	472	348	J	Ribosomal protein L15	No
COG1635	1.53151	0.00441994	0.703773	0.00628035	0.994989	0.999078	NOG	269	237	H	Involved in biosynthesis of the thiamine precursor thiazole. Catalyzes the conversion of NAD and glycine to adenosine diphosphate 5-(2-hydroxyethyl)-4-methylthiazole-2-carboxylic acid (ADT), an adenylated thiazole intermediate. The reaction includes an iron-dependent sulfide transfer from a conserved cysteine residue of the protein to a thiazole intermediate. The enzyme can only undergo a single …	No
COG1643	4.81596	0.0110271	0.544536	0.0202505	0.983844	0.99866	NOG	4592	1053	L	helicase	No
COG1648	2.19884	0.0636472	0.71201	0.0893909	0.928771	0.994579	NOG	1186	1021	H	Multifunctional enzyme that catalyzes the SAM-dependent methylation of uroporphyrinogen III at position C-2 and C-7 to form precorrin-2 and then position C-12 or C-18 to form trimethylpyrrocorphin 2. It also catalyzes the conversion of precorrin-2 into siroheme. This reaction consists of the NAD- dependent oxidation of precorrin-2 into sirohydrochlorin and its subsequent ferrochelation into siroh…	No
COG1670	1.81384	0.140428	0.682885	0.205639	0.837073	0.98576	NOG	5966	1449	J	-acetyltransferase	No
COG1674	1.4939	-0.584392	0.725475	-0.80553	0.420514	0.977446	NOG	2543	1544	D	cell division protein FtsK	No
COG1717	14.3981	0.10661	0.407868	0.261383	0.793797	0.98576	NOG	543	334	J	(ribosomal) protein	No
COG1718	1.29143	0.114924	0.728546	0.157744	0.874658	0.98576	NOG	634	515	T	serine threonine-protein kinase	No
COG1723	0.744502	0.398905	0.757872	0.526349	0.598646	0.977446	NOG	537	309	S	Required for meiotic nuclear division 1 homolog (S. cerevisiae)	No
COG1727	8.88053	0.712697	0.489891	1.45481	0.145723	0.977446	NOG	448	339	J	Ribosomal protein	No
COG1741	3.71648	1.3357	0.670396	1.9924	0.0463269	0.977446	NOG	2217	1065	S	pirin domain protein	No
COG1748	1.26206	1.1856	0.683173	1.73544	0.0826631	0.977446	NOG	1144	849	E	saccharopine dehydrogenase	No
COG1752	2.92326	-0.0127317	0.544543	-0.0233804	0.981347	0.99866	NOG	2472	1166	S	K07001 NTE family protein	No
COG1785	3.30107	-2.19533	0.615559	-3.5664	0.000361912	0.265282	NOG	1256	717	P	alkaline phosphatase	No
COG1788	2.5629	0.271272	0.604465	0.448781	0.65359	0.977446	NOG	1368	844	I	Key enzyme for ketone body catabolism. Transfers the CoA moiety from succinate to acetoacetate. Formation of the enzyme-CoA intermediate proceeds via an unstable anhydride species formed between the carboxylate groups of the enzyme and substrate (By similarity)	No
COG1804	1.90282	0.0634123	0.635633	0.0997624	0.920533	0.992423	NOG	3774	839	C	l-carnitine dehydratase bile acid-inducible protein F	No
COG1813	3.48981	-0.062199	0.642863	-0.096753	0.922923	0.992666	NOG	406	330	K	Factor 1	No
COG1816	1.87418	-0.104449	0.649443	-0.160829	0.872228	0.98576	NOG	2035	909	F	adenosine deaminase	No
COG1819	3.43024	1.31394	0.662409	1.98358	0.0473024	0.977446	NOG	7478	739	S	Transferase	No
COG1840	1.70591	-0.387437	0.693185	-0.558923	0.576214	0.977446	NOG	2123	969	P	extracellular solute-binding protein, family 1	No
COG1841	23.7884	0.106008	0.310435	0.341481	0.732741	0.983188	NOG	1955	1517	J	ribosomal large subunit biogenesis	No
COG1866	20.2884	-0.376242	0.472266	-0.796673	0.425641	0.977446	NOG	973	866	C	Phosphoenolpyruvate Carboxylase	No
COG1877	4.19075	-0.051851	0.622176	-0.0833382	0.933583	0.997545	NOG	1247	602	G	trehalose biosynthetic process	No
COG1881	0.730237	-0.46549	0.749073	-0.621422	0.534322	0.977446	NOG	1823	943	S	phosphatidylethanolamine-binding protein	No
COG1889	2.99321	0.777928	0.560379	1.38822	0.165071	0.977446	NOG	436	345	J	Involved in pre-rRNA and tRNA processing. Utilizes the methyl donor S-adenosyl-L-methionine to catalyze the site-specific 2'-hydroxyl methylation of ribose moieties in rRNA and tRNA. Site specificity is provided by a guide RNA that base pairs with the substrate. Methylation occurs at a characteristic distance from the sequence involved in base pairing with the guide RNA (By similarity)	No
COG1890	40.2879	0.0307444	0.404571	0.0759925	0.939425	0.99866	NOG	542	350	J	Ribosomal protein	No
COG1894	2.68185	0.479806	0.562322	0.853259	0.393516	0.977446	NOG	1905	1207	C	Nadh dehydrogenase	No
COG1902	5.05115	0.577956	0.43524	1.3279	0.18421	0.977446	NOG	4509	1358	C	NADH flavin oxidoreductase, NADH oxidase	No
COG1905	1.14169	0.492334	0.706553	0.69681	0.485922	0.977446	NOG	1619	1157	C	Nadh dehydrogenase	No
COG1911	11.1271	-0.102953	0.388032	-0.26532	0.790763	0.98576	NOG	457	321	J	(ribosomal) protein	No
COG1928	2.25941	0.0469889	0.624349	0.0752607	0.940007	0.99866	NOG	748	382	O	dolichyl-phosphate-mannose-protein mannosyltransferase activity	No
COG1932	0.6415	1.19369	0.749394	1.59287	0.111189	0.977446	NOG	1463	1354	E	Catalyzes the reversible conversion of 3- phosphohydroxypyruvate to phosphoserine and of 3-hydroxy-2-oxo-4- phosphonooxybutanoate to phosphohydroxythreonine (By similarity)	No
COG1940	2.15737	-0.111887	0.673895	-0.16603	0.868133	0.98576	NOG	5058	1421	G	ROK family	No
COG1957	0.660821	-0.130829	0.754081	-0.173494	0.862263	0.98576	NOG	1642	825	F	nucleoside hydrolase	No
COG1958	3.64532	0.140637	0.516818	0.27212	0.78553	0.98576	NOG	2228	346	K	small nuclear ribonucleoprotein	No
COG1960	16.4451	-0.0229664	0.319347	-0.0719169	0.942668	0.99866	NOG	9610	1381	I	acyl-CoA dehydrogenase	No
COG1961	2.98997	-0.161093	0.68771	-0.234246	0.814794	0.98576	NOG	3745	1072	L	Resolvase	No
COG1972	1.39552	0.201316	0.712029	0.282736	0.777379	0.98576	NOG	1086	632	F	)-nucleoside	No
COG1997	12.5958	-0.0364625	0.348041	-0.104765	0.916562	0.990813	NOG	467	337	J	Ribosomal protein	No
COG1998	2.4785	-0.126446	0.575927	-0.219552	0.82622	0.98576	NOG	175	147	J	30S ribosomal protein S27Ae	No
COG2004	6.78271	0.0184673	0.427148	0.043234	0.965515	0.99866	NOG	542	345	J	40S ribosomal protein S24	No
COG2007	20.8964	0.181508	0.353182	0.513922	0.607307	0.977446	NOG	760	352	J	40S ribosomal protein S8	No
COG2025	1.91234	-0.0318318	0.610935	-0.0521034	0.958446	0.99866	NOG	1986	1300	C	Electron transfer flavoprotein	No
COG2030	7.18478	-0.361396	0.565234	-0.639375	0.522579	0.977446	NOG	3104	1087	I	maoc domain protein dehydratase	No
COG2032	6.07545	-0.0508979	0.514657	-0.0988968	0.92122	0.992423	NOG	1009	670	P	Destroys radicals which are normally produced within the cells and which are toxic to biological systems (By similarity)	No
COG2036	70.7909	0.175978	0.456502	0.385492	0.699873	0.983188	NOG	4598	321	B	Core component of nucleosome. Nucleosomes wrap and compact DNA into chromatin, limiting DNA accessibility to the cellular machineries which require DNA as a template. Histones thereby play a central role in transcription regulation, DNA repair, DNA replication and chromosomal stability. DNA accessibility is regulated via a complex set of post-translational modifications of histones, also called h…	No
COG2046	2.48648	-0.00947602	0.570186	-0.0166192	0.98674	0.998918	NOG	729	558	P	Catalyzes the first intracellular reaction of sulfate assimilation, forming adenosine-5'-phosphosulfate (APS) from inorganic sulfate and ATP. Plays an important role in sulfate activation as a component of the biosynthesis pathway of sulfur- containing amino acids (By similarity)	No
COG2050	0.911652	-0.67384	0.758752	-0.88809	0.374492	0.977446	NOG	3028	1348	Q	thioesterase Superfamily protein	No
COG2051	9.16269	-0.408459	0.476564	-0.857091	0.391395	0.977446	NOG	517	340	J	40s ribosomal protein S27	No
COG2053	8.99141	-0.0385892	0.519366	-0.0743005	0.940771	0.99866	NOG	393	305	J	Ribosomal protein	No
COG2057	3.0206	0.23492	0.576476	0.407511	0.683633	0.983188	NOG	1354	841	I	Key enzyme for ketone body catabolism. Transfers the CoA moiety from succinate to acetoacetate. Formation of the enzyme-CoA intermediate proceeds via an unstable anhydride species formed between the carboxylate groups of the enzyme and substrate (By similarity)	No
COG2058	10.5656	0.381579	0.444856	0.857759	0.391026	0.977446	NOG	832	339	J	Ribosomal protein	No
COG2070	5.6532	0.208329	0.530472	0.392724	0.694524	0.983188	NOG	2546	1243	S	2-Nitropropane dioxygenase	No
COG2072	2.62492	0.368534	0.544321	0.677053	0.498373	0.977446	NOG	4463	734	P	Monooxygenase	No
COG2074	0.411829	0.194489	0.679591	0.286186	0.774736	0.98576	NOG	190	102	G	2-Phosphoglycerate kinase	No
COG2075	12.4658	0.0238373	0.37468	0.0636205	0.949272	0.99866	NOG	716	351	J	Ribosomal protein	No
COG2079	3.63218	1.18858	0.581401	2.04434	0.0409198	0.977446	NOG	919	585	S	MMGE PRPD family protein	No
COG2084	2.23199	0.422205	0.641502	0.658151	0.510441	0.977446	NOG	3131	1223	I	Dehydrogenase	No
COG2086	1.68196	-0.427126	0.599348	-0.712652	0.476061	0.977446	NOG	1901	1294	C	Electron transfer flavoprotein	No
COG2092	3.52955	0.701083	0.551605	1.27099	0.203733	0.977446	NOG	553	334	J	Promotes the exchange of GDP for GTP in EF-1-alpha GDP, thus allowing the regeneration of EF-1-alpha GTP that could then be used to form the ternary complex EF-1-alpha GTP AAtRNA (By similarity)	No
COG2097	8.98414	0.0333542	0.478093	0.0697651	0.944381	0.99866	NOG	605	341	J	(ribosomal) protein	No
COG2101	2.90817	-0.0630364	0.505511	-0.124698	0.900762	0.987824	NOG	658	349	K	General factor that plays a role in the activation of archaeal genes transcribed by RNA polymerase. Binds specifically to the TATA box promoter element which lies close to the position of transcription initiation (By similarity)	No
COG2110	0.371634	0.22	0.718935	0.306009	0.759598	0.98576	NOG	1882	1001	S	appr-1-p processing domain protein	No
COG2114	2.47487	0.359329	0.723464	0.496678	0.619416	0.977446	NOG	4541	722	T	Guanylate Cyclase	No
COG2119	1.05316	-0.220304	0.694722	-0.317111	0.75116	0.983188	NOG	829	632	S	transmembrane protein 165	No
COG2124	13.2974	0.77439	0.691913	1.1192	0.263054	0.977446	NOG	21600	772	Q	Cytochrome p450	No
COG2125	21.0792	-0.0920837	0.319537	-0.288179	0.77321	0.98576	NOG	531	350	J	40s ribosomal protein s6	No
COG2126	7.1347	0.26926	0.507277	0.530794	0.595562	0.977446	NOG	451	320	J	Binds to the 23S rRNA (By similarity)	No
COG2130	3.80062	0.912937	0.582858	1.56631	0.117275	0.977446	NOG	1402	661	S	alcohol dehydrogenase	No
COG2132	3.45657	0.105644	0.614022	0.172053	0.863396	0.98576	NOG	3876	1017	Q	Multicopper oxidase	No
COG2136	0.653157	0.294971	0.751842	0.392331	0.694814	0.983188	NOG	647	319	AJ	u3 small nucleolar ribonucleoprotein	No
COG2139	13.5485	-0.0822807	0.386891	-0.212672	0.831583	0.98576	NOG	654	350	J	(ribosomal) protein	No
COG2141	2.66366	-0.358185	0.633397	-0.565499	0.571735	0.977446	NOG	4211	920	C	Monooxygenase	No
COG2147	16.1673	-0.31857	0.434044	-0.733958	0.462974	0.977446	NOG	495	342	J	ribosomal protein L19	No
COG2157	11.7463	0.565432	0.429928	1.31518	0.18845	0.977446	NOG	483	331	J	ribosomal protein	No
COG2159	1.24032	0.0175112	0.740796	0.0236383	0.981141	0.99866	NOG	1458	650	S	amidohydrolase 2	No
COG2163	27.0287	0.0412196	0.438385	0.0940262	0.925088	0.993538	NOG	1099	306	J	(ribosomal) protein	No
COG2167	6.28536	0.259285	0.383429	0.676226	0.498897	0.977446	NOG	376	281	J	Ribosomal protein	No
COG2174	8.66172	-0.0662201	0.373453	-0.177318	0.859259	0.98576	NOG	418	289	J	(ribosomal) protein	No
COG2175	0.994102	-0.561056	0.746662	-0.75142	0.4524	0.977446	NOG	1618	497	Q	dioxygenase	No
COG2183	1.84081	0.01731	0.626679	0.0276218	0.977964	0.99866	NOG	1599	1380	K	domain protein	No
COG2186	1.33579	-0.591654	0.755993	-0.782618	0.433851	0.977446	NOG	3096	887	K	GntR family transcriptional regulator	No
COG2197	3.73265	-0.34066	0.648222	-0.52553	0.599215	0.977446	NOG	8211	1346	T	Two component transcriptional regulator, LuxR family	No
COG2202	3.36482	0.648186	0.55832	1.16096	0.245659	0.977446	NOG	2852	917	T	Histidine kinase	No
COG2214	2.1409	0.527783	0.629449	0.838485	0.401759	0.977446	NOG	3382	1188	O	DNAj domain protein	No
COG2217	7.27728	-0.275297	0.480658	-0.57275	0.566814	0.977446	NOG	5705	1878	P	p-type ATPase	No
COG2224	4.5796	0.505209	0.553952	0.912008	0.361765	0.977446	NOG	795	658	C	Isocitrate lyase	No
COG2225	2.99615	0.299217	0.509058	0.587785	0.556677	0.977446	NOG	981	791	C	malate synthase	No
COG2230	2.41252	-0.102358	0.623176	-0.164252	0.869533	0.98576	NOG	1673	904	M	cyclopropane-fatty-acyl-phospholipid synthase	No
COG2233	2.88468	-0.72232	0.691474	-1.04461	0.296204	0.977446	NOG	2895	1277	F	permease	No
COG2234	5.15354	1.17409	0.548062	2.14226	0.0321728	0.977446	NOG	2932	744	S	peptidase m28	No
COG2238	7.86229	-0.310601	0.506052	-0.613773	0.539365	0.977446	NOG	476	339	J	Ribosomal protein	No
COG2252	1.9821	-0.954088	0.700553	-1.36191	0.173227	0.977446	NOG	1946	1252	S	Xanthine uracil vitamin C permease	No
COG2262	1.05886	0.28802	0.71999	0.400033	0.689132	0.983188	NOG	1801	1656	S	GTPase that associates with the 50S ribosomal subunit and may have a role during protein synthesis or ribosome biogenesis (By similarity)	No
COG2267	2.06326	0.16667	0.615693	0.270703	0.786619	0.98576	NOG	2113	1159	I	alpha beta hydrolase fold	No
COG2268	1.33223	0.650418	0.754382	0.862186	0.388585	0.977446	NOG	795	559	S	Band 7 protein	No
COG2272	1.18901	1.05405	0.716814	1.47047	0.141435	0.977446	NOG	4329	526	I	Carboxylesterase	No
COG2273	4.40801	0.746046	0.62783	1.18829	0.234718	0.977446	NOG	1955	509	G	hydrolase family 16	No
COG2303	21.1943	0.7456	0.571614	1.30438	0.192105	0.977446	NOG	4335	945	E	oxidoreductase	No
COG2319	2.29772	0.975988	0.640717	1.52328	0.12769	0.977446	NOG	3206	570	S	wd repeat	No
COG2340	2.07523	1.12644	0.693958	1.62321	0.104545	0.977446	NOG	3193	791	S	Scp-like extracellular	No
COG2352	3.18496	1.05775	0.705352	1.49961	0.133717	0.977446	NOG	1000	849	C	phosphoenolpyruvate carboxylase activity	No
COG2365	0.907134	0.346117	0.761743	0.454375	0.649559	0.977446	NOG	1191	615	T	protein tyrosine serine phosphatase	No
COG2451	7.38906	-0.370481	0.514225	-0.720465	0.471239	0.977446	NOG	383	248	J	Ribosomal protein	No
COG2453	2.60236	1.39983	0.705895	1.98306	0.0473604	0.977446	NOG	4121	455	T	dual specificity phosphatase	No
COG2513	0.917408	0.0344869	0.740731	0.0465579	0.962866	0.99866	NOG	1318	775	G	methylisocitrate lyase	No
COG2518	0.698677	0.456411	0.760543	0.600112	0.548431	0.977446	NOG	1776	1078	O	Catalyzes the methyl esterification of L-isoaspartyl residues in peptides and proteins that result from spontaneous decomposition of normal L-aspartyl and L-asparaginyl residues. It plays a role in the repair and or degradation of damaged proteins (By similarity)	No
COG2609	2.6236	0.0477311	0.689497	0.069226	0.94481	0.99866	NOG	817	653	C	Component of the pyruvate dehydrogenase (PDH) complex, that catalyzes the overall conversion of pyruvate to acetyl-CoA and CO(2) (By similarity)	No
COG2706	1.23501	1.11992	0.758878	1.47576	0.140008	0.977446	NOG	851	618	G	6-phosphogluconolactonase	No
COG2723	2.71282	0.753963	0.664162	1.13521	0.256288	0.977446	NOG	3564	877	G	beta-glucosidase	No
COG2730	7.86367	0.778171	0.706577	1.10133	0.270755	0.977446	NOG	1526	442	G	Glycoside hydrolase Family 5	No
COG2755	2.03578	0.129194	0.606073	0.213165	0.831198	0.98576	NOG	3081	1375	E	lipolytic protein G-D-S-L family	No
COG2759	1.34887	-0.147629	0.653119	-0.226036	0.821173	0.98576	NOG	1245	1048	F	formyltetrahydrofolate synthetase	No
COG2770	2.07044	-0.083866	0.705968	-0.118796	0.905437	0.988711	NOG	370	264	T	Histidine kinase	No
COG2801	9.40128	-0.225597	0.430237	-0.524355	0.600032	0.977446	NOG	23892	1264	L	Retrotransposon protein	No
COG2826	2.72875	-0.745397	0.669855	-1.11277	0.265806	0.977446	NOG	1734	395	L	transposase	No
COG2828	1.40166	0.347092	0.756914	0.458562	0.646548	0.977446	NOG	490	381	S	AcnD-accessory protein PrpF	No
COG2838	1.84239	-0.0870522	0.696169	-0.125045	0.900488	0.987824	NOG	489	473	C	Isocitrate dehydrogenase	No
COG2857	3.21738	0.299228	0.532451	0.561982	0.574128	0.977446	NOG	991	818	C	cytochrome c1	No
COG2866	2.39091	-0.116792	0.643463	-0.181505	0.855971	0.98576	NOG	2548	737	E	metallocarboxypeptidase activity	No
COG2885	2.28124	0.391774	0.665528	0.588667	0.556085	0.977446	NOG	4369	1036	M	Ompa motb domain protein	No
COG2890	1.12384	-0.0218819	0.749247	-0.0292052	0.976701	0.99866	NOG	3121	1994	J	Methylates the class 1 translation termination release factors RF1 PrfA and RF2 PrfB on the glutamine residue of the universally conserved GGQ motif (By similarity)	No
COG2896	0.741177	0.347507	0.731289	0.475197	0.634646	0.977446	NOG	1630	1405	H	Catalyzes, together with MoaC, the conversion of 5'-GTP to cyclic pyranopterin monophosphate (cPMP or molybdopterin precursor Z) (By similarity)	No
COG2897	1.59228	-0.015751	0.629876	-0.0250066	0.98005	0.99866	NOG	1753	1042	P	sulfurtransferase	No
COG2902	4.88116	0.446374	0.578112	0.772123	0.440042	0.977446	NOG	637	539	E	Dehydrogenase	No
COG2930	3.96477	0.79684	0.686044	1.1615	0.245438	0.977446	NOG	698	366	S	SH3 domain containing, Ysc84-like 1 (S. cerevisiae)	No
COG2931	1.36104	-1.97168	0.707091	-2.78844	0.00529632	0.977446	NOG	1708	520	Q	Hemolysin-type calcium-binding	No
COG2937	1.26099	-0.334305	0.719977	-0.464327	0.642414	0.977446	NOG	611	473	I	glycerol3phosphate acyltransferase	No
COG2939	4.93908	0.688466	0.60285	1.14202	0.253446	0.977446	NOG	2644	405	E	carboxy-peptidase	No
COG2940	2.99243	0.818572	0.676134	1.21066	0.226024	0.977446	NOG	5633	408	S	Histone-lysine N-methyltransferase	No
COG3000	3.57985	-1.03287	0.628584	-1.64316	0.100349	0.977446	NOG	2328	697	I	fatty acid hydroxylase	No
COG3104	3.99887	-0.124141	0.569187	-0.218103	0.827349	0.98576	NOG	3528	848	E	transporter	No
COG3173	0.703781	0.0880305	0.753636	0.116808	0.907012	0.988711	NOG	1138	600	S	Aminoglycoside phosphotransferase	No
COG3175	0.437814	0.325178	0.727706	0.446854	0.654981	0.977446	NOG	603	574	O	Cytochrome C oxidase assembly protein	No
COG3185	1.49048	1.08269	0.641062	1.68891	0.091237	0.977446	NOG	922	644	E	4-Hydroxyphenylpyruvate dioxygenase	No
COG3217	0.731323	0.381465	0.754495	0.50559	0.613144	0.977446	NOG	936	613	S	MOSC domain-containing protein	No
COG3239	3.65608	0.597155	0.499321	1.19593	0.231722	0.977446	NOG	1426	629	I	linoleoyl-CoA desaturase activity	No
COG3250	3.01413	-0.258829	0.637383	-0.406081	0.684683	0.983188	NOG	3092	885	G	hydrolase family 2	No
COG3288	1.72684	0.069834	0.636731	0.109676	0.912666	0.989804	NOG	1383	850	C	The transhydrogenation between NADH and NADP is coupled to respiration and ATP hydrolysis and functions as a proton pump across the membrane (By similarity)	No
COG3293	4.49206	-0.244528	0.675534	-0.361977	0.717369	0.983188	NOG	2789	375	L	transposase	No
COG3320	1.46428	0.0811395	0.637781	0.127222	0.898765	0.987824	NOG	853	356	Q	domain protein	No
COG3325	10.5413	0.629395	0.734446	0.856966	0.391464	0.977446	NOG	2208	468	G	chitinase	No
COG3338	0.997461	0.858946	0.69969	1.22761	0.219594	0.977446	NOG	1888	395	P	Carbonic anhydrase	No
COG3384	1.36175	0.609029	0.739402	0.823678	0.410122	0.977446	NOG	870	630	S	extradiol ring-cleavage dioxygenase class IIi protein subunit b	No
COG3385	2.46818	-1.22134	0.686711	-1.77854	0.0753155	0.977446	NOG	1360	254	L	transposase	No
COG3386	3.15231	0.484023	0.700207	0.691258	0.489403	0.977446	NOG	2175	759	G	SMP-30 gluconolaconase LRE domain protein	No
COG3387	1.09751	-0.0300146	0.708614	-0.0423567	0.966214	0.99866	NOG	1022	584	G	glycoside hydrolase 15-related	No
COG3425	1.55104	0.83995	0.697543	1.20415	0.22853	0.977446	NOG	744	576	I	hydroxymethylglutaryl-CoA synthase activity	No
COG3451	1.81204	-0.605657	0.737055	-0.821725	0.411233	0.977446	NOG	922	489	U	type IV secretion system protein	No
COG3464	2.2105	-0.302894	0.715833	-0.423135	0.672197	0.982336	NOG	2113	443	L	transposase	No
COG3474	5.31272	0.707075	0.460125	1.5367	0.124367	0.977446	NOG	954	470	C	Electron carrier protein. The oxidized form of the cytochrome c heme group can accept an electron from the heme group of the cytochrome c1 subunit of cytochrome reductase. Cytochrome c then transfers this electron to the cytochrome oxidase complex, the final protein carrier in the mitochondrial electron-transport chain	No
COG3485	5.46836	0.308995	0.720042	0.429135	0.667825	0.980596	NOG	1214	435	Q	protocatechuate 3,4-dioxygenase	No
COG3486	0.930071	-0.347381	0.73666	-0.471562	0.63724	0.977446	NOG	422	302	Q	L-lysine 6-monooxygenase (NADPH)	No
COG3491	1.74418	0.784825	0.668529	1.17396	0.240411	0.977446	NOG	3881	498	S	2OGFe(II) oxygenase	No
COG3508	2.55247	0.23918	0.693599	0.344839	0.730215	0.983188	NOG	654	554	Q	homogentisate 1,2-dioxygenase activity	No
COG3509	1.53478	-0.315817	0.720632	-0.438249	0.661206	0.979119	NOG	655	336	Q	depolymerase	No
COG3569	1.40536	-0.0825917	0.670846	-0.123116	0.902015	0.987824	NOG	572	473	L	Dna topoisomerase	No
COG3590	1.17893	1.11015	0.72542	1.53035	0.125929	0.977446	NOG	1924	649	O	endothelin-converting enzyme	No
COG3616	0.568752	0.991829	0.761803	1.30195	0.192934	0.977446	NOG	754	511	E	alanine racemase domain protein	No
COG3634	0.677003	-0.0346953	0.760471	-0.0456234	0.96361	0.99866	NOG	465	431	O	alkyl hydroperoxide reductase activity	No
COG3648	3.75468	1.25597	0.555429	2.26126	0.0237429	0.977446	NOG	265	246	Q	Catalyzes the oxidation of uric acid to 5- hydroxyisourate, which is further processed to form (S)-allantoin (By similarity)	No
COG3675	1.27481	0.970223	0.742227	1.30718	0.191152	0.977446	NOG	672	168	S	Lipase class 3 family protein	No
COG3696	1.95269	0.153522	0.74889	0.204999	0.837573	0.98576	NOG	1445	551	P	Heavy metal efflux pump, CzcA	No
COG3733	1.10667	0.228038	0.759482	0.300254	0.763983	0.98576	NOG	785	251	Q	amine oxidase	No
COG3752	0.997441	-0.23771	0.762286	-0.311838	0.755164	0.983188	NOG	467	305	S	DUF1295 domain protein	No
COG3774	0.756751	0.216565	0.761408	0.284426	0.776084	0.98576	NOG	577	247	M	glycosyltransferase	No
COG3781	1.57837	0.888319	0.686146	1.29465	0.195441	0.977446	NOG	555	353	S	UPF0187 protein	No
COG3791	2.4539	0.406253	0.651267	0.623788	0.532767	0.977446	NOG	1571	581	S	Glutathione-dependent formaldehyde-activating Gfa	No
COG3808	2.71408	0.13661	0.662997	0.206049	0.836753	0.98576	NOG	902	672	C	pump that utilizes the energy of pyrophosphate hydrolysis as the driving force for	No
COG3812	0.330009	0.224461	0.75053	0.29907	0.764887	0.98576	NOG	264	202	S	Domain of unknown function (DUF1993)	No
COG3866	1.83391	1.00585	0.71837	1.40019	0.161458	0.977446	NOG	727	180	G	pectate lyase activity	No
COG3869	0.849198	0.669102	0.762351	0.877682	0.380117	0.977446	NOG	673	350	E	ATP guanido phosphotransferase	No
COG3914	1.35513	0.302646	0.665169	0.454991	0.649115	0.977446	NOG	664	389	O	protein N-acetylglucosaminyltransferase activity	No
COG3934	1.30971	0.55316	0.763829	0.724194	0.468947	0.977446	NOG	421	165	G	Mannan endo-1,4-beta-mannosidase	No
COG3957	3.94226	-0.238478	0.743706	-0.320662	0.748466	0.983188	NOG	572	459	G	Phosphoketolase	No
COG3961	4.46706	0.148218	0.749902	0.19765	0.843319	0.98576	NOG	589	306	GH	Pyruvate decarboxylase	No
COG3979	0.707511	0.986023	0.751483	1.3121	0.189485	0.977446	NOG	999	268	G	chitinase	No
COG4122	1.89641	0.485396	0.704617	0.688879	0.4909	0.977446	NOG	1814	1082	S	O-methyltransferase	No
COG4166	3.74848	-0.580459	0.627826	-0.924554	0.355198	0.977446	NOG	2570	972	E	peptide transport	No
COG4221	2.59534	-0.213135	0.638676	-0.333713	0.738596	0.983188	NOG	2056	1144	S	serine 3-dehydrogenase activity	No
COG4281	0.52388	1.07153	0.757254	1.41501	0.157064	0.977446	NOG	851	292	I	Acyl-CoA binding domain containing	No
COG4284	11.6042	0.418622	0.32018	1.30746	0.191057	0.977446	NOG	837	358	G	pyrophosphorylase	No
COG4301	0.464387	0.507403	0.753752	0.673169	0.50084	0.977446	NOG	493	412	S	Methyltransferase	No
COG4352	9.63919	0.268646	0.56219	0.477856	0.632753	0.977446	NOG	356	251	J	cytoplasmic translation	No
COG4581	1.66364	0.0236026	0.588756	0.0400889	0.968022	0.99866	NOG	1246	518	L	helicase	No
COG4630	1.03537	0.770076	0.699265	1.10127	0.270781	0.977446	NOG	875	457	F	xanthine dehydrogenase	No
COG4631	1.28775	0.517161	0.644825	0.802018	0.422543	0.977446	NOG	917	416	F	xanthine dehydrogenase	No
COG4677	1.36744	0.619856	0.742083	0.835292	0.403553	0.977446	NOG	1505	244	G	pectinesterase	No
COG4690	1.19549	0.415494	0.762583	0.544851	0.585856	0.977446	NOG	797	398	E	dipeptidase activity	No
COG4770	2.2888	0.579623	0.632472	0.916441	0.359436	0.977446	NOG	1385	778	I	carboxylase	No
COG4775	1.21288	-0.0446245	0.70303	-0.0634746	0.949389	0.99866	NOG	1526	1259	M	Gram-negative-bacterium-type cell outer membrane assembly	No
COG4799	4.62579	0.343706	0.557167	0.616882	0.537313	0.977446	NOG	2761	1225	I	carboxylase	No
COG4830	19.4945	0.0723574	0.372738	0.194124	0.846079	0.98576	NOG	389	265	J	Ribosomal protein	No
COG4870	5.98113	0.738901	0.75649	0.976749	0.328693	0.977446	NOG	3530	321	O	cathepsin	No
COG4886	3.33797	-0.0842865	0.614468	-0.13717	0.890897	0.987751	NOG	26124	701	S	leucine Rich Repeat	No
COG4901	6.50964	0.183861	0.431768	0.425832	0.67023	0.980596	NOG	374	249	J	Ribosomal protein S25	No
COG4948	1.99525	-0.0117262	0.607326	-0.019308	0.984595	0.99866	NOG	3341	1172	M	mandelate racemase muconate lactonizing	No
COG4981	2.15756	0.676309	0.670967	1.00796	0.313473	0.977446	NOG	227	148	I	Fatty acid synthase	No
COG4982	2.58494	0.723485	0.583451	1.24001	0.214971	0.977446	NOG	219	148	I	fatty acid synthase	No
COG4992	6.07703	-1.19589	0.444314	-2.69153	0.00711245	0.977446	NOG	2780	1657	E	Acetylornithine aminotransferase	No
COG5019	7.41686	-0.0156114	0.525196	-0.0297249	0.976286	0.99866	NOG	1311	178	DZ	Cell division control protein	No
COG5020	0.875308	-0.228312	0.727965	-0.31363	0.753802	0.983188	NOG	370	87	G	glycosyltransferase family 15 protein	No
COG5021	11.3174	0.180041	0.564416	0.318986	0.749737	0.983188	NOG	3999	239	O	ubiquitin protein ligase	No
COG5022	15.3991	0.569488	0.538393	1.05776	0.290167	0.977446	NOG	4528	236	Z	myosin heavy chain	No
COG5023	40.8591	-0.404109	0.395922	-1.02068	0.307407	0.977446	NOG	3144	238	Z	protein polymerization	No
COG5024	0.9518	0.528954	0.760692	0.695359	0.486831	0.977446	NOG	1856	228	D	g2 mitotic-specific	No
COG5025	0.53053	1.13483	0.75512	1.50284	0.13288	0.977446	NOG	2966	200	K	forkhead box	No
COG5028	1.9127	1.0082	0.697146	1.44619	0.148125	0.977446	NOG	758	238	U	SEC24 family, member	No
COG5030	1.75144	1.25229	0.648876	1.92994	0.0536145	0.977446	NOG	1044	238	U	Adaptor-related protein complex	No
COG5032	3.52172	0.841155	0.622834	1.35053	0.176846	0.977446	NOG	2422	238	BDLTU	phosphatidylinositol kinase activity	No
COG5035	1.74886	0.641299	0.697032	0.920043	0.35755	0.977446	NOG	537	235	DKT	Cell cycle control protein	No
COG5037	0.997031	0.713195	0.758948	0.939716	0.347363	0.977446	NOG	180	85	GT	Regulatory protein	No
COG5038	1.49414	0.579243	0.711052	0.814628	0.415285	0.977446	NOG	1086	215	S	Domain-Containing protein	No
COG5040	21.6526	-0.494799	0.308676	-1.60297	0.108941	0.977446	NOG	1095	236	T	Tyrosine 3-monooxygenase tryptophan 5-monooxygenase activation protein	No
COG5041	1.70136	0.994954	0.655028	1.51895	0.128775	0.977446	NOG	539	231	DKT	casein kinase ii	No
COG5043	4.08624	1.14395	0.68106	1.67967	0.0930225	0.977446	NOG	858	235	U	Vacuolar Protein	No
COG5044	2.79226	0.55887	0.577817	0.967211	0.333439	0.977446	NOG	649	238	O	GDP dissociation inhibitor	No
COG5045	8.03763	0.126616	0.496946	0.254788	0.798887	0.98576	NOG	387	228	J	Ribosomal protein	No
COG5047	1.42862	-0.158879	0.618591	-0.25684	0.797302	0.98576	NOG	480	238	U	transport protein	No
COG5048	11.7712	0.524663	0.608611	0.862066	0.388651	0.977446	NOG	35396	237	S	Zinc finger protein	No
COG5049	0.683695	0.709062	0.756555	0.937225	0.348643	0.977446	NOG	609	235	ADL	5'-3' exoribonuclease	No
COG5050	0.929952	1.01347	0.755046	1.34226	0.179512	0.977446	NOG	572	240	I	phosphotransferase 1	No
COG5051	7.79004	0.137918	0.429412	0.321178	0.748076	0.983188	NOG	342	220	J	60S ribosomal protein l36	No
COG5052	3.31081	1.42976	0.634132	2.25467	0.0241542	0.977446	NOG	978	220	U	receptor accessory protein	No
COG5053	1.92259	-0.188543	0.602418	-0.312977	0.754298	0.983188	NOG	858	234	J	eukaryotic translation initiation factor	No
COG5058	0.847085	0.299048	0.730257	0.40951	0.682165	0.983188	NOG	774	228	U	ceramide synthase	No
COG5059	4.1229	0.427886	0.651681	0.656588	0.511446	0.977446	NOG	7141	238	Z	Kinesin family member	No
COG5061	1.12331	0.137154	0.760262	0.180404	0.856835	0.98576	NOG	322	230	OU	S. cerevisiae	No
COG5064	3.56035	1.24588	0.480796	2.59129	0.00956164	0.977446	NOG	1084	236	U	importin subunit alpha	No
COG5069	5.72863	0.693373	0.565639	1.22582	0.220265	0.977446	NOG	3832	221	Z	Microtubule associated monoxygenase, calponin and LIM domain containing	No
COG5070	1.64731	0.73596	0.694502	1.05969	0.289284	0.977446	NOG	542	217	U	Solute carrier family 35	No
COG5071	1.30503	0.408637	0.7175	0.569529	0.568997	0.977446	NOG	276	235	O	26S proteasome non-ATPase regulatory subunit	No
COG5074	0.665473	0.655529	0.755181	0.868042	0.385371	0.977446	NOG	847	233	U	SYNtaxin	No
COG5076	2.87621	0.124008	0.619864	0.200056	0.841436	0.98576	NOG	3125	231	BK	bromodomain	No
COG5077	1.79572	0.220334	0.743935	0.296174	0.767097	0.98576	NOG	1595	237	O	ubiquitin carboxyl-terminal hydrolase	No
COG5078	12.2996	0.269995	0.323682	0.834136	0.404204	0.977446	NOG	4169	238	O	ubiquitin-conjugating enzyme	No
COG5081	0.283434	0.403199	0.728058	0.553801	0.579715	0.977446	NOG	331	190	S	S. cerevisiae	No
COG5082	2.92596	0.717997	0.552889	1.29863	0.194072	0.977446	NOG	723	217	OU	zinc finger	No
COG5083	0.654937	0.940729	0.763488	1.23215	0.217894	0.977446	NOG	974	245	S	phosphatidylinositol transfer protein	No
COG5092	0.2612	0.361265	0.600382	0.601726	0.547357	0.977446	NOG	336	236	I	Adds a myristoyl group to the N-terminal glycine residue of certain cellular proteins (By similarity)	No
COG5096	4.21002	0.407749	0.529505	0.770057	0.441266	0.977446	NOG	1221	238	U	The coatomer is a cytosolic protein complex that binds to dilysine motifs and reversibly associates with Golgi non- clathrin-coated vesicles, which further mediate biosynthetic protein transport from the ER, via the Golgi up to the trans Golgi network. Coatomer complex is required for budding from Golgi membranes, and is essential for the retrograde Golgi-to-ER transport of dilysine-tagged protei…	No
COG5099	1.03845	0.663423	0.725637	0.914263	0.360579	0.977446	NOG	1071	235	J	pumilio homolog	No
COG5101	1.56458	0.292953	0.615339	0.476084	0.634015	0.977446	NOG	659	237	U	exportin	No
COG5102	0.906475	1.36038	0.763625	1.78148	0.0748338	0.977446	NOG	456	217	U	SFT2 domain containing	No
COG5103	1.06544	-0.295181	0.708728	-0.416494	0.677049	0.982338	NOG	331	236	K	Ccr4-NOT transcription complex, subunit	No
COG5110	1.8016	0.345809	0.666926	0.518513	0.604101	0.977446	NOG	298	238	O	26s proteasome regulatory subunit	No
COG5113	0.328363	0.603215	0.676212	0.89205	0.372366	0.977446	NOG	416	229	O	Ubiquitin conjugation factor E4	No
COG5116	0.890028	0.955723	0.745137	1.28261	0.199627	0.977446	NOG	322	235	O	26s proteasome	No
COG5126	32.3253	0.0521992	0.418778	0.124647	0.900803	0.987824	NOG	7833	247	DTZ	Calcium-binding protein	No
COG5127	0.586836	0.300474	0.755886	0.397513	0.690989	0.983188	NOG	332	236	C	ATP hydrolysis coupled proton transport	No
COG5139	0.511046	0.533805	0.763596	0.699068	0.48451	0.977446	NOG	246	223	S	IWS1 homolog (S. cerevisiae)	No
COG5141	0.914221	0.311244	0.749875	0.415062	0.678097	0.982338	NOG	1188	227	S	phd finger	No
COG5143	4.03839	-0.56621	0.483555	-1.17093	0.241627	0.977446	NOG	1626	238	U	Vesicle-associated membrane protein	No
COG5147	3.37852	0.440717	0.706979	0.623381	0.533034	0.977446	NOG	5168	238	K	Myblike DNAbinding domain containing protein	No
COG5158	1.53128	0.422188	0.712696	0.592382	0.553595	0.977446	NOG	1372	237	U	Vacuolar Protein	No
COG5159	2.25323	-0.248564	0.613504	-0.405154	0.685364	0.983188	NOG	532	237	O	cop9 signalosome complex subunit	No
COG5160	0.420052	0.180041	0.734381	0.245161	0.806332	0.98576	NOG	1054	230	O	SUMO1 sentrin specific peptidase	No
COG5164	0.551432	0.876936	0.763389	1.14874	0.250663	0.977446	NOG	289	231	K	Transcription elongation factor	No
COG5169	2.43093	0.316733	0.656573	0.482403	0.62952	0.977446	NOG	1383	209	K	Transcription factor	No
COG5170	2.0254	0.79516	0.631017	1.26013	0.207624	0.977446	NOG	490	219	T	protein phosphatase type 2A regulator activity	No
COG5171	2.9257	0.415184	0.53282	0.77922	0.43585	0.977446	NOG	498	237	U	ran binding protein	No
COG5176	1.82949	0.428881	0.651324	0.658476	0.510232	0.977446	NOG	825	234	A	mRNA processing	No
COG5178	3.36883	-0.463522	0.574362	-0.807021	0.419655	0.977446	NOG	330	236	A	PRP8 pre-mRNA processing factor 8 homolog (S. cerevisiae)	No
COG5179	0.491966	0.385498	0.745608	0.517024	0.605139	0.977446	NOG	260	208	K	transcription initiation factor tfiid subunit	No
COG5181	1.06717	-0.043059	0.725244	-0.0593717	0.952656	0.99866	NOG	290	236	A	Splicing factor 3b subunit	No
COG5183	0.646234	0.207563	0.7642	0.271609	0.785923	0.98576	NOG	1417	211	O	(Membrane-Associated Ring finger (C3HC4))	No
COG5184	3.66537	0.165112	0.70964	0.23267	0.816017	0.98576	NOG	3136	412	DZ	regulator of chromosome condensation	No
COG5186	0.868852	0.687184	0.741653	0.926558	0.354156	0.977446	NOG	511	237	A	polyA polymerase	No
COG5187	1.35907	0.550864	0.679842	0.810282	0.417778	0.977446	NOG	272	237	O	Proteasome (Prosome, macropain) 26S subunit, non-ATPase, 6	No
COG5190	2.58263	1.02843	0.621026	1.65603	0.0977167	0.977446	NOG	1973	238	K	CTD (Carboxy-terminal domain, RNA polymerase II, polypeptide A)	No
COG5196	0.678356	0.230384	0.732451	0.314538	0.753112	0.983188	NOG	563	236	U	Required for the retention of luminal endoplasmic reticulum proteins. Determines the specificity of the luminal ER protein retention system. Also required for normal vesicular traffic through the Golgi (By similarity)	No
COG5201	3.88559	0.0156854	0.483955	0.0324109	0.974144	0.99866	NOG	847	227	O	ubiquitin-dependent protein catabolic process	No
COG5207	0.259712	0.119848	0.669857	0.178916	0.858003	0.98576	NOG	331	234	O	ubiquitin carboxyl-terminal hydrolase	No
COG5209	1.33243	0.438308	0.655663	0.668495	0.503818	0.977446	NOG	322	233	S	cell differentiation protein Rcd1	No
COG5210	2.29137	1.19971	0.654255	1.83371	0.0666978	0.977446	NOG	3241	238	S	TBC1 domain family member	No
COG5215	1.04116	0.095585	0.717888	0.133148	0.894077	0.987824	NOG	334	234	U	Importin	No
COG5219	0.462755	-0.0135719	0.749664	-0.018104	0.985556	0.99866	NOG	247	222	O	listerin E3 ubiquitin protein ligase 1	No
COG5231	0.854365	0.692073	0.748458	0.924665	0.35514	0.977446	NOG	279	235	C	subunit (H	No
COG5236	0.476761	0.681524	0.762791	0.893462	0.37161	0.977446	NOG	319	226	S	zinc finger protein	No
COG5239	0.953211	0.662436	0.721987	0.917518	0.358871	0.977446	NOG	816	228	A	Ccr4-NOT transcription complex, subunit	No
COG5240	1.49998	0.527986	0.651827	0.810009	0.417935	0.977446	NOG	352	235	U	The coatomer is a cytosolic protein complex that binds to dilysine motifs and reversibly associates with Golgi non- clathrin-coated vesicles, which further mediate biosynthetic protein transport from the ER, via the Golgi up to the trans Golgi network. Coatomer complex is required for budding from Golgi membranes, and is essential for the retrograde Golgi-to-ER transport of dilysine-tagged protei…	No
COG5245	4.31271	0.712885	0.64992	1.09688	0.272693	0.977446	NOG	2562	215	Z	heavy chain	No
COG5248	0.609012	0.628636	0.750914	0.837161	0.402502	0.977446	NOG	216	197	K	TAF13 RNA polymerase II, TATA box binding protein (TBP)-associated factor	No
COG5253	5.95865	0.1649	0.623301	0.26456	0.791349	0.98576	NOG	1467	239	T	phosphatidylinositol-4-phosphate 5-kinase	No
COG5256	195.524	-0.28829	0.422932	-0.681646	0.495463	0.977446	NOG	1552	353	J	This protein promotes the GTP-dependent binding of aminoacyl-tRNA to the A-site of ribosomes during protein biosynthesis (By similarity)	No
COG5257	2.23158	-0.160281	0.513147	-0.312348	0.754776	0.983188	NOG	418	350	J	translation initiation factor	No
COG5258	1.0842	0.167175	0.755997	0.221131	0.82499	0.98576	NOG	422	218	S	GTP binding protein	No
COG5260	1.25331	0.336038	0.760777	0.441703	0.658704	0.977446	NOG	1321	239	L	domain) containing	No
COG5262	18.5359	0.167708	0.470359	0.356554	0.721426	0.983188	NOG	2463	238	B	histone h2a	No
COG5265	1.59962	1.06983	0.714112	1.49812	0.134102	0.977446	NOG	960	569	V	iron ion homeostasis	No
COG5269	0.951468	0.209743	0.721958	0.29052	0.771418	0.98576	NOG	896	229	K	Transcription factor	No
COG5272	59.4521	-0.00240026	0.327299	-0.00733355	0.994149	0.998918	NOG	2822	245	O	ubiquitin	No
COG5273	3.44483	0.92591	0.689439	1.34299	0.179275	0.977446	NOG	3527	238	S	Zinc finger, DHHC-type containing	No
COG5274	12.6729	0.0296858	0.483382	0.0614127	0.951031	0.99866	NOG	1542	245	CI	cytochrome b5	No
COG5277	79.7921	0.00599171	0.438837	0.0136536	0.989106	0.998918	NOG	3578	239	Z	Actin-related protein	No
COG5281	1.27071	-0.339835	0.667138	-0.509392	0.610477	0.977446	NOG	302	219	S	Tape measure protein	No
COG5297	2.23922	1.0347	0.746499	1.38607	0.165727	0.977446	NOG	326	148	G	Cellobiohydrolase	No
COG5307	1.96371	0.767819	0.602793	1.27377	0.202745	0.977446	NOG	1761	244	S	and Sec7 domain	No
COG5308	0.464992	1.36135	0.762751	1.78479	0.0742958	0.977446	NOG	266	218	U	nuclear pore complex protein	No
COG5309	7.34842	0.969812	0.655508	1.47948	0.139012	0.977446	NOG	504	159	G	cell wall	No
COG5325	0.636556	0.102695	0.761426	0.134872	0.892713	0.987824	NOG	765	236	U	SYNtaxin	No
COG5329	1.38894	-0.483034	0.704437	-0.685702	0.492901	0.977446	NOG	1190	238	T	Phosphatase	No
COG5333	0.774235	-0.139215	0.753052	-0.184868	0.853333	0.98576	NOG	1297	224	DKL	Component of the Mediator complex, a coactivator involved in regulated gene transcription of nearly all RNA polymerase II-dependent genes. Mediator functions as a bridge to convey information from gene-specific regulatory proteins to the basal RNA polymerase II transcription machinery. Mediator is recruited to promoters by direct interactions with regulatory proteins and serves as a scaffold for …	No
COG5347	1.82491	0.575947	0.65327	0.881637	0.377973	0.977446	NOG	2484	238	U	domain, ankyrin repeat and PH domain	No
COG5354	2.58622	0.090237	0.547278	0.164883	0.869036	0.98576	NOG	544	237	J	Component of the eukaryotic translation initiation factor 3 (eIF-3) complex, which is involved in protein synthesis and, together with other initiation factors, stimulates binding of mRNA and methionyl-tRNAi to the 40S ribosome (By similarity)	No
COG5391	2.66893	0.366	0.691642	0.529176	0.596684	0.977446	NOG	1303	218	U	sorting nexin	No
COG5407	0.937901	1.10014	0.732661	1.50157	0.133208	0.977446	NOG	263	231	U	translocation protein SEC63	No
COG5408	0.91364	-0.107249	0.755372	-0.141982	0.887094	0.985959	NOG	149	79	T	Phosphate transporter	No
COG5411	0.876812	0.626251	0.732277	0.855211	0.392434	0.977446	NOG	1544	232	T	inositol	No
COG5434	0.798358	0.667158	0.757048	0.881263	0.378175	0.977446	NOG	1781	310	M	Glycoside hydrolase family 28	No
COG5491	1.66232	0.443438	0.672105	0.659774	0.509399	0.977446	NOG	920	255	N	Charged multivesicular body protein	No
COG5498	2.12854	0.623134	0.695427	0.896045	0.370229	0.977446	NOG	410	187	M	Hydrolase	No
COG5520	2.68114	0.619309	0.746905	0.829168	0.407009	0.977446	NOG	621	315	G	glucosylceramidase activity	No
COG5524	1.29099	0.811573	0.759908	1.06799	0.285526	0.977446	NOG	187	94	S	rhodopsin	No
COG5541	0.736727	0.405965	0.733501	0.553462	0.579947	0.977446	NOG	324	227	U	vesicle-mediated transport	No
COG5560	0.926517	0.959385	0.755098	1.27054	0.203891	0.977446	NOG	1209	231	O	ubiquitin carboxyl-terminal hydrolase	No
COG5594	3.32377	0.486709	0.720312	0.675691	0.499237	0.977446	NOG	967	210	S	transmembrane protein 63C	No
COG5596	0.662345	0.115374	0.733942	0.157198	0.875089	0.98576	NOG	886	223	O	mitochondrial import inner membrane translocase, subunit	No
COG5599	0.823495	1.10236	0.759725	1.45099	0.146782	0.977446	NOG	3796	219	T	protein tyrosine phosphatase	No
COG5636	0.916377	0.898351	0.763137	1.17718	0.239123	0.977446	NOG	257	229	S	Component of the cytosolic iron-sulfur (Fe S) protein assembly machinery. Required for the maturation of extramitochondrial Fe S proteins (By similarity). Has anti- apoptotic effects in the cell. Involved in negative control of H(2)O(2)-induced cell death, probably by tethering the pro- apoptotic factor tah18 in the cytoplasm in the absence of oxidative stress (By similarity)	No
COG5640	5.1468	0.0405242	0.744777	0.0544111	0.956608	0.99866	NOG	10517	239	O	protease	No
COG5647	1.62245	0.399684	0.644631	0.62002	0.535245	0.977446	NOG	1353	237	O	cullin 1	No
COG5648	4.6559	1.11019	0.551021	2.0148	0.0439261	0.977446	NOG	1566	233	B	high mobility group	No
COG5656	0.956633	0.811587	0.762815	1.06394	0.287358	0.977446	NOG	376	219	O	Importin	No
COG5657	0.786437	1.06381	0.749438	1.41948	0.155759	0.977446	NOG	699	235	O	Importin	No
ENOG410XNMH	16.8755	-0.165362	0.548239	-0.301624	0.762939	0.98576	NOG	36429	1663	T	Histidine kinase	No
ENOG410XNMK	0.489625	0.252595	0.747358	0.337984	0.735375	0.983188	NOG	260	188	S	alpha-N-acetylglucosaminidase	No
ENOG410XNMS	0.66268	0.228959	0.723811	0.316325	0.751756	0.983188	NOG	437	123	S	ankyrin repeat domain	No
ENOG410XNMY	2.04598	-0.226984	0.596809	-0.38033	0.703701	0.983188	NOG	491	254	I	Dehydrogenase	No
ENOG410XNNC	5.75666	0.514322	0.524027	0.98148	0.326356	0.977446	NOG	1006	221	P	ATPase, Ca transporting, plasma membrane	No
ENOG410XNNW	0.743703	-0.0886025	0.759881	-0.116601	0.907177	0.988711	NOG	763	571	S	Dehydrogenase	No
ENOG410XNNY	0.814008	0.673122	0.738823	0.911075	0.362256	0.977446	NOG	413	235	S	coatomer protein complex, subunit beta 2 (beta prime)	No
ENOG410XNP1	2.14272	0.375493	0.65737	0.571206	0.56786	0.977446	NOG	347	244	I	Dehydrogenase	No
ENOG410XNP8	0.961221	-0.537122	0.749938	-0.716222	0.473854	0.977446	NOG	536	233	S	U4 u6 small nuclear ribonucleoprotein	No
ENOG410XNPH	12.1468	0.691601	0.524694	1.3181	0.187469	0.977446	NOG	3313	237	T	protein serine/threonine kinase activity	No
ENOG410XNPP	2.48823	-1.00232	0.580342	-1.72711	0.0841474	0.977446	NOG	508	237	T	Casein Kinase	No
ENOG410XNQ0	1.08939	0.610677	0.70693	0.863845	0.387673	0.977446	NOG	1704	217	T	CAMK family protein kinase	No
ENOG410XNQC	1.08405	0.0380088	0.737601	0.0515304	0.958903	0.99866	NOG	1329	231	S	beige BEACH domain containing protein	No
ENOG410XNQK	38.8589	-0.00552845	0.49425	-0.0111855	0.991075	0.998918	NOG	9465	680	G	Transporter	No
ENOG410XNR8	1.32106	1.08834	0.725053	1.50105	0.133342	0.977446	NOG	833	195	S	NIPA-like domain containing	No
ENOG410XNRB	0.645795	0.530622	0.76314	0.695314	0.486859	0.977446	NOG	736	237	T	serine threonine-protein kinase	No
ENOG410XNRM	0.853862	0.66655	0.752204	0.886129	0.375548	0.977446	NOG	265	181	S	solute carrier family 25 (aspartate glutamate carrier), member	No
ENOG410XNRS	16.4447	0.0120115	0.532302	0.0225652	0.981997	0.99866	NOG	360	231	S	GTP-binding nuclear protein	No
ENOG410XNRX	1.41328	0.428087	0.762872	0.561152	0.574694	0.977446	NOG	382	108	T	calcium calmodulin-dependent protein kinase	No
ENOG410XNS4	1.00177	0.670498	0.754814	0.888296	0.374382	0.977446	NOG	56	35	E	amino acid	No
ENOG410XNSX	0.482462	0.265671	0.764079	0.347701	0.728065	0.983188	NOG	418	218	U	beta receptor associated protein 1	No
ENOG410XNTI	3.08158	0.496433	0.594011	0.835731	0.403306	0.977446	NOG	675	236	L	purine NTP-dependent helicase activity	No
ENOG410XNTS	1.84747	0.466929	0.642321	0.72694	0.467263	0.977446	NOG	687	453	I	acyl-CoA dehydrogenase	No
ENOG410XNUK	0.427039	-0.185028	0.753644	-0.24551	0.806061	0.98576	NOG	314	190	S	ADP-ribosylation factor-like	No
ENOG410XNV7	5.0259	1.29885	0.586348	2.21515	0.0267495	0.977446	NOG	4004	225	O	aspartic	No
ENOG410XNVQ	3.03657	-0.110386	0.596825	-0.184955	0.853264	0.98576	NOG	1620	206	S	Guanine nucleotide binding protein (G protein) alpha	No
ENOG410XNW0	49.337	-0.183037	0.270258	-0.677267	0.498236	0.977446	NOG	678	229	U	transmembrane transport	No
ENOG410XNWX	0.651206	0.698763	0.736498	0.948765	0.34274	0.977446	NOG	278	201	S	protein 2 3 complex subunit	No
ENOG410XNXC	0.250038	0.478121	0.668456	0.715262	0.474447	0.977446	NOG	295	233	U	Vacuolar Protein	No
ENOG410XNXP	1.98116	0.273513	0.636608	0.429641	0.667457	0.980596	NOG	346	180	T	Casein Kinase	No
ENOG410XNY0	8.78592	-0.219563	0.434343	-0.505505	0.613204	0.977446	NOG	1877	238	T	Mitogen-activated protein kinase	No
ENOG410XNYK	0.71359	0.499722	0.763237	0.654741	0.512635	0.977446	NOG	61	52	S	Conserved hypothetical, protein	No
ENOG410XNZ9	4.09455	0.270573	0.64889	0.416978	0.676694	0.982338	NOG	922	216	S	carnitine	No
ENOG410XNZC	1.51515	-0.192493	0.739166	-0.260419	0.794541	0.98576	NOG	719	97	S	oligo-peptide transporter	No
ENOG410XNZV	2.17644	0.290684	0.556859	0.522007	0.601666	0.977446	NOG	616	230	S	member RAS oncogene family	No
ENOG410XNZY	3.48061	0.719043	0.575903	1.24855	0.21183	0.977446	NOG	1780	216	U	NADPH Oxidase	No
ENOG410XNZZ	0.439195	0.497209	0.76256	0.652026	0.514384	0.977446	NOG	403	167	S	methyltransferase like 13	No
ENOG410XP01	1.42871	0.0532011	0.715083	0.0743985	0.940693	0.99866	NOG	270	233	O	The proteasome is a multicatalytic proteinase complex which is characterized by its ability to cleave peptides with Arg, Phe, Tyr, Leu, and Glu adjacent to the leaving group at neutral or slightly basic pH. The proteasome has an ATP-dependent proteolytic activity (By similarity)	No
ENOG410XP04	1.14241	0.616957	0.69108	0.892744	0.371994	0.977446	NOG	901	213	S	Mannosidase alpha class	No
ENOG410XP06	0.897476	0.574267	0.764016	0.751643	0.452266	0.977446	NOG	464	213	S	Phosphatidylinositol 4-kinase type	No
ENOG410XP07	0.820803	1.13768	0.757561	1.50176	0.133158	0.977446	NOG	1264	186	J	eukaryotic translation initiation factor 2c	No
ENOG410XP0A	0.843443	1.09118	0.759344	1.437	0.150718	0.977446	NOG	323	196	L	chromatin modification	No
ENOG410XP0B	0.68484	0.878732	0.758399	1.15867	0.246592	0.977446	NOG	1578	226	O	Calpain-like cysteine peptidase	No
ENOG410XP18	0.349491	0.79515	0.686801	1.15776	0.246963	0.977446	NOG	673	180	S	Poly (ADP-ribose) polymerase	No
ENOG410XP1E	2.10773	0.666792	0.591953	1.12643	0.259985	0.977446	NOG	250	210	J	Component of the eukaryotic translation initiation factor 3 (eIF-3) complex, which is involved in protein synthesis and, together with other initiation factors, stimulates binding of mRNA and methionyl-tRNAi to the 40S ribosome (By similarity)	No
ENOG410XP1S	2.66347	0.352037	0.634948	0.554434	0.579282	0.977446	NOG	1419	222	S	solute carrier family 35 member	No
ENOG410XP1U	0.962595	-0.142034	0.757218	-0.187574	0.851211	0.98576	NOG	256	182	S	small GTPase mediated signal transduction	No
ENOG410XP20	1.47509	0.427542	0.679788	0.628934	0.529392	0.977446	NOG	417	199	S	RNA binding motif protein	No
ENOG410XP21	1.81717	0.224889	0.619245	0.363166	0.716481	0.983188	NOG	336	231	O	The proteasome is a multicatalytic proteinase complex which is characterized by its ability to cleave peptides with Arg, Phe, Tyr, Leu, and Glu adjacent to the leaving group at neutral or slightly basic pH. The proteasome has an ATP-dependent proteolytic activity (By similarity)	No
ENOG410XP3K	2.51262	0.834814	0.659708	1.26543	0.205717	0.977446	NOG	2445	394	S	Positively regulates the activity of the minus-end directed microtubule motor protein dynein. May enhance dynein- mediated microtubule sliding by targeting dynein to the microtubule plus end. Required for	No
ENOG410XP3S	0.904006	0.0142393	0.762434	0.0186761	0.985099	0.99866	NOG	211	94	O	pellino E3 ubiquitin protein ligase	No
ENOG410XP4K	1.79515	-0.713361	0.680012	-1.04904	0.294159	0.977446	NOG	845	193	T	p21 protein (Cdc42 Rac)-activated kinase	No
ENOG410XP4Z	1.03049	0.469598	0.723532	0.649036	0.516315	0.977446	NOG	756	230	L	excision repair cross-complementing rodent repair deficiency complementation group	No
ENOG410XP67	1.62459	0.788062	0.746161	1.05616	0.290897	0.977446	NOG	564	220	I	)-reductase	No
ENOG410XP69	1.16742	1.16729	0.695502	1.67835	0.0932794	0.977446	NOG	229	191	O	Specifically deglycosylates the denatured form of N- linked glycoproteins in the cytoplasm and assists their proteasome-mediated degradation. Cleaves the beta-aspartyl- glucosamine (GlcNAc) of the glycan and the amide side chain of Asn, converting Asn to Asp. Prefers proteins containing high- mannose over those bearing complex type oligosaccharides. Can recognize misfolded proteins in the endopla…	No
ENOG410XP7I	0.98469	-0.420751	0.763455	-0.551115	0.581555	0.977446	NOG	2581	654	G	Transporter	No
ENOG410XP7J	0.585344	0.0937732	0.760247	0.123346	0.901833	0.987824	NOG	257	190	O	Proteasome (Prosome, macropain) activator subunit 4	No
ENOG410XP7T	2.3682	4.74575e-05	0.625922	7.58201e-05	0.99994	1	NOG	315	199	U	Calnexin	No
ENOG410XP7X	1.43229	0.426994	0.710572	0.600916	0.547896	0.977446	NOG	711	223	U	Endoplasmic reticulumgolgi intermediate compartment protein	No
ENOG410XP92	0.670975	0.497355	0.763726	0.651222	0.514903	0.977446	NOG	355	220	S	splicing factor (U2AF)	No
ENOG410XP96	0.750239	0.403645	0.760179	0.530987	0.595428	0.977446	NOG	345	230	O	ubiquitin thiolesterase activity	No
ENOG410XP9E	0.727063	0.528803	0.752527	0.702703	0.482241	0.977446	NOG	945	220	S	Oxysterol-binding protein	No
ENOG410XP9G	0.821826	1.47062	0.763603	1.9259	0.0541168	0.977446	NOG	1141	232	T	mitogen-activated protein kinase kinase kinase kinase	No
ENOG410XPAQ	3.23941	0.782143	0.661735	1.18196	0.237222	0.977446	NOG	48	48	S	C2H2 finger domain protein	No
ENOG410XPAX	0.396789	0.456327	0.755684	0.60386	0.545937	0.977446	NOG	269	203	T	PRP4 pre-mRNA processing factor 4 homolog B (yeast)	No
ENOG410XPB2	0.308329	0.372169	0.750866	0.495653	0.620139	0.977446	NOG	200	173	S	HID1 domain containing	No
ENOG410XPC8	3.14427	0.372794	0.707458	0.526949	0.598229	0.977446	NOG	977	117	S	copine family	No
ENOG410XPCC	1.04373	0.491799	0.748674	0.656893	0.511249	0.977446	NOG	476	219	S	ran binding protein	No
ENOG410XPCJ	0.490704	0.518088	0.761544	0.680312	0.496307	0.977446	NOG	239	204	S	trafficking protein particle complex	No
ENOG410XPCR	0.587228	0.491991	0.759832	0.6475	0.517308	0.977446	NOG	241	221	S	ER membrane protein complex subunit 1	No
ENOG410XPET	1.37717	0.384995	0.650871	0.591507	0.554181	0.977446	NOG	1250	237	T	dual-specificity tyrosine-(Y)-phosphorylation regulated kinase	No
ENOG410XPFS	1.4691	1.08013	0.615539	1.75477	0.0792993	0.977446	NOG	846	238	U	Adaptor-related protein complex	No
ENOG410XPG9	0.680659	0.186136	0.762213	0.244204	0.807073	0.98576	NOG	269	237	O	26S proteasome non-ATPase regulatory subunit	No
ENOG410XPGP	9.86419	0.259123	0.382328	0.677751	0.497929	0.977446	NOG	2214	238	T	Casein Kinase	No
ENOG410XPGU	0.454921	0.645478	0.762662	0.846349	0.397358	0.977446	NOG	233	217	S	Macrophage erythroblast attacher	No
ENOG410XPH1	2.26977	0.353488	0.603708	0.585528	0.558193	0.977446	NOG	460	232	U	clathrin heavy chain	No
ENOG410XPH3	1.0325	0.7642	0.730783	1.04573	0.295687	0.977446	NOG	318	207	I	phosphatidylinositol 4-kinase	No
ENOG410XPH7	1.21637	-0.442135	0.680458	-0.649762	0.515846	0.977446	NOG	174	106	S	metallo-protease	No
ENOG410XPHY	1.52018	0.496203	0.729071	0.680596	0.496127	0.977446	NOG	159	140	S	growth hormone inducible transmembrane protein	No
ENOG410XPJT	1.97639	0.413784	0.551791	0.749891	0.45332	0.977446	NOG	236	205	J	Component of the eukaryotic translation initiation factor 3 (eIF-3) complex, which is involved in protein synthesis and, together with other initiation factors, stimulates binding of mRNA and methionyl-tRNAi to the 40S ribosome (By similarity)	No
ENOG410XPK2	0.316386	0.421407	0.680915	0.618883	0.535993	0.977446	NOG	331	228	U	Transportin	No
ENOG410XPK4	0.748062	0.668148	0.737722	0.905691	0.3651	0.977446	NOG	290	198	O	cullin-associated and neddylation-dissociated	No
ENOG410XPN7	1.4024	1.11695	0.755999	1.47745	0.139556	0.977446	NOG	391	136	O	katanin p60	No
ENOG410XPP3	1.40836	0.519315	0.661734	0.784778	0.432584	0.977446	NOG	1677	239	T	Cyclin-Dependent Kinase	No
ENOG410XPQ0	0.744739	0.461779	0.757303	0.609768	0.542016	0.977446	NOG	450	215	O	Cysteine peptidase	No
ENOG410XPQ6	1.07875	0.847699	0.75435	1.12375	0.26112	0.977446	NOG	339	235	U	attachment protein	No
ENOG410XPQ8	2.20315	0.812831	0.607431	1.33814	0.180849	0.977446	NOG	315	234	O	The proteasome is a multicatalytic proteinase complex which is characterized by its ability to cleave peptides with Arg, Phe, Tyr, Leu, and Glu adjacent to the leaving group at neutral or slightly basic pH. The proteasome has an ATP-dependent proteolytic activity (By similarity)	No
ENOG410XPQQ	0.818046	0.150189	0.758617	0.197977	0.843063	0.98576	NOG	875	218	T	CAMP-dependent protein kinase, catalytic subunit	No
ENOG410XPQU	1.10145	1.30181	0.742643	1.75294	0.0796118	0.977446	NOG	325	206	O	ubiquitin protein ligase E3 component (N-recognin)	No
ENOG410XPQV	0.414884	0.371017	0.764152	0.485527	0.627302	0.977446	NOG	270	229	A	PRP19 PSO4 pre-mRNA processing factor 19 homolog (S. cerevisiae)	No
ENOG410XPSE	0.992201	0.59562	0.763919	0.77969	0.435573	0.977446	NOG	1908	129	U	Potassium voltage-gated channel, subfamily H (Eag-related), member	No
ENOG410XPST	9.4188	-0.155675	0.51275	-0.303607	0.761427	0.98576	NOG	547	229	S	Phosphate carrier protein	No
ENOG410XPSW	0.843277	0.680929	0.762587	0.89292	0.3719	0.977446	NOG	1322	222	S	phospholipase c	No
ENOG410XPT2	1.05444	-0.0729086	0.763527	-0.0954892	0.923926	0.993018	NOG	419	95	S	Dysferlin, limb girdle muscular dystrophy 2B (Autosomal recessive)	No
ENOG410XPTR	0.801441	0.573005	0.682926	0.839044	0.401445	0.977446	NOG	531	203	U	solute carrier family 45 member	No
ENOG410XPTU	1.61176	0.940865	0.696782	1.3503	0.176919	0.977446	NOG	985	219	S	Myotubularin related protein	No
ENOG410XPU1	0.746988	0.764068	0.762033	1.00267	0.31602	0.977446	NOG	458	174	S	GTPase Activating protein	No
ENOG410XPUI	1.56575	0.36806	0.590357	0.623453	0.532987	0.977446	NOG	1275	221	S	member RAS oncogene family	No
ENOG410XPUM	0.561088	0.00310267	0.748721	0.00414396	0.996694	0.999646	NOG	332	224	S	Dmx-like 1	No
ENOG410XPUN	12.2243	0.585217	0.763252	0.766741	0.443235	0.977446	NOG	1216	176	S	annexin A7	No
ENOG410XPV4	0.408993	0.422542	0.755619	0.559199	0.576026	0.977446	NOG	440	212	U	nuclear pore complex protein	No
ENOG410XPVF	3.40616	-0.303184	0.490388	-0.618253	0.536409	0.977446	NOG	367	199	T	serine threonine-protein phosphatase	No
ENOG410XPVR	0.548898	0.209485	0.756977	0.276739	0.78198	0.98576	NOG	230	183	A	PRP39 pre-mRNA processing factor 39 homolog (S. cerevisiae)	No
ENOG410XPXR	1.82975	-0.16457	0.5949	-0.276635	0.78206	0.98576	NOG	305	236	O	t-complex protein 1	No
ENOG410XPYE	0.897553	0.562899	0.714166	0.788191	0.430585	0.977446	NOG	444	202	S	Anoctamin	No
ENOG410XPYK	2.6786	0.254754	0.503397	0.506071	0.612807	0.977446	NOG	858	229	U	Phospholipid-transporting atpase	No
ENOG410XPZD	0.831867	0.24615	0.751883	0.327378	0.743382	0.983188	NOG	241	134	U	presenilin	No
ENOG410XPZI	0.338685	-0.0533744	0.751743	-0.0710009	0.943397	0.99866	NOG	439	236	S	Small nuclear ribonucleoprotein	No
ENOG410XPZS	1.85189	0.519974	0.664511	0.78249	0.433927	0.977446	NOG	323	235	S	Coatomer protein complex subunit alpha	No
ENOG410XQ0D	1.54079	0.582373	0.7499	0.7766	0.437395	0.977446	NOG	603	191	T	Serine Threonine protein kinase	No
ENOG410XQ1D	0.371389	0.654678	0.752683	0.869792	0.384414	0.977446	NOG	369	233	U	Component of the coat protein complex II (COPII) which promotes the formation of transport vesicles from the endoplasmic reticulum (ER). The coat has two main functions, the physical deformation of the endoplasmic reticulum membrane into vesicles and the selection of cargo molecules	No
ENOG410XQ37	0.730262	0.953892	0.740499	1.28817	0.197685	0.977446	NOG	253	221	J	Component of the eukaryotic translation initiation factor 3 (eIF-3) complex, which is involved in protein synthesis and, together with other initiation factors, stimulates binding of mRNA and methionyl-tRNAi to the 40S ribosome (By similarity)	No
ENOG410XQ3E	1.44093	0.981381	0.712454	1.37747	0.168368	0.977446	NOG	268	233	J	Component of the eukaryotic translation initiation factor 3 (eIF-3) complex, which is involved in protein synthesis and, together with other initiation factors, stimulates binding of mRNA and methionyl-tRNAi to the 40S ribosome (By similarity)	No
ENOG410XQ3G	0.293256	0.257219	0.668645	0.384687	0.700469	0.983188	NOG	202	103	Z	Hook homolog	No
ENOG410XQ3Q	1.14121	-0.707991	0.661342	-1.07054	0.284377	0.977446	NOG	334	233	O	t-complex protein 1 subunit	No
ENOG410XQ54	1.44292	1.44254	0.73576	1.96061	0.0499249	0.977446	NOG	2019	219	S	F-box and leucine-rich repeat protein	No
ENOG410XQ5A	1.26966	-0.439571	0.673362	-0.6528	0.513885	0.977446	NOG	874	224	T	mitogen-activated protein kinase kinase	No
ENOG410XQ5B	0.858641	0.657135	0.757252	0.867789	0.38551	0.977446	NOG	389	228	S	Tubulin, gamma complex associated protein	No
ENOG410XQ81	0.623217	1.15461	0.761495	1.51624	0.129458	0.977446	NOG	551	214	O	ubiquitin carboxyl-terminal hydrolase	No
ENOG410XQ8U	1.05399	0.785452	0.729378	1.07688	0.281535	0.977446	NOG	351	196	S	TIA1 cytotoxic granule-associated RNA binding	No
ENOG410XQ8V	12.2294	0.464407	0.608283	0.763471	0.445182	0.977446	NOG	551	115	S	synthase	No
ENOG410XQAD	1.02617	0.481197	0.721635	0.666814	0.504891	0.977446	NOG	522	204	S	Coronin, actin binding protein	No
ENOG410XQAJ	1.51429	0.857926	0.69267	1.23858	0.215502	0.977446	NOG	412	232	U	Importin	No
ENOG410XQAP	0.507134	0.466639	0.760456	0.613631	0.539459	0.977446	NOG	121	105	G	Hydrolase	No
ENOG410XQBB	0.530466	0.921027	0.745571	1.23533	0.216707	0.977446	NOG	34	34	G	hydrolase family 5 protein	No
ENOG410XQCQ	0.242241	0.305075	0.589126	0.517844	0.604567	0.977446	NOG	274	115	S	EF-hand domain (C-terminal) containing	No
ENOG410XQDD	0.940744	0.351675	0.760911	0.462176	0.643955	0.977446	NOG	342	118	S	Phosphodiesterase	No
ENOG410XQFT	0.630829	0.0257673	0.756365	0.0340673	0.972823	0.99866	NOG	595	135	S	tubby like protein	No
ENOG410XQGN	0.747722	0.267658	0.764174	0.350258	0.726145	0.983188	NOG	44	44	S	Conserved hypothetical, protein	No
ENOG410XQGS	1.10334	0.486326	0.754911	0.644216	0.519435	0.977446	NOG	1971	231	T	mitogen-activated protein kinase kinase kinase	No
ENOG410XQGZ	16.2031	0.120431	0.301408	0.399563	0.689479	0.983188	NOG	404	236	S	guanine nucleotidebinding protein	No
ENOG410XQIG	1.08386	0.00599941	0.73979	0.00810962	0.99353	0.998918	NOG	235	204	I	glutamate-cysteine ligase activity	No
ENOG410XQJW	1.88003	0.405272	0.572684	0.707672	0.479149	0.977446	NOG	800	220	T	Protein phosphatase 2, regulatory subunit B	No
ENOG410XQK5	0.977955	0.129492	0.687087	0.188465	0.850512	0.98576	NOG	263	209	J	Component of the eukaryotic translation initiation factor 3 (eIF-3) complex, which is involved in protein synthesis and, together with other initiation factors, stimulates binding of mRNA and methionyl-tRNAi to the 40S ribosome (By similarity)	No
ENOG410XQKJ	0.338511	0.673901	0.690334	0.976195	0.328968	0.977446	NOG	327	214	S	regulatory associated protein of MTOR	No
ENOG410XQMZ	0.427244	0.428645	0.679138	0.631161	0.527935	0.977446	NOG	595	126	G	Mannosidase alpha class	No
ENOG410XQN1	0.592014	0.670685	0.754173	0.889298	0.373843	0.977446	NOG	252	206	S	actin filament depolymerization	No
ENOG410XQN5	5.08065	0.73095	0.439942	1.66147	0.0966194	0.977446	NOG	1004	233	S	member RAS oncogene family	No
ENOG410XQN9	1.92613	-0.0942683	0.623333	-0.151233	0.879792	0.98576	NOG	509	227	S	nucleosome assembly	No
ENOG410XQRP	1.18027	-0.328998	0.711986	-0.462085	0.644021	0.977446	NOG	387	233	O	The proteasome is a multicatalytic proteinase complex which is characterized by its ability to cleave peptides with Arg, Phe, Tyr, Leu, and Glu adjacent to the leaving group at neutral or slightly basic pH. The proteasome has an ATP-dependent proteolytic activity (By similarity)	No
ENOG410XQSD	0.194352	0.201967	0.579739	0.348375	0.727558	0.983188	NOG	233	183	U	cystinosin	No
ENOG410XQUQ	0.721741	0.33732	0.764039	0.441496	0.658854	0.977446	NOG	394	205	S	Involved in proper cytoplasmic distribution of mitochondria (By similarity)	No
ENOG410XQUX	1.9191	-0.84947	0.615272	-1.38064	0.167389	0.977446	NOG	434	202	S	guanine nucleotide binding protein (G protein), beta	No
ENOG410XQVI	1.23109	0.481922	0.760956	0.633312	0.52653	0.977446	NOG	526	235	T	(Regulatory) subunit	No
ENOG410XQVU	0.381294	-0.111259	0.762639	-0.145886	0.884011	0.98576	NOG	489	217	S	nudC domain containing	No
ENOG410XQVX	0.530648	0.401824	0.73428	0.547236	0.584216	0.977446	NOG	247	117	O	proteasome (prosome, macropain) activator subunit	No
ENOG410XQVZ	0.374386	0.236958	0.725751	0.3265	0.744046	0.983188	NOG	252	213	S	ribophorin I	No
ENOG410XQWV	0.227994	0.397525	0.588332	0.675681	0.499243	0.977446	NOG	952	116	S	multiple EGF-like-domains	No
ENOG410XQX6	0.394071	0.288639	0.763041	0.378275	0.705226	0.983188	NOG	561	214	S	Rhophilin, Rho GTPase binding protein	No
ENOG410XQYD	0.692443	1.21738	0.763256	1.59499	0.110716	0.977446	NOG	236	211	O	capping protein	No
ENOG410XQYH	1.59176	-0.119372	0.6616	-0.180429	0.856815	0.98576	NOG	798	263	S	Protein arginine n-methyltransferase	No
ENOG410XQYU	0.635467	0.676091	0.747998	0.903867	0.366066	0.977446	NOG	47	46	S	C2H2 finger domain protein	No
ENOG410XQZZ	0.456371	0.830243	0.695991	1.19289	0.232912	0.977446	NOG	189	123	S	programmed cell death 4 (Neoplastic transformation inhibitor)	No
ENOG410XR0A	1.56823	0.284311	0.750219	0.37897	0.70471	0.983188	NOG	636	155	S	capping protein (actin filament) gelsolin-like	No
ENOG410XR1F	0.511975	-0.0522997	0.756363	-0.0691463	0.944873	0.99866	NOG	297	200	U	tumor suppressor candidate 3	No
ENOG410XR4Q	0.746405	0.573353	0.762556	0.751883	0.452122	0.977446	NOG	112	78	U	DUF907 domain protein	No
ENOG410XR54	1.1259	0.673132	0.737996	0.912108	0.361712	0.977446	NOG	480	206	U	Niemann-Pick disease type C1	No
ENOG410XR5K	1.13015	-0.0872992	0.699748	-0.124758	0.900715	0.987824	NOG	437	166	Z	Tropomyosin	No
ENOG410XR5X	3.99996	-0.12218	0.54578	-0.223864	0.822863	0.98576	NOG	876	238	S	poly(A) binding protein, cytoplasmic	No
ENOG410XR6Z	0.981791	0.649608	0.763784	0.850513	0.39504	0.977446	NOG	820	128	S	Guanylate binding protein	No
ENOG410XR72	0.931715	1.32549	0.761769	1.74002	0.0818553	0.977446	NOG	554	135	I	phospholipase A2 group	No
ENOG410XR7X	1.57153	0.0922179	0.644327	0.143123	0.886193	0.98576	NOG	304	238	O	The proteasome is a multicatalytic proteinase complex which is characterized by its ability to cleave peptides with Arg, Phe, Tyr, Leu, and Glu adjacent to the leaving group at neutral or slightly basic pH. The proteasome has an ATP-dependent proteolytic activity (By similarity)	No
ENOG410XRAR	0.450717	0.114842	0.72831	0.157683	0.874707	0.98576	NOG	285	202	U	Autophagy related	No
ENOG410XRBH	1.01654	0.59121	0.715154	0.826689	0.408413	0.977446	NOG	1062	234	T	SRSF protein kinase	No
ENOG410XRBK	0.441658	0.289427	0.721979	0.400881	0.688508	0.983188	NOG	422	146	T	Protein phosphatase 2, regulatory subunit B	No
ENOG410XRCA	0.989386	0.776966	0.757774	1.02533	0.305209	0.977446	NOG	556	206	U	ATPase (type	No
ENOG410XRFI	0.699033	0.395397	0.762336	0.518665	0.603994	0.977446	NOG	397	161	S	triglyceride lipase activity	No
ENOG410XRH2	0.961403	0.575253	0.711959	0.807985	0.419099	0.977446	NOG	285	235	U	The coatomer is a cytosolic protein complex that binds to dilysine motifs and reversibly associates with Golgi non- clathrin-coated vesicles, which further mediate biosynthetic protein transport from the ER, via the Golgi up to the trans Golgi network. Coatomer complex is required for budding from Golgi membranes, and is essential for the retrograde Golgi-to-ER transport of dilysine-tagged protei…	No
ENOG410XRHN	1.64956	0.628388	0.753925	0.833489	0.404569	0.977446	NOG	394	233	O	endosome to lysosome transport via multivesicular body sorting pathway	No
ENOG410XRI2	1.29914	0.559976	0.7633	0.733625	0.463178	0.977446	NOG	174	127	O	DnaJ (Hsp40) homolog, subfamily C, member 13	No
ENOG410XRI7	1.20757	1.06008	0.761684	1.39176	0.163996	0.977446	NOG	1441	208	T	Phosphodiesterase	No
ENOG410XRKB	0.403953	0.57919	0.694583	0.833868	0.404356	0.977446	NOG	140	120	S	kiaa1033	No
ENOG410XRKJ	0.321361	-0.0965264	0.674725	-0.14306	0.886243	0.98576	NOG	51	51	S	Rossmann fold oxidoreductase	No
ENOG410XRM0	0.64209	0.57187	0.740371	0.77241	0.439872	0.977446	NOG	454	133	S	Ring finger protein	No
ENOG410XRM1	0.786466	0.648057	0.746322	0.868333	0.385212	0.977446	NOG	419	209	T	Protein phosphatase 6, regulatory subunit	No
ENOG410XRMJ	12.3398	0.352531	0.57294	0.615303	0.538355	0.977446	NOG	4380	243	T	calcium-dependent protein kinase	No
ENOG410XRN0	0.995328	0.587713	0.719817	0.816475	0.414229	0.977446	NOG	313	209	E	S-adenosylmethionine decarboxylase proenzyme	No
ENOG410XRQQ	0.742544	-0.175425	0.742469	-0.236272	0.813221	0.98576	NOG	470	190	S	GRAM domain containing	No
ENOG410XRSD	0.551206	0.659912	0.763993	0.863767	0.387716	0.977446	NOG	250	224	U	Vacuolar Protein	No
ENOG410XRSP	0.479811	-0.0580986	0.762699	-0.076175	0.93928	0.99866	NOG	382	225	S	Leucine zipper-ef-hand containing transmembrane protein	No
ENOG410XRSQ	1.65334	1.07768	0.720313	1.49613	0.134621	0.977446	NOG	2294	226	S	Transfer protein	No
ENOG410XRT8	1.46403	0.812607	0.75104	1.08198	0.279263	0.977446	NOG	369	227	T	3phosphoinositidedependent protein kinase	No
ENOG410XRU3	1.62843	0.382407	0.654545	0.584233	0.559063	0.977446	NOG	274	222	J	Component of the eukaryotic translation initiation factor 3 (eIF-3) complex, which is involved in protein synthesis and, together with other initiation factors, stimulates binding of mRNA and methionyl-tRNAi to the 40S ribosome (By similarity)	No
ENOG410XRU7	0.405374	0.159264	0.758618	0.209939	0.833715	0.98576	NOG	177	163	U	Peroxisomal membrane protein	No
ENOG410XRVA	0.821238	0.949783	0.758817	1.25166	0.210692	0.977446	NOG	46	43	S	LEA domain protein	No
ENOG410XRWA	0.657162	0.666506	0.76397	0.872425	0.382977	0.977446	NOG	134	111	S	Protein of unknown function (DUF1688)	No
ENOG410XRWH	2.23565	1.86473	0.756583	2.46467	0.013714	0.977446	NOG	212	133	K	proto-oncogene	No
ENOG410XRWT	2.33927	0.687864	0.604831	1.13728	0.25542	0.977446	NOG	1002	220	I	elongation of very long chain fatty acids protein	No
ENOG410XRWX	0.719361	0.463381	0.763996	0.606523	0.544167	0.977446	NOG	569	214	S	F-box and WD repeat domain containing 7, E3 ubiquitin protein ligase	No
ENOG410XRX6	0.616811	0.718006	0.746673	0.961607	0.336247	0.977446	NOG	224	202	S	vacuolar protein sorting 8 homolog (S. cerevisiae)	No
ENOG410XRXC	0.884339	0.542483	0.753177	0.720259	0.471365	0.977446	NOG	405	140	S	ELMO CED-12 domain containing	No
ENOG410XRXF	0.20127	0.214728	0.573395	0.374485	0.708043	0.983188	NOG	163	118	S	TBCC domain containing 1	No
ENOG410XS04	3.16894	0.320642	0.691881	0.463436	0.643052	0.977446	NOG	71	69	S	Transcription factor	No
ENOG410XS0P	2.67302	0.990437	0.679802	1.45695	0.14513	0.977446	NOG	782	217	S	Solute carrier family 44 member	No
ENOG410XS1H	0.40789	0.427997	0.732478	0.584313	0.559009	0.977446	NOG	574	176	S	RING finger) protein	No
ENOG410XS1Q	0.48754	1.39748	0.763425	1.83054	0.0671693	0.977446	NOG	355	209	S	Transmembrane protein 87A	No
ENOG410XS23	2.26157	-0.0633013	0.56905	-0.11124	0.911426	0.989804	NOG	349	231	O	The proteasome is a multicatalytic proteinase complex which is characterized by its ability to cleave peptides with Arg, Phe, Tyr, Leu, and Glu adjacent to the leaving group at neutral or slightly basic pH. The proteasome has an ATP-dependent proteolytic activity (By similarity)	No
ENOG410XS3C	0.398752	1.10676	0.747849	1.47993	0.138892	0.977446	NOG	53	40	S		No
ENOG410XS3S	0.702851	1.17346	0.763125	1.5377	0.124121	0.977446	NOG	178	127	G	hydrolase family 43	No
ENOG410XS40	0.962123	0.75227	0.681524	1.10381	0.269677	0.977446	NOG	276	235	O	26S proteasome nonATPase regulatory subunit	No
ENOG410XS4P	0.944908	0.964116	0.733748	1.31396	0.18886	0.977446	NOG	491	207	J	Eukaryotic translation initiation factor 4 gamma	No
ENOG410XS4S	1.2644	0.526346	0.762569	0.690228	0.490051	0.977446	NOG	601	99	U	Anoctamin	No
ENOG410XS5J	0.506916	0.644605	0.763969	0.843758	0.398805	0.977446	NOG	1101	256	S	prolyl 4-hydroxylase	No
ENOG410XS81	0.948626	0.303942	0.685548	0.443357	0.657508	0.977446	NOG	376	232	O	ubiquitin-conjugating enzyme	No
ENOG410XS86	1.07409	0.138492	0.713153	0.194197	0.846021	0.98576	NOG	790	215	S	Solute carrier family 25	No
ENOG410XS8D	0.868448	0.734499	0.7639	0.961512	0.336295	0.977446	NOG	78	74	S	PH domain protein	No
ENOG410XSBR	0.385782	0.199185	0.761316	0.261632	0.793605	0.98576	NOG	235	198	U	nuclear pore complex protein	No
ENOG410XSC8	1.82611	0.610426	0.660425	0.924292	0.355334	0.977446	NOG	287	231	O	The proteasome is a multicatalytic proteinase complex which is characterized by its ability to cleave peptides with Arg, Phe, Tyr, Leu, and Glu adjacent to the leaving group at neutral or slightly basic pH. The proteasome has an ATP-dependent proteolytic activity (By similarity)	No
ENOG410XSE0	0.643874	0.632685	0.763682	0.828467	0.407406	0.977446	NOG	796	203	G	Major Facilitator superfamily	No
ENOG410XSGG	0.482604	0.100764	0.759636	0.132647	0.894472	0.987824	NOG	528	181	O	protease, serine, 16 (thymus)	No
ENOG410XSHQ	1.42834	0.186884	0.7586	0.246353	0.805409	0.98576	NOG	109	71	S	1,3-beta-glucanosyltransferase gel2	No
ENOG410XSI5	1.26309	0.778411	0.757644	1.02741	0.304228	0.977446	NOG	311	117	O	surfactant protein B	No
ENOG410XSR9	1.27495	0.0739672	0.682531	0.108372	0.913701	0.989804	NOG	231	201	J	Component of the eukaryotic translation initiation factor 3 (eIF-3) complex, which is involved in protein synthesis and, together with other initiation factors, stimulates binding of mRNA and methionyl-tRNAi to the 40S ribosome (By similarity)	No
ENOG410XSSD	2.65518	-0.229433	0.761176	-0.30142	0.763095	0.98576	NOG	331	236	G	Transporter	No
ENOG410XSU6	0.686697	0.473176	0.704087	0.672041	0.501557	0.977446	NOG	87	61	S	Conserved hypothetical, protein	No
ENOG410XSZD	0.450138	0.247514	0.763905	0.324011	0.74593	0.983188	NOG	303	200	K	SWI SNF related matrix associated actin dependent regulator of chromatin subfamily B member 1	No
ENOG410XSZW	0.522791	0.461562	0.758269	0.608705	0.54272	0.977446	NOG	61	54	S	Putative TOS1-like glycosyl hydrolase (DUF2401)	No
ENOG410XSZZ	0.374983	0.338545	0.751296	0.450615	0.652267	0.977446	NOG	225	188	S	UBX domain protein	No
ENOG410XT40	0.390842	0.404256	0.74799	0.540457	0.588882	0.977446	NOG	203	178	S	Chromosome 16 open reading frame 70	No
ENOG410XTCJ	2.31587	0.123314	0.672636	0.183329	0.85454	0.98576	NOG	685	231	S	tetratricopeptide repeat domain	No
ENOG410XTG3	1.41519	1.44479	0.757593	1.90708	0.0565101	0.977446	NOG	691	217	S	o-acyltransferase	No
ENOG410XTGX	0.400773	0.672594	0.724289	0.928626	0.353083	0.977446	NOG	63	55	S	Protein of unknown function (DUF2009)	No
ENOG410XTHA	0.88528	0.954955	0.756402	1.2625	0.20677	0.977446	NOG	329	200	S	mannosyloligosaccharide glucosidase	No
ENOG410XTI3	0.901409	-0.0616569	0.73274	-0.0841457	0.932941	0.997545	NOG	55	54	K	fungal specific transcription factor	No
ENOG410XTIJ	0.302026	0.639808	0.688074	0.929854	0.352447	0.977446	NOG	588	213	S	DCN1, defective in cullin neddylation 1, domain containing	No
ENOG410XTQ6	0.524021	0.506158	0.752816	0.672353	0.501359	0.977446	NOG	23	14	S		No
ENOG410XU94	1.06105	0.856633	0.747082	1.14664	0.251531	0.977446	NOG	44	44	S	Conserved hypothetical, protein	No
ENOG410XUCG	1.2004	0.39287	0.763703	0.514428	0.606953	0.977446	NOG	628	225	S	Ankyrin Repeat	No
ENOG410XUI5	0.31757	0.23716	0.753037	0.314938	0.752809	0.983188	NOG	204	173	O	Proteasome maturation protein	No
ENOG410XVC4	3.60372	1.49479	0.680465	2.19671	0.028041	0.977446	NOG	19	19	K	Cross-pathway control protein	No
ENOG410XVSZ	0.447938	0.152369	0.752865	0.202385	0.839616	0.98576	NOG	582	257	I	Fatty acid desaturase	No
ENOG410XVV6	1.05166	0.0467329	0.729013	0.0641044	0.948887	0.99866	NOG	336	255	S	Hydrolase	No
ENOG410XW3C	0.411587	0.354287	0.720694	0.491591	0.623009	0.977446	NOG	302	142	S		No
ENOG410XWED	0.863679	1.45553	0.763599	1.90615	0.0566311	0.977446	NOG	87	80	O	inosine salvage	No
ENOG410XWMU	1.06689	0.230518	0.762422	0.30235	0.762385	0.98576	NOG	14	7	S	whole genome shotgun sequence	No
ENOG410XWWT	0.994154	0.203273	0.733993	0.276941	0.781825	0.98576	NOG	88	77	S		No
ENOG410XXP2	0.770389	0.81162	0.742302	1.09338	0.274226	0.977446	NOG	260	221	O	26S proteasome nonATPase regulatory subunit	No
ENOG410XXUP	5.21319	-0.13517	0.753865	-0.179303	0.8577	0.98576	NOG	273	149	S	(ABC) transporter	No
ENOG410XXX7	1.13048	0.329255	0.715059	0.460458	0.645187	0.977446	NOG	109	81	S	sphingolipid long chain base-responsive protein	No
ENOG410XXY2	1.75542	1.11631	0.764007	1.46113	0.143979	0.977446	NOG	120	6	S	Amino Acid Auxin Permease (AAAP) Family	No
ENOG410XYGT	1.79884	0.709838	0.725369	0.978588	0.327784	0.977446	NOG	9	9	S		No
ENOG410XYJI	0.724869	1.11732	0.762395	1.46553	0.142775	0.977446	NOG	14	14	S		No
ENOG410XZMQ	2.10886	1.47515	0.696294	2.11858	0.0341264	0.977446	NOG	382	77	S	WNT inhibitory factor 1	No
ENOG410XZUK	0.622588	0.407758	0.750979	0.542969	0.587151	0.977446	NOG	4	4	S		No
ENOG410XZX9	0.678265	0.73256	0.763705	0.959218	0.337449	0.977446	NOG	49	37	S		No
ENOG410Y0FY	0.392186	0.190289	0.754817	0.252099	0.800965	0.98576	NOG	52	43	K	homeobox and C2H2 transcription factor	No
ENOG410Y0R0	1.06909	0.322056	0.723354	0.445226	0.656156	0.977446	NOG	42	42	S	C6 finger domain protein	No
ENOG410Y0WV	2.30441	-1.21298	0.764218	-1.58722	0.112462	0.977446	NOG	19	11	S		No
ENOG410Y16S	11.0405	-0.654108	0.420896	-1.55408	0.120165	0.977446	NOG	4	4	S		No
ENOG410Y21X	1.13953	-2.47701	0.759506	-3.26135	0.00110885	0.541858	NOG	87	8	S		No
ENOG410Y2UE	1.85253	-0.116534	0.764151	-0.152501	0.878792	0.98576	NOG	139	94	O	Secreted metalloproteinase probably acting as a virulence factor (By similarity)	No
ENOG410Y2V3	0.722293	0.958955	0.761181	1.25983	0.207732	0.977446	NOG	30	30	I	mitochondrial F1F0 ATP synthase subunit Atp14	No
ENOG410Y37E	0.594528	0.782557	0.738306	1.05994	0.289174	0.977446	NOG	44	44	S	Conserved hypothetical, protein	No
ENOG410Y3CW	1.04136	0.659159	0.699828	0.941888	0.34625	0.977446	NOG	273	208	J	Component of the eukaryotic translation initiation factor 3 (eIF-3) complex	No
ENOG410Y3MT	0.570464	0.67561	0.731974	0.922998	0.356008	0.977446	NOG	677	215	S	solute carrier family 29 (nucleoside transporters), member	No
ENOG410Y3YU	0.981085	0.227807	0.760577	0.299518	0.764545	0.98576	NOG	281	125	S	Coiled-coil domain containing 109B	No
ENOG410Y41C	2.31769	0.641386	0.691914	0.926974	0.35394	0.977446	NOG	403	133	O	Metacaspase	No
ENOG410Y49V	0.316007	0.212376	0.711449	0.298512	0.765312	0.98576	NOG	190	173	U	Multifunctional regulator of mitochondrial architecture and protein biogenesis. May act in concert with ATP synthase dimers to generate inner membrane structure and consequently normal mitochondrial morphology. Plays a role in keeping cristae membranes connected to the inner boundary membrane. Promotes protein import via the mitochondrial intermembrane space assembly (MIA) pathway (By similarity)	No
ENOG410Y4E6	0.616206	0.702313	0.763733	0.919579	0.357793	0.977446	NOG	40	39	S		No
ENOG410Y4UP	0.332004	0.302378	0.670433	0.451019	0.651976	0.977446	NOG	380	100	T	kinase suppressor of Ras	No
ENOG410Y5IK	1.27383	0.253079	0.726038	0.348576	0.727408	0.983188	NOG	242	213	O	Translocase of inner mitochondrial membrane 44 homolog (Yeast)	No
ENOG410Y5KA	0.542894	-0.00205302	0.682702	-0.0030072	0.997601	0.999646	NOG	9	7	T		No
ENOG410Y5WM	0.83125	0.587746	0.756804	0.776617	0.437385	0.977446	NOG	1396	234	S	Kelch domain containing	No
ENOG410Y6RP	0.246933	0.230781	0.591124	0.39041	0.696233	0.983188	NOG	440	97	T	Fer (Fps fes related) tyrosine kinase	No
ENOG410Y7DR	0.782338	0.96773	0.737393	1.31237	0.189396	0.977446	NOG	539	211	S	set domain containing	No
ENOG410Y7NN	1.4771	0.121105	0.763801	0.158556	0.874019	0.98576	NOG	32	31	S	Conserved hypothetical, protein	No
ENOG410Y89V	0.403327	0.656066	0.756971	0.866699	0.386107	0.977446	NOG	46	33	S	Allergen Asp	No
ENOG410Y8EE	0.909643	0.00272406	0.738952	0.00368639	0.997059	0.999646	NOG	16	16	S		No
ENOG410Y8U4	0.248613	0.338853	0.540711	0.626681	0.530868	0.977446	NOG	21	6	S	EFh	No
ENOG410Y9AP	2.34697	0.0481124	0.731516	0.0657708	0.94756	0.99866	NOG	3	3	S		No
ENOG410Y9CF	1.15823	0.850503	0.725071	1.17299	0.240799	0.977446	NOG	549	226	S	Acyl-transferase	No
ENOG410YA8Z	0.384508	0.393372	0.755927	0.520383	0.602796	0.977446	NOG	612	226	S	Rna-binding protein	No
ENOG410YAMA	1.20384	0.544131	0.714912	0.761116	0.446588	0.977446	NOG	266	229	O	The proteasome is a multicatalytic proteinase complex which is characterized by its ability to cleave peptides with Arg, Phe, Tyr, Leu, and Glu adjacent to the leaving group at neutral or slightly basic pH. The proteasome has an ATP-dependent proteolytic activity (By similarity)	No
ENOG410YAN4	0.732601	0.735192	0.755933	0.972562	0.330771	0.977446	NOG	246	182	S	Methyltransferase like	No
ENOG410YAUW	0.811341	0.843779	0.742182	1.13689	0.255584	0.977446	NOG	307	194	O	heme lyase	No
ENOG410YAYP	4.34454	0.272876	0.508691	0.536428	0.591663	0.977446	NOG	511	212	S	mitochondrial	No
ENOG410YBNZ	2.47798	0.681121	0.669817	1.01688	0.309213	0.977446	NOG	291	206	S	Slowmo homolog	No
ENOG410YBWE	2.68545	0.810291	0.763816	1.06085	0.28876	0.977446	NOG	19	19	S		No
ENOG410YC1M	0.791613	-0.0477821	0.764292	-0.0625182	0.95015	0.99866	NOG	22	22	S	Protein of unknown function (DUF3405)	No
ENOG410YCCP	3.27569	0.33138	0.547705	0.605033	0.545157	0.977446	NOG	1256	236	S	member RAS oncogene family	No
ENOG410YCNW	0.729062	0.308684	0.764202	0.403929	0.686265	0.983188	NOG	324	108	U	ryanodine receptor	No
ENOG410YD00	0.443819	0.398686	0.71699	0.556056	0.578173	0.977446	NOG	15	13	S		No
ENOG410YD2X	0.970688	0.454768	0.762493	0.596422	0.550893	0.977446	NOG	68	64	S		No
ENOG410YDS2	0.711173	1.07965	0.761407	1.41796	0.156201	0.977446	NOG	45	42	S	Conserved hypothetical, protein	No
ENOG410YE6Z	1.02694	0.719887	0.760009	0.947209	0.343533	0.977446	NOG	10	10	S	ZnF_C2H2	No
ENOG410YF7P	8.43951	-0.453408	0.764156	-0.593345	0.55295	0.977446	NOG	16	2	S		No
ENOG410YF8M	0.620516	-0.370911	0.76269	-0.486319	0.626741	0.977446	NOG	320	254	S	reductase	No
ENOG410YGJT	0.24456	0.33573	0.54065	0.620976	0.534616	0.977446	NOG	7	7	S		No
ENOG410YGXU	0.265848	0.425359	0.726066	0.585841	0.557983	0.977446	NOG	437	227	O	UBX domain protein	No
ENOG410YHHF	0.979445	1.2822	0.756398	1.69514	0.0900496	0.977446	NOG	500	220	T	Calcium calmodulin-dependent protein kinase kinase	No
ENOG410YHTD	1.11118	0.328591	0.740814	0.443553	0.657365	0.977446	NOG	75	67	S	Conserved hypothetical, protein	No
ENOG410YI0I	0.806254	0.971984	0.761226	1.27687	0.20165	0.977446	NOG	7	7	S	ZnF_C2H2	No
ENOG410YI5X	0.497013	0.67243	0.75494	0.890707	0.373086	0.977446	NOG	109	27	S		No
ENOG410YIG6	2.74615	-0.0210675	0.695484	-0.0302918	0.975834	0.99866	NOG	4	4	S		No
ENOG410YIKI	2.41736	0.177036	0.563117	0.314386	0.753228	0.983188	NOG	417	236	U	Small GTPase component of the coat protein complex II (COPII) which promotes the formation of transport vesicles from the endoplasmic reticulum (ER). The coat has two main functions, the physical deformation of the endoplasmic reticulum membrane into vesicles and the selection of cargo molecules. SAR1 controls the coat assembly in a stepwise manner. Activated SAR1-GTP binds to membranes first and…	No
ENOG410YITC	0.434844	0.326801	0.751749	0.434721	0.663765	0.980041	NOG	299	105	S	member RAS oncogene	No
ENOG410YJ14	1.0643	0.149173	0.762954	0.195521	0.844985	0.98576	NOG	39	31	S	Pfam:DUF1696	No
ENOG410YJ3P	2.6612	0.254791	0.764239	0.333392	0.738838	0.983188	NOG	12	3	S		No
ENOG410YJG7	0.981864	0.483274	0.738827	0.65411	0.513041	0.977446	NOG	89	73	G	1,3-beta-glucanosyltransferase Gel1	No
ENOG410YJIR	1.71156	1.91107	0.760307	2.51355	0.0119522	0.977446	NOG	12	10	S	Alkaline foam protein B	No
ENOG410YKF6	1.41524	0.355041	0.67051	0.529509	0.596452	0.977446	NOG	250	208	S	protein 2 3 complex subunit	No
ENOG410YKQK	0.822702	0.769478	0.75945	1.0132	0.310963	0.977446	NOG	529	200	S	grancalcin, EF-hand calcium binding protein	No
ENOG410YKSA	0.710647	0.718701	0.738287	0.97347	0.33032	0.977446	NOG	67	56	O	K06254 agrin	No
ENOG410YN01	0.614007	0.845769	0.745397	1.13466	0.25652	0.977446	NOG	12	12	S		No
ENOG410YN06	0.44563	0.492147	0.75853	0.648816	0.516457	0.977446	NOG	232	190	T	serine threonine kinase 16	No
ENOG410YNB6	0.715465	0.385641	0.761637	0.506332	0.612624	0.977446	NOG	13	10	S		No
ENOG410YP05	1.05798	-0.0739762	0.762097	-0.0970693	0.922671	0.992666	NOG	11	7	S		No
ENOG410YQ2G	1.10821	0.543042	0.709117	0.7658	0.443795	0.977446	NOG	301	205	O	thioredoxin-like protein	No
ENOG410YQ9T	0.212875	0.240812	0.577186	0.417217	0.67652	0.982338	NOG	6	6	S		No
ENOG410YRFP	1.30704	-0.0674058	0.751143	-0.0897376	0.928496	0.994579	NOG	7	7	S		No
ENOG410YS6Z	2.56058	0.294888	0.748571	0.393934	0.69363	0.983188	NOG	28	21	S		No
ENOG410YSC3	0.536408	0.846771	0.740222	1.14394	0.252647	0.977446	NOG	10	7	S		No
ENOG410YSN6	0.274561	0.492529	0.66794	0.737386	0.460888	0.977446	NOG	102	92	S	phosphatase domain containing, paladin 1	No
ENOG410YTYB	0.398541	0.173617	0.719221	0.241396	0.809248	0.98576	NOG	7	7	S	MYND finger	No
ENOG410YV83	1.21258	0.899936	0.761794	1.18134	0.237468	0.977446	NOG	220	95	S	Inositol polyphosphate-4-phosphatase, type	No
ENOG410YVC2	4.79613	0.344157	0.757054	0.4546	0.649397	0.977446	NOG	14	14	S	Extracellular matrix protein	No
ENOG410YVEM	1.17887	0.499234	0.71467	0.698551	0.484832	0.977446	NOG	262	222	S	Leukocyte receptor cluster (LRC) member 8	No
ENOG410YVNZ	0.950633	0.82441	0.719937	1.14511	0.252162	0.977446	NOG	200	177	U	translocase of outer mitochondrial membrane 70 homolog A (S. cerevisiae)	No
ENOG410YVQ9	1.40528	-1.66607	0.763007	-2.18356	0.0289944	0.977446	NOG	5	3	S		No
ENOG410YVVX	0.296234	0.344761	0.664745	0.518636	0.604015	0.977446	NOG	7	7	S	Lipase (class 3)	No
ENOG410YWA5	2.8561	0.220374	0.644696	0.341826	0.732482	0.983188	NOG	35	26	S	glucose-repressible protein	No
ENOG410YWJY	0.538145	0.259663	0.761303	0.341077	0.733046	0.983188	NOG	485	200	S	ecotropic viral integration site	No
ENOG410YWTC	2.38272	0	0.550827	0	1	1	NOG	11	10	S		No
ENOG410YX1H	5.02987	0.568809	0.751181	0.75722	0.448918	0.977446	NOG	35	25	S		No
ENOG410YX6C	3.79611	0.678703	0.754345	0.899725	0.368266	0.977446	NOG	25	20	S		No
ENOG410YYAT	1.34751	1.65168	0.752178	2.19587	0.0281015	0.977446	NOG	28	23	S	tyrosinase	No
ENOG410YYCN	0.726458	0.557548	0.763945	0.729828	0.465496	0.977446	NOG	40	40	K	Zinc finger transcription factor	No
ENOG410YZD6	0.577292	-0.0637861	0.749013	-0.0851602	0.932134	0.997451	NOG	7	7	O	DUF2407 ubiquitin-like domain	No
ENOG410YZFT	0.486173	0.241582	0.729398	0.331207	0.740488	0.983188	NOG	6	6	S		No
ENOG410YZUC	0.469634	0.291495	0.722991	0.403179	0.686817	0.983188	NOG	30	4	S	Jacalin-like lectin domain	No
ENOG410Z0AN	0.416342	0.639793	0.756601	0.845614	0.397768	0.977446	NOG	266	211	O	Ubiquitin-conjugating enzyme E2	No
ENOG410Z0G4	2.32012	0.492622	0.640281	0.769384	0.441665	0.977446	NOG	393	210	O	PPIases accelerate the folding of proteins (By similarity)	No
ENOG410Z0UX	0.556606	0.358746	0.753235	0.476274	0.633879	0.977446	NOG	8	8	S		No
ENOG410Z0YK	5.10382	0.282779	0.488763	0.57856	0.562886	0.977446	NOG	8	8	S		No
ENOG410Z1NU	0.529565	0.966756	0.75839	1.27475	0.202399	0.977446	NOG	15	15	S		No
ENOG410Z2A2	2.70328	0.612762	0.744836	0.822681	0.410689	0.977446	NOG	133	83	S	1,3-beta-glucanosyltransferase	No
ENOG410Z3EX	1.81283	1.36336	0.70254	1.94061	0.0523054	0.977446	NOG	3	3	S		No
ENOG410Z3FZ	0.833757	0.360648	0.754688	0.477878	0.632737	0.977446	NOG	402	178	I	fatty acid elongase	No
ENOG410Z47K	0.878309	0.633708	0.73868	0.857892	0.390952	0.977446	NOG	5	5	S		No
ENOG410Z4IE	1.02784	0.553253	0.76398	0.724173	0.46896	0.977446	NOG	45	40	S	Transcription factor	No
ENOG410Z5DF	0.691454	0.847894	0.763248	1.1109	0.266611	0.977446	NOG	514	192	O	Ring finger protein	No
ENOG410Z5PX	0.93916	-1.16761	0.683075	-1.70934	0.0873873	0.977446	NOG	470	229	S	auxiliary factor	No
ENOG410Z6FU	0.9217	0.61278	0.759999	0.806291	0.420075	0.977446	NOG	7	7	S		No
ENOG410Z7RN	0.66829	0.150918	0.76385	0.197575	0.843378	0.98576	NOG	7	7	S		No
ENOG410Z7Z7	1.69005	0.406117	0.712524	0.56997	0.568698	0.977446	NOG	12012	219	S	Pentatricopeptide repeat-containing protein	No
ENOG410Z906	1.2971	1.08599	0.763965	1.42151	0.155167	0.977446	NOG	9	6	S		No
ENOG410ZBC9	1.82712	0.611762	0.739546	0.827213	0.408116	0.977446	NOG	16	14	S	CFEM domain	No
ENOG410ZBK1	4.87523	0.300136	0.550521	0.545186	0.585625	0.977446	NOG	526	202	U	voltage-dependent anion channel	No
ENOG410ZBX3	0.631383	0.861892	0.763893	1.12829	0.259198	0.977446	NOG	1528	159	S	leucine Rich Repeat	No
ENOG410ZCP0	0.68876	0.376922	0.752309	0.50102	0.616357	0.977446	NOG	12	7	S	Hypoxia induced protein conserved region	No
ENOG410ZD72	1.22749	0.369714	0.761724	0.485365	0.627418	0.977446	NOG	62	58	S	arrestin (or S-antigen), N-terminal domain protein	No
ENOG410ZDMK	4.00105	0.540299	0.757759	0.713022	0.475832	0.977446	NOG	29	29	S	serine-threonine rich protein	No
ENOG410ZERS	3.1791	-0.967617	0.714037	-1.35514	0.175374	0.977446	NOG	22	13	S		No
ENOG410ZFCU	0.876893	0.298352	0.763616	0.390709	0.696012	0.983188	NOG	8	8	S	Mitochondrial ATP synthase B chain precursor (ATP-synt_B)	No
ENOG410ZFIP	1.62868	0.567808	0.760183	0.746936	0.455102	0.977446	NOG	8	7	G	Glucanosyltransferase	No
ENOG410ZH1N	1.0874	0.297864	0.748481	0.397958	0.690661	0.983188	NOG	223	92	T	Ribosomal protein S6	No
ENOG410ZH45	0.41305	0.70067	0.687837	1.01866	0.308366	0.977446	NOG	6	6	S		No
ENOG410ZHRP	1.04141	0.19681	0.761959	0.258295	0.796179	0.98576	NOG	56	23	S	amino acid	No
ENOG410ZIM0	1.96132	0.765804	0.680046	1.12611	0.260121	0.977446	NOG	163	85	G	Pectate lyase	No
ENOG410ZITE	0.647241	0.951462	0.762101	1.24847	0.211858	0.977446	NOG	584	184	S	DUF895 domain membrane protein	No
ENOG410ZIWC	0.92395	0.907873	0.756123	1.20069	0.22987	0.977446	NOG	441	127	O	nucleoredoxin-like	No
ENOG410ZKAM	0.681005	0.986205	0.763723	1.29131	0.196595	0.977446	NOG	45	45	S	annexin ANXC4	No
ENOG410ZKCZ	0.532567	1.0282	0.741049	1.3875	0.16529	0.977446	NOG	117	101	S	Chromosome 6 open reading frame 106	No
ENOG410ZKGB	1.07617	-0.934075	0.702323	-1.32998	0.183525	0.977446	NOG	47	7	S		No
ENOG410ZKPI	1.65638	1.66144	0.724773	2.29236	0.0218848	0.977446	NOG	5	4	S		No
ENOG410ZM23	0.305613	0.750301	0.754021	0.995067	0.319704	0.977446	NOG	66	63	S	EF hand domain protein	No
ENOG410ZN2X	1.9688	0.452559	0.763829	0.592487	0.553524	0.977446	NOG	69	56	S	C2 domain-containing protein	No
ENOG410ZNBU	0.752876	0.526319	0.724642	0.726317	0.467645	0.977446	NOG	94	93	S	actin cortical patch localization	No
ENOG410ZNC0	1.69367	0.112172	0.733761	0.152873	0.878499	0.98576	NOG	431	193	S	peroxisomal membrane protein	No
ENOG410ZPMA	0.387882	0.48462	0.726163	0.667371	0.504535	0.977446	NOG	2	2	S	Late embryogenesis abundant protein	No
ENOG410ZRF1	0.717356	0.328892	0.762423	0.431378	0.666194	0.980562	NOG	1052	231	S	Solute carrier family 25	No
ENOG410ZRNX	3.13802	0.474722	0.719623	0.659682	0.509458	0.977446	NOG	22	7	S	Arrestin (or S-antigen), N-terminal domain	No
ENOG410ZRXT	0.563314	0.347232	0.723255	0.480097	0.631159	0.977446	NOG	7	6	S	Hyaluronan / mRNA binding family	No
ENOG410ZS43	0.401242	0.513678	0.623591	0.823742	0.410086	0.977446	NOG	17	8	S		No
ENOG410ZSE4	1.30455	0.694742	0.664488	1.04553	0.295778	0.977446	NOG	203	181	J	Component of the eukaryotic translation initiation factor 3 (eIF-3) complex, which is involved in protein synthesis and, together with other initiation factors, stimulates binding of mRNA and methionyl-tRNAi to the 40S ribosome (By similarity)	No
ENOG410ZSN2	0.93255	0.426119	0.747677	0.569924	0.56873	0.977446	NOG	8	8	S	PH	No
ENOG410ZTSW	0.172026	0.17365	0.568101	0.305668	0.759858	0.98576	NOG	43	43	S	Conserved hypothetical, protein	No
ENOG410ZTYM	0.236597	0.331451	0.66274	0.500122	0.616989	0.977446	NOG	77	76	S	neighbor of Brca1 gene 1	No
ENOG410ZUQH	1.84994	0.908199	0.684844	1.32614	0.184793	0.977446	NOG	163	140	I	atp synthase	No
ENOG410ZVDQ	1.11688	0.59845	0.742748	0.805724	0.420402	0.977446	NOG	544	189	G	SV2 related protein homolog	No
ENOG410ZVEX	0.928892	0.33146	0.764208	0.433729	0.664485	0.980041	NOG	25	14	S	peroxisomal multifunctional enzyme	No
ENOG410ZVKW	1.19915	0.0476822	0.764124	0.0624012	0.950243	0.99866	NOG	64	34	P	Calcium-binding EF hand family protein	No
ENOG410ZVN7	3.5093	-2.22513	0.59623	-3.73199	0.000189971	0.265282	NOG	722	130	G	phosphate transporter	No
ENOG410ZX6F	0.649066	0.619509	0.763478	0.81143	0.417119	0.977446	NOG	144	70	S	alpha-1,2-mannosyltransferase	No
ENOG410ZY2P	1.06364	-0.191107	0.760969	-0.251137	0.801708	0.98576	NOG	85	77	U	PH domain protein	No
ENOG410ZYKB	14.439	0.192141	0.318683	0.602923	0.54656	0.977446	NOG	373	235	J	ribosomal protein S7	No
ENOG410ZYZN	1.84723	0.81701	0.679768	1.2019	0.229404	0.977446	NOG	40	40	S	Conserved hypothetical, protein	No
ENOG4110057	0.648401	0.381412	0.749939	0.50859	0.61104	0.977446	NOG	108	101	S	chromosome 2 open reading frame 69	No
ENOG41100KJ	0.389806	0.346548	0.735584	0.47112	0.637555	0.977446	NOG	311	162	S	Rhomboid domain containing	No
ENOG41101KD	2.99094	1.84889	0.759818	2.43333	0.0149608	0.977446	NOG	81	47	G	The biological conversion of cellulose to glucose generally requires three types of hydrolytic enzymes (1) Endoglucanases which cut internal beta-1,4-glucosidic bonds	No
ENOG41102ZY	1.67446	0.162128	0.764219	0.212149	0.831991	0.98576	NOG	26	26	S	transcription factor	No
ENOG411040D	0.852534	0.977117	0.750333	1.30225	0.192833	0.977446	NOG	46	46	S	Conserved hypothetical, protein	No
ENOG41105IF	0.769884	0.685938	0.730236	0.939338	0.347557	0.977446	NOG	136	38	U	calcium ion binding	No
ENOG41108X7	0.811301	0.940875	0.759981	1.23802	0.215707	0.977446	NOG	130	99	S	ferredoxin-fold anticodon binding domain containing 1	No
ENOG41108YP	0.376569	0.642903	0.683661	0.940383	0.347021	0.977446	NOG	2	2	S	Cyclin, N-terminal domain	No
ENOG411092H	0.77928	0.213569	0.764006	0.279539	0.779831	0.98576	NOG	7	4	S		No
ENOG411093J	0.329219	0.297522	0.674487	0.441109	0.659134	0.977446	NOG	3	3	S	Hepatocellular carcinoma-associated antigen 59	No
ENOG411093M	5.33331	0.506983	0.737019	0.687883	0.491526	0.977446	NOG	4	4	S		No
ENOG411094Q	1.05621	0.494177	0.728208	0.678621	0.497378	0.977446	NOG	3	2	S		No
ENOG4110988	0.926876	0.893319	0.739264	1.20839	0.226898	0.977446	NOG	4	3	S		No
ENOG41109BD	0.837904	-0.160524	0.749189	-0.214263	0.830342	0.98576	NOG	5	4	S		No
ENOG41109BW	3.09162	0.476481	0.671357	0.709727	0.477873	0.977446	NOG	5	4	S	CCT motif	No
ENOG41109DT	0.495011	0.972002	0.760685	1.2778	0.20132	0.977446	NOG	4	4	S		No
ENOG41109E8	0.380211	0.517946	0.726878	0.712562	0.476117	0.977446	NOG	4	4	S	Renin receptor-like protein	No
ENOG41109ES	0.557543	0.583044	0.752372	0.774942	0.438374	0.977446	NOG	5	4	S	PLAC8 family	No
ENOG41109FN	1.36813	0.252739	0.743339	0.340005	0.733852	0.983188	NOG	6	4	S		No
ENOG41109FT	0.554999	0.355021	0.725362	0.48944	0.62453	0.977446	NOG	4	4	S	EGF	No
ENOG41109G6	0.638708	0.497727	0.761629	0.653504	0.513432	0.977446	NOG	4	4	S		No
ENOG41109GB	0.403623	0.705272	0.728968	0.967494	0.333297	0.977446	NOG	4	4	S	PH domain	No
ENOG41109HE	1.09462	-0.0345851	0.76026	-0.0454912	0.963716	0.99866	NOG	2	2	S		No
ENOG41109HZ	2.09108	0.919393	0.763955	1.20346	0.228797	0.977446	NOG	4	4	S		No
ENOG41109KZ	0.633905	1.14544	0.747341	1.53269	0.125352	0.977446	NOG	4	4	S		No
ENOG41109M5	0.944035	0.635155	0.747595	0.849598	0.395549	0.977446	NOG	4	4	S	Pfam:DUF803	No
ENOG41109MM	0.41334	0.661425	0.757926	0.872679	0.382838	0.977446	NOG	4	4	S		No
ENOG41109MN	2.59533	0.320801	0.762055	0.420968	0.673778	0.982336	NOG	5	4	S		No
ENOG41109N4	0.295799	0.243462	0.599534	0.406084	0.684681	0.983188	NOG	4	4	S	PX domain	No
ENOG41109Q3	0.238308	0.197078	0.590965	0.333485	0.738768	0.983188	NOG	8	3	S		No
ENOG41109QN	0.335471	0.44874	0.61083	0.73464	0.462559	0.977446	NOG	4	4	S		No
ENOG41109QX	1.75046	0.296733	0.743872	0.398904	0.689964	0.983188	NOG	5	4	S		No
ENOG41109SD	0.664186	0.529757	0.726111	0.729582	0.465646	0.977446	NOG	5	4	S		No
ENOG41109SM	0.274616	0.301105	0.661899	0.454911	0.649174	0.977446	NOG	4	4	S	Vacuolar sorting protein 9 (VPS9) domain	No
ENOG41109SR	0.362494	0.488283	0.61651	0.792013	0.428353	0.977446	NOG	4	4	S	PH domain	No
ENOG41109US	1.35428	0.132466	0.753177	0.175877	0.860391	0.98576	NOG	4	4	S		No
ENOG41109UZ	1.83248	0.543114	0.764039	0.710846	0.47718	0.977446	NOG	4	4	S	PB1 domain	No
ENOG41109W3	0.239155	0.331092	0.540559	0.612499	0.540208	0.977446	NOG	4	4	S	DENN (AEX-3) domain	No
ENOG41109W6	0.940253	0.367655	0.760768	0.483269	0.628905	0.977446	NOG	4	4	S	EGF_like	No
ENOG41109X8	1.82654	0.524287	0.763082	0.687065	0.492042	0.977446	NOG	3	3	O	Ribosomal protein L41	No
ENOG41109XP	0.520281	0.641941	0.730894	0.878296	0.379783	0.977446	NOG	4	4	S		No
ENOG41109XR	0.682444	0.456708	0.692609	0.659402	0.509637	0.977446	NOG	5	4	S		No
ENOG41109Y1	1.53192	1.20965	0.7621	1.58726	0.112454	0.977446	NOG	4	4	S		No
ENOG41109ZK	0.462362	0.65944	0.733177	0.899428	0.368425	0.977446	NOG	3	3	S		No
ENOG4110A12	0.448766	0.27373	0.631292	0.433603	0.664577	0.980041	NOG	3	3	S		No
ENOG4110A22	0.408533	0.439673	0.751324	0.585198	0.558415	0.977446	NOG	4	4	S	Tetraspanin family	No
ENOG4110A2C	1.03886	0.675392	0.752916	0.897035	0.3697	0.977446	NOG	4	4	S		No
ENOG4110A4G	0.376404	0.0711897	0.720959	0.0987431	0.921342	0.992423	NOG	4	4	S		No
ENOG4110A4S	0.512836	0.724872	0.738504	0.981541	0.326326	0.977446	NOG	4	4	S	Myb-like DNA-binding domain	No
ENOG4110A5P	0.372538	0.373474	0.675846	0.552602	0.580536	0.977446	NOG	2	2	S		No
ENOG4110A5W	1.16412	0.472025	0.745131	0.63348	0.52642	0.977446	NOG	3	3	S	C2 domain	No
ENOG4110A8D	0.761928	0.460296	0.750623	0.613219	0.539731	0.977446	NOG	4	4	S	Membrane-associating domain	No
ENOG4110A8S	0.560135	0.389926	0.734938	0.530556	0.595727	0.977446	NOG	4	4	S	COPI associated protein	No
ENOG4110A8V	0.30992	0.302093	0.607241	0.497485	0.618847	0.977446	NOG	4	4	S		No
ENOG4110A9B	0.828401	0.694311	0.761377	0.911915	0.361813	0.977446	NOG	4	4	S	B-cell receptor-associated protein 31-like	No
ENOG4110A9Q	0.395784	0.388291	0.619045	0.627242	0.530501	0.977446	NOG	4	4	S		No
ENOG4110AA7	0.498173	0.819712	0.695607	1.17841	0.238633	0.977446	NOG	4	4	S	Uncharacterised protein family (UPF0203)	No
ENOG4110AAW	1.02268	0.558277	0.753571	0.740842	0.458789	0.977446	NOG	3	3	S		No
ENOG4110AAX	1.33663	0.523174	0.760955	0.687523	0.491754	0.977446	NOG	4	4	S		No
ENOG4110AB1	0.563016	0.175438	0.753404	0.232861	0.81587	0.98576	NOG	4	4	S		No
ENOG4110ABB	0.752616	0.812515	0.742251	1.09466	0.273664	0.977446	NOG	6	4	S		No
ENOG4110ABQ	1.30347	0.451346	0.764245	0.590577	0.554804	0.977446	NOG	5	4	S		No
ENOG4110ABU	0.37792	0.644055	0.683196	0.942708	0.34583	0.977446	NOG	4	4	S		No
ENOG4110AC9	0.696685	0.933293	0.714889	1.30551	0.19172	0.977446	NOG	4	4	S	Basic region leucine zipper	No
ENOG4110ACA	1.09105	0.80349	0.761127	1.05566	0.291125	0.977446	NOG	3	3	S	Common central domain of tyrosinase	No
ENOG4110ACR	0.619757	0.370611	0.753391	0.491924	0.622773	0.977446	NOG	2	2	S		No
ENOG4110AD9	0.870826	0.153046	0.749488	0.204201	0.838196	0.98576	NOG	2	2	S	60s Acidic ribosomal protein	No
ENOG4110ADT	0.540848	0.470751	0.725049	0.649269	0.516165	0.977446	NOG	4	3	S		No
ENOG4110ADY	0.617878	-0.0917299	0.725784	-0.126387	0.899425	0.987824	NOG	4	4	S		No
ENOG4110AE2	0.701346	0.234362	0.726669	0.322516	0.747062	0.983188	NOG	4	4	S	PX	No
ENOG4110AFI	0.53755	0.461117	0.730452	0.631276	0.52786	0.977446	NOG	4	4	S		No
ENOG4110AFN	0.245858	0.286879	0.587818	0.48804	0.625522	0.977446	NOG	3	3	S	Mitochondrial domain of unknown function (DUF1713)	No
ENOG4110HCP	0.640924	0.471731	0.735993	0.640945	0.521558	0.977446	NOG	22	20	S	endoglucanase	No
ENOG4110PAX	1.62093	0.688664	0.643306	1.07051	0.284391	0.977446	NOG	214	187	S	Myelin expression factor 2	No
ENOG4110TZP	0.389665	0.674466	0.738462	0.913339	0.361064	0.977446	NOG	252	215	U	signal peptidase	No
ENOG4110WE2	2.36197	0.227767	0.741345	0.307234	0.758665	0.98576	NOG	7	7	S		No
ENOG4110WGA	2.2835	-0.198809	0.616197	-0.322638	0.746969	0.983188	NOG	2	2	S		No
ENOG4110WKI	0.978522	0.820158	0.75692	1.08355	0.278566	0.977446	NOG	3	3	S		No
ENOG4110WWP	0.907504	0.757664	0.760714	0.995991	0.319254	0.977446	NOG	7	7	S		No
ENOG4110X3V	3.88186	0.881188	0.733753	1.20093	0.229778	0.977446	NOG	5	5	S	Snodprot-FG	No
ENOG4110X8E	0.657526	0.719273	0.738201	0.974359	0.329878	0.977446	NOG	3	3	S		No
ENOG4110X9M	0.63277	-0.394202	0.72603	-0.542956	0.58716	0.977446	NOG	5	5	U	to neutral amino acid permease	No
ENOG4110X9U	0.374223	0.160886	0.727019	0.221295	0.824863	0.98576	NOG	2	2	S		No
ENOG4110XPP	10.237	0.00414369	0.555561	0.00745856	0.994049	0.998918	NOG	2	2	S		No
ENOG41112PD	2.59999	0.375121	0.642184	0.584133	0.559131	0.977446	NOG	25	14	G	Polysaccharide lyase	No
ENOG41113JB	0.993185	0.235707	0.730721	0.322568	0.747022	0.983188	NOG	6	6	S	CFEM domain	No
ENOG411144D	0.977691	-0.0801284	0.752884	-0.106429	0.915242	0.990218	NOG	4	4	S	RING	No
ENOG411145S	0.936997	-0.505932	0.736216	-0.687206	0.491953	0.977446	NOG	49	42	S	Conserved hypothetical, protein	No
ENOG41115I7	0.361729	0.627396	0.725113	0.865239	0.386907	0.977446	NOG	9	9	S	RTA1 like protein	No
ENOG411190V	1.29891	0.487174	0.75423	0.645922	0.51833	0.977446	NOG	15	15	S		No
ENOG4111BTU	3.43378	-0.00619384	0.58678	-0.0105556	0.991578	0.998918	NOG	9	9	S		No
ENOG4111CKU	0.283362	0.212127	0.663929	0.319502	0.749346	0.983188	NOG	5	5	S		No
ENOG4111FP9	0.282822	0.532706	0.677744	0.786	0.431868	0.977446	NOG	369	154	S	WSC domain containing	No
ENOG4111FTG	0.794549	0.855528	0.743263	1.15104	0.249714	0.977446	NOG	248	204	S	protein 2 3 complex, subunit	No
ENOG4111FVP	6.29373	0.278237	0.36506	0.762168	0.44596	0.977446	NOG	326	219	S	tumor protein	No
ENOG4111G2F	0.52293	-0.413373	0.764365	-0.540806	0.588641	0.977446	NOG	251	201	S	protein 2 3 complex, subunit	No
ENOG4111G58	1.25006	0.96355	0.76295	1.26293	0.206616	0.977446	NOG	31	24	S	Scytalone dehydratase	No
ENOG4111GP2	0.639007	0.359604	0.758628	0.474018	0.635487	0.977446	NOG	1137	225	P	zinc transporter	No
ENOG4111GRE	0.821086	1.18012	0.754968	1.56314	0.118019	0.977446	NOG	94	65	S	SUN domain protein (Uth1)	No
ENOG4111GTV	0.620638	0.316168	0.761799	0.415028	0.678121	0.982338	NOG	29	25	S	Phenolic acid decarboxylase (PAD)	No
ENOG4111H26	5.32927	0.39094	0.577025	0.677509	0.498083	0.977446	NOG	37	37	S	Woronin body major protein	No
ENOG4111HRC	0.338766	0.578265	0.68411	0.845281	0.397954	0.977446	NOG	34	15	K	Transcription factor	No
ENOG4111HSF	0.591754	0.329805	0.762054	0.432785	0.665171	0.980041	NOG	213	193	S	(ribosomal) protein	No
ENOG4111HV1	1.1462	0.144469	0.7601	0.190066	0.849258	0.98576	NOG	98	42	K	Transcription factor	No
ENOG4111I7J	0.504375	0.935455	0.763769	1.22479	0.220655	0.977446	NOG	278	122	T	protein tyrosine phosphatase type IVA	No
ENOG4111IA8	6.61093	-0.779967	0.545378	-1.43014	0.152677	0.977446	NOG	9	8	S		No
ENOG4111ICI	1.19877	1.32003	0.705086	1.87215	0.061186	0.977446	NOG	110	87	S	actin cytoskeleton protein	No
ENOG4111IHJ	1.94691	0.869197	0.666943	1.30325	0.192488	0.977446	NOG	259	188	S	energy coupled proton transport, down electrochemical gradient	No
ENOG4111IHX	1.71868	0.378937	0.75235	0.503672	0.614492	0.977446	NOG	224	206	A	premRNA branch site protein	No
ENOG4111IJ3	0.260422	0.450416	0.597715	0.753563	0.451111	0.977446	NOG	5	4	S	Pfam:DUF540	No
ENOG4111IQ4	0.245591	0.0402897	0.666299	0.060468	0.951783	0.99866	NOG	224	202	U	Vacuolar protein sorting-associated protein	No
ENOG4111J3J	1.05823	0.243731	0.763074	0.319407	0.749418	0.983188	NOG	19	18	G	Has endoglucanase activity on substrates containing beta-1,4 glycosidic bonds, like in carboxymethylcellulose (CMC), hydroxyethylcellulose (HEC) and beta-glucan. Involved in the degradation of complex natural cellulosic substrates	No
ENOG4111J90	0.523568	0.42522	0.763987	0.55658	0.577814	0.977446	NOG	348	202	U	vesicle transport through interaction with t-SNAREs	No
ENOG4111JAT	4.61588	-0.166913	0.448682	-0.372008	0.709887	0.983188	NOG	706	222	U	Microtubule-associated protein 1 light chain 3	No
ENOG4111JAW	0.653243	0.826216	0.751895	1.09884	0.271836	0.977446	NOG	498	208	S	Polymerase (DNA-directed), delta interacting protein 3	No
ENOG4111JAY	2.8419	0.784004	0.680647	1.15185	0.249382	0.977446	NOG	45	45	S	GTP-binding protein EsdC	No
ENOG4111JBG	4.11028	-0.399078	0.509631	-0.783071	0.433585	0.977446	NOG	410	223	K	Component of the nascent polypeptide-associated complex (NAC), a dynamic component of the ribosomal exit tunnel, protecting the emerging polypeptides from interaction with other cytoplasmic proteins to ensure appropriate nascent protein targeting (By similarity). The NAC complex also promotes mitochondrial protein import by enhancing productive ribosome interactions with the outer mitochondrial m…	No
ENOG4111JFW	0.38009	0.551367	0.681338	0.809242	0.418376	0.977446	NOG	75	43	S	Glycosyltransferase (GlcNAc)	No
ENOG4111JHC	2.23606	-0.643242	0.723801	-0.8887	0.374164	0.977446	NOG	165	48	S	senescence-associated protein	No
ENOG4111JI6	1.35481	0.321263	0.762803	0.421162	0.673637	0.982336	NOG	71	65	S	GPI-anchored cell wall organization protein Ecm33	No
ENOG4111JVA	4.18949	1.18187	0.715418	1.652	0.0985349	0.977446	NOG	92	76	S	mitochondrial hypoxia responsive domain protein	No
ENOG4111JYH	0.283552	0.400091	0.746746	0.535779	0.592111	0.977446	NOG	339	183	S	ovarian cancer-associated gene 2 protein	No
ENOG4111KIB	0.564902	0.182804	0.75748	0.241332	0.809298	0.98576	NOG	188	166	U	NADH dehydrogenase (Ubiquinone) 1 alpha subcomplex	No
ENOG4111KNT	0.537259	0.782759	0.761988	1.02726	0.304299	0.977446	NOG	187	177	S	Pyridoxamine 5-phosphate oxidase-related, FMN-binding	No
ENOG4111KYI	2.83662	0.998399	0.673666	1.48204	0.13833	0.977446	NOG	44	44	S	Calcineurin binding protein	No
ENOG4111M4R	0.937603	0.502691	0.760701	0.660827	0.508723	0.977446	NOG	778	131	U	sugar transporter	No
ENOG4111M7X	0.740378	0.847134	0.758486	1.11688	0.264048	0.977446	NOG	68	66	S	Meiotic sister chromatid recombination protein	No
ENOG4111MEJ	0.242239	0.266205	0.665335	0.400106	0.689079	0.983188	NOG	52	51	S	Conserved hypothetical, protein	No
ENOG4111MUX	1.2852	0.153898	0.750275	0.205123	0.837476	0.98576	NOG	45	45	S	Conserved hypothetical, protein	No
ENOG4111MV9	1.34628	0.619011	0.760672	0.813769	0.415777	0.977446	NOG	43	42	S	extracellular serine-threonine rich protein	No
ENOG4111MWT	0.448893	0.422175	0.724978	0.582329	0.560345	0.977446	NOG	17	12	S		No
ENOG4111NK2	1.07165	0.962215	0.749513	1.28379	0.199217	0.977446	NOG	717	219	S	dynein, light chain	No
ENOG4111NV5	18.1672	0.340033	0.497936	0.682883	0.494681	0.977446	NOG	1971	235	B	Core component of nucleosome. Nucleosomes wrap and compact DNA into chromatin, limiting DNA accessibility to the cellular machineries which require DNA as a template. Histones thereby play a central role in transcription regulation, DNA repair, DNA replication and chromosomal stability. DNA accessibility is regulated via a complex set of post-translational modifications of histones, also called h…	No
ENOG4111NW7	1.97043	0.665589	0.741788	0.897277	0.369571	0.977446	NOG	277	160	U	translocase of inner mitochondrial membrane 21 homolog (yeast)	No
ENOG4111NWY	0.661216	0.286937	0.764059	0.375543	0.707257	0.983188	NOG	65	60	S	C2H2 transcription factor (Con7)	No
ENOG4111P0U	0.489447	0.18648	0.729862	0.2555	0.798337	0.98576	NOG	59	29	G	Major Facilitator superfamily	No
ENOG4111PGY	0.662046	0.273572	0.75026	0.364636	0.715383	0.983188	NOG	35	24	S	Alpha/beta hydrolase of unknown function (DUF900)	No
ENOG4111Q5U	1.13256	0.418537	0.760789	0.550135	0.582227	0.977446	NOG	66	31	S		No
ENOG4111QEJ	4.56267	0.884315	0.732938	1.20653	0.227611	0.977446	NOG	46	43	S	Conserved hypothetical, protein	No
ENOG4111QUX	0.689394	0.0823145	0.763855	0.107762	0.914184	0.989804	NOG	303	217	U	nuclear transport factor	No
ENOG4111S0Y	0.946888	0.346653	0.760319	0.455931	0.64844	0.977446	NOG	42	42	S	Conserved hypothetical, protein	No
ENOG4111SSC	0.549481	-0.0225894	0.761716	-0.0296559	0.976341	0.99866	NOG	160	103	U	phosphatidylglycerol phosphatidylinositol transfer protein	No
ENOG4111T0S	1.08533	1.20675	0.759468	1.58895	0.112072	0.977446	NOG	43	43	S	Conserved hypothetical, protein	No
ENOG4111T32	4.31666	0.186634	0.556	0.335673	0.737117	0.983188	NOG	233	171	J	protein complex subunit organization	No
ENOG4111TN9	0.742414	0.787811	0.750064	1.05033	0.293569	0.977446	NOG	33	33	S	Ornithine decarboxylase antizyme	No
ENOG4111TR4	1.2316	0.401411	0.686069	0.585088	0.558488	0.977446	NOG	377	350	C	etc complex i subunit conserved region	No
ENOG4111TTK	3.2233	0.40469	0.635208	0.637098	0.524061	0.977446	NOG	801	230	S	Cyclin-dependent protein kinase	No
ENOG4111UER	0.955852	0.0900292	0.729576	0.123399	0.901791	0.987824	NOG	282	211	S	mitochondrial pyruvate carrier 2	No
ENOG4111UJC	0.33746	0.159851	0.717394	0.222821	0.823674	0.98576	NOG	14	13	S	vesicle-associated membrane protein	No
ENOG4111URX	0.44501	-0.387217	0.763807	-0.506956	0.612185	0.977446	NOG	180	147	O	microsomal glutathione S-transferase	No
ENOG4111UVJ	7.72174	0.0834092	0.419139	0.199001	0.842262	0.98576	NOG	384	230	J	Ribosomal protein	No
ENOG4111UVS	0.413092	0.47002	0.725081	0.648231	0.516835	0.977446	NOG	76	65	S	FYVE zinc finger protein	No
ENOG4111UWC	1.34	0.0789572	0.758971	0.104032	0.917144	0.990813	NOG	537	135	S	zinc finger	No
ENOG4111VKY	0.908341	1.07666	0.76101	1.41478	0.157133	0.977446	NOG	947	388	S	Dehydrogenase	No
ENOG4111W00	0.714663	0.937413	0.76353	1.22774	0.219546	0.977446	NOG	122	90	S	Ubiquitin metalloprotease fusion protein	No
ENOG4111X3D	0.728687	-0.219949	0.759409	-0.289631	0.772098	0.98576	NOG	21	21	S	SCP-2 sterol transfer family	No
ENOG4111X5E	0.74288	0.231599	0.76388	0.303187	0.761747	0.98576	NOG	8	7	K	Basic region leucine zipper	No
ENOG4111X5Y	1.27552	0.407545	0.755919	0.539138	0.589791	0.977446	NOG	43	43	S	Conserved hypothetical, protein	No
ENOG4111XEM	0.988526	-0.158418	0.752705	-0.210464	0.833305	0.98576	NOG	261	183	O	cytochrome C oxidase	No
ENOG4111XQR	1.50867	0.515234	0.710779	0.724887	0.468521	0.977446	NOG	64	63	K	BZIP transcription factor (HacA)	No
ENOG4111XVR	0.680792	0.841572	0.75736	1.11119	0.266485	0.977446	NOG	196	180	I	NADH dehydrogenase (ubiquinone) activity	No
ENOG4111XWY	2.67545	1.16509	0.68602	1.69833	0.089446	0.977446	NOG	58	56	S	integral membrane protein	No
ENOG4111YZY	0.538269	0.402039	0.763246	0.526749	0.598368	0.977446	NOG	60	60	I	NADH ubiquinone oxidoreductase	No
ENOG4111Z48	0.547328	0.276014	0.688852	0.400686	0.688651	0.983188	NOG	173	120	S	May have a role in the cell cycle (By similarity)	No
ENOG4111Z6B	0.824989	0.339545	0.748488	0.453641	0.650087	0.977446	NOG	39	34	S		No
ENOG4111ZPV	2.35291	0.633827	0.637345	0.994481	0.319989	0.977446	NOG	39	39	S	conserved hypothetical protein	No
ENOG41120HA	0.677332	0.16013	0.76184	0.210188	0.833521	0.98576	NOG	40	40	K	B-zip transcription factor	No
ENOG41121N2	2.65214	1.51242	0.691822	2.18614	0.0288056	0.977446	NOG	6623	237	O	zinc ion binding	No
ENOG41121RT	1.92549	0.610822	0.613457	0.995705	0.319394	0.977446	NOG	317	221	S	Prostaglandin E synthase 3 (Cytosolic)	No
ENOG41121SE	1.78048	0.138338	0.725044	0.1908	0.848682	0.98576	NOG	56	50	S	Transcription factor	No
ENOG41121WM	2.59439	0.405614	0.55397	0.732196	0.464049	0.977446	NOG	357	194	O	cytochrome C oxidase	No
ENOG4112229	6.37825	0.383839	0.445192	0.862188	0.388584	0.977446	NOG	291	208	J	Ribosomal protein L38	No
ENOG4112266	11.7633	-0.251679	0.396627	-0.634549	0.525723	0.977446	NOG	284	210	J	40S ribosomal protein S21	No
ENOG41122P5	1.94928	1.06755	0.628806	1.69774	0.0895572	0.977446	NOG	616	223	S	actin-depolymerizing factor	No
ENOG41122Q2	2.09637	0.562596	0.761344	0.738951	0.459936	0.977446	NOG	33	29	S	ThiJ PfpI family protein	No
ENOG411230N	0.552699	1.18834	0.762586	1.55831	0.11916	0.977446	NOG	182	164	I	NADH dehydrogenase (ubiquinone) 1 beta subcomplex	No
ENOG41123BH	0.494013	0.0238523	0.763013	0.0312606	0.975062	0.99866	NOG	166	150	I	Ubiquinol-cytochrome c reductase complex	No
ENOG41123CD	2.46536	1.07002	0.60038	1.78224	0.0747107	0.977446	NOG	56	56	S	B-zip transcription factor	No
ENOG41123KC	11.3831	0.160665	0.390007	0.411954	0.680373	0.983188	NOG	300	211	J	40s ribosomal protein s30	No
ENOG4112428	10.6709	-0.20123	0.297826	-0.675662	0.499255	0.977446	NOG	334	185	J	ribosomal protein l29	No
ENOG411255K	2.60773	0.535356	0.76373	0.700975	0.483318	0.977446	NOG	23	11	G	major facilitator superfamily (MFS)	No
ENOG411255Z	0.562486	0.261387	0.730783	0.357681	0.720582	0.983188	NOG	22	8	S	croquemort-like mating protein M82	No
ENOG41125CF	0.693562	0.33925	0.763777	0.444175	0.656916	0.977446	NOG	67	67	I	Mitochondrial F1F0 ATP synthase subunit F	No
ENOG41125XE	0.661518	0.614991	0.756323	0.813132	0.416142	0.977446	NOG	10	10	S	Protein of unknown function (DUF3712)	No
ENOG41125ZR	4.36837	0.060603	0.553858	0.10942	0.91287	0.989804	NOG	12	10	S	HI0933-like protein	No
ENOG411261V	0.551557	0.367317	0.758212	0.484452	0.628065	0.977446	NOG	38	38	S	Protein of unknown function (DUF3602)	No
ENOG41126JC	1.79448	0.577525	0.758447	0.761457	0.446384	0.977446	NOG	77	34	S	Sulfatase domain protein	No
ENOG411270Y	0.660719	0.41151	0.750816	0.548084	0.583635	0.977446	NOG	48	25	S		No
ENOG41128HR	1.01834	0.0305464	0.701019	0.0435742	0.965244	0.99866	NOG	27	7	S		No
ENOG41128IA	0.989662	0.689794	0.756865	0.911383	0.362093	0.977446	NOG	15	6	S		No
ENOG4112A8W	0.671895	0.756645	0.763505	0.991015	0.321678	0.977446	NOG	36	36	S		No
ENOG4112A9T	1.24412	1.33799	0.758869	1.76314	0.0778771	0.977446	NOG	21	21	S	F-box domain	No
ENOG4112AV8	0.500034	0.855337	0.762334	1.122	0.261863	0.977446	NOG	29	29	S		No
ENOG4112CVC	2.99439	0.698711	0.722864	0.966588	0.33375	0.977446	NOG	17	17	S	RTA1 like protein	No

## Sheet: DESeq2_COGs_CvsB
id	baseMean	log2FoldChange	lfcSE	stat	pvalue	padj	Database	Protein count	Species count	COG functional category	Consensus functional description	Significant
COG0443	18.5359	1.39421	0.320233	4.35375	1.3383e-05	0.000704064	NOG	2463	238	B	histone h2a	Yes
COG5277	18.1672	1.50341	0.403684	3.72423	0.00019591	0.00423306	NOG	1971	235	B	Core component of nucleosome. Nucleosomes wrap and compact DNA into chromatin, limiting DNA accessibility to the cellular machineries which require DNA as a template. Histones thereby play a central role in transcription regulation, DNA repair, DNA replication and chromosomal stability. DNA accessibility is regulated via a complex set of post-translational modifications of histones, also called h…	Yes
COG0474	2.87621	-1.63631	0.534135	-3.06347	0.00218787	0.0214338	NOG	3125	231	BK	bromodomain	Yes
COG5272	15.3482	-1.51078	0.429657	-3.51625	0.000437696	0.00756588	NOG	3418	1443	C	Dehydrogenase	Yes
COG0048	9.42197	-1.32828	0.42535	-3.12281	0.00179136	0.0188482	NOG	1994	900	C	alcohol dehydrogenase	Yes
COG0105	6.95759	-1.8885	0.499151	-3.78342	0.00015469	0.00374349	NOG	2827	954	C	alcohol dehydrogenase	Yes
COG0522	6.44283	-1.18003	0.402675	-2.93049	0.00338432	0.027546	NOG	6682	1478	C	Aldo keto reductase	Yes
COG1215	5.49259	-1.54566	0.543475	-2.84403	0.00445471	0.0339006	NOG	2076	1459	C	Key enzyme in the regulation of glycerol uptake and metabolism (By similarity)	Yes
ENOG410XNQK	1.87879	-1.66699	0.634482	-2.62732	0.00860593	0.0498194	NOG	1157	636	C	ATPase 116 kDa subunit	Yes
COG0326	1.84239	2.26323	0.619485	3.65341	0.000258776	0.0050503	NOG	489	473	C	Isocitrate dehydrogenase	Yes
COG0099	3.66537	-2.43943	0.635615	-3.8379	0.000124091	0.00333666	NOG	3136	412	DZ	regulator of chromosome condensation	Yes
COG0515	21.1943	-2.05493	0.473703	-4.33801	1.43777e-05	0.000724878	NOG	4335	945	E	oxidoreductase	Yes
COG0185	15.3587	-1.20805	0.319803	-3.77747	0.000158431	0.00375886	NOG	10662	1566	E	amino acid	Yes
COG0184	12.8169	-1.66012	0.484682	-3.42517	0.000614408	0.0096483	NOG	5139	1488	E	Dehydrogenase	Yes
COG0477	5.46034	-1.69942	0.531823	-3.19546	0.00139608	0.0164005	NOG	1414	717	E	aminotransferase	Yes
COG1131	4.93908	-2.01612	0.495363	-4.06998	4.70176e-05	0.00177785	NOG	2644	405	E	carboxy-peptidase	Yes
COG2303	3.06647	-1.68716	0.539369	-3.12802	0.00175988	0.0186794	NOG	3098	976	E	decarboxylase	Yes
COG1028	2.1129	-2.02318	0.6899	-2.93257	0.0033617	0.027546	NOG	1727	1559	E	Catalyzes the transfer of a phosphate group to glutamate to form glutamate 5-phosphate which rapidly cyclizes to 5- oxoproline (By similarity)	Yes
COG0057	1.51633	2.19546	0.674674	3.25411	0.00113749	0.0141893	NOG	1803	1543	E	The beta subunit is responsible for the synthesis of L- tryptophan from indole and L-serine (By similarity)	Yes
COG0148	3.27264	-1.42111	0.526724	-2.69802	0.00697543	0.0442118	NOG	8743	1813	EG	membrane	Yes
COG5262	34.811	1.43748	0.471712	3.04736	0.00230863	0.0220426	NOG	2370	1663	F	Major role in the synthesis of nucleoside triphosphates other than ATP. The ATP gamma phosphate is transferred to the NDP beta phosphate via a ping-pong mechanism, using a phosphorylated active-site intermediate (By similarity)	Yes
ENOG4111NV5	30.0723	-1.04425	0.208478	-5.00891	5.47405e-07	9.46228e-05	NOG	9465	680	G	Transporter	Yes
COG1383	23.7991	-1.21846	0.277484	-4.39111	1.12775e-05	0.000670931	NOG	18432	1860	G	major facilitator Superfamily	Yes
ENOG410XNRS	19.6481	0.85304	0.31845	2.67873	0.0073903	0.0458578	NOG	3934	2007	G	glyceraldehyde3phosphate dehydrogenase	Yes
COG5022	19.06	0.95478	0.349924	2.72853	0.0063617	0.0422948	NOG	2613	1996	G	Catalyzes the reversible conversion of 2- phosphoglycerate into phosphoenolpyruvate. It is essential for the degradation of carbohydrates via glycolysis (By similarity)	Yes
COG0531	7.86367	-3.21722	0.592101	-5.43357	5.52372e-08	1.33674e-05	NOG	1526	442	G	Glycoside hydrolase Family 5	Yes
COG1052	7.34842	-2.34434	0.606626	-3.86455	0.000111293	0.0032063	NOG	504	159	G	cell wall	Yes
COG0842	5.49598	-1.14095	0.423491	-2.69415	0.00705686	0.0442118	NOG	1320	665	G	synthase	Yes
COG0183	4.7558	-1.53478	0.505247	-3.03768	0.00238403	0.0220426	NOG	4638	1379	G	hydrolase family 3	Yes
COG1063	4.40801	-2.02749	0.505074	-4.01425	5.96361e-05	0.00191772	NOG	1955	509	G	hydrolase family 16	Yes
COG0526	4.32753	-1.54525	0.588282	-2.62672	0.00862125	0.0498194	NOG	3642	1205	G	Channel that permits osmotically driven movement of water in both directions. It is involved in the osmoregulation and in the maintenance of cell turgor during volume expansion in rapidly growing cells. It mediates rapid entry or exit of water in response to abrupt changes in osmolarity (By similarity)	Yes
ENOG410XRMJ	4.19075	-1.73565	0.540617	-3.2105	0.00132505	0.0158743	NOG	1247	602	G	trehalose biosynthetic process	Yes
ENOG410XPUN	3.65275	-2.64186	0.732456	-3.60686	0.000309929	0.0058596	NOG	2208	468	G	chitinase	Yes
ENOG410XNPH	3.59938	-1.66141	0.587564	-2.82762	0.00468947	0.0343895	NOG	1216	702	G	Mannitol dehydrogenase	Yes
COG5048	3.15231	-2.58333	0.629604	-4.1031	4.07644e-05	0.00164416	NOG	2175	759	G	SMP-30 gluconolaconase LRE domain protein	Yes
ENOG4112266	2.71282	-2.12874	0.636367	-3.34515	0.000822379	0.0116755	NOG	3564	877	G	beta-glucosidase	Yes
COG5021	2.68114	-2.27717	0.768144	-2.96451	0.00303164	0.0254974	NOG	621	315	G	glucosylceramidase activity	Yes
COG0666	2.60773	-3.13852	0.815367	-3.84921	0.000118499	0.00325873	NOG	23	11	G	major facilitator superfamily (MFS)	Yes
COG0625	1.62868	-2.74574	0.829915	-3.30846	0.000938113	0.0127541	NOG	8	7	G	Glucanosyltransferase	Yes
COG2058	1.11688	-2.13938	0.756376	-2.82846	0.00467724	0.0343895	NOG	544	189	G	SV2 related protein homolog	Yes
COG0401	0.981143	-2.23228	0.77319	-2.88711	0.003888	0.0305486	NOG	670	461	G	Aldose 1epimerase	Yes
COG0086	4.55385	-1.21765	0.460464	-2.6444	0.0081836	0.0492645	NOG	4244	1623	H	small protein activating enzyme activity	Yes
COG1062	13.0754	-1.01043	0.37297	-2.70916	0.0067454	0.0436903	NOG	6445	1434	I	acetyl-coa acetyltransferase	Yes
COG0450	6.79204	0.921526	0.349885	2.6338	0.00844351	0.0498194	NOG	4516	1425	I	Catalyzes the conversion of acetate into acetyl-CoA (AcCoA), an essential intermediate at the junction of anabolic and catabolic pathways. AcsA undergoes a two-step reaction. In the first half reaction, AcsA combines acetate with ATP to form acetyl-adenylate (AcAMP) intermediate. In the second half reaction, it can then transfer the acetyl group from AcAMP to the sulfhydryl group of CoA, forming …	Yes
COG2053	6.73685	-1.88052	0.428693	-4.38663	1.15122e-05	0.000670931	NOG	3261	1137	I	Amp-dependent synthetase and ligase	Yes
COG1727	6.49668	-2.14999	0.522703	-4.11322	3.90179e-05	0.00162799	NOG	3915	1618	I	Catalyzes the reversible phosphatidyl group transfer from one phosphatidylglycerol molecule to another to form cardiolipin (CL) (diphosphatidylglycerol) and glycerol (By similarity)	Yes
COG0484	1.84747	-1.84337	0.609732	-3.02325	0.00250072	0.0227509	NOG	687	453	I	acyl-CoA dehydrogenase	Yes
ENOG410YF7P	1.50878	-2.20039	0.732903	-3.00229	0.00267957	0.0238402	NOG	2485	1272	I	diacylglycerol kinase	Yes
COG0631	1.0325	-2.316	0.752116	-3.07931	0.0020748	0.0205779	NOG	318	207	I	phosphatidylinositol 4-kinase	Yes
COG2730	0.929952	-2.18422	0.805949	-2.71012	0.00672587	0.0436903	NOG	572	240	I	phosphotransferase 1	Yes
COG0255	35.1967	0.971466	0.348398	2.78838	0.00529727	0.0374836	NOG	2427	2013	J	Interacts with and stabilizes bases of the 16S rRNA that are involved in tRNA selection in the A site and with the mRNA backbone. Located at the interface of the 30S and 50S subunits, it traverses the body of the 30S subunit contacting proteins on the other side and probably holding the rRNA structure together. The combined cluster of proteins S8, S12 and S17 appears to hold together the shoulder…	Yes
COG5309	31.6186	0.974708	0.274987	3.54456	0.000393267	0.00710229	NOG	2634	2024	J	One of the primary rRNA binding proteins, it binds directly to 16S rRNA where it nucleates assembly of the body of the 30S subunit (By similarity)	Yes
COG2124	27.5809	1.01359	0.340417	2.9775	0.00290609	0.0252977	NOG	2275	1998	J	Located at the top of the head of the 30S subunit, it contacts several helices of the 16S rRNA. In the 70S ribosome it contacts the 23S rRNA (bridge B1a) and protein L5 of the 50S subunit (bridge B1b), connecting the 2 subunits	Yes
COG1064	25.8416	0.844225	0.311889	2.70681	0.00679332	0.0436903	NOG	2292	1996	J	Protein S19 forms a complex with S13 that binds strongly to the 16S ribosomal RNA (By similarity)	Yes
COG0365	24.8673	1.05302	0.329172	3.19899	0.0013791	0.01636	NOG	2387	2001	J	Forms an intersubunit bridge (bridge B4) with the 23S rRNA of the 50S subunit in the ribosome (By similarity)	Yes
COG1022	17.7361	0.976111	0.320587	3.04476	0.00232863	0.0220426	NOG	472	343	J	Ribosomal protein	Yes
COG1502	11.7633	0.845243	0.309687	2.72935	0.00634596	0.0422948	NOG	284	210	J	40S ribosomal protein S21	Yes
COG0376	10.5656	-1.10565	0.33077	-3.34265	0.000829827	0.0116755	NOG	832	339	J	Ribosomal protein	Yes
COG0667	8.99141	1.51162	0.375705	4.02343	5.73578e-05	0.00191772	NOG	393	305	J	Ribosomal protein	Yes
COG0841	8.88053	-1.23517	0.398476	-3.09973	0.00193696	0.0198621	NOG	448	339	J	Ribosomal protein	Yes
COG4870	7.57888	-1.38726	0.388881	-3.56731	0.000360659	0.0067138	NOG	1886	1712	J	50s ribosomal protein l29	Yes
COG5253	3.52955	-1.60581	0.498601	-3.22063	0.0012791	0.0154771	NOG	553	334	J	Promotes the exchange of GDP for GTP in EF-1-alpha GDP, thus allowing the regeneration of EF-1-alpha GTP that could then be used to form the ternary complex EF-1-alpha GTP AAtRNA (By similarity)	Yes
ENOG410XNNC	9.72072	0.873656	0.311065	2.80859	0.00497585	0.0358379	NOG	3112	2013	K	DNA-dependent RNA polymerase catalyzes the transcription of DNA into RNA using the four ribonucleoside triphosphates as substrates (By similarity)	Yes
COG0446	3.60372	-1.9159	0.661348	-2.89696	0.00376792	0.0299947	NOG	19	19	K	Cross-pathway control protein	Yes
COG5069	3.37852	-2.48646	0.678492	-3.66468	0.000247645	0.00494032	NOG	5168	238	K	Myblike DNAbinding domain containing protein	Yes
COG0451	2.23565	-2.56567	0.829104	-3.0945	0.00197142	0.0200246	NOG	212	133	K	proto-oncogene	Yes
COG0380	1.50867	-2.30928	0.724741	-3.18636	0.00144076	0.016602	NOG	64	63	K	BZIP transcription factor (HacA)	Yes
COG0554	4.49206	1.6679	0.627091	2.65974	0.00782014	0.0477898	NOG	2789	375	L	transposase	Yes
COG1448	3.87337	1.46831	0.541468	2.71172	0.00669343	0.0436903	NOG	2569	1690	L	The UvrABC repair system catalyzes the recognition and processing of DNA lesions. UvrA is an ATPase and a DNA-binding protein. A damage recognition complex composed of 2 UvrA and 2 UvrB subunits scans DNA for abnormalities. When the presence of a lesion has been verified by UvrB, the UvrA molecules dissociate (By similarity)	Yes
ENOG411093M	3.45223	2.13305	0.562746	3.79042	0.00015039	0.00371372	NOG	3498	2003	L	Releases the supercoiling and torsional tension of DNA, which is introduced during the DNA replication and transcription, by transiently cleaving and rejoining one strand of the DNA duplex. Introduces a single-strand break via transesterification at a target site in duplex DNA. The scissile phosphodiester is attacked by the catalytic tyrosine of the enzyme, resulting in the formation of a DNA-(5'…	Yes
ENOG410YX1H	2.98997	1.71852	0.629499	2.72999	0.00633365	0.0422948	NOG	1511	1405	L	The heterodimer acts as both an ATP-dependent DNA helicase and an ATP-dependent, dual-direction single-stranded exonuclease. Recognizes the chi site generating a DNA molecule suitable for the initiation of homologous recombination. The AddA nuclease domain is required for chi fragment generation	Yes
ENOG410XNV7	1.25331	-2.91633	0.775093	-3.76255	0.000168192	0.00383984	NOG	1321	239	L	domain) containing	Yes
COG0596	31.0075	-0.97698	0.37142	-2.63039	0.00852873	0.0498194	NOG	4437	1349	M	Glycosyl transferase, family 2	Yes
COG2939	5.61925	-1.55109	0.470402	-3.29737	0.000975962	0.012864	NOG	11141	1779	M	Nad-dependent epimerase dehydratase	Yes
ENOG410ZBK1	94.904	0.508653	0.15251	3.33522	0.000852331	0.0118543	NOG	7226	1957	O	Heat shock protein	Yes
ENOG410YVC2	59.4521	0.864041	0.246011	3.51221	0.000444398	0.00757355	NOG	2822	245	O	ubiquitin	Yes
COG1472	27.8071	1.11821	0.195188	5.7289	1.01086e-08	3.05784e-06	NOG	2241	1308	O	Molecular chaperone. Has ATPase activity (By similarity)	Yes
COG0476	12.7077	-1.34988	0.308614	-4.37401	1.21987e-05	0.000670931	NOG	13718	2015	O	Thioredoxin	Yes
COG3293	11.3174	-1.68884	0.420955	-4.01192	6.02258e-05	0.00191772	NOG	3999	239	O	ubiquitin protein ligase	Yes
COG2273	10.8212	-1.62188	0.35329	-4.59078	4.41591e-06	0.00041102	NOG	6565	894	O	glutathione Stransferase	Yes
COG0580	9.16654	1.15956	0.331953	3.49314	0.000477368	0.00802244	NOG	2907	1583	O	alkyl hydroperoxide reductase	Yes
COG5245	8.84752	-1.77618	0.372095	-4.77346	1.81091e-06	0.0001992	NOG	7941	1952	O	ATP binding to DnaK triggers the release of the substrate protein, thus completing the reaction cycle. Several rounds of ATP-dependent interactions between DnaJ, DnaK and GrpE are required for fully efficient folding. Also involved, together with DnaK and GrpE, in the DNA replication of plasmids through activation of initiation proteins (By similarity)	Yes
COG1877	5.98113	-3.01781	0.80023	-3.77118	0.000162478	0.00378073	NOG	3530	321	O	cathepsin	Yes
ENOG4111JVA	5.0259	-1.86849	0.510066	-3.66323	0.000249057	0.00494032	NOG	4004	225	O	aspartic	Yes
COG5059	2.65214	-2.33719	0.683711	-3.41839	0.00062993	0.0096483	NOG	6623	237	O	zinc ion binding	Yes
ENOG410XNZ9	2.25323	-1.67341	0.558534	-2.99608	0.00273473	0.0241535	NOG	532	237	O	cop9 signalosome complex subunit	Yes
COG5043	1.82654	-3.12913	0.858323	-3.64563	0.000266738	0.00512306	NOG	3	3	O	Ribosomal protein L41	Yes
COG2930	1.79572	-2.70597	0.711676	-3.80225	0.000143386	0.00365662	NOG	1595	237	O	ubiquitin carboxyl-terminal hydrolase	Yes
ENOG4110X3V	1.64956	-2.18638	0.791488	-2.76237	0.00573832	0.0396764	NOG	394	233	O	endosome to lysosome transport via multivesicular body sorting pathway	Yes
COG0178	1.29914	-2.71613	0.8676	-3.13063	0.00174433	0.0186782	NOG	174	127	O	DnaJ (Hsp40) homolog, subfamily C, member 13	Yes
ENOG410YX6C	1.26309	-2.58591	0.91812	-2.81652	0.00485465	0.0351744	NOG	311	117	O	surfactant protein B	Yes
COG2197	1.10821	-1.9084	0.726809	-2.62573	0.00864634	0.0498194	NOG	301	205	O	thioredoxin-like protein	Yes
COG0179	0.956633	-2.41491	0.79432	-3.04022	0.00236406	0.0220426	NOG	376	219	O	Importin	Yes
COG5184	0.926517	-2.56348	0.776032	-3.30331	0.000955497	0.0128461	NOG	1209	231	O	ubiquitin carboxyl-terminal hydrolase	Yes
COG3325	60.8595	-0.939569	0.21212	-4.42942	9.44848e-06	0.000670931	NOG	6160	1364	P	P-type atpase	Yes
ENOG410XVC4	6.47153	-1.41642	0.438564	-3.22967	0.00123933	0.015302	NOG	1097	683	P	Bifunctional enzyme with both catalase and broad- spectrum peroxidase activity (By similarity)	Yes
COG0246	6.40732	1.6458	0.463785	3.54863	0.000387242	0.00709944	NOG	6039	1218	P	acriflavin resistance protein	Yes
COG0655	5.75666	-1.33473	0.47076	-2.83527	0.00457876	0.0339896	NOG	1006	221	P	ATPase, Ca transporting, plasma membrane	Yes
COG2092	3.22846	1.47086	0.543695	2.7053	0.00682436	0.0436903	NOG	4688	784	P	receptor	Yes
COG0550	2.56384	2.10018	0.664618	3.15998	0.00157782	0.0175846	NOG	5770	1464	P	Binding-protein-dependent transport systems inner membrane component	Yes
COG5273	7.16804	-1.56753	0.475477	-3.29676	0.000978088	0.012864	NOG	21600	772	Q	Cytochrome p450	Yes
COG1819	3.69766	-2.13571	0.577849	-3.69597	0.000219051	0.00465004	NOG	3766	1426	Q	Fumarylacetoacetate hydrolase	Yes
COG5147	2.31993	-1.68175	0.611319	-2.75102	0.00594092	0.0404877	NOG	1214	435	Q	protocatechuate 3,4-dioxygenase	Yes
COG0577	19.719	-1.27023	0.366419	-3.46659	0.000527098	0.00861877	NOG	23097	1761	S	Dehydrogenase reductase	Yes
COG4886	16.4447	1.68249	0.417648	4.02848	5.61383e-05	0.00191772	NOG	360	231	S	GTP-binding nuclear protein	Yes
COG5594	12.2243	-3.95397	0.685408	-5.76879	7.98446e-09	3.05784e-06	NOG	1216	176	S	annexin A7	Yes
COG5052	11.7712	-1.76181	0.471076	-3.73996	0.000184047	0.00407853	NOG	35396	237	S	Zinc finger protein	Yes
COG0697	11.0587	-2.8668	0.580162	-4.94139	7.75695e-07	0.000117324	NOG	21970	1000	S	Ankyrin Repeat	Yes
ENOG410XPAQ	9.85048	-1.23412	0.375131	-3.28985	0.00100241	0.0130421	NOG	484	253	S	hydrophobic protein	Yes
COG1629	8.43951	-3.92295	0.667725	-5.8751	4.22581e-09	2.55662e-06	NOG	16	2	S		Yes
COG3386	5.73472	-1.95125	0.642411	-3.03738	0.00238643	0.0220426	NOG	5752	1651	S	pyridine nucleotide-disulfide oxidoreductase	Yes
ENOG410XPC8	5.33331	-4.03799	0.830783	-4.86046	1.17114e-06	0.000141708	NOG	4	4	S		Yes
ENOG410ZRNX	5.02987	-2.83524	0.713623	-3.97302	7.09676e-05	0.00220182	NOG	35	25	S		Yes
ENOG41109BW	5.01943	-1.49551	0.443479	-3.37221	0.000745665	0.0108705	NOG	11662	1757	S	Alpha beta hydrolase	Yes
COG0076	4.79613	-3.32048	0.755693	-4.39395	1.1131e-05	0.000670931	NOG	14	14	S	Extracellular matrix protein	Yes
ENOG4112CVC	4.18949	-2.07776	0.70145	-2.9621	0.00305548	0.0254974	NOG	92	76	S	mitochondrial hypoxia responsive domain protein	Yes
COG2940	4.09455	-1.79485	0.507578	-3.53612	0.000406057	0.00722542	NOG	922	216	S	carnitine	Yes
COG1074	3.96477	-2.45467	0.594075	-4.13191	3.5976e-05	0.00155468	NOG	698	366	S	SH3 domain containing, Ysc84-like 1 (S. cerevisiae)	Yes
COG5076	3.88186	-2.48938	0.727511	-3.42177	0.000622138	0.0096483	NOG	5	5	S	Snodprot-FG	Yes
ENOG410YIG6	3.79611	-2.76156	0.803514	-3.43685	0.000588513	0.00936974	NOG	25	20	S		Yes
COG2723	3.57022	-2.86885	0.647553	-4.43029	9.41082e-06	0.000670931	NOG	2516	1140	S	Nadph-dependent fmn reductase	Yes
ENOG410Z2A2	3.44483	-2.51582	0.619599	-4.06039	4.899e-05	0.0017963	NOG	3527	238	S	Zinc finger, DHHC-type containing	Yes
COG5520	3.43024	-1.89589	0.613094	-3.09233	0.00198591	0.0200246	NOG	7478	739	S	Transferase	Yes
ENOG410XS0P	3.33797	-1.42964	0.525765	-2.71915	0.00654494	0.0432753	NOG	26124	701	S	leucine Rich Repeat	Yes
COG5391	3.32377	-2.86038	0.620514	-4.6097	4.03259e-06	0.000406619	NOG	967	210	S	transmembrane protein 63C	Yes
ENOG410XP1S	3.23941	-1.7745	0.610477	-2.90674	0.00365213	0.0292654	NOG	48	48	S	C2H2 finger domain protein	Yes
ENOG41121N2	3.14427	-3.65615	0.868773	-4.2084	2.57181e-05	0.00115255	NOG	977	117	S	copine family	Yes
COG1409	3.13802	-3.74018	0.846482	-4.4185	9.93905e-06	0.000670931	NOG	22	7	S	Arrestin (or S-antigen), N-terminal domain	Yes
ENOG411255K	3.09162	-3.5216	0.906201	-3.88611	0.000101862	0.00300616	NOG	5	4	S	CCT motif	Yes
COG2453	2.99439	-2.17667	0.781686	-2.78458	0.00535968	0.0376901	NOG	17	17	S	RTA1 like protein	Yes
ENOG41109MN	2.99243	-2.00595	0.613118	-3.27172	0.00106897	0.0134735	NOG	5633	408	S	Histone-lysine N-methyltransferase	Yes
COG0601	2.74615	1.97498	0.595804	3.31481	0.000917054	0.0126095	NOG	4	4	S		Yes
ENOG410YBNZ	2.70328	-2.23758	0.742577	-3.01327	0.00258449	0.0232432	NOG	133	83	S	1,3-beta-glucanosyltransferase	Yes
COG3791	2.67302	-1.90207	0.674805	-2.81869	0.00482197	0.0351481	NOG	782	217	S	Solute carrier family 44 member	Yes
ENOG410Y9AP	2.66347	-1.50477	0.56356	-2.67012	0.00758252	0.0468105	NOG	1419	222	S	solute carrier family 35 member	Yes
COG3485	2.63572	-1.92264	0.670503	-2.86746	0.00413775	0.0318897	NOG	3416	1303	S	Hydrolyzes cAMP to 5'-AMP. Plays an important regulatory role in modulating the intracellular concentration of cAMP, thereby influencing cAMP-dependent processes (By similarity)	Yes
COG5210	2.59533	-2.52405	0.803928	-3.13965	0.0016915	0.0182742	NOG	5	4	S		Yes
COG5159	2.47798	-1.88992	0.594045	-3.18144	0.00146545	0.016602	NOG	291	206	S	Slowmo homolog	Yes
ENOG410XRWH	2.4539	-1.69912	0.587911	-2.89009	0.00385126	0.0304577	NOG	1571	581	S	Glutathione-dependent formaldehyde-activating Gfa	Yes
COG0263	2.34697	-2.16689	0.727737	-2.97757	0.00290544	0.0252977	NOG	3	3	S		Yes
ENOG41109HZ	2.29137	-1.90587	0.606791	-3.1409	0.00168432	0.0182742	NOG	3241	238	S	TBC1 domain family member	Yes
COG2340	2.09108	-2.97992	0.866623	-3.43854	0.00058486	0.00936974	NOG	4	4	S		Yes
ENOG4111NW7	2.07523	-1.95671	0.658306	-2.97234	0.00295537	0.0253617	NOG	3193	791	S	Scp-like extracellular	Yes
ENOG410ZN2X	1.9688	-3.3641	0.78779	-4.2703	1.95207e-05	0.000944801	NOG	69	56	S	C2 domain-containing protein	Yes
COG1262	1.91931	-2.03412	0.683701	-2.97516	0.00292832	0.0253091	NOG	2146	957	S	Sulphatase-modifying factor protein	Yes
COG5028	1.89641	-1.9426	0.695711	-2.79226	0.00523415	0.0372549	NOG	1814	1082	S	O-methyltransferase	Yes
COG4122	1.83248	-2.67418	0.840695	-3.18091	0.00146811	0.016602	NOG	4	4	S	PB1 domain	Yes
COG1269	1.79448	-2.91573	0.735974	-3.96174	7.44068e-05	0.00225081	NOG	77	34	S	Sulfatase domain protein	Yes
ENOG410XNTS	1.75046	-2.83007	0.927062	-3.05273	0.00226771	0.0219515	NOG	5	4	S		Yes
COG2838	1.74418	-1.83538	0.647251	-2.83564	0.00457333	0.0339896	NOG	3881	498	S	2OGFe(II) oxygenase	Yes
ENOG41109UZ	1.69367	-2.51497	0.723391	-3.47664	0.000507744	0.00841603	NOG	431	193	S	peroxisomal membrane protein	Yes
ENOG41109X8	1.69005	-2.57363	0.677381	-3.79938	0.000145056	0.00365662	NOG	12012	219	S	Pentatricopeptide repeat-containing protein	Yes
COG5077	1.68219	-1.86778	0.710269	-2.62968	0.00854645	0.0498194	NOG	46	43	S	Conserved hypothetical, protein	Yes
ENOG41126JC	1.67446	-2.5985	0.901968	-2.88093	0.00396509	0.0309533	NOG	26	26	S	transcription factor	Yes
ENOG41109QX	1.56823	-2.48791	0.77988	-3.19012	0.00142213	0.0165459	NOG	636	155	S	capping protein (actin filament) gelsolin-like	Yes
COG3491	1.55599	-2.48208	0.738382	-3.36151	0.000775179	0.0111663	NOG	29	29	S	serine-threonine rich protein	Yes
ENOG410ZNC0	1.51515	-2.10775	0.794254	-2.65375	0.00796026	0.0484016	NOG	719	97	S	oligo-peptide transporter	Yes
ENOG410Z7Z7	1.49414	-2.10954	0.710851	-2.96763	0.00300106	0.0254974	NOG	1086	215	S	Domain-Containing protein	Yes
ENOG4111QEJ	1.4771	-2.96842	0.843696	-3.51835	0.000434241	0.00756588	NOG	32	31	S	Conserved hypothetical, protein	Yes
ENOG41102ZY	1.44292	-2.29052	0.747977	-3.06229	0.00219652	0.0214338	NOG	2019	219	S	F-box and leucine-rich repeat protein	Yes
ENOG410XRHN	1.42834	-2.14492	0.812221	-2.64081	0.00827091	0.0495436	NOG	109	71	S	1,3-beta-glucanosyltransferase gel2	Yes
ENOG410ZFIP	1.41519	-2.26663	0.814505	-2.78283	0.00538876	0.0376901	NOG	691	217	S	o-acyltransferase	Yes
ENOG410XR0A	1.35481	-2.43526	0.880816	-2.76478	0.00569607	0.0396106	NOG	71	65	S	GPI-anchored cell wall organization protein Ecm33	Yes
ENOG410ZDMK	1.35428	-2.60862	0.919745	-2.83625	0.00456473	0.0339896	NOG	4	4	S		Yes
COG5158	1.33663	-2.34104	0.888766	-2.63404	0.00843755	0.0498194	NOG	4	4	S		Yes
COG0133	1.32106	-2.46761	0.723032	-3.41286	0.000642851	0.00972312	NOG	833	195	S	NIPA-like domain containing	Yes
ENOG410XNZC	1.30347	-2.47675	0.848798	-2.91795	0.00352341	0.0284222	NOG	5	4	S		Yes
COG1597	1.2971	-2.68848	0.892519	-3.01224	0.00259325	0.0232432	NOG	9	6	S		Yes
ENOG4111XQR	1.2004	-2.6859	0.832662	-3.22568	0.00125675	0.0153602	NOG	628	225	S	Ankyrin Repeat	Yes
COG5038	1.13256	-2.51224	0.880131	-2.8544	0.00431182	0.0330209	NOG	66	31	S		Yes
ENOG410Y7NN	1.11118	-2.02174	0.769906	-2.62595	0.00864073	0.0498194	NOG	75	67	S	Conserved hypothetical, protein	Yes
ENOG410XRT8	1.0842	-2.44599	0.887795	-2.75513	0.00586679	0.0403342	NOG	422	218	S	GTP binding protein	Yes
ENOG410XQ54	1.06689	-2.29913	0.848929	-2.70827	0.00676356	0.0436903	NOG	14	7	S	whole genome shotgun sequence	Yes
ENOG410XSHQ	1.05444	-2.49532	0.841828	-2.96417	0.00303501	0.0254974	NOG	419	95	S	Dysferlin, limb girdle muscular dystrophy 2B (Autosomal recessive)	Yes
ENOG410XTG3	0.946888	-2.45169	0.805922	-3.04209	0.00234938	0.0220426	NOG	42	42	S	Conserved hypothetical, protein	Yes
ENOG410XNRX	0.916377	-2.35647	0.890596	-2.64595	0.0081463	0.0492645	NOG	257	229	S	Component of the cytosolic iron-sulfur (Fe S) protein assembly machinery. Required for the maturation of extramitochondrial Fe S proteins (By similarity). Has anti- apoptotic effects in the cell. Involved in negative control of H(2)O(2)-induced cell death, probably by tethering the pro- apoptotic factor tah18 in the cytoplasm in the absence of oxidative stress (By similarity)	Yes
ENOG4111JI6	0.907504	-2.41051	0.85969	-2.80393	0.00504841	0.0361454	NOG	7	7	S		Yes
ENOG41109US	0.747076	-2.26214	0.82254	-2.75019	0.00595604	0.0404877	NOG	2280	879	S	type i phosphodiesterase nucleotide pyrophosphatase	Yes
ENOG4110AAX	0.728687	-2.21327	0.80634	-2.74483	0.00605414	0.0409246	NOG	21	21	S	SCP-2 sterol transfer family	Yes
ENOG410XNR8	26.4371	-2.41633	0.396158	-6.09942	1.06457e-09	1.28813e-06	NOG	36005	1484	T	Serine Threonine protein kinase	Yes
ENOG4110ABQ	12.3398	-1.61478	0.44063	-3.6647	0.000247633	0.00494032	NOG	4380	243	T	calcium-dependent protein kinase	Yes
ENOG410XRI2	12.1468	-1.29053	0.418623	-3.0828	0.00205066	0.0205066	NOG	3313	237	T	protein serine/threonine kinase activity	Yes
ENOG410Z906	8.4229	-1.74357	0.452819	-3.85048	0.000117886	0.00325873	NOG	6407	1256	T	Phosphatase	Yes
ENOG410XS4S	5.95865	-1.61885	0.535332	-3.02402	0.00249441	0.0227509	NOG	1467	239	T	phosphatidylinositol-4-phosphate 5-kinase	Yes
ENOG410XSI5	3.73265	1.51713	0.563159	2.69396	0.00706076	0.0442118	NOG	8211	1346	T	Two component transcriptional regulator, LuxR family	Yes
COG5260	2.60236	-2.27122	0.693035	-3.27721	0.00104838	0.0133531	NOG	4121	455	T	dual specificity phosphatase	Yes
ENOG410XQVI	1.46403	-2.79516	0.761121	-3.67242	0.000240263	0.00494032	NOG	369	227	T	3phosphoinositidedependent protein kinase	Yes
ENOG410XRI7	1.41328	-2.49919	0.853029	-2.92978	0.00339203	0.027546	NOG	382	108	T	calcium calmodulin-dependent protein kinase	Yes
ENOG410XUCG	1.23109	-2.15924	0.801796	-2.693	0.00708123	0.0442118	NOG	526	235	T	(Regulatory) subunit	Yes
ENOG4111Q5U	1.20757	-2.52426	0.813489	-3.103	0.00191568	0.0198117	NOG	1441	208	T	Phosphodiesterase	Yes
ENOG410XR54	4.87523	-1.4298	0.453052	-3.15593	0.00159986	0.0175985	NOG	526	202	U	voltage-dependent anion channel	Yes
ENOG410ZVDQ	4.08624	-2.52268	0.661056	-3.81614	0.000135555	0.00356568	NOG	858	235	U	Vacuolar Protein	Yes
ENOG410YHTD	3.31081	-1.91634	0.606664	-3.15882	0.00158407	0.0175846	NOG	978	220	U	receptor accessory protein	Yes
ENOG410YQ2G	2.66893	-2.69166	0.614787	-4.37819	1.19667e-05	0.000670931	NOG	1303	218	U	sorting nexin	Yes
COG5258	1.97043	-2.58124	0.76228	-3.3862	0.000708665	0.0104571	NOG	277	160	U	translocase of inner mitochondrial membrane 21 homolog (yeast)	Yes
ENOG410XPQ6	1.9127	-2.2033	0.671977	-3.27883	0.0010424	0.0133531	NOG	758	238	U	SEC24 family, member	Yes
ENOG410XWMU	1.53128	-2.27738	0.670084	-3.39864	0.000677208	0.0101163	NOG	1372	237	U	Vacuolar Protein	Yes
ENOG410XPT2	1.2644	-2.67308	0.859901	-3.10859	0.00187983	0.0196086	NOG	601	99	U	Anoctamin	Yes
ENOG410XPH3	1.1259	-2.21857	0.752502	-2.94826	0.00319571	0.026485	NOG	480	206	U	Niemann-Pick disease type C1	Yes
ENOG410XPSE	1.07875	-2.19025	0.763466	-2.86883	0.0041199	0.0318897	NOG	339	235	U	attachment protein	Yes
ENOG410XRCA	0.992201	-2.44111	0.859178	-2.84121	0.0044942	0.0339874	NOG	1908	129	U	Potassium voltage-gated channel, subfamily H (Eag-related), member	Yes
COG0676	0.989386	-2.38613	0.895354	-2.66501	0.00769861	0.0472859	NOG	556	206	U	ATPase (type	Yes
COG5656	21.7345	-1.62968	0.405408	-4.01987	5.82314e-05	0.00191772	NOG	15084	1893	V	(ABC) transporter	Yes
ENOG4111S0Y	15.218	-1.70897	0.338447	-5.04947	4.43044e-07	8.93471e-05	NOG	6472	1603	V	(ABC) transporter	Yes
COG5050	3.35862	1.37101	0.509165	2.69266	0.0070885	0.0442118	NOG	4886	1484	V	ABC transporter (permease)	Yes
COG5560	79.7921	1.31114	0.321502	4.07817	4.5391e-05	0.00177172	NOG	3578	239	Z	Actin-related protein	Yes
COG5636	15.3991	-1.58392	0.375633	-4.21667	2.4794e-05	0.00115255	NOG	4528	236	Z	myosin heavy chain	Yes
ENOG4110WWP	5.72863	-1.69487	0.453398	-3.73814	0.000185388	0.00407853	NOG	3832	221	Z	Microtubule associated monoxygenase, calponin and LIM domain containing	Yes
COG1524	4.31271	-2.43297	0.55589	-4.37672	1.2048e-05	0.000670931	NOG	2562	215	Z	heavy chain	Yes
ENOG4111X3D	4.1229	-2.59726	0.529105	-4.90879	9.16413e-07	0.000123207	NOG	7141	238	Z	Kinesin family member	Yes
COG0002	1.26813	-0.243767	0.704835	-0.34585	0.729456	0.837421	NOG	1641	1500	E	N-acetylglutamate semialdehyde dehydrogenase	No
COG0003	1.6146	-0.388683	0.601925	-0.645732	0.518453	0.676	NOG	1137	650	P	ATPase required for the post-translational delivery of tail-anchored (TA) proteins to the endoplasmic reticulum. Recognizes and selectively binds the transmembrane domain of TA proteins in the cytosol. This complex then targets to the endoplasmic reticulum by membrane-bound receptors, where the tail- anchored protein is released for insertion. This process is regulated by ATP binding and hydrolys…	No
COG0004	2.46901	-0.40562	0.62714	-0.646777	0.517776	0.675846	NOG	987	387	P	ammonium Transporter	No
COG0005	0.969432	-1.86991	0.811882	-2.30317	0.0212691	0.0855003	NOG	1852	1330	F	The purine nucleoside phosphorylases catalyze the phosphorolytic breakdown of the N-glycosidic bond in the beta- (deoxy)ribonucleoside molecules, with the formation of the corresponding free purine bases and pentose-1-phosphate (By similarity)	No
COG0006	2.03859	-0.10305	0.592638	-0.173884	0.861957	0.919724	NOG	4754	1995	E	peptidase M24	No
COG0007	2.2601	-0.632908	0.725889	-0.871908	0.383258	0.558054	NOG	2013	1314	H	Multifunctional enzyme that catalyzes the SAM-dependent methylation of uroporphyrinogen III at position C-2 and C-7 to form precorrin-2 and then position C-12 or C-18 to form trimethylpyrrocorphin 2. It also catalyzes the conversion of precorrin-2 into siroheme. This reaction consists of the NAD- dependent oxidation of precorrin-2 into sirohydrochlorin and its subsequent ferrochelation into siroh…	No
COG0008	4.00284	-0.0282175	0.522065	-0.0540498	0.956895	0.977908	NOG	4412	2024	J	Catalyzes the attachment of glutamate to tRNA(Glu) in a two-step reaction glutamate is first activated by ATP to form Glu-AMP and then transferred to the acceptor end of tRNA(Glu) (By similarity)	No
COG0010	4.24581	0.0581342	0.598732	0.0970955	0.922651	0.959324	NOG	2438	1271	E	hydrolase activity, acting on carbon-nitrogen (but not peptide) bonds, in linear amidines	No
COG0012	3.14414	0.358182	0.547082	0.654714	0.512652	0.672057	NOG	2316	2008	J	gtp-binding protein	No
COG0013	2.73774	-0.356521	0.575691	-0.619291	0.535724	0.68923	NOG	2315	2012	J	Catalyzes the attachment of alanine to tRNA(Ala) in a two-step reaction alanine is first activated by ATP to form Ala- AMP and then transferred to the acceptor end of tRNA(Ala). Also edits incorrectly charged Ser-tRNA(Ala) and Gly-tRNA(Ala) via its editing domain (By similarity)	No
COG0014	2.37928	-1.1533	0.586617	-1.96603	0.0492956	0.143732	NOG	1704	1556	E	Catalyzes the NADPH dependent reduction of L-gamma- glutamyl 5-phosphate into L-glutamate 5-semialdehyde and phosphate. The product spontaneously undergoes cyclization to form 1-pyrroline-5-carboxylate (By similarity)	No
COG0015	2.73552	0.530961	0.568017	0.934762	0.349911	0.529817	NOG	2362	1914	F	adenylosuccinate lyase	No
COG0016	2.05304	0.644318	0.487918	1.32055	0.186653	0.347461	NOG	2350	2020	J	phenylalanyL-tRNA synthetase, alpha subunit	No
COG0017	3.94648	-1.44459	0.552023	-2.61691	0.00887305	0.0506402	NOG	2161	1291	J	asparaginyl-tRNA synthetase	No
COG0018	1.95186	0.613122	0.678031	0.904267	0.365854	0.546522	NOG	2389	2014	J	arginyL-tRNA synthetase	No
COG0019	4.05634	-0.388699	0.444796	-0.873881	0.382183	0.55783	NOG	3398	1817	E	Specifically catalyzes the decarboxylation of meso- diaminopimelate (meso-DAP) to L-lysine (By similarity)	No
COG0020	2.42378	-0.115281	0.539154	-0.213817	0.830689	0.899852	NOG	2614	1963	I	Catalyzes the condensation of isopentenyl diphosphate (IPP) with allylic pyrophosphates generating different type of terpenoids (By similarity)	No
COG0021	7.49023	0.202834	0.316401	0.641064	0.521481	0.677757	NOG	2241	1599	G	Transketolase	No
COG0022	3.70377	0.196044	0.48394	0.405101	0.685404	0.803622	NOG	2422	1238	C	Dehydrogenase, E1 component	No
COG0023	5.03548	0.357909	0.397928	0.89943	0.368423	0.549133	NOG	1189	749	J	translation initiation factor	No
COG0024	4.26114	-1.01285	0.40759	-2.48498	0.0129557	0.0637254	NOG	3645	2016	J	Removes the N-terminal methionine from nascent proteins (By similarity)	No
COG0025	2.01917	-1.27876	0.560761	-2.2804	0.0225838	0.0892004	NOG	3298	1237	P	Sodium hydrogen exchanger	No
COG0028	4.47351	0.356979	0.423993	0.841946	0.399818	0.572956	NOG	5016	1744	E	acetolactate synthase	No
COG0029	1.72394	-0.795294	0.790721	-1.00578	0.314519	0.489792	NOG	1158	1114	H	L-aspartate oxidase	No
COG0031	3.03127	-0.224039	0.459767	-0.487287	0.626055	0.754025	NOG	4199	1801	E	cysteine biosynthetic process from serine	No
COG0033	6.06017	-1.02344	0.436112	-2.34674	0.0189384	0.0790188	NOG	935	781	G	phosphoglucomutase	No
COG0035	1.54455	-0.759442	0.595251	-1.27583	0.202014	0.365924	NOG	2331	1626	F	Catalyzes the conversion of uracil and 5-phospho-alpha- D-ribose 1-diphosphate (PRPP) to UMP and diphosphate (By similarity)	No
COG0037	1.95868	-1.13754	0.628585	-1.80969	0.0703439	0.185438	NOG	3440	1986	D	Ligates lysine onto the cytidine present at position 34 of the AUA codon-specific tRNA(Ile) that contains the anticodon CAU, in an ATP-dependent manner. Cytidine is converted to lysidine, thus changing the amino acid specificity of the tRNA from methionine to isoleucine (By similarity)	No
COG0038	2.90935	-1.38407	0.570552	-2.42584	0.0152728	0.0698503	NOG	3149	1407	P	chloride channel	No
COG0039	9.63093	-0.0125554	0.41543	-0.0302226	0.97589	0.986488	NOG	3492	1734	C	Catalyzes the reversible oxidation of malate to oxaloacetate (By similarity)	No
COG0042	3.1785	0.402946	0.534674	0.753629	0.451072	0.621636	NOG	3760	1884	J	Catalyzes the synthesis of dihydrouridine a modified base found in the D-loop of most tRNAs (By similarity)	No
COG0044	3.35973	-0.369619	0.588626	-0.627935	0.530047	0.68521	NOG	3076	1699	F	Dihydroorotase	No
COG0045	7.68889	-0.509879	0.331223	-1.53939	0.12371	0.268208	NOG	2047	1420	C	Succinyl-CoA synthetase subunit beta	No
COG0046	3.49012	0.435413	0.49432	0.880833	0.378408	0.555673	NOG	1937	1829	F	phosphoribosylformylglycinamidine synthase	No
COG0047	3.12749	0.543964	0.569267	0.955552	0.339299	0.518373	NOG	1887	1827	F	phosphoribosylformylglycinamidine synthase	No
COG0049	28.847	0.842339	0.321898	2.61678	0.00887623	0.0506402	NOG	2420	2002	J	One of the primary rRNA binding proteins, it binds directly to 16S rRNA where it nucleates assembly of the head domain of the 30S subunit. Is located at the subunit interface close to the decoding center, probably blocks exit of the E-site tRNA (By similarity)	No
COG0050	5.05687	0.870996	0.368686	2.36243	0.0181554	0.0765435	NOG	2820	1883	J	This protein promotes the GTP-dependent binding of aminoacyl-tRNA to the A-site of ribosomes during protein biosynthesis (By similarity)	No
COG0051	14.9181	0.767118	0.316814	2.42135	0.015463	0.0698503	NOG	2346	2000	J	tRNA binding	No
COG0052	18.0182	0.336489	0.31835	1.05698	0.290521	0.465603	NOG	2559	2022	J	30S ribosomal protein S2	No
COG0053	1.72983	-0.811442	0.623672	-1.30107	0.193234	0.353726	NOG	2640	1635	P	cation diffusion facilitator family transporter	No
COG0054	1.44738	-1.0633	0.607426	-1.7505	0.0800315	0.202544	NOG	1755	1610	H	Catalyzes the formation of 6,7-dimethyl-8- ribityllumazine by condensation of 5-amino-6-(D- ribitylamino)uracil with 3,4-dihydroxy-2-butanone 4-phosphate. This is the penultimate step in the biosynthesis of riboflavin (By similarity)	No
COG0055	32.6147	0.48968	0.277741	1.76308	0.077887	0.198407	NOG	2154	1793	C	Produces ATP from ADP in the presence of a proton gradient across the membrane. The catalytic sites are hosted primarily by the beta subunits (By similarity)	No
COG0056	18.8382	0.439681	0.336184	1.30786	0.190921	0.352997	NOG	2071	1790	C	Produces ATP from ADP in the presence of a proton gradient across the membrane. The alpha chain is a regulatory subunit (By similarity)	No
COG0058	5.4918	0.766214	0.378167	2.02612	0.0427521	0.131295	NOG	1981	1348	G	Phosphorylase is an important allosteric enzyme in carbohydrate metabolism. Enzymes from different sources differ in their regulatory mechanisms and in their natural substrates. However, all known phosphorylases share catalytic and structural properties (By similarity)	No
COG0059	5.83337	0.677548	0.327187	2.07083	0.0383751	0.121874	NOG	1659	1564	E	Alpha-keto-beta-hydroxylacyl reductoisomerase	No
COG0060	4.02323	0.359497	0.496184	0.724525	0.468744	0.63514	NOG	2427	2013	J	amino acids such as valine, to avoid such errors it has two additional distinct tRNA(Ile)-dependent editing activities. One activity is designated as 'pretransfer' editing and involves the hydrolysis of activated Val-AMP. The other activity is designated 'posttransfer' editing and involves deacylation of mischarged Val-tRNA(Ile) (By similarity)	No
COG0061	1.18081	0.96857	0.706286	1.37136	0.170264	0.328579	NOG	2385	1940	G	Catalyzes the phosphorylation of NAD to NADP. Utilizes ATP and other nucleoside triphosphates as well as inorganic polyphosphate as a source of phosphorus (By similarity)	No
COG0065	2.64546	0.558772	0.468151	1.19357	0.232646	0.403297	NOG	1931	1539	E	Catalyzes the isomerization between 2-isopropylmalate and 3-isopropylmalate, via the formation of 2-isopropylmaleate (By similarity)	No
COG0066	1.6688	-0.0573355	0.588027	-0.0975049	0.922325	0.959324	NOG	1902	1537	E	Catalyzes the isomerization between 2-isopropylmalate and 3-isopropylmalate, via the formation of 2-isopropylmaleate (By similarity)	No
COG0067	5.74253	-0.0556523	0.394328	-0.141132	0.887766	0.938163	NOG	1664	1361	E	glutamate synthase	No
COG0069	6.91659	-0.0759716	0.383897	-0.197896	0.843127	0.906026	NOG	2295	1414	E	glutamate synthase	No
COG0070	5.9801	-0.201974	0.386095	-0.523119	0.600891	0.734423	NOG	1630	1353	E	glutamate synthase	No
COG0072	2.10678	0.277032	0.519407	0.533362	0.593783	0.727941	NOG	2393	2015	J	phenylalanyl-tRNA synthetase (beta subunit)	No
COG0073	4.67304	0.110225	0.54537	0.202111	0.83983	0.905641	NOG	3982	2007	J	Is required not only for elongation of protein synthesis but also for the initiation of all mRNA translation through initiator tRNA(fMet) aminoacylation (By similarity)	No
COG0074	10.4659	0.376795	0.30005	1.25577	0.209199	0.376683	NOG	2015	1436	C	Succinyl-CoA ligase ADP-forming subunit alpha	No
COG0075	1.21525	-1.11279	0.767432	-1.45002	0.147054	0.300059	NOG	1716	1169	E	aminotransferase	No
COG0079	2.15842	0.385129	0.525015	0.733558	0.463218	0.631161	NOG	3303	1645	E	Imidazole acetol-phosphate transaminase	No
COG0080	16.2489	0.133317	0.252747	0.527472	0.597866	0.731464	NOG	2550	2012	J	This protein binds directly to 23S ribosomal RNA (By similarity)	No
COG0081	22.4912	0.166248	0.269069	0.617865	0.536664	0.68923	NOG	2435	2007	J	Binds directly to 23S rRNA. The L1 stalk is quite mobile in the ribosome, and is involved in E site tRNA release (By similarity)	No
COG0084	1.624	0.957294	0.729767	1.31178	0.189594	0.351316	NOG	3207	1980	L	tatd family	No
COG0085	9.12366	0.743807	0.341353	2.179	0.0293319	0.102874	NOG	2889	2013	K	DNA-dependent RNA polymerase catalyzes the transcription of DNA into RNA using the four ribonucleoside triphosphates as substrates (By similarity)	No
COG0087	33.8353	0.483282	0.230848	2.09351	0.0363035	0.117637	NOG	2511	2016	J	One of the primary rRNA binding proteins, it binds directly near the 3'-end of the 23S rRNA, where it nucleates assembly of the 50S subunit (By similarity)	No
COG0088	15.1733	-0.325346	0.319462	-1.01842	0.308479	0.484124	NOG	2406	2018	J	One of the primary rRNA binding proteins, this protein initially binds near the 5'-end of the 23S rRNA. It is important during the early stages of 50S assembly. It makes multiple contacts with different domains of the 23S rRNA in the assembled 50S subunit and ribosome (By similarity)	No
COG0089	10.635	-0.168231	0.288268	-0.583592	0.559495	0.704607	NOG	2411	1983	J	One of the early assembly proteins it binds 23S rRNA. One of the proteins that surrounds the polypeptide exit tunnel on the outside of the ribosome. Forms the main docking site for trigger factor binding to the ribosome (By similarity)	No
COG0090	30.476	0.528606	0.252706	2.09178	0.0364578	0.117637	NOG	2464	2023	J	One of the primary rRNA binding proteins. Required for association of the 30S and 50S subunits to form the 70S ribosome, for tRNA binding and peptide bond formation. It has been suggested to have peptidyltransferase activity	No
COG0091	13.7923	-0.267738	0.456117	-0.586995	0.557207	0.70443	NOG	2491	2017	J	The globular domain of the protein is located near the polypeptide exit tunnel on the outside of the subunit, while an extended beta-hairpin is found that lines the wall of the exit tunnel in the center of the 70S ribosome (By similarity)	No
COG0092	21.0874	0.864898	0.335673	2.57661	0.00997754	0.0546282	NOG	2212	2021	J	Binds the lower part of the 30S subunit head. Binds mRNA in the 70S ribosome, positioning it for translation (By similarity)	No
COG0093	17.9802	0.758077	0.326214	2.32386	0.020133	0.0823004	NOG	2347	2016	J	Binds to 23S rRNA. Forms part of two intersubunit bridges in the 70S ribosome (By similarity)	No
COG0094	21.2146	0.223025	0.260269	0.8569	0.3915	0.564767	NOG	2293	2012	J	This is 1 of the proteins that binds and probably mediates the attachment of the 5S RNA into the large ribosomal subunit, where it forms part of the central protuberance. In the 70S ribosome it contacts protein S13 of the 30S subunit (bridge B1b), connecting the 2 subunits	No
COG0096	16.611	0.589017	0.227717	2.58661	0.00969242	0.0537974	NOG	2373	2022	J	One of the primary rRNA binding proteins, it binds directly to 16S rRNA central domain where it helps coordinate assembly of the platform of the 30S subunit (By similarity)	No
COG0097	14.7266	0.601674	0.263939	2.27959	0.0226318	0.0892004	NOG	2379	2020	J	This protein binds to the 23S rRNA, and is important in its secondary structure. It is located near the subunit interface in the base of the L7 L12 stalk, and near the tRNA binding site of the peptidyltransferase center (By similarity)	No
COG0098	20.9352	0.366524	0.255587	1.43405	0.151558	0.306152	NOG	2542	2018	J	Located at the back of the 30S subunit body where it stabilizes the conformation of the head with respect to the body (By similarity)	No
COG0100	15.0166	0.796749	0.321111	2.48123	0.0130931	0.0638816	NOG	2455	2016	J	Located on the platform of the 30S subunit, it bridges several disparate RNA helices of the 16S rRNA. Forms part of the Shine-Dalgarno cleft in the 70S ribosome (By similarity)	No
COG0102	11.3651	0.243477	0.284193	0.856732	0.391593	0.564767	NOG	2450	2015	J	This protein is one of the early assembly proteins of the 50S ribosomal subunit, although it is not seen to bind rRNA by itself. It is important during the early stages of 50S assembly (By similarity)	No
COG0103	12.1246	0.682954	0.330405	2.06702	0.038732	0.122685	NOG	2403	2010	J	30S ribosomal protein S9	No
COG0104	2.83819	0.0367553	0.561847	0.0654187	0.947841	0.972763	NOG	2157	1912	F	Plays an important role in the de novo pathway of purine nucleotide biosynthesis	No
COG0108	2.13693	-0.333002	0.593221	-0.561345	0.574562	0.712316	NOG	1955	1599	H	Catalyzes the conversion of D-ribulose 5-phosphate to formate and 3,4-dihydroxy-2-butanone 4-phosphate (By similarity)	No
COG0110	1.38834	0.936991	0.730183	1.28323	0.199412	0.362927	NOG	4075	1499	S	acetyltransferase	No
COG0111	1.5889	-0.589654	0.585732	-1.0067	0.314081	0.489739	NOG	4836	1758	E	Dehydrogenase	No
COG0112	4.36162	0.164426	0.411395	0.399678	0.689394	0.806737	NOG	2651	1928	E	Catalyzes the reversible interconversion of serine and glycine with tetrahydrofolate (THF) serving as the one-carbon carrier. This reaction serves as the major source of one-carbon groups required for the biosynthesis of purines, thymidylate, methionine, and other important biomolecules. Also exhibits THF- independent aldolase activity toward beta-hydroxyamino acids, producing glycine and aldehyd…	No
COG0113	2.31096	-0.0790846	0.542247	-0.145846	0.884043	0.935045	NOG	1634	1550	H	delta-aminolevulinic acid dehydratase	No
COG0114	4.16275	0.710312	0.414574	1.71335	0.0866474	0.212234	NOG	1421	1294	C	fumarate hydratase class II	No
COG0115	2.25789	-0.323749	0.499365	-0.64832	0.516778	0.675271	NOG	4325	1827	E	brancheD-chain amino acid aminotransferase	No
COG0119	5.74082	0.262246	0.407101	0.644178	0.51946	0.676584	NOG	4366	1680	E	Catalyzes the condensation of the acetyl group of acetyl-CoA with 3-methyl-2-oxobutanoate (2-oxoisovalerate) to form 3-carboxy-3-hydroxy-4-methylpentanoate (2-isopropylmalate) (By similarity)	No
COG0123	1.77155	-1.31281	0.622099	-2.1103	0.0348329	0.114713	NOG	3227	1122	BQ	Histone deacetylase	No
COG0124	1.30921	-0.371691	0.679574	-0.546947	0.584415	0.71864	NOG	2515	2016	J	Histidyl-trna synthetase	No
COG0126	5.10638	0.917108	0.38564	2.37814	0.0174001	0.0738742	NOG	2267	2006	G	phosphoglycerate kinase	No
COG0128	1.43171	-0.507734	0.652823	-0.777751	0.436716	0.607386	NOG	1869	1748	E	5-enolpyruvylshikimate-3-phosphate synthase	No
COG0129	2.92695	0.41269	0.468093	0.881641	0.377971	0.555673	NOG	2823	1566	E	Dihydroxy-acid dehydratase	No
COG0130	2.22283	-0.2425	0.546814	-0.443478	0.65742	0.781413	NOG	2250	1976	J	Responsible for synthesis of pseudouridine from uracil- 55 in the psi GC loop of transfer RNAs (By similarity)	No
COG0136	1.37371	0.840711	0.628136	1.33842	0.180759	0.340974	NOG	2130	1806	E	Catalyzes the NADPH-dependent formation of L-aspartate- semialdehyde (L-ASA) by the reductive dephosphorylation of L- aspartyl-4-phosphate (By similarity)	No
COG0137	2.86845	-0.288804	0.496727	-0.581412	0.560963	0.704852	NOG	1805	1687	E	Citrulline--aspartate ligase	No
COG0138	2.25075	0.375059	0.511862	0.732734	0.463721	0.631161	NOG	2006	1790	F	bifunctional purine biosynthesis protein PURH	No
COG0142	2.55232	-0.889772	0.600523	-1.48166	0.13843	0.287802	NOG	4797	1982	H	synthase	No
COG0143	3.37052	0.0172731	0.556311	0.0310493	0.97523	0.986488	NOG	2422	2019	J	Is required not only for elongation of protein synthesis but also for the initiation of all mRNA translation through initiator tRNA(fMet) aminoacylation (By similarity)	No
COG0144	2.29832	-0.343722	0.570946	-0.602023	0.547159	0.696908	NOG	3788	1807	J	nOP2 Sun	No
COG0147	2.41504	0.694423	0.525131	1.32238	0.186042	0.346967	NOG	3076	1599	E	synthase (Component I)	No
COG0149	4.12367	0.261726	0.407014	0.643041	0.520198	0.676816	NOG	2368	2001	G	triosephosphate isomerase	No
COG0150	0.865294	-0.819268	0.788207	-1.03941	0.298616	0.473445	NOG	1910	1837	F	phosphoribosylaminoimidazole synthetase	No
COG0151	1.45288	-0.404146	0.649772	-0.621981	0.533954	0.68923	NOG	1969	1845	F	Phosphoribosylglycinamide synthetase	No
COG0153	1.33202	0.437292	0.778725	0.561549	0.574423	0.712316	NOG	1314	991	G	Catalyzes the transfer of the gamma-phosphate of ATP to D-galactose to form alpha-D-galactose-1-phosphate (Gal-1-P) (By similarity)	No
COG0154	3.64143	-0.275775	0.475452	-0.580027	0.561896	0.705285	NOG	5796	1733	J	Allows the formation of correctly charged Gln-tRNA(Gln) through the transamidation of misacylated Glu-tRNA(Gln) in organisms which lack glutaminyl-tRNA synthetase. The reaction takes place in the presence of glutamine and ATP through an activated gamma-phospho-Glu-tRNA(Gln) (By similarity)	No
COG0155	2.91392	0.714116	0.547495	1.30433	0.19212	0.353291	NOG	1484	1047	C	Component of the sulfite reductase complex that catalyzes the 6-electron reduction of sulfite to sulfide. This is one of several activities required for the biosynthesis of L- cysteine from sulfate (By similarity)	No
COG0156	4.58839	-0.81425	0.413159	-1.97079	0.0487479	0.142821	NOG	3436	1442	H	8-Amino-7-oxononanoate synthase	No
COG0158	2.84842	-0.908406	0.531653	-1.70864	0.0875168	0.212641	NOG	1173	865	G	D-fructose-1,6-bisphosphate 1-phosphohydrolase class 1	No
COG0160	2.46986	0.806011	0.523868	1.53858	0.123908	0.268208	NOG	2449	1054	E	transaminase activity	No
COG0162	1.11331	-0.159579	0.741746	-0.215139	0.829659	0.899617	NOG	2443	2018	J	Catalyzes the attachment of tyrosine to tRNA(Tyr) in a two-step reaction tyrosine is first activated by ATP to form Tyr- AMP and then transferred to the acceptor end of tRNA(Tyr) (By similarity)	No
COG0165	3.05583	-0.0748159	0.438077	-0.170783	0.864395	0.921026	NOG	1846	1673	E	argininosuccinate lyase	No
COG0166	3.49848	0.117262	0.594523	0.197237	0.843642	0.906026	NOG	2216	1918	G	glucose-6-phosphate isomerase activity	No
COG0167	0.840664	0.285696	0.861043	0.331802	0.740039	0.845559	NOG	2613	1906	F	Catalyzes the conversion of dihydroorotate to orotate	No
COG0168	1.73069	0.0885979	0.595956	0.148665	0.881818	0.933508	NOG	2418	1451	P	Low-affinity potassium transport system. Interacts with Trk system potassium uptake protein TrkA (By similarity)	No
COG0169	1.8171	0.463967	0.667057	0.695543	0.486715	0.65291	NOG	2447	1747	E	shikimate dehydrogenase	No
COG0170	0.267985	-0.803164	1.04175	-0.770978	0.44072		NOG	610	414	I	phosphatidate Cytidylyltransferase	No
COG0172	3.82984	1.13141	0.474805	2.38289	0.0171773	0.0734436	NOG	2470	2020	J	Catalyzes the attachment of serine to tRNA(Ser). Is also able to aminoacylate tRNA(Sec) with serine, to form the misacylated tRNA L-seryl-tRNA(Sec), which will be further converted into selenocysteinyl-tRNA(Sec) (By similarity)	No
COG0173	1.67163	0.0555229	0.689315	0.080548	0.935801	0.966143	NOG	1955	1852	J	aspartyl-trna synthetase	No
COG0174	25.4933	-0.214898	0.325128	-0.660963	0.508636	0.670778	NOG	3754	1769	E	glutamine synthetase	No
COG0175	1.93758	0.880877	0.64369	1.36848	0.171162	0.328678	NOG	2498	1313	P	Reduction of activated sulfate into sulfite (By similarity)	No
COG0176	5.59673	0.232388	0.352217	0.659787	0.50939	0.670778	NOG	2237	1640	G	Transaldolase is important for the balance of metabolites in the pentose-phosphate pathway (By similarity)	No
COG0180	1.92575	0.168702	0.60344	0.279568	0.779809	0.868049	NOG	2501	2022	J	tryptophanyltRNA synthetase	No
COG0186	22.0291	0.665778	0.31085	2.1418	0.0322097	0.108455	NOG	2249	1994	J	One of the primary rRNA binding proteins, it binds specifically to the 5'-end of 16S ribosomal	No
COG0187	4.47242	0.64105	0.392204	1.63448	0.102158	0.238007	NOG	3467	1953	L	DNA gyrase negatively supercoils closed circular double- stranded DNA in an ATP-dependent manner and also catalyzes the interconversion of other topological isomers of double-stranded DNA rings, including catenanes and knotted rings (By similarity)	No
COG0188	4.76459	0.648247	0.450788	1.43803	0.150425	0.305172	NOG	3452	1951	L	DNA gyrase negatively supercoils closed circular double- stranded DNA in an ATP-dependent manner and also catalyzes the interconversion of other topological isomers of double-stranded DNA rings, including catenanes and knotted rings (By similarity)	No
COG0190	1.86811	0.100744	0.591234	0.170396	0.864699	0.921026	NOG	2527	1906	H	Catalyzes the oxidation of 5,10- methylenetetrahydrofolate to 5,10-methenyltetrahydrofolate and then the hydrolysis of 5,10-methenyltetrahydrofolate to 10- formyltetrahydrofolate (By similarity)	No
COG0191	9.44848	0.229038	0.292064	0.784204	0.43292	0.605588	NOG	2400	1536	G	Aldolase	No
COG0192	7.26424	0.751883	0.33544	2.24148	0.0249949	0.0930745	NOG	2278	1875	H	Catalyzes the formation of S-adenosylmethionine from methionine and ATP	No
COG0197	23.3192	0.507871	0.2121	2.39448	0.0166439	0.0729677	NOG	2444	2025	J	Binds 23S rRNA and is also seen to make contacts with the A and possibly P site tRNAs (By similarity)	No
COG0198	6.5019	-0.449439	0.388248	-1.15761	0.247023	0.416672	NOG	2381	1995	J	One of the proteins that surrounds the polypeptide exit tunnel on the outside of the subunit (By similarity)	No
COG0199	5.10996	-1.00565	0.574096	-1.75171	0.0798236	0.202488	NOG	2475	1970	J	Binds 16S rRNA, required for the assembly of 30S particles and may also be responsible for determining the conformation of the 16S rRNA at the A site (By similarity)	No
COG0200	20.8699	0.604142	0.318518	1.89673	0.0578637	0.161356	NOG	2438	2016	J	Binds to the 23S rRNA (By similarity)	No
COG0201	7.29284	0.296503	0.365801	0.810559	0.417619	0.594493	NOG	2370	2013	U	The central subunit of the protein translocation channel SecYEG. Consists of two halves formed by TMs 1-5 and 6-10. These two domains form a lateral gate at the front which open onto the bilayer between TMs 2 and 7, and are clamped together by SecE at the back. The channel is closed by both a pore ring composed of hydrophobic SecY resides and a short helix (helix 2A) on the extracellular side of …	No
COG0202	2.70302	0.409624	0.553755	0.739721	0.459469	0.628912	NOG	2417	2016	K	DNA-dependent RNA polymerase catalyzes the transcription of DNA into RNA using the four ribonucleoside triphosphates as substrates (By similarity)	No
COG0204	4.67926	0.176561	0.503051	0.35098	0.725603	0.834582	NOG	6036	1881	I	Acyltransferase	No
COG0206	1.96216	0.977793	0.730559	1.33842	0.180761	0.340974	NOG	2124	1732	D	Essential cell division protein that forms a contractile ring structure (Z ring) at the future cell division site. The regulation of the ring assembly controls the timing and the location of cell division. One of the functions of the FtsZ ring is to recruit other cell division proteins to the septum to produce a new cell wall between the dividing cells. Binds GTP and shows GTPase activity (By sim…	No
COG0208	2.13273	1.12481	0.568662	1.97799	0.0479293	0.141106	NOG	1821	1412	F	Provides the precursors necessary for DNA synthesis. Catalyzes the biosynthesis of deoxyribonucleotides from the corresponding ribonucleotides (By similarity)	No
COG0209	3.70058	0.907359	0.444242	2.04249	0.0411029	0.127852	NOG	2533	1796	F	Provides the precursors necessary for DNA synthesis. Catalyzes the biosynthesis of deoxyribonucleotides from the corresponding ribonucleotides (By similarity)	No
COG0210	6.34246	0.584764	0.54524	1.07249	0.283501	0.45834	NOG	4343	1887	L	helicase	No
COG0214	3.91843	0.759895	0.448767	1.69329	0.0903994	0.21833	NOG	824	738	H	Involved in the production of pyridoxal phosphate, probably by incorporating ammonia into the pyridine ring (By similarity)	No
COG0215	2.27057	0.0252263	0.639239	0.0394631	0.968521	0.983562	NOG	2427	1994	J	Cysteinyl-tRNA synthetase	No
COG0221	11.0817	0.852364	0.407363	2.09239	0.0364034	0.117637	NOG	1777	1325	C	Pyrophosphate phospho-hydrolase	No
COG0222	1.34258	-0.0348989	0.747028	-0.046717	0.962739	0.981393	NOG	2011	1844	J	Seems to be the binding site for several of the factors involved in protein synthesis and appears to be essential for accurate translation (By similarity)	No
COG0224	4.89066	-0.283293	0.385007	-0.735813	0.461845	0.630607	NOG	2018	1794	C	Produces ATP from ADP in the presence of a proton gradient across the membrane. The gamma chain is believed to be important in regulating ATPase activity and the flow of protons through the CF(0) complex (By similarity)	No
COG0229	0.904925	-0.713007	0.764242	-0.932959	0.350841	0.529985	NOG	2200	1589	O	)-reductase	No
COG0231	11.1874	0.173691	0.301836	0.575449	0.564988	0.706235	NOG	2501	2003	J	Involved in peptide bond synthesis. Stimulates efficient translation and peptide-bond synthesis on native or reconstituted 70S ribosomes in vitro. Probably functions indirectly by altering the affinity of the ribosome for aminoacyl-tRNA, thus increasing their reactivity as acceptors for peptidyl transferase (By similarity)	No
COG0234	2.25838	-0.683321	0.551464	-1.2391	0.215307	0.383685	NOG	2263	1860	O	Binds to cpn60 in the presence of Mg-ATP and suppresses the ATPase activity of the latter (By similarity)	No
COG0236	1.62274	-0.188513	0.688637	-0.273748	0.784278	0.871302	NOG	3135	1784	I	Carrier of the growing fatty acid chain in fatty acid biosynthesis (By similarity)	No
COG0240	2.60771	1.02477	0.635307	1.61304	0.106737	0.242766	NOG	2187	1808	C	glycerol-3-phosphate dehydrogenase	No
COG0243	4.7805	1.39404	0.597175	2.3344	0.0195749	0.0811153	NOG	4342	1081	C	molybdopterin oxidoreductase	No
COG0244	17.8198	0.436443	0.306221	1.42526	0.154083	0.308676	NOG	2485	2005	J	50s ribosomal protein L10	No
COG0248	1.61955	0.847952	0.707554	1.19843	0.230751	0.401844	NOG	1980	1321	FP	ppx gppa phosphatase	No
COG0249	3.36606	0.562824	0.529411	1.06311	0.287731	0.462356	NOG	3248	1670	L	that it carries out the mismatch recognition step. This protein has a weak ATPase activity (By similarity)	No
COG0250	0.74054	0.480798	0.779353	0.616919	0.537288	0.68923	NOG	2122	1895	K	Participates in transcription elongation, termination and antitermination (By similarity)	No
COG0251	2.22231	-0.342915	0.595314	-0.576024	0.564599	0.706235	NOG	4516	1782	J	Endoribonuclease LPSP	No
COG0256	16.9014	0.329068	0.283977	1.15878	0.246545	0.416672	NOG	2214	2010	J	This is one of the proteins that binds and probably mediates the attachment of the 5S RNA into the large ribosomal subunit, where it forms part of the central protuberance (By similarity)	No
COG0258	3.15334	1.15831	0.472668	2.45058	0.0142627	0.0666328	NOG	3320	2009	L	Structure-specific nuclease with 5'-flap endonuclease and 5'-3' exonuclease activities involved in DNA replication and repair. During DNA replication, cleaves the 5'-overhanging flap structure that is generated by displacement synthesis when DNA polymerase encounters the 5'-end of a downstream Okazaki fragment. It enters the flap from the 5'-end and then tracks to cleave the flap base, leaving a …	No
COG0265	4.12225	0.347666	0.458489	0.758287	0.448279	0.619906	NOG	5414	1895	O	Serine protease	No
COG0277	8.67037	-0.736516	0.337705	-2.18095	0.0291873	0.102811	NOG	7752	1482	C	FAD linked oxidase domain protein	No
COG0278	1.39447	-0.732531	0.646237	-1.13353	0.25699	0.425442	NOG	1320	912	O	Glutaredoxin	No
COG0280	4.86603	0.856294	0.5009	1.70951	0.0873562	0.212641	NOG	2293	1406	C	phosphate acetyltransferase	No
COG0281	6.36453	0.0170057	0.477123	0.0356421	0.971568	0.983763	NOG	2801	1669	C	malic enzyme	No
COG0282	1.66468	0.567734	0.662162	0.857395	0.391227	0.564767	NOG	1711	1378	C	acetate kinase activity	No
COG0285	0.933729	-0.568424	0.714187	-0.795904	0.426088	0.600193	NOG	2288	1849	H	Folylpolyglutamate synthase	No
COG0288	1.32375	0.310644	0.604403	0.513968	0.607274	0.739165	NOG	2270	1347	P	carbonic anhydrase	No
COG0290	1.63474	0.398246	0.724309	0.549828	0.582437	0.716937	NOG	1832	1725	J	IF-3 binds to the 30S ribosomal subunit and shifts the equilibrum between 70S ribosomes and their 50S and 30S subunits in favor of the free subunits, thus enhancing the availability of 30S subunits on which protein synthesis initiation begins (By similarity)	No
COG0293	1.69273	-0.112718	0.668173	-0.168695	0.866036	0.92164	NOG	1507	970	J	Specifically methylates the uridine in position 2552 of 23S rRNA at the 2'-O position of the ribose in the fully assembled 50S ribosomal subunit (By similarity)	No
COG0296	8.64576	0.395693	0.523401	0.756004	0.449647	0.620379	NOG	1987	1281	G	Catalyzes the formation of the alpha-1,6-glucosidic linkages in glycogen by scission of a 1,4-alpha-linked oligosaccharide from growing alpha-1,4-glucan chains and the subsequent attachment of the oligosaccharide to the alpha-1,6 position (By similarity)	No
COG0304	5.48998	-0.196732	0.407515	-0.48276	0.629266	0.75462	NOG	4177	1794	I	Catalyzes the condensation reaction of fatty acid synthesis by the addition to an acyl acceptor of two carbons from malonyl-ACP (By similarity)	No
COG0306	2.42406	-0.0470772	0.611224	-0.0770212	0.938607	0.966147	NOG	1890	1272	P	inorganic phosphate transmembrane transporter activity	No
COG0307	1.97849	-1.32526	0.755561	-1.75401	0.0794294	0.201911	NOG	1644	1538	H	riboflavin synthase, subunit alpha	No
COG0308	6.31672	-0.120827	0.378963	-0.318836	0.749851	0.84955	NOG	4002	1304	E	aminopeptidase	No
COG0316	1.15725	-1.08161	0.767812	-1.4087	0.158925	0.313191	NOG	2692	1270	S	Iron--sulfur cluster	No
COG0317	3.4094	0.850551	0.598175	1.42191	0.155053	0.308848	NOG	2683	1693	KT	In eubacteria ppGpp (guanosine 3'-diphosphate 5-' diphosphate) is a mediator of the stringent response that coordinates a variety of cellular activities in response to changes in nutritional abundance (By similarity)	No
COG0318	13.3831	-0.288271	0.371328	-0.776326	0.437556	0.607857	NOG	11187	1607	IQ	Amp-dependent synthetase and ligase	No
COG0320	1.87848	0.531582	0.607321	0.87529	0.381416	0.557383	NOG	1615	1406	H	Catalyzes the radical-mediated insertion of two sulfur atoms into the C-6 and C-8 positions of the octanoyl moiety bound to the lipoyl domains of lipoate-dependent enzymes, thereby converting the octanoylated domains into lipoylated derivatives (By similarity)	No
COG0323	2.43896	0.576443	0.654361	0.880925	0.378358	0.555673	NOG	2304	1627	L	This protein is involved in the repair of mismatches in DNA. It is required for dam-dependent methyl-directed DNA mismatch repair. May act as a molecular matchmaker , a protein that promotes the formation of a stable complex between two or more DNA-binding proteins in an ATP-dependent manner without itself being part of a final effector complex (By similarity)	No
COG0329	3.1822	-0.304161	0.52134	-0.583422	0.559609	0.704607	NOG	3953	1850	E	Catalyzes the condensation of (S)-aspartate-beta- semialdehyde (S)-ASA and pyruvate to 4-hydroxy- tetrahydrodipicolinate (HTPA) (By similarity)	No
COG0330	6.60502	-0.59265	0.361407	-1.63984	0.101038	0.236472	NOG	5268	1802	O	Band 7 protein	No
COG0331	4.94327	-0.152041	0.461939	-0.329137	0.742052	0.846057	NOG	2383	1776	I	Malonyl coA-acyl carrier protein transacylase	No
COG0334	3.68965	0.411528	0.680991	0.604307	0.545639	0.695704	NOG	2479	1553	E	oxidoreductase activity, acting on the CH-NH2 group of donors, NAD or NADP as acceptor	No
COG0337	1.52903	-0.348279	0.58097	-0.599479	0.548854	0.697598	NOG	1847	1653	E	3-dehydroquinate synthase	No
COG0339	2.19014	-0.710058	0.596544	-1.19029	0.233934	0.40463	NOG	1728	1040	E	oligopeptidase a	No
COG0340	0.914669	-0.465996	0.758137	-0.614659	0.53878	0.68923	NOG	1994	1863	H	Biotin- acetyl-CoA-carboxylase ligase	No
COG0345	1.19732	-0.655509	0.716359	-0.915057	0.360162	0.539351	NOG	2254	1762	E	pyrroline-5-carboxylate reductase activity	No
COG0346	1.39244	0.824715	0.6795	1.21371	0.224859	0.39489	NOG	5528	1598	E	glyoxalase bleomycin resistance protein dioxygenase	No
COG0355	2.87467	-0.330198	0.525405	-0.628463	0.529701	0.68521	NOG	1714	1551	C	Produces ATP from ADP in the presence of a proton gradient across the membrane (By similarity)	No
COG0358	2.14711	1.279	0.796308	1.60617	0.108237	0.244342	NOG	2120	1779	L	DNA primase activity	No
COG0361	4.28533	0.955773	0.463871	2.06043	0.0393578	0.123782	NOG	2294	2000	J	however, it seems to stimulate more or less all the activities of the other two initiation factors, IF-2 and IF-3 (By similarity)	No
COG0362	10.7593	0.234076	0.320654	0.729994	0.465394	0.631308	NOG	1216	1025	G	Catalyzes the oxidative decarboxylation of 6- phosphogluconate to ribulose 5-phosphate and CO(2), with concomitant reduction of NADP to NADPH (By similarity)	No
COG0363	1.33421	-0.291837	0.673384	-0.433389	0.664732	0.786243	NOG	2463	1495	G	Catalyzes the reversible isomerization-deamination of glucosamine 6-phosphate (GlcN6P) to form fructose 6-phosphate (Fru6P) and ammonium ion (By similarity)	No
COG0364	4.80769	0.194706	0.37367	0.521063	0.602323	0.73543	NOG	1784	1283	G	Glucose-6-phosphate 1-dehydrogenase	No
COG0366	4.8579	-0.0406522	0.470761	-0.0863542	0.931185	0.964199	NOG	5803	1458	G	alpha amylase, catalytic	No
COG0367	1.80355	-0.487994	0.608215	-0.802338	0.422358	0.597722	NOG	2312	1250	E	asparagine synthetase	No
COG0369	3.38655	-0.603433	0.437777	-1.3784	0.16808	0.32522	NOG	2177	827	P	Component of the sulfite reductase complex that catalyzes the 6-electron reduction of sulfite to sulfide. This is one of several activities required for the biosynthesis of L- cysteine from sulfate. The flavoprotein component catalyzes the electron flow from NADPH - FAD - FMN to the hemoprotein component (By similarity)	No
COG0372	16.566	0.491768	0.227984	2.15703	0.0310031	0.105673	NOG	2922	1566	C	citrate synthase	No
COG0377	1.53887	0.118484	0.601637	0.196936	0.843878	0.906026	NOG	1478	1205	C	NDH-1 shuttles electrons from NADH, via FMN and iron- sulfur (Fe-S) centers, to quinones in the respiratory chain. The immediate electron acceptor for the enzyme in this species is believed to be ubiquinone. Couples the redox reaction to proton translocation (for every two electrons transferred, four hydrogen ions are translocated across the cytoplasmic membrane), and thus conserves the redox ene…	No
COG0378	2.88048	0.612873	0.470555	1.30245	0.192763	0.353399	NOG	1366	988	KO	Facilitates the functional incorporation of the urease nickel metallocenter. This process requires GTP hydrolysis, probably effectuated by UreG (By similarity)	No
COG0386	2.13736	-0.244194	0.638458	-0.382475	0.702109	0.816092	NOG	2084	1120	O	glutathione peroxidase	No
COG0387	4.57568	-0.915712	0.449103	-2.03898	0.041452	0.128608	NOG	980	484	P	Calcium Proton	No
COG0388	3.33448	-0.65737	0.54766	-1.20033	0.230013	0.40161	NOG	5870	1755	S	nitrilase cyanide hydratase and apolipoprotein n-acyltransferase	No
COG0389	1.67477	-0.0823544	0.696613	-0.118221	0.905892	0.949853	NOG	3639	1688	L	Poorly processive error-prone DNA polymerase involved in untargeted mutagenesis. Copies undamaged DNA at stalled replication forks which arise in vivo from mismatched or misaligned primer ends. These misaligned primers can be extended by polIV. Exhibits no 3-5 exonuclease (proofreading) activity. May be involved in translesional synthesis in conjunction with the beta clamp from polIII (By similar…	No
COG0398	1.64248	-1.26344	0.675443	-1.87053	0.0614101	0.167734	NOG	1756	955	S	Snare associated golgi protein	No
COG0403	1.81162	1.03426	0.631564	1.63762	0.101501	0.237098	NOG	1405	1316	E	The glycine cleavage system catalyzes the degradation of glycine. The P protein binds the alpha-amino group of glycine through its pyridoxal phosphate cofactor	No
COG0404	1.81993	-1.28473	0.754148	-1.70355	0.0884655	0.214086	NOG	2407	1354	E	The glycine cleavage system catalyzes the degradation of glycine (By similarity)	No
COG0406	3.69497	-0.151151	0.460196	-0.328449	0.742572	0.846057	NOG	5118	1590	G	Phosphoglycerate mutase	No
COG0408	1.35926	-1.52123	0.872801	-1.74293	0.0813456	0.204208	NOG	907	863	H	Key enzyme in heme biosynthesis. Catalyzes the oxidative decarboxylation of propionic acid side chains of rings A and B of coproporphyrinogen III (By similarity)	No
COG0412	2.02094	-0.922254	0.603613	-1.52789	0.12654	0.272808	NOG	2240	894	Q	dienelactone hydrolase	No
COG0417	1.30732	-0.801833	0.615604	-1.30252	0.19274	0.353399	NOG	1570	577	L	DNA polymerase	No
COG0419	2.09808	0.434777	0.714302	0.608674	0.542741	0.692739	NOG	1504	1179	L	Involved in DNA double-strand break repair (DSBR). The Rad50 Mre11 complex possesses single-strand endonuclease activity and ATP-dependent double-strand-specific 3'-5' exonuclease activity. Rad50 provides an ATP-dependent control of Mre11 by unwinding and or repositioning DNA ends into the Mre11 active site (By similarity)	No
COG0421	3.15544	0.91946	0.483915	1.90004	0.0574273	0.160944	NOG	1712	1137	E	Catalyzes the production of spermidine from putrescine and decarboxylated S-adenosylmethionine (dcSAM), which serves as an aminopropyl donor (By similarity)	No
COG0423	1.53682	0.607006	0.582499	1.04207	0.297378	0.473445	NOG	1122	955	J	Catalyzes the attachment of glycine to tRNA(Gly) (By similarity)	No
COG0428	1.66207	-1.63217	0.68293	-2.38996	0.0168504	0.0732608	NOG	2026	939	P	zinc transporter	No
COG0435	1.78637	-1.0925	0.663353	-1.64693	0.0995714	0.233945	NOG	896	612	O	glutathione Stransferase	No
COG0436	5.89017	0.192575	0.395566	0.486834	0.626376	0.754025	NOG	8308	1931	E	aminotransferase	No
COG0438	14.0937	0.353841	0.363626	0.973089	0.330509	0.508799	NOG	13206	1905	M	Glycosyl transferase (Group 1	No
COG0439	5.09051	-0.188194	0.453205	-0.415251	0.677958	0.795664	NOG	3031	1660	I	acetyl-CoA carboxylase biotin carboxylase	No
COG0440	1.3578	-0.0982737	0.771797	-0.127331	0.898678	0.946528	NOG	1686	1479	E	Acetolactate synthase small subunit	No
COG0441	4.14042	0.248067	0.413664	0.599683	0.548717	0.697598	NOG	2803	2016	J	threonine-tRNA ligase activity	No
COG0442	2.14711	-0.108559	0.504809	-0.215049	0.829729	0.899617	NOG	2423	2025	J	Catalyzes the attachment of proline to tRNA(Pro) in a two-step reaction proline is first activated by ATP to form Pro- AMP and then transferred to the acceptor end of tRNA(Pro). As ProRS can inadvertently accommodate and process non-cognate amino acids such as alanine and cysteine, to avoid such errors it has two additional distinct editing activities against alanine. One activity is designated a…	No
COG0449	10.6179	0.578278	0.38148	1.51588	0.12955	0.275493	NOG	2370	1905	M	Catalyzes the first step in hexosamine metabolism, converting fructose-6P into glucosamine-6P using glutamine as a nitrogen source (By similarity)	No
COG0452	1.60787	-0.0734418	0.58134	-0.126332	0.899469	0.946528	NOG	2574	1885	H	Phosphopantothenoylcysteine decarboxylase	No
COG0454	4.34287	0.23148	0.488651	0.473712	0.635705	0.761587	NOG	7962	1701	K	acetyltransferase	No
COG0457	3.80194	-0.4402	0.442288	-0.995279	0.319601	0.495791	NOG	10326	1650	S	repeat-containing protein	No
COG0458	6.07626	-0.602364	0.350648	-1.71786	0.0858218	0.210638	NOG	2454	1845	F	carbamoyl-phosphate synthetase ammonia chain	No
COG0459	20.6471	-0.122571	0.198923	-0.616173	0.53778	0.68923	NOG	5192	2002	O	Prevents misfolding and promotes the refolding and proper assembly of unfolded polypeptides generated under stress conditions (By similarity)	No
COG0460	1.26062	-0.628808	0.700181	-0.898065	0.369151	0.549412	NOG	2131	1706	E	homoserine dehydrogenase	No
COG0462	3.01329	-0.128659	0.485442	-0.265035	0.790983	0.874853	NOG	3053	2002	F	Phosphoribosyl pyrophosphate synthase	No
COG0463	2.78591	0.476112	0.538255	0.884547	0.376401	0.555421	NOG	12141	1932	M	Glycosyl transferase, family 2	No
COG0464	15.4863	-0.0954877	0.266448	-0.358372	0.720065	0.828999	NOG	5976	1198	O	Aaa atpase	No
COG0465	7.61304	-0.665749	0.368199	-1.80812	0.0705875	0.185676	NOG	4740	1895	O	Acts as a processive, ATP-dependent zinc metallopeptidase for both cytoplasmic and membrane proteins. Plays a role in the quality control of integral membrane proteins (By similarity)	No
COG0466	3.5098	-0.563173	0.446963	-1.26	0.20767	0.374487	NOG	2259	1532	O	ATP-dependent serine protease that mediates the selective degradation of mutant and abnormal proteins as well as certain short-lived regulatory proteins. Required for cellular homeostasis and for survival from DNA damage and developmental changes induced by stress. Degrades polypeptides processively to yield small peptide fragments that are 5 to 10 amino acids long. Binds to DNA in a double-stran…	No
COG0468	1.54061	0.248842	0.677999	0.367024	0.713601	0.825784	NOG	3023	1997	L	Can catalyze the hydrolysis of ATP in the presence of single-stranded DNA, the ATP-dependent uptake of single-stranded DNA by duplex DNA, and the ATP-dependent hybridization of homologous single-stranded DNAs. It interacts with LexA causing its activation and leading to its autocatalytic cleavage (By similarity)	No
COG0469	3.8149	-0.520253	0.479666	-1.08462	0.278091	0.451665	NOG	2871	1873	G	Pyruvate kinase	No
COG0470	1.94998	-0.421771	0.621866	-0.678235	0.497623	0.663863	NOG	3201	1760	L	DNA polymerase III subunit delta'	No
COG0471	2.00294	-0.5614	0.593608	-0.945743	0.34428	0.522028	NOG	3088	1310	P	Transporter	No
COG0473	6.03938	0.0665037	0.439538	0.151304	0.879736	0.932937	NOG	3232	1698	E	3-isopropylmalate dehydrogenase activity	No
COG0479	2.95965	-0.0376706	0.49225	-0.0765274	0.939	0.966147	NOG	2041	1525	C	succinate dehydrogenase	No
COG0480	28.1684	0.133264	0.19927	0.668762	0.503647	0.668263	NOG	4645	2024	J	Catalyzes the GTP-dependent ribosomal translocation step during translation elongation. During this step, the ribosome changes from the pre-translocational (PRE) to the post- translocational (POST) state as the newly formed A-site-bound peptidyl-tRNA and P-site-bound deacylated tRNA move to the P and E sites, respectively. Catalyzes the coordinated movement of the two tRNA molecules, the mRNA and…	No
COG0481	2.30074	0.500085	0.584301	0.855869	0.39207	0.564767	NOG	1994	1883	M	Required for accurate and efficient protein synthesis under certain stress conditions. May act as a fidelity factor of the translation reaction, by catalyzing a one-codon backward translocation of tRNAs on improperly translocated ribosomes. Back- translocation proceeds from a post-translocation (POST) complex to a pre-translocation (PRE) complex, thus giving elongation factor G a second chance to…	No
COG0488	43.7002	-0.0693568	0.261066	-0.265668	0.790495	0.874853	NOG	7328	1812	S	(ABC) transporter	No
COG0489	1.84541	-0.506183	0.584274	-0.866344	0.386302	0.561134	NOG	4121	1895	D	ATP-binding protein	No
COG0491	2.89569	-0.266913	0.494471	-0.539796	0.589338	0.723224	NOG	7522	1842	S	Beta-lactamase domain protein	No
COG0492	2.44196	0.514934	0.581493	0.885538	0.375867	0.555421	NOG	4039	1890	O	thioredoxin reductase	No
COG0493	4.99797	-0.05137	0.410343	-0.125188	0.900375	0.946528	NOG	3249	1556	E	metal cluster binding	No
COG0494	2.53781	0.485914	0.50955	0.953614	0.340279	0.518562	NOG	10044	1869	L	Nudix hydrolase	No
COG0495	2.54756	-0.382697	0.574419	-0.666232	0.505263	0.669625	NOG	2401	2016	J	Leucyl-trna synthetase	No
COG0498	1.73726	0.271647	0.690291	0.393526	0.693931	0.80932	NOG	2342	1760	E	threonine synthase	No
COG0499	10.5233	0.416342	0.300282	1.3865	0.165593	0.321533	NOG	1516	1207	H	May play a key role in the regulation of the intracellular concentration of adenosylhomocysteine (By similarity)	No
COG0500	3.67265	-0.0400935	0.511811	-0.0783366	0.93756	0.966147	NOG	11350	1891	Q	Methyltransferase	No
COG0501	2.67811	0.165285	0.531014	0.311262	0.755601	0.852076	NOG	3453	1561	O	Protease HtpX homolog	No
COG0502	1.56417	-0.834999	0.643494	-1.2976	0.194424	0.355368	NOG	1631	1327	H	Catalyzes the conversion of dethiobiotin (DTB) to biotin by the insertion of a sulfur atom into dethiobiotin via a radical- based mechanism (By similarity)	No
COG0503	1.15797	-1.1099	0.684727	-1.62094	0.105031	0.24219	NOG	2997	1762	F	Catalyzes a salvage reaction resulting in the formation of AMP, that is energically less costly than de novo synthesis (By similarity)	No
COG0505	5.27757	-0.275824	0.433137	-0.636804	0.524253	0.679171	NOG	2114	1821	F	carbamoyl-phosphate synthetase glutamine chain	No
COG0506	1.99183	0.454122	0.687737	0.660313	0.509053	0.670778	NOG	1357	1115	E	Proline dehydrogenase	No
COG0507	3.38319	-0.00896307	0.644015	-0.0139175	0.988896	0.992951	NOG	4352	1520	L	exodeoxyribonuclease v alpha	No
COG0508	8.09972	0.0309488	0.31959	0.0968392	0.922854	0.959324	NOG	4534	1519	C	Dehydrogenase	No
COG0509	0.906624	-0.942938	0.748016	-1.26059	0.207458	0.374487	NOG	1808	1446	E	The glycine cleavage system catalyzes the degradation of glycine. The H protein shuttles the methylamine group of glycine from the P protein to the T protein (By similarity)	No
COG0511	2.04072	-0.828092	0.580753	-1.42589	0.153899	0.308676	NOG	2521	1694	I	Acetyl-CoA carboxylase, biotin carboxyl carrier protein	No
COG0512	1.56842	-0.242549	0.704905	-0.344088	0.73078	0.838146	NOG	2260	1587	E	anthranilate synthase	No
COG0513	34.9805	0.39784	0.219153	1.81535	0.0694704	0.183937	NOG	9254	1815	L	purine NTP-dependent helicase activity	No
COG0514	2.02792	0.07039	0.604698	0.116405	0.907331	0.95032	NOG	3359	1432	L	atp-dependent dna helicase	No
COG0516	2.89747	0.144296	0.508899	0.283546	0.776758	0.866246	NOG	2757	1864	F	Catalyzes the conversion of inosine 5'-phosphate (IMP) to xanthosine 5'-phosphate (XMP), the first committed and rate- limiting step in the de novo synthesis of guanine nucleotides, and therefore plays an important role in the regulation of cell growth (By similarity)	No
COG0517	6.63233	-0.131223	0.358357	-0.36618	0.714231	0.825784	NOG	7785	1919	S	Catalyzes the conversion of inosine 5'-phosphate (IMP) to xanthosine 5'-phosphate (XMP), the first committed and rate- limiting step in the de novo synthesis of guanine nucleotides, and therefore plays an important role in the regulation of cell growth (By similarity)	No
COG0518	2.46442	-0.324409	0.491766	-0.659681	0.509459	0.670778	NOG	3209	1933	F	Catalyzes the synthesis of GMP from XMP (By similarity)	No
COG0519	2.1621	-0.402072	0.540011	-0.744562	0.456537	0.627025	NOG	2050	1932	F	Catalyzes the synthesis of GMP from XMP (By similarity)	No
COG0520	1.6269	-1.65954	0.68326	-2.42886	0.0151464	0.0696851	NOG	3792	1755	E	cysteine desulfurase	No
COG0524	2.75604	-0.649566	0.529073	-1.22774	0.219543	0.387806	NOG	6665	1747	G	pfkb domain protein	No
COG0525	4.00983	1.12558	0.433142	2.59864	0.00935933	0.0526735	NOG	2320	2016	J	amino acids such as threonine, to avoid such errors, it has a posttransfer editing activity that hydrolyzes mischarged Thr-tRNA(Val) in a tRNA-dependent manner (By similarity)	No
COG0527	1.96979	0.310117	0.62591	0.495466	0.620271	0.75132	NOG	2906	1804	E	Aspartokinase	No
COG0529	1.24969	-0.0503309	0.734836	-0.0684926	0.945394	0.971075	NOG	1238	951	P	Catalyzes the synthesis of activated sulfate (By similarity)	No
COG0532	4.82422	0.053962	0.522506	0.103275	0.917744	0.957302	NOG	2484	2014	J	One of the essential components for the initiation of protein synthesis. Protects formylmethionyl-tRNA from spontaneous hydrolysis and promotes its binding to the 30S ribosomal subunits. Also involved in the hydrolysis of GTP during the formation of the 70S ribosomal complex (By similarity)	No
COG0534	2.47941	-0.778123	0.568922	-1.36771	0.171401	0.328678	NOG	8204	1682	V	Mate efflux family protein	No
COG0537	1.22925	-0.274773	0.650385	-0.422478	0.672676	0.79254	NOG	3665	1997	FG	histidine triad (hIT) protein	No
COG0538	3.98809	-0.11836	0.458276	-0.258273	0.796196	0.877411	NOG	1387	1133	C	isocitrate dehydrogenase (NADp)	No
COG0539	3.29726	-0.127374	0.550752	-0.231273	0.817103	0.891573	NOG	2337	1850	J	thus facilitating recognition of the initiation point. It is needed to translate mRNA with a short Shine-Dalgarno (SD) purine-rich sequence (By similarity)	No
COG0540	1.99547	-0.335877	0.573795	-0.585361	0.558305	0.70443	NOG	1989	1857	F	aspartate transcarbamylase	No
COG0541	1.07164	0.0404238	0.724951	0.0557607	0.955532	0.977341	NOG	2167	2002	U	Involved in targeting and insertion of nascent membrane proteins into the cytoplasmic membrane. Binds to the hydrophobic signal sequence of the ribosome-nascent chain (RNC) as it emerges from the ribosomes. The SRP-RNC complex is then targeted to the cytoplasmic membrane where it interacts with the SRP receptor FtsY	No
COG0542	8.38101	0.293528	0.326407	0.89927	0.368509	0.549133	NOG	5314	1862	O	ATP-dependent CLP protease ATP-binding subunit	No
COG0543	3.66907	-1.0322	0.54553	-1.8921	0.0584775	0.162596	NOG	3506	1422	C	cytochrome-b5 reductase activity, acting on NAD(P)H	No
COG0545	3.75233	-0.628821	0.502813	-1.25061	0.211078	0.377817	NOG	4083	1121	O	Peptidyl-prolyl cis-trans isomerase	No
COG0548	2.28677	-0.103213	0.572181	-0.180385	0.85685	0.916415	NOG	2076	1558	E	nag kinase	No
COG0552	1.69949	-0.301053	0.616244	-0.488529	0.625175	0.754025	NOG	2092	2000	U	Involved in targeting and insertion of nascent membrane proteins into the cytoplasmic membrane. Acts as a receptor for the complex formed by the signal recognition particle (SRP) and the ribosome-nascent chain (RNC)	No
COG0553	9.03455	-0.693812	0.369641	-1.87699	0.0605195	0.166428	NOG	6954	1422	L	helicase	No
COG0557	3.4183	-1.02293	0.467945	-2.186	0.0288158	0.102486	NOG	2623	1717	K	3'-5' exoribonuclease that releases 5'-nucleoside monophosphates and is involved in maturation of structured RNAs (By similarity)	No
COG0558	0.808066	-0.195174	0.833549	-0.234148	0.81487	0.891454	NOG	3139	1849	I	cdp-diacylglycerol-glycerol-3-phosphate 3-phosphatidyltransferase	No
COG0560	1.52911	0.844319	0.684814	1.23292	0.217607	0.386474	NOG	2380	1378	E	phosphoserine phosphatase activity	No
COG0561	2.63201	-0.539595	0.568291	-0.949505	0.342364	0.520428	NOG	5195	1599	S	,hydrolase	No
COG0563	2.82577	-0.117738	0.571462	-0.20603	0.836767	0.904816	NOG	3963	1956	F	Catalyzes the reversible transfer of the terminal phosphate group between ATP and AMP. Plays an important role in cellular energy homeostasis and in adenine nucleotide metabolism (By similarity)	No
COG0564	2.36475	-0.116821	0.708637	-0.164853	0.86906	0.924044	NOG	5986	1913	J	pseudouridine synthase activity	No
COG0566	1.68077	-0.263411	0.631408	-0.417181	0.676546	0.79555	NOG	4593	1877	J	Methyltransferase	No
COG0567	7.81992	-0.0920005	0.316642	-0.290551	0.771395	0.865049	NOG	1518	1167	C	2-oxoglutarate dehydrogenase, E1	No
COG0568	3.71952	1.43721	0.634273	2.26592	0.0234561	0.0906395	NOG	3881	1700	K	Sigma factors are initiation factors that promote the attachment of RNA polymerase to specific initiation sites and are then released (By similarity)	No
COG0571	1.33587	-0.0237787	0.665777	-0.0357158	0.971509	0.983763	NOG	2503	1854	K	Digests double-stranded RNA. Involved in the processing of primary rRNA transcript to yield the immediate precursors to the large and small rRNAs (23S and 16S). Also processes some mRNAs, and tRNAs when they are encoded in the rRNA operon (By similarity)	No
COG0574	1.63329	0.956608	0.840386	1.1383	0.254997	0.425442	NOG	2394	1502	G	phosphotransferase activity, paired acceptors	No
COG0575	1.78784	0.656054	0.632264	1.03763	0.299444	0.473631	NOG	2237	1995	I	phosphatidate Cytidylyltransferase	No
COG0578	2.45897	-0.961913	0.664437	-1.44771	0.147698	0.300866	NOG	1657	1178	C	glycerol-3-phosphate dehydrogenase	No
COG0582	3.67114	1.23436	0.649738	1.89979	0.0574611	0.160944	NOG	6882	1552	L	Integrase	No
COG0583	1.79911	1.3721	0.69255	1.98123	0.0475656	0.140377	NOG	7202	1403	K	Transcriptional regulator	No
COG0584	1.02185	-1.18576	0.731959	-1.61998	0.105237	0.24219	NOG	3727	1542	C	glycerophosphoryl diester phosphodiesterase	No
COG0587	4.26686	1.24953	0.59229	2.10966	0.034888	0.114713	NOG	2340	1668	L	DNA polymerase III (alpha subunit)	No
COG0591	2.64869	0.46941	0.823917	0.569729	0.568861	0.707423	NOG	3583	1369	E	symporter	No
COG0598	2.42019	0.183412	0.643309	0.285107	0.775562	0.865953	NOG	2545	1474	P	magnesium and cobalt transport protein CorA	No
COG0604	7.85443	-1.00378	0.501586	-2.00121	0.04537	0.135121	NOG	7763	1343	C	alcohol dehydrogenase	No
COG0605	6.29686	-0.432084	0.372921	-1.15865	0.246599	0.416672	NOG	2306	1578	P	Destroys radicals which are normally produced within the cells and which are toxic to biological systems (By similarity)	No
COG0612	7.76778	-0.755358	0.352367	-2.14367	0.0320593	0.108455	NOG	4497	1599	O	peptidase'	No
COG0615	1.38195	-1.50505	0.711421	-2.11555	0.0343831	0.113982	NOG	1103	634	IM	cytidylyltransferase	No
COG0620	8.71744	-0.0945537	0.351226	-0.26921	0.787768	0.87296	NOG	1778	1154	E	Catalyzes the transfer of a methyl group from 5- methyltetrahydrofolate to homocysteine resulting in methionine formation (By similarity)	No
COG0621	2.99878	0.0823121	0.732237	0.112412	0.910497	0.952205	NOG	3828	1748	J	Catalyzes the methylthiolation of N6- (dimethylallyl)adenosine (i(6)A), leading to the formation of 2- methylthio-N6-(dimethylallyl)adenosine (ms(2)i(6)A) at position 37 in tRNAs that read codons beginning with uridine (By similarity)	No
COG0624	5.78938	-0.117855	0.463194	-0.25444	0.799156	0.879208	NOG	6728	1806	E	succinyl-diaminopimelate desuccinylase activity	No
COG0626	3.96025	-0.224655	0.457768	-0.490762	0.623595	0.753044	NOG	3500	1477	E	cystathionine	No
COG0628	3.07631	1.16717	0.533348	2.18839	0.0286414	0.102231	NOG	4224	1676	S	Membrane	No
COG0636	10.9578	0.10427	0.334856	0.311387	0.755507	0.852076	NOG	2640	1535	C	F(1)F(0) ATP synthase produces ATP from ADP in the presence of a proton or sodium gradient. F-type ATPases consist of two structural domains, F(1) containing the extramembraneous catalytic core and F(0) containing the membrane proton channel, linked together by a central stalk and a peripheral stalk. During catalysis, ATP synthesis in the catalytic domain of F(1) is coupled via a rotary mechanism…	No
COG0637	2.31599	0.295847	0.677677	0.436561	0.66243	0.784286	NOG	4044	1559	S	HAD-superfamily hydrolase subfamily IA variant 3	No
COG0638	8.21334	-0.767125	0.377744	-2.03081	0.0422745	0.13049	NOG	2303	464	O	The proteasome is a multicatalytic proteinase complex which is characterized by its ability to cleave peptides with Arg, Phe, Tyr, Leu, and Glu adjacent to the leaving group at neutral or slightly basic pH. The proteasome has an ATP-dependent proteolytic activity (By similarity)	No
COG0639	10.761	0.271685	0.273943	0.991759	0.321315	0.497812	NOG	5463	1448	T	serine threonine-protein phosphatase	No
COG0642	9.85434	-0.287212	0.37328	-0.769428	0.441639	0.612825	NOG	12227	1815	T	Histidine kinase	No
COG0643	2.19415	0.887605	0.657161	1.35067	0.176803	0.335842	NOG	1687	867	T	CheA signal transduction histidine kinase	No
COG0644	2.19683	0.769934	0.521885	1.47529	0.140133	0.290345	NOG	2334	1203	C	geranylgeranyl reductase	No
COG0646	2.11592	1.09832	0.657849	1.66956	0.0950063	0.226642	NOG	1591	1244	E	homocysteine S-methyltransferase activity	No
COG0647	1.66312	-1.02037	0.632448	-1.61336	0.106666	0.242766	NOG	2172	1093	G	Hydrolase	No
COG0649	3.58029	0.33715	0.478642	0.704387	0.481192	0.647655	NOG	1476	1205	C	NDH-1 shuttles electrons from NADH, via FMN and iron- sulfur (Fe-S) centers, to quinones in the respiratory chain. The immediate electron acceptor for the enzyme in this species is believed to be ubiquinone. Couples the redox reaction to proton translocation (for every two electrons transferred, four hydrogen ions are translocated across the cytoplasmic membrane), and thus conserves the redox ene…	No
COG0652	23.0423	0.039487	0.251404	0.157066	0.875193	0.929748	NOG	6393	1762	O	peptidyl-prolyl cis-trans isomerase activity	No
COG0653	2.81857	0.477298	0.613424	0.778088	0.436517	0.607386	NOG	2159	1715	U	Part of the Sec protein translocase complex. Interacts with the SecYEG preprotein conducting channel. Has a central role in coupling the hydrolysis of ATP to the transfer of proteins into and across the cell membrane, serving	No
COG0654	5.64304	-0.172519	0.37278	-0.462791	0.643514	0.76866	NOG	6569	1125	CH	oxidoreductase activity, acting on paired donors, with incorporation or reduction of molecular oxygen, NAD(P)H as one donor, and incorporation of one atom of oxygen	No
COG0656	3.90939	-0.705396	0.461722	-1.52775	0.126574	0.272808	NOG	4667	1249	S	reductase	No
COG0657	3.8297	-0.591084	0.49394	-1.19667	0.231435	0.401844	NOG	5968	1318	I	alpha beta hydrolase fold-3 domain protein	No
COG0659	2.80633	-0.89386	0.534192	-1.67329	0.0942699	0.225874	NOG	3903	1299	P	sulfate transporter	No
COG0661	2.90539	0.133975	0.490842	0.27295	0.784892	0.871302	NOG	3145	1334	S	Required, probably indirectly, for the hydroxylation of 2-octaprenylphenol to 2-octaprenyl-6-hydroxy-phenol, the fourth step in ubiquinone biosynthesis (By similarity)	No
COG0663	1.15933	-0.598573	0.818667	-0.731156	0.464684	0.631308	NOG	1673	1201	S	Transferase	No
COG0664	2.62704	-1.42663	0.658957	-2.16498	0.0303896	0.104874	NOG	6311	1643	T	transcriptional regulator, crp fnr family	No
COG0665	2.57592	-0.509636	0.575052	-0.886244	0.375486	0.555421	NOG	4528	1400	E	Catalyzes the last two steps in the biosynthesis of 5- methylaminomethyl-2-thiouridine (mnm(5)s(2)U) at the wobble position (U34) in tRNA. Catalyzes the FAD-dependent demodification of cmnm(5)s(2)U34 to nm(5)s(2)U34, followed by the transfer of a methyl group from S-adenosyl-L-methionine to nm(5)s(2)U34, to form mnm(5)s(2)U34 (By similarity)	No
COG0668	1.85248	0.327372	0.588853	0.555949	0.578246	0.714626	NOG	4148	1687	M	Mechanosensitive ion channel	No
COG0671	2.12765	-1.55036	0.597207	-2.59602	0.00943102	0.0528312	NOG	3745	1424	I	PHOsphatase	No
COG0673	3.46213	-0.3957	0.491356	-0.805322	0.420634	0.596613	NOG	7318	1612	S	oxidoreductase	No
COG0674	2.2064	-0.590131	0.568134	-1.03872	0.298936	0.473445	NOG	2219	1025	C	Oxidoreductase required for the transfer of electrons from pyruvate to flavodoxin (By similarity)	No
COG0675	4.69261	0.646664	0.536973	1.20428	0.228482	0.399514	NOG	2897	418	L	Transposase	No
COG0688	1.19451	0.266997	0.642253	0.415719	0.677616	0.795664	NOG	1768	1368	I	Phosphatidylserine decarboxylase	No
COG0693	4.478	-0.0392723	0.455288	-0.0862581	0.931261	0.964199	NOG	3633	1611	S	PfpI family	No
COG0694	1.63396	-0.25542	0.687376	-0.371588	0.7102	0.823808	NOG	1504	1144	O	metallo-sulfur cluster assembly	No
COG0695	1.92833	-1.04473	0.658388	-1.5868	0.112558	0.250428	NOG	3049	1393	O	Glutaredoxin	No
COG0699	3.15674	-0.995073	0.524649	-1.89665	0.0578747	0.161356	NOG	2524	576	S	Dynamin family	No
COG0702	2.13871	-0.196489	0.715641	-0.274564	0.783651	0.871302	NOG	4700	1340	GM	epimerase dehydratase	No
COG0705	2.29475	-0.396937	0.688362	-0.576639	0.564183	0.706235	NOG	3087	1544	S	rhomboid family	No
COG0706	3.19919	0.207884	0.681839	0.304887	0.760453	0.855951	NOG	2469	1864	U	Required for the insertion and or proper folding and or complex formation of integral membrane proteins into the membrane. Involved in integration of membrane proteins that insert both dependently and independently of the Sec translocase complex, as well as at least some lipoproteins	No
COG0708	1.13593	0.485282	0.747797	0.648949	0.516371	0.675271	NOG	2524	1714	L	Exodeoxyribonuclease III	No
COG0710	0.886764	-1.11213	0.736188	-1.51066	0.130875	0.277104	NOG	693	568	E	Type I DHQase	No
COG0712	2.20914	-1.043	0.599558	-1.73961	0.0819281	0.20482	NOG	1804	1688	C	F(1)F(0) ATP synthase produces ATP from ADP in the presence of a proton or sodium gradient. F-type ATPases consist of two structural domains, F(1) containing the extramembraneous catalytic core and F(0) containing the membrane proton channel, linked together by a central stalk and a peripheral stalk. During catalysis, ATP synthesis in the catalytic domain of F(1) is coupled via a rotary mechanism…	No
COG0715	1.38865	-0.178339	0.707499	-0.25207	0.800987	0.879487	NOG	3427	1224	P	(ABC) transporter	No
COG0716	1.36714	-0.716913	0.709106	-1.01101	0.312012	0.487771	NOG	2248	1005	C	Low-potential electron donor to a number of redox enzymes (By similarity)	No
COG0722	3.06227	0.319031	0.462934	0.689149	0.490729	0.656179	NOG	1391	810	E	Stereospecific condensation of phosphoenolpyruvate (PEP) and D-erythrose-4-phosphate (E4P) giving rise to 3-deoxy-D- arabino-heptulosonate-7-phosphate (DAHP) (By similarity)	No
COG0723	3.67301	-0.5914	0.426765	-1.38578	0.165815	0.321533	NOG	1660	1159	C	Component of the ubiquinol-cytochrome c reductase complex (complex III or cytochrome b-c1 complex), which is a respiratory chain that generates an electrochemical potential coupled to ATP synthesis (By similarity)	No
COG0724	6.25034	-0.661658	0.374823	-1.76525	0.0775214	0.197892	NOG	6097	616	S	Rna-binding protein	No
COG0726	3.04359	-0.38983	0.580152	-0.671945	0.501619	0.667703	NOG	4615	1494	G	4-amino-4-deoxy-alpha-L-arabinopyranosyl undecaprenyl phosphate biosynthetic process	No
COG0733	1.6768	-0.764339	0.733711	-1.04174	0.29753	0.473445	NOG	3518	889	P	Transporter	No
COG0736	2.36989	-0.526985	0.547183	-0.963086	0.335504	0.514525	NOG	1319	1244	I	Transfers the 4'-phosphopantetheine moiety from coenzyme A to a Ser of acyl-carrier-protein (By similarity)	No
COG0737	1.82316	-0.255192	0.558236	-0.45714	0.647571	0.772694	NOG	2756	1239	F	5-Nucleotidase	No
COG0738	3.47429	-0.0288721	0.485603	-0.0594562	0.952589	0.975592	NOG	1123	457	G	Transporter	No
COG0740	1.93472	-0.666051	0.681484	-0.977354	0.328394	0.506832	NOG	3365	1816	O	Cleaves peptides in various proteins in a process that requires ATP hydrolysis. Has a chymotrypsin-like activity. Plays a major role in the degradation of misfolded proteins (By similarity)	No
COG0741	2.85772	0.914975	0.670833	1.36394	0.172587	0.329612	NOG	3913	1329	M	transglycosylase	No
COG0744	3.01373	1.38149	0.679151	2.03415	0.0419366	0.129778	NOG	3003	1404	M	penicillin-binding protein	No
COG0745	5.91211	1.45938	0.613603	2.37838	0.0173891	0.0738742	NOG	14761	1664	T	regulatoR	No
COG0747	3.55402	1.02169	0.670028	1.52485	0.127297	0.272808	NOG	4843	1298	E	Extracellular solute-binding protein, family 5	No
COG0749	2.61291	1.31551	0.567322	2.3188	0.0204059	0.083135	NOG	2180	1836	L	DNA polymerase	No
COG0753	4.59103	0.6103	0.435355	1.40184	0.160962	0.315662	NOG	1758	934	P	Catalase	No
COG0760	3.63412	-0.639573	0.452068	-1.41477	0.157136	0.310831	NOG	3781	1553	O	peptidyl-prolyl cis-trans isomerase	No
COG0768	4.07014	0.57375	0.722941	0.793634	0.427409	0.600656	NOG	4238	1626	M	penicillin-binding protein	No
COG0778	2.27642	0.969297	0.647849	1.49618	0.134608	0.281304	NOG	5352	1734	C	nitroreductase	No
COG0784	3.62549	0.0563967	0.557294	0.101198	0.919394	0.958197	NOG	6835	1342	T	response regulator	No
COG0790	2.47193	-0.7055	0.606056	-1.16408	0.24439	0.41451	NOG	3070	926	S	Sel1 domain protein repeat-containing protein	No
COG0804	2.80071	0.00934209	0.678158	0.0137757	0.989009	0.992951	NOG	710	613	E	Urea amidohydrolase subunit alpha	No
COG0807	2.97736	0.304669	0.528338	0.576656	0.564172	0.706235	NOG	2207	1518	H	Catalyzes the conversion of D-ribulose 5-phosphate to formate and 3,4-dihydroxy-2-butanone 4-phosphate (By similarity)	No
COG0814	3.31438	-0.654648	0.522832	-1.25212	0.210527	0.377817	NOG	4722	536	E	amino acid transport	No
COG0831	1.512	-0.79962	0.771774	-1.03608	0.300164	0.473638	NOG	691	607	E	Urea amidohydrolase subunit gamma	No
COG0832	1.67146	-0.985802	0.749809	-1.31474	0.188598	0.350005	NOG	692	606	E	Urea amidohydrolase subunit beta	No
COG0833	10.4927	-0.982695	0.434444	-2.26196	0.0236999	0.0907498	NOG	1094	423	E	permease	No
COG0834	2.80603	1.30476	0.682653	1.91131	0.055965	0.158589	NOG	6143	1420	E	(ABC) transporter	No
COG0837	1.07588	-1.33647	0.781221	-1.71074	0.0871292	0.212641	NOG	569	502	G	glucokinase (EC 2.7.1.2)	No
COG0840	3.91216	0.851937	0.640861	1.32936	0.183728	0.344668	NOG	9631	906	S	Methyl-accepting chemotaxis	No
COG0843	3.24841	0.5395	0.541861	0.995642	0.319424	0.495791	NOG	1882	1040	C	Cytochrome C oxidase subunit I	No
COG0845	2.14212	0.855332	0.609704	1.40287	0.160657	0.315662	NOG	4573	1295	M	Efflux transporter rnd family, mfp subunit	No
COG0846	0.852668	-1.08414	0.750836	-1.44391	0.148765	0.302531	NOG	2898	1471	K	NAD-dependent protein deacetylase which modulates the activities of several enzymes which are inactive in their acetylated form	No
COG0847	1.72317	0.19762	0.734286	0.269132	0.787828	0.87296	NOG	4114	1570	L	DNA polymerase iii	No
COG0852	1.55407	0.647439	0.620041	1.04419	0.296399	0.473143	NOG	1420	1199	C	NDH-1 shuttles electrons from NADH, via FMN and iron- sulfur (Fe-S) centers, to quinones in the respiratory chain. The immediate electron acceptor for the enzyme in this species is believed to be ubiquinone. Couples the redox reaction to proton translocation (for every two electrons transferred, four hydrogen ions are translocated across the cytoplasmic membrane), and thus conserves the redox ene…	No
COG0857	2.24728	-0.524993	0.62395	-0.841403	0.400122	0.572956	NOG	605	538	C	Involved in acetate metabolism (By similarity)	No
COG0861	2.38334	0.514708	0.700177	0.735111	0.462272	0.630607	NOG	2081	1103	P	membrane protein terC	No
COG1003	1.931	1.03345	0.601102	1.71927	0.085566	0.210437	NOG	1425	1315	E	The glycine cleavage system catalyzes the degradation of glycine. The P protein binds the alpha-amino group of glycine through its pyridoxal phosphate cofactor	No
COG1004	2.32877	-0.160359	0.500853	-0.320172	0.748838	0.849197	NOG	1936	1368	M	UDP-glucose 6-dehydrogenase	No
COG1009	4.028	1.37565	0.602627	2.28276	0.0224446	0.0890425	NOG	2262	1279	C	subunit l	No
COG1011	1.51397	0.3944	0.589796	0.668706	0.503683	0.668263	NOG	4696	1628	S	Hydrolase	No
COG1012	22.3396	-0.0859474	0.259774	-0.330855	0.740754	0.845578	NOG	14029	1807	C	Dehydrogenase	No
COG1013	1.77166	-0.0268649	0.660513	-0.0406728	0.967557	0.983562	NOG	2188	1034	C	Oxidoreductase required for the transfer of electrons from pyruvate to flavodoxin (By similarity)	No
COG1017	2.6013	-1.53309	0.878537	-1.74505	0.0809763	0.203703	NOG	626	530	C	Is involved in NO detoxification in an aerobic process, termed nitric oxide dioxygenase (NOD) reaction that utilizes O(2) and NAD(P)H to convert NO to nitrate, which protects the bacterium from various noxious nitrogen compounds. Therefore, plays a central role in the inducible response to nitrosative stress (By similarity)	No
COG1018	5.38843	-0.00780699	0.654948	-0.01192	0.990489	0.992951	NOG	3812	1041	C	Is involved in NO detoxification in an aerobic process, termed nitric oxide dioxygenase (NOD) reaction that utilizes O(2) and NAD(P)H to convert NO to nitrate, which protects the bacterium from various noxious nitrogen compounds. Therefore, plays a central role in the inducible response to nitrosative stress (By similarity)	No
COG1020	3.22415	-0.23293	0.510468	-0.456308	0.648169	0.772694	NOG	3921	876	Q	non-ribosomal peptide synthetase	No
COG1024	8.56472	-0.671229	0.373601	-1.79665	0.0723919	0.188693	NOG	9378	1341	I	Enoyl-CoA hydratase	No
COG1025	0.915858	-0.882729	0.757126	-1.16589	0.243657	0.414081	NOG	875	429	O	metalloendopeptidase activity	No
COG1026	0.843753	-1.1593	0.745828	-1.55438	0.120093	0.263248	NOG	708	507	O	peptidase	No
COG1034	3.20447	-0.0648009	0.515687	-0.125659	0.900002	0.946528	NOG	1368	1134	C	subunit g	No
COG1038	5.34845	0.580028	0.414145	1.40054	0.161351	0.315913	NOG	717	630	C	Catalyzes a 2-step reaction, involving the ATP-dependent carboxylation of the covalently attached biotin in the first step and the transfer of the carboxyl group to pyruvate in the second (By similarity)	No
COG1048	14.4677	-0.125442	0.247224	-0.507403	0.611872	0.743256	NOG	2279	1431	C	aconitate hydratase	No
COG1049	2.63771	-0.334995	0.852276	-0.393059	0.694276	0.80932	NOG	523	504	C	Aconitate hydratase 2	No
COG1053	12.5338	-0.595401	0.420316	-1.41656	0.156613	0.310831	NOG	4026	1731	C	Succinate DeHydrogenase	No
COG1061	1.69406	0.159349	0.603555	0.264018	0.791766	0.87492	NOG	1952	1139	L	type iii restriction protein res subunit	No
COG1071	3.90228	-0.51937	0.433682	-1.19758	0.231079	0.401844	NOG	2536	1241	C	Dehydrogenase	No
COG1073	1.62348	-0.527692	0.604761	-0.872564	0.382901	0.558054	NOG	4651	1475	S	Hydrolase	No
COG1075	2.40561	-0.0544452	0.613171	-0.0887929	0.929247	0.964199	NOG	1260	633	S	Triacylglycerol Lipase	No
COG1080	2.3757	1.77028	0.779046	2.27236	0.0230646	0.0900265	NOG	1421	1086	G	General (non sugar-specific) component of the phosphoenolpyruvate-dependent sugar phosphotransferase system (sugar PTS). This major carbohydrate active-transport system catalyzes the phosphorylation of incoming sugar substrates concomitantly with their translocation across the cell membrane. Enzyme I transfers the phosphoryl group from phosphoenolpyruvate (PEP) to the phosphoryl carrier protein (…	No
COG1084	1.67223	-0.541991	0.617767	-0.877338	0.380303	0.557103	NOG	448	349	S	Involved in the biogenesis of the 60S ribosomal subunit (By similarity)	No
COG1087	1.92066	1.21215	0.643271	1.88435	0.0595178	0.164421	NOG	2352	1602	M	udp-glucose 4-epimerase	No
COG1088	1.46637	1.23174	0.766491	1.60699	0.108057	0.244342	NOG	1942	1433	M	dTDP-glucose 4-6-dehydratase	No
COG1093	1.04572	0.0575055	0.671556	0.0856301	0.93176	0.964199	NOG	389	349	J	translation initiation factor	No
COG1100	28.4394	0.393557	0.201197	1.95608	0.0504557	0.14536	NOG	10529	520	S	GTP-binding Protein	No
COG1104	3.29296	0.403844	0.453478	0.890548	0.373172	0.554034	NOG	3018	1763	E	cysteine desulfurase	No
COG1109	7.89115	0.8398	0.409423	2.05118	0.0402494	0.125844	NOG	4829	1997	G	Catalyzes the conversion of glucosamine-6-phosphate to glucosamine-1-phosphate (By similarity)	No
COG1112	3.08206	-0.73077	0.514106	-1.42144	0.15519	0.308848	NOG	3508	974	L	Helicase	No
COG1113	2.95591	1.14971	0.683317	1.68254	0.0924647	0.221989	NOG	1819	534	E	amino acid	No
COG1126	2.31528	0.821818	0.725499	1.13276	0.257314	0.425442	NOG	4366	1312	E	ABC transporter, (ATP-binding protein)	No
COG1132	15.9169	-0.429231	0.24247	-1.77025	0.0766863	0.196752	NOG	17101	1938	V	(ABC) transporter	No
COG1136	3.14751	0.823306	0.724155	1.13692	0.255572	0.425442	NOG	8240	1774	V	(ABC) transporter	No
COG1143	1.77703	0.296158	0.584572	0.506624	0.612418	0.743256	NOG	1648	1286	C	NDH-1 shuttles electrons from NADH, via FMN and iron- sulfur (Fe-S) centers, to quinones in the respiratory chain. The immediate electron acceptor for the enzyme in this species is believed to be ubiquinone. Couples the redox reaction to proton translocation (for every two electrons transferred, four hydrogen ions are translocated across the cytoplasmic membrane), and thus conserves the redox ene…	No
COG1155	4.18303	-0.148441	0.372461	-0.398542	0.690231	0.806936	NOG	811	636	C	Produces ATP from ADP in the presence of a proton gradient across the membrane. The V-type alpha chain is a catalytic subunit (By similarity)	No
COG1156	5.34363	0.060595	0.405765	0.149335	0.881289	0.933508	NOG	832	639	C	Produces ATP from ADP in the presence of a proton gradient across the membrane. The V-type beta chain is a regulatory subunit (By similarity)	No
COG1161	1.52937	-1.03858	0.627789	-1.65435	0.0980564	0.231174	NOG	2507	1015	S	Required for a late step of 50S ribosomal subunit assembly. Has GTPase activity (By similarity)	No
COG1163	1.37584	0.883038	0.664205	1.32946	0.183695	0.344668	NOG	636	365	S	GTP-Binding protein	No
COG1167	2.53799	0.870412	0.471151	1.84742	0.0646867	0.173896	NOG	4453	1351	K	Transcriptional regulator, gntR family	No
COG1171	1.67912	-0.871997	0.607622	-1.4351	0.151259	0.306059	NOG	3152	1532	E	Threonine dehydratase	No
COG1175	1.89898	0.573794	0.681218	0.842306	0.399617	0.572956	NOG	6006	1060	P	binding-protein-dependent transport systems inner membrane Component	No
COG1185	3.62399	0.516392	0.558512	0.924585	0.355182	0.533876	NOG	2079	1796	J	Involved in mRNA degradation. Hydrolyzes single-stranded polyribonucleotides processively in the 3'- to 5'-direction (By similarity)	No
COG1187	2.92129	1.54728	0.620882	2.49206	0.0127005	0.0627248	NOG	3611	1686	J	pseudouridine synthase activity	No
COG1190	3.50356	1.00296	0.463358	2.16455	0.0304221	0.104874	NOG	2001	1697	J	lysyl-trna synthetase	No
COG1191	1.00512	0.305017	0.835523	0.365062	0.715065	0.825784	NOG	2108	886	K	Sigma factors are initiation factors that promote the attachment of RNA polymerase to specific initiation sites and are then released (By similarity)	No
COG1192	2.47295	-0.232692	0.699163	-0.332816	0.739274	0.845559	NOG	3898	1554	D	cobyrinic Acid a,c-diamide synthase	No
COG1196	4.36538	-0.560956	0.461542	-1.2154	0.224215	0.394332	NOG	3153	1539	D	Required for chromosome condensation and partitioning (By similarity)	No
COG1197	2.64656	0.851221	0.711386	1.19657	0.231476	0.401844	NOG	1676	1599	L	transcriptioN-repair coupling factor	No
COG1204	1.88264	-0.0444259	0.576866	-0.0770125	0.938614	0.966147	NOG	1558	536	L	helicase	No
COG1208	3.48379	-0.853704	0.499083	-1.71054	0.0871653	0.212641	NOG	3158	1367	M	nucleotidyl transferase	No
COG1219	2.6823	0.426701	0.538893	0.791811	0.428471	0.600753	NOG	2058	1799	O	ATP-dependent specificity component of the Clp protease. It directs the protease to specific substrates. Can perform chaperone functions in the absence of ClpP (By similarity)	No
COG1222	16.6686	0.400685	0.240867	1.66351	0.096211	0.228265	NOG	2086	342	O	26S protease regulatory subunit	No
COG1224	0.874258	-1.02292	0.703053	-1.45496	0.145679	0.298261	NOG	591	287	K	ruvB-like	No
COG1225	1.27673	-0.4359	0.709969	-0.61397	0.539235	0.68923	NOG	2522	1457	O	alkyl hydroperoxide reductase Thiol specific antioxidant Mal allergen	No
COG1226	2.49936	0.376008	0.551526	0.681759	0.495392	0.661616	NOG	7625	1493	P	PotAssium voltage-gated channel	No
COG1230	5.28484	0.705805	0.476971	1.47977	0.138936	0.288357	NOG	2656	1235	P	cation diffusion facilitator family transporter	No
COG1232	1.21263	0.601092	0.744168	0.807737	0.419242	0.596102	NOG	1010	763	H	protoporphyrinogen oxidase	No
COG1236	1.14357	-1.36411	0.770772	-1.7698	0.0767601	0.196752	NOG	2380	1000	J	cleavage and polyadenylation	No
COG1241	1.95778	-0.600232	0.580971	-1.03315	0.301532	0.474452	NOG	2169	353	L	dna replication licensing factor	No
COG1245	1.28272	0.87502	0.644954	1.35672	0.174871	0.332694	NOG	396	339	S	ATP-binding cassette, sub-family E	No
COG1249	11.7899	-0.103553	0.437138	-0.236889	0.812743	0.890778	NOG	5913	1808	C	dihydrolipoyl dehydrogenase	No
COG1250	6.27879	0.464063	0.4854	0.956041	0.339052	0.518373	NOG	3899	1256	I	Dehydrogenase	No
COG1251	1.7756	0.639181	0.660643	0.967514	0.333287	0.511774	NOG	1150	717	C	nitrite reductase	No
COG1252	2.37596	-0.460411	0.570658	-0.806806	0.419778	0.596164	NOG	2412	1220	C	Nadh dehydrogenase	No
COG1253	4.29542	-0.623529	0.658112	-0.947451	0.343409	0.521361	NOG	4033	1818	P	CBS Domain protein	No
COG1257	1.10709	-0.14555	0.718391	-0.202605	0.839444	0.905641	NOG	804	656	I	)-reductase	No
COG1260	3.92188	-0.501747	0.493949	-1.01579	0.309731	0.48546	NOG	675	542	I	synthase	No
COG1263	3.1973	1.03269	0.552822	1.86804	0.0617567	0.168301	NOG	2653	650	G	PTS System	No
COG1278	3.43336	-0.0217472	0.57335	-0.0379301	0.969743	0.983562	NOG	4636	1436	K	Cold shock protein	No
COG1282	2.60988	0.0436096	0.51967	0.083918	0.933122	0.964199	NOG	952	854	C	The transhydrogenation between NADH and NADP is coupled to respiration and ATP hydrolysis and functions as a proton pump across the membrane (By similarity)	No
COG1287	1.51745	0.0189711	0.660576	0.028719	0.977089	0.986876	NOG	691	399	S	oligosaccharyl transferase STT3 subunit	No
COG1292	3.02965	1.42313	0.634519	2.24285	0.0249064	0.0930745	NOG	1490	675	P	Transporter	No
COG1301	1.8789	-0.455952	0.633079	-0.720213	0.471394	0.638016	NOG	3070	1218	C	sodium dicarboxylate symporter	No
COG1304	2.3682	-0.622197	0.58661	-1.06067	0.288841	0.463525	NOG	2453	1267	C	Catalyzes the 1,3-allylic rearrangement of the homoallylic substrate isopentenyl (IPP) to its allylic isomer, dimethylallyl diphosphate (DMAPP) (By similarity)	No
COG1308	4.30442	0.253692	0.38597	0.657285	0.510998	0.671344	NOG	502	342	K	nascent polypeptide-associated complex	No
COG1309	2.09657	1.45782	0.584917	2.49235	0.01269	0.0627248	NOG	7359	1396	K	Transcriptional regulator	No
COG1310	4.62075	-0.0815673	0.405334	-0.201235	0.840515	0.905641	NOG	2313	648	S	Component of the eukaryotic translation initiation factor 3 (eIF-3) complex, which is involved in protein synthesis and, together with other initiation factors, stimulates binding of mRNA and methionyl-tRNAi to the 40S ribosome (By similarity)	No
COG1329	1.28578	0.791622	0.751854	1.05289	0.29239	0.467979	NOG	566	524	K	Transcriptional regulator (CarD family	No
COG1358	44.2953	0.354756	0.250631	1.41545	0.156936	0.310831	NOG	2085	719	J	(ribosomal) protein	No
COG1364	0.697546	-1.20881	0.828586	-1.45888	0.144597		NOG	1207	1149	E	Catalyzes two activities which are involved in the cyclic version of arginine biosynthesis the synthesis of N- acetylglutamate from glutamate and acetyl-CoA as the acetyl donor, and of ornithine by transacetylation between N(2)-acetylornithine and glutamate (By similarity)	No
COG1368	1.77795	-0.726824	0.71215	-1.02061	0.307441	0.483122	NOG	1438	774	M	Sulfatase	No
COG1390	1.22385	-0.483749	0.630008	-0.767845	0.442579	0.613426	NOG	528	396	C	Produces ATP from ADP in the presence of a proton gradient across the membrane (By similarity)	No
COG1394	0.861754	-0.808067	0.773812	-1.04427	0.296362	0.473143	NOG	770	633	C	Produces ATP from ADP in the presence of a proton gradient across the membrane (By similarity)	No
COG1398	7.9139	0.119553	0.399453	0.299292	0.764717	0.858356	NOG	1212	630	I	desaturase	No
COG1404	13.4037	-0.719364	0.341959	-2.10366	0.0354083	0.115483	NOG	7441	1358	O	peptidase (S8 and S53, subtilisin, kexin, sedolisin	No
COG1410	1.87577	0.995854	0.660687	1.5073	0.131734	0.277696	NOG	1432	1194	E	methionine synthase	No
COG1454	2.23158	0.0392653	0.666425	0.0589193	0.953016	0.975592	NOG	3178	1330	C	alcohol dehydrogenase	No
COG1471	22.4071	0.221227	0.217987	1.01487	0.31017	0.485518	NOG	597	350	J	(ribosomal) protein	No
COG1488	2.85552	-0.856821	0.640399	-1.33795	0.180914	0.340974	NOG	1898	1589	H	Nicotinate phosphoribosyltransferase	No
COG1498	4.17412	-0.389889	0.475794	-0.819449	0.41253	0.588634	NOG	966	353	J	Nucleolar protein	No
COG1501	2.87118	-1.14412	0.584186	-1.95848	0.0501738	0.144893	NOG	2548	801	G	hydrolase, family 31	No
COG1503	1.8609	0.762943	0.517948	1.47301	0.140748	0.290623	NOG	496	364	J	Peptide Chain Release Factor	No
COG1505	1.43337	-1.32765	0.826229	-1.60688	0.10808	0.244342	NOG	704	546	E	prolyl oligopeptidase	No
COG1506	1.37532	-0.659573	0.636692	-1.03594	0.300231	0.473638	NOG	3451	991	E	peptidase s9 prolyl oligopeptidase active site domain protein	No
COG1525	0.836766	-0.834038	0.759439	-1.09823	0.272104	0.443728	NOG	1451	853	L	nuclease	No
COG1527	0.955288	-0.797321	0.708794	-1.1249	0.260633	0.429069	NOG	572	480	C	ATP synthase, subunit	No
COG1530	2.29785	1.45251	0.607147	2.39235	0.0167408	0.0731279	NOG	1863	1360	J	ribonuclease	No
COG1537	0.786196	-2.09768	0.926404	-2.26432	0.0235545	0.0906395	NOG	368	336	S	May function in recognizing stalled ribosomes, interact with stem-loop structures in stalled mRNA molecules, and effect endonucleolytic cleavage of the mRNA. May play a role in the release non-functional ribosomes and degradation of damaged mRNAs. Has endoribonuclease activity (By similarity)	No
COG1538	3.64375	1.35603	0.63334	2.14108	0.0322677	0.108455	NOG	4936	981	M	Membrane	No
COG1552	10.9921	0.32926	0.289841	1.136	0.255956	0.425442	NOG	406	304	J	Ribosomal protein	No
COG1562	0.756191	-1.84909	0.844319	-2.19004	0.0285215	0.102231	NOG	1642	913	I	phytoene synthase	No
COG1574	1.00741	-0.596719	0.831196	-0.717904	0.472817	0.639227	NOG	1410	797	S	amidohydrolase	No
COG1594	0.553017	-1.52812	0.864868	-1.76688	0.0772487		NOG	1496	352	K	DNA-dependent RNA polymerase catalyzes the transcription of DNA into RNA using the four ribonucleoside triphosphates as substrates (By similarity)	No
COG1595	2.74224	0.188371	0.620091	0.30378	0.761296	0.856104	NOG	7899	1315	K	RNA Polymerase	No
COG1601	3.23269	0.295034	0.446185	0.661237	0.50846	0.670778	NOG	713	353	J	translation Initiation Factor	No
COG1609	4.0006	0.835408	0.591769	1.41171	0.158035	0.311944	NOG	8685	1164	K	Transcriptional regulator	No
COG1621	2.93727	-1.01607	0.690682	-1.47111	0.141261	0.291185	NOG	1348	640	G	Hydrolase	No
COG1626	2.33006	-0.143008	0.600453	-0.238166	0.811752	0.890499	NOG	581	381	G	trehalase	No
COG1631	21.4081	0.647285	0.360429	1.79588	0.0725142	0.188693	NOG	516	334	J	Ribosomal protein	No
COG1632	24.3191	0.7555	0.338343	2.23294	0.0255528	0.0941998	NOG	472	348	J	Ribosomal protein L15	No
COG1635	1.53151	-0.531384	0.715672	-0.742496	0.457787	0.627746	NOG	269	237	H	Involved in biosynthesis of the thiamine precursor thiazole. Catalyzes the conversion of NAD and glycine to adenosine diphosphate 5-(2-hydroxyethyl)-4-methylthiazole-2-carboxylic acid (ADT), an adenylated thiazole intermediate. The reaction includes an iron-dependent sulfide transfer from a conserved cysteine residue of the protein to a thiazole intermediate. The enzyme can only undergo a single …	No
COG1643	4.81596	0.355248	0.486253	0.730583	0.465034	0.631308	NOG	4592	1053	L	helicase	No
COG1648	1.52896	1.03686	0.657079	1.57799	0.114569	0.253434	NOG	1186	1021	H	Multifunctional enzyme that catalyzes the SAM-dependent methylation of uroporphyrinogen III at position C-2 and C-7 to form precorrin-2 and then position C-12 or C-18 to form trimethylpyrrocorphin 2. It also catalyzes the conversion of precorrin-2 into siroheme. This reaction consists of the NAD- dependent oxidation of precorrin-2 into sirohydrochlorin and its subsequent ferrochelation into siroh…	No
COG1670	1.81384	0.578523	0.67551	0.856424	0.391763	0.564767	NOG	5966	1449	J	-acetyltransferase	No
COG1674	1.4939	1.14767	0.721681	1.59027	0.111773	0.250428	NOG	2543	1544	D	cell division protein FtsK	No
COG1717	14.3981	0.137848	0.444214	0.310319	0.756319	0.852091	NOG	543	334	J	(ribosomal) protein	No
COG1718	1.29143	-1.89574	0.743377	-2.55017	0.010767	0.0571407	NOG	634	515	T	serine threonine-protein kinase	No
COG1723	0.744502	-0.483299	0.831263	-0.581403	0.560969	0.704852	NOG	537	309	S	Required for meiotic nuclear division 1 homolog (S. cerevisiae)	No
COG1741	3.71648	-1.23422	0.664627	-1.85701	0.0633094	0.171629	NOG	2217	1065	S	pirin domain protein	No
COG1748	1.26206	-0.0418332	0.676478	-0.0618397	0.950691	0.974861	NOG	1144	849	E	saccharopine dehydrogenase	No
COG1752	2.92326	-0.0127675	0.495988	-0.0257415	0.979464	0.988449	NOG	2472	1166	S	K07001 NTE family protein	No
COG1785	3.30107	-0.0647341	0.769123	-0.084166	0.932924	0.964199	NOG	1256	717	P	alkaline phosphatase	No
COG1788	2.5629	-0.934354	0.572722	-1.63143	0.1028	0.238749	NOG	1368	844	I	Key enzyme for ketone body catabolism. Transfers the CoA moiety from succinate to acetoacetate. Formation of the enzyme-CoA intermediate proceeds via an unstable anhydride species formed between the carboxylate groups of the enzyme and substrate (By similarity)	No
COG1804	1.90282	0.332783	0.594711	0.55957	0.575773	0.712986	NOG	3774	839	C	l-carnitine dehydratase bile acid-inducible protein F	No
COG1813	3.48981	-1.1346	0.595187	-1.9063	0.0566116	0.159674	NOG	406	330	K	Factor 1	No
COG1816	1.87418	-0.00517949	0.613284	-0.0084455	0.993262	0.993988	NOG	2035	909	F	adenosine deaminase	No
COG1840	1.70591	-0.140941	0.700424	-0.201223	0.840524	0.905641	NOG	2123	969	P	extracellular solute-binding protein, family 1	No
COG1841	23.7884	0.460003	0.265228	1.73437	0.0828526	0.205767	NOG	1955	1517	J	ribosomal large subunit biogenesis	No
COG1866	20.2884	-0.562885	0.395252	-1.42412	0.154413	0.308825	NOG	973	866	C	Phosphoenolpyruvate Carboxylase	No
COG1881	0.730237	-1.2127	0.804515	-1.50736	0.131717	0.277696	NOG	1823	943	S	phosphatidylethanolamine-binding protein	No
COG1889	2.99321	-0.691593	0.512628	-1.34911	0.177301	0.336261	NOG	436	345	J	Involved in pre-rRNA and tRNA processing. Utilizes the methyl donor S-adenosyl-L-methionine to catalyze the site-specific 2'-hydroxyl methylation of ribose moieties in rRNA and tRNA. Site specificity is provided by a guide RNA that base pairs with the substrate. Methylation occurs at a characteristic distance from the sequence involved in base pairing with the guide RNA (By similarity)	No
COG1890	40.2879	0.0905348	0.385079	0.235107	0.814126	0.891454	NOG	542	350	J	Ribosomal protein	No
COG1894	2.68185	-0.38358	0.547444	-0.700674	0.483507	0.650048	NOG	1905	1207	C	Nadh dehydrogenase	No
COG1902	5.05115	-0.734554	0.378848	-1.93892	0.0525116	0.150566	NOG	4509	1358	C	NADH flavin oxidoreductase, NADH oxidase	No
COG1905	1.14169	-0.20737	0.717658	-0.288954	0.772616	0.865617	NOG	1619	1157	C	Nadh dehydrogenase	No
COG1911	11.1271	-0.0827962	0.358516	-0.230942	0.81736	0.891573	NOG	457	321	J	(ribosomal) protein	No
COG1928	2.25941	-0.423846	0.62733	-0.675635	0.499273	0.66533	NOG	748	382	O	dolichyl-phosphate-mannose-protein mannosyltransferase activity	No
COG1932	0.6415	-0.803439	0.821186	-0.978389	0.327882		NOG	1463	1354	E	Catalyzes the reversible conversion of 3- phosphohydroxypyruvate to phosphoserine and of 3-hydroxy-2-oxo-4- phosphonooxybutanoate to phosphohydroxythreonine (By similarity)	No
COG1940	2.15737	0.340954	0.658571	0.517717	0.604655	0.737533	NOG	5058	1421	G	ROK family	No
COG1957	0.660821	-0.758894	0.815195	-0.930936	0.351887		NOG	1642	825	F	nucleoside hydrolase	No
COG1958	3.64532	0.64972	0.436106	1.48982	0.136271	0.28429	NOG	2228	346	K	small nuclear ribonucleoprotein	No
COG1960	16.4451	0.211971	0.263465	0.804549	0.42108	0.596613	NOG	9610	1381	I	acyl-CoA dehydrogenase	No
COG1961	2.98997	0.632058	0.685329	0.92227	0.356388	0.535024	NOG	3745	1072	L	Resolvase	No
COG1972	1.39552	-1.14136	0.718555	-1.58841	0.112193	0.250428	NOG	1086	632	F	)-nucleoside	No
COG1997	12.5958	0.304715	0.380496	0.800835	0.423227	0.598227	NOG	467	337	J	Ribosomal protein	No
COG1998	2.4785	0.126593	0.542742	0.233246	0.81557	0.891454	NOG	175	147	J	30S ribosomal protein S27Ae	No
COG2004	6.78271	-0.762595	0.350887	-2.17334	0.0297551	0.103675	NOG	542	345	J	40S ribosomal protein S24	No
COG2007	20.8964	-0.21153	0.324583	-0.651698	0.514596	0.673876	NOG	760	352	J	40S ribosomal protein S8	No
COG2025	1.91234	-0.381442	0.575543	-0.662752	0.507489	0.670778	NOG	1986	1300	C	Electron transfer flavoprotein	No
COG2030	4.82904	-0.433101	0.374861	-1.15536	0.247941	0.416679	NOG	3104	1087	I	maoc domain protein dehydratase	No
COG2032	6.07545	-0.794517	0.442707	-1.79468	0.0727047	0.188783	NOG	1009	670	P	Destroys radicals which are normally produced within the cells and which are toxic to biological systems (By similarity)	No
COG2036	70.7909	1.04205	0.423838	2.45861	0.0139476	0.0659242	NOG	4598	321	B	Core component of nucleosome. Nucleosomes wrap and compact DNA into chromatin, limiting DNA accessibility to the cellular machineries which require DNA as a template. Histones thereby play a central role in transcription regulation, DNA repair, DNA replication and chromosomal stability. DNA accessibility is regulated via a complex set of post-translational modifications of histones, also called h…	No
COG2046	2.48648	-0.195139	0.526271	-0.370795	0.71079	0.823808	NOG	729	558	P	Catalyzes the first intracellular reaction of sulfate assimilation, forming adenosine-5'-phosphosulfate (APS) from inorganic sulfate and ATP. Plays an important role in sulfate activation as a component of the biosynthesis pathway of sulfur- containing amino acids (By similarity)	No
COG2050	0.911652	0.960391	0.85226	1.12688	0.259795	0.428857	NOG	3028	1348	Q	thioesterase Superfamily protein	No
COG2051	9.16269	0.80998	0.384381	2.10723	0.0350974	0.115089	NOG	517	340	J	40s ribosomal protein S27	No
COG2057	3.0206	-0.646945	0.555996	-1.16358	0.244595	0.41451	NOG	1354	841	I	Key enzyme for ketone body catabolism. Transfers the CoA moiety from succinate to acetoacetate. Formation of the enzyme-CoA intermediate proceeds via an unstable anhydride species formed between the carboxylate groups of the enzyme and substrate (By similarity)	No
COG2070	5.6532	-0.387171	0.492559	-0.78604	0.431844	0.604782	NOG	2546	1243	S	2-Nitropropane dioxygenase	No
COG2072	2.62492	-0.309663	0.522291	-0.592893	0.553253	0.701715	NOG	4463	734	P	Monooxygenase	No
COG2074	0.411829	-1.1139	1.03446	-1.07679	0.281573		NOG	190	102	G	2-Phosphoglycerate kinase	No
COG2075	12.4658	0.137634	0.325554	0.422768	0.672465	0.79254	NOG	716	351	J	Ribosomal protein	No
COG2079	3.63218	0.832386	0.540506	1.54001	0.123557	0.268208	NOG	919	585	S	MMGE PRPD family protein	No
COG2084	2.23199	0.361988	0.614128	0.589434	0.55557	0.70318	NOG	3131	1223	I	Dehydrogenase	No
COG2086	1.68196	-0.145279	0.571337	-0.254279	0.79928	0.879208	NOG	1901	1294	C	Electron transfer flavoprotein	No
COG2097	8.98414	-0.621352	0.402218	-1.54481	0.122392	0.266836	NOG	605	341	J	(ribosomal) protein	No
COG2101	2.90817	0.259215	0.45256	0.572774	0.566798	0.706308	NOG	658	349	K	General factor that plays a role in the activation of archaeal genes transcribed by RNA polymerase. Binds specifically to the TATA box promoter element which lies close to the position of transcription initiation (By similarity)	No
COG2110	0.371634	-0.827984	1.00915	-0.820477	0.411944		NOG	1882	1001	S	appr-1-p processing domain protein	No
COG2114	2.47487	-1.04246	0.707256	-1.47395	0.140495	0.290597	NOG	4541	722	T	Guanylate Cyclase	No
COG2119	1.05316	-0.311333	0.695894	-0.447386	0.654597	0.778822	NOG	829	632	S	transmembrane protein 165	No
COG2125	21.0792	0.641049	0.265334	2.41601	0.0156918	0.0698503	NOG	531	350	J	40s ribosomal protein s6	No
COG2126	7.1347	-0.960376	0.415573	-2.31097	0.0208347	0.0843144	NOG	451	320	J	Binds to the 23S rRNA (By similarity)	No
COG2130	3.80062	-0.73728	0.538167	-1.36998	0.170692	0.328678	NOG	1402	661	S	alcohol dehydrogenase	No
COG2132	3.45657	-1.13994	0.592088	-1.92528	0.0541937	0.154293	NOG	3876	1017	Q	Multicopper oxidase	No
COG2136	0.653157	-0.912325	0.818254	-1.11497	0.264865		NOG	647	319	AJ	u3 small nucleolar ribonucleoprotein	No
COG2139	13.5485	0.115158	0.364139	0.316248	0.751814	0.850977	NOG	654	350	J	(ribosomal) protein	No
COG2141	2.66366	1.1516	0.559915	2.05674	0.0397116	0.124485	NOG	4211	920	C	Monooxygenase	No
COG2147	16.1673	0.217005	0.393623	0.551302	0.581427	0.716422	NOG	495	342	J	ribosomal protein L19	No
COG2157	11.7463	0.802998	0.37191	2.15912	0.0308408	0.105673	NOG	483	331	J	ribosomal protein	No
COG2159	1.24032	-0.91968	0.776282	-1.18472	0.236127	0.40642	NOG	1458	650	S	amidohydrolase 2	No
COG2163	27.0287	-0.575924	0.355377	-1.6206	0.105103	0.24219	NOG	1099	306	J	(ribosomal) protein	No
COG2167	6.28536	-0.11423	0.343822	-0.332237	0.73971	0.845559	NOG	376	281	J	Ribosomal protein	No
COG2174	8.66172	-0.183036	0.370258	-0.494346	0.621062	0.751484	NOG	418	289	J	(ribosomal) protein	No
COG2175	0.994102	-1.9279	0.768057	-2.5101	0.0120698	0.0617137	NOG	1618	497	Q	dioxygenase	No
COG2183	1.84081	0.460335	0.575897	0.799336	0.424096	0.598227	NOG	1599	1380	K	domain protein	No
COG2186	1.33579	1.24607	0.820188	1.51924	0.128701	0.274451	NOG	3096	887	K	GntR family transcriptional regulator	No
COG2202	3.36482	-1.09641	0.517947	-2.11683	0.0342741	0.113933	NOG	2852	917	T	Histidine kinase	No
COG2214	2.1409	0.0143942	0.591406	0.024339	0.980582	0.988754	NOG	3382	1188	O	DNAj domain protein	No
COG2217	7.27728	0.134215	0.428497	0.313224	0.754111	0.852076	NOG	5705	1878	P	p-type ATPase	No
COG2224	4.5796	0.46731	0.513481	0.910082	0.362779	0.542599	NOG	795	658	C	Isocitrate lyase	No
COG2225	2.99615	0.0544123	0.470381	0.115677	0.907909	0.95032	NOG	981	791	C	malate synthase	No
COG2230	2.41252	0.12605	0.582253	0.216487	0.828608	0.899617	NOG	1673	904	M	cyclopropane-fatty-acyl-phospholipid synthase	No
COG2233	2.88468	1.64705	0.64228	2.56438	0.0103361	0.0555854	NOG	2895	1277	F	permease	No
COG2234	5.15354	-1.22721	0.496514	-2.47166	0.0134488	0.0648328	NOG	2932	744	S	peptidase m28	No
COG2238	7.86229	-0.387265	0.448458	-0.863548	0.387836	0.562014	NOG	476	339	J	Ribosomal protein	No
COG2252	1.9821	0.309451	0.727573	0.425319	0.670604	0.79164	NOG	1946	1252	S	Xanthine uracil vitamin C permease	No
COG2262	1.05886	-0.00564696	0.749462	-0.00753469	0.993988	0.993988	NOG	1801	1656	S	GTPase that associates with the 50S ribosomal subunit and may have a role during protein synthesis or ribosome biogenesis (By similarity)	No
COG2267	2.06326	0.0290804	0.579804	0.0501556	0.959998	0.980251	NOG	2113	1159	I	alpha beta hydrolase fold	No
COG2268	1.33223	-1.02046	0.882439	-1.15641	0.247513	0.416672	NOG	795	559	S	Band 7 protein	No
COG2272	1.18901	-0.8288	0.72832	-1.13796	0.255137	0.425442	NOG	4329	526	I	Carboxylesterase	No
COG2319	2.29772	-1.27714	0.61482	-2.07726	0.0377776	0.120609	NOG	3206	570	S	wd repeat	No
COG2352	3.18496	1.429	0.692735	2.06283	0.0391285	0.123618	NOG	1000	849	C	phosphoenolpyruvate carboxylase activity	No
COG2365	0.907134	-0.15401	0.859659	-0.179152	0.857818	0.916415	NOG	1191	615	T	protein tyrosine serine phosphatase	No
COG2451	7.38906	0.087985	0.462091	0.190406	0.848991	0.910708	NOG	383	248	J	Ribosomal protein	No
COG2513	0.917408	0.00620427	0.777218	0.00798267	0.993631	0.993988	NOG	1318	775	G	methylisocitrate lyase	No
COG2518	0.698677	-1.218	0.847655	-1.4369	0.150746		NOG	1776	1078	O	Catalyzes the methyl esterification of L-isoaspartyl residues in peptides and proteins that result from spontaneous decomposition of normal L-aspartyl and L-asparaginyl residues. It plays a role in the repair and or degradation of damaged proteins (By similarity)	No
COG2609	2.6236	1.17648	0.627126	1.87599	0.0606568	0.166428	NOG	817	653	C	Component of the pyruvate dehydrogenase (PDH) complex, that catalyzes the overall conversion of pyruvate to acetyl-CoA and CO(2) (By similarity)	No
COG2706	1.23501	-2.13212	0.823073	-2.59043	0.0095855	0.0534491	NOG	851	618	G	6-phosphogluconolactonase	No
COG2755	2.03578	-1.35356	0.602258	-2.24747	0.02461	0.0927668	NOG	3081	1375	E	lipolytic protein G-D-S-L family	No
COG2759	1.34887	0.625338	0.619115	1.01005	0.312471	0.487858	NOG	1245	1048	F	formyltetrahydrofolate synthetase	No
COG2770	2.07044	-0.334626	0.739254	-0.452654	0.650798	0.775064	NOG	370	264	T	Histidine kinase	No
COG2801	9.40128	-0.274277	0.429429	-0.638702	0.523017	0.679024	NOG	23892	1264	L	Retrotransposon protein	No
COG2826	2.72875	1.11178	0.639468	1.73859	0.0821062	0.204842	NOG	1734	395	L	transposase	No
COG2828	1.40166	-0.533627	0.860504	-0.620133	0.53517	0.68923	NOG	490	381	S	AcnD-accessory protein PrpF	No
COG2857	3.21738	-0.37241	0.499222	-0.745981	0.455679	0.626558	NOG	991	818	C	cytochrome c1	No
COG2866	2.39091	-0.965505	0.619518	-1.55848	0.11912	0.262064	NOG	2548	737	E	metallocarboxypeptidase activity	No
COG2885	2.28124	0.948522	0.6245	1.51885	0.1288	0.274451	NOG	4369	1036	M	Ompa motb domain protein	No
[truncated: 657 more rows]

## Sheet: DESeq2_COGs_NvsCont
id	baseMean	log2FoldChange	lfcSE	stat	pvalue	padj	Database	Protein count	Species count	COG functional category	Consensus functional description	Significant
[truncated: 1,466 more rows]
